# Supplementary material
Source: publisher figshare collection journal article supplement (https://acs.figshare.com/ndownloader/files/9158743)
Supplement: Supplementary file 1 [file 9158743]

data_NIH29
_audit_creation_date              2017-05-05
_audit_creation_method
;
Olex2 1.2-beta
(compiled 2017.03.28 svn.r3405 for OlexSys, GUI svn.r5335)
;
_shelx_SHELXL_version_number      '2016/6'
_publ_contact_author_address      ?
_publ_contact_author_email        ?
_publ_contact_author_id_orcid     ?
_publ_contact_author_name         ''
_publ_contact_author_phone        ?
_publ_section_references
;
Dolomanov, O.V., Bourhis, L.J., Gildea, R.J, Howard, J.A.K. & Puschmann, H.
 (2009), J. Appl. Cryst. 42, 339-341.

Sheldrick, G.M. (2015). Acta Cryst. A71, 3-8.

Sheldrick, G.M. (2015). Acta Cryst. C71, 3-8.
;
_chemical_name_common             ?
_chemical_name_systematic         ?
_chemical_formula_moiety          'C12 H14 Cl N O2'
_chemical_formula_sum             'C12 H14 Cl N O2'
_chemical_formula_weight          239.69
_chemical_absolute_configuration  ad
_chemical_melting_point           ?
loop_
  _atom_type_symbol
  _atom_type_description
  _atom_type_scat_dispersion_real
  _atom_type_scat_dispersion_imag
  _atom_type_scat_source
 'C' 'C' 0.0181 0.0091 'International Tables Vol C Tables 4.2.6.8 and 6.1.1.4'
 'H' 'H' 0.0000 0.0000 'International Tables Vol C Tables 4.2.6.8 and 6.1.1.4'
 'Cl' 'Cl' 0.3639 0.7018 'International Tables Vol C Tables 4.2.6.8 and 6.1.1.4'
 'N' 'N' 0.0311 0.0180 'International Tables Vol C Tables 4.2.6.8 and 6.1.1.4'
 'O' 'O' 0.0492 0.0322 'International Tables Vol C Tables 4.2.6.8 and 6.1.1.4'

_shelx_space_group_comment
;
The symmetry employed for this shelxl refinement is uniquely defined
by the following loop, which should always be used as a source of
symmetry information in preference to the above space-group names.
They are only intended as comments.
;
_space_group_crystal_system       'orthorhombic'
_space_group_IT_number            19
_space_group_name_H-M_alt         'P 21 21 21'
_space_group_name_Hall            'P 2ac 2ab'
loop_
  _space_group_symop_operation_xyz
 'x, y, z'
 '-x+1/2, -y, z+1/2'
 '-x, y+1/2, -z+1/2'
 'x+1/2, -y+1/2, -z'

_cell_length_a                    8.1094(2)
_cell_length_b                    8.6923(2)
_cell_length_c                    33.1247(7)
_cell_angle_alpha                 90
_cell_angle_beta                  90
_cell_angle_gamma                 90
_cell_volume                      2334.94(9)
_cell_formula_units_Z             8
_cell_measurement_reflns_used     6051
_cell_measurement_temperature     100.0
_cell_measurement_theta_max       68.256
_cell_measurement_theta_min       2.668
_shelx_estimated_absorpt_T_max    0.957
_shelx_estimated_absorpt_T_min    0.744
_exptl_absorpt_coefficient_mu     2.778
_exptl_absorpt_correction_T_max   0.5210
_exptl_absorpt_correction_T_min   0.4136
_exptl_absorpt_correction_type    multi-scan
_exptl_absorpt_process_details
'SADABS-2016/2 (Bruker,2016/2) was used for absorption correction. wR2(int) was 0.0757 before and 0.0520 after correction. The Ratio of minimum to maximum transmission is 0.7939. The \l/2 correction factor is Not present.'
_exptl_absorpt_special_details    ?
_exptl_crystal_colour             Colorless
_exptl_crystal_colour_primary     Colorless
_exptl_crystal_density_diffrn     1.364
_exptl_crystal_density_meas       ?
_exptl_crystal_density_method     ?
_exptl_crystal_description        Plate
_exptl_crystal_F_000              1008
_exptl_crystal_size_max           0.113
_exptl_crystal_size_mid           0.057
_exptl_crystal_size_min           0.016
_exptl_transmission_factor_max    ?
_exptl_transmission_factor_min    ?
_diffrn_reflns_av_R_equivalents   0.0502
_diffrn_reflns_av_unetI/netI      0.0496
_diffrn_reflns_Laue_measured_fraction_full 1.000
_diffrn_reflns_Laue_measured_fraction_max 1.000
_diffrn_reflns_limit_h_max        9
_diffrn_reflns_limit_h_min        -9
_diffrn_reflns_limit_k_max        10
_diffrn_reflns_limit_k_min        -10
_diffrn_reflns_limit_l_max        39
_diffrn_reflns_limit_l_min        -39
_diffrn_reflns_number             13135
_diffrn_reflns_point_group_measured_fraction_full 0.995
_diffrn_reflns_point_group_measured_fraction_max 0.993
_diffrn_reflns_theta_full         68.000
_diffrn_reflns_theta_max          68.306
_diffrn_reflns_theta_min          2.668
_diffrn_ambient_temperature       100.0
_diffrn_detector                  'Bruker APEX-II CCD'
_diffrn_detector_area_resol_mean  7.9
_diffrn_detector_type             'CCD Area Detector'
_diffrn_measured_fraction_theta_full 1.000
_diffrn_measured_fraction_theta_max 1.000
_diffrn_measurement_device        'Kappa Four-Circle Diffractometer'
_diffrn_measurement_device_type   'Bruker X8 APEX II'
_diffrn_measurement_method        '\w and \f scans'
_diffrn_radiation_monochromator   'Double Bounce Multilayer Mirrors'
_diffrn_radiation_probe           X-ray
_diffrn_radiation_type            CuK\a
_diffrn_radiation_wavelength      1.54178
_diffrn_radiation_xray_symbol     K-L~3~
_diffrn_source                    'Micro Focus Rotating Anode'
_diffrn_source_type               'Bruker Microstar FR-592'
_diffrn_special_details           ?
_diffrn_standards_number          0
_reflns_Friedel_coverage          0.713
_reflns_Friedel_fraction_full     0.988
_reflns_Friedel_fraction_max      0.984
_reflns_number_gt                 3706
_reflns_number_total              4251
_reflns_special_details
;
 Reflections were merged by SHELXL according to the crystal
 class for the calculation of statistics and refinement.
 
 _reflns_Friedel_fraction is defined as the number of unique
 Friedel pairs measured divided by the number that would be
 possible theoretically, ignoring centric projections and
 systematic absences.
;
_reflns_threshold_expression      'I > 2\s(I)'
_computing_cell_refinement        'SAINT V8.38A (Bruker, 2017)'
_computing_data_collection        'APEX3 v2016.9-0 (Bruker, 2016)'
_computing_data_reduction         'SAINT V8.38A (Bruker, 2017)'
_computing_molecular_graphics     'Olex2 (Dolomanov et al., 2009)'
_computing_publication_material   'Olex2 (Dolomanov et al., 2009)'
_computing_structure_refinement   'ShelXL (Sheldrick, 2015)'
_computing_structure_solution     'ShelXT (Sheldrick, 2015)'
_refine_diff_density_max          0.355
_refine_diff_density_min          -0.335
_refine_diff_density_rms          0.052
_refine_ls_abs_structure_details
;
 Flack x determined using 1376 quotients [(I+)-(I-)]/[(I+)+(I-)]
 (Parsons, Flack and Wagner, Acta Cryst. B69 (2013) 249-259).
;
_refine_ls_abs_structure_Flack    -0.005(12)
_refine_ls_extinction_coef        .
_refine_ls_extinction_method      none
_refine_ls_goodness_of_fit_ref    1.015
_refine_ls_hydrogen_treatment     mixed
_refine_ls_matrix_type            full
_refine_ls_number_parameters      313
_refine_ls_number_reflns          4251
_refine_ls_number_restraints      6
_refine_ls_R_factor_all           0.0501
_refine_ls_R_factor_gt            0.0408
_refine_ls_restrained_S_all       1.015
_refine_ls_shift/su_max           0.001
_refine_ls_shift/su_mean          0.000
_refine_ls_structure_factor_coef  Fsqd
_refine_ls_weighting_details
'w=1/[\s^2^(Fo^2^)+(0.0581P)^2^] where P=(Fo^2^+2Fc^2^)/3'
_refine_ls_weighting_scheme       calc
_refine_ls_wR_factor_gt           0.0944
_refine_ls_wR_factor_ref          0.0988
_refine_special_details           ?
_olex2_refinement_description
;
1. Fixed Uiso
 At 1.2 times of:
  All C(H) groups, All C(H,H) groups
2. Restrained distances
 N1-H1A = N1-H1B = O2-H2 = O2'-H2' = N1'-H1'B = N1'-H1'A
 0.95 with sigma of 0.02
3.a Ternary CH refined with riding coordinates:
 C11(H11), C11'(H11')
3.b Secondary CH2 refined with riding coordinates:
 C9(H9A,H9B), C10(H10A,H10B), C12(H12A,H12B), C9'(H9'A,H9'B), C10'(H10C,H10D),
 C12'(H12C,H12D)
3.c Aromatic/amide H refined with riding coordinates:
 C2(H2A), C3(H3), C4(H4), C5(H5), C2'(H2'A), C3'(H3'), C4'(H4'), C5'(H5')
;
_atom_sites_solution_hydrogens    mixed
_atom_sites_solution_primary      dual
_atom_sites_solution_secondary    difmap
loop_
  _atom_site_label
  _atom_site_type_symbol
  _atom_site_fract_x
  _atom_site_fract_y
  _atom_site_fract_z
  _atom_site_U_iso_or_equiv
  _atom_site_adp_type
  _atom_site_occupancy
  _atom_site_site_symmetry_order
  _atom_site_calc_flag
  _atom_site_refinement_flags_posn
  _atom_site_refinement_flags_adp
  _atom_site_refinement_flags_occupancy
  _atom_site_disorder_assembly
  _atom_site_disorder_group
 Cl1 Cl 0.78207(10) 0.74488(12) 0.57609(3) 0.0299(2) Uani 1 1 d . . . . .
 O1 O 0.5360(3) 0.7763(3) 0.50235(8) 0.0243(6) Uani 1 1 d . . . . .
 O2 O 0.7824(3) 0.2131(3) 0.54216(7) 0.0196(5) Uani 1 1 d D . . . .
 H2 H 0.804(6) 0.138(5) 0.5234(13) 0.044(14) Uiso 1 1 d D . . . .
 N1 N 0.3323(4) 0.4922(4) 0.52382(9) 0.0188(6) Uani 1 1 d D . . . .
 H1A H 0.275(5) 0.434(4) 0.5425(10) 0.019(10) Uiso 1 1 d D . . . .
 H1B H 0.261(5) 0.572(4) 0.5181(12) 0.023(11) Uiso 1 1 d D . . . .
 C1 C 0.5810(4) 0.7444(5) 0.59601(11) 0.0246(7) Uani 1 1 d . . . . .
 C2 C 0.5557(6) 0.8369(5) 0.62973(13) 0.0324(9) Uani 1 1 d . . . . .
 H2A H 0.643954 0.895326 0.640731 0.039 Uiso 1 1 calc R . . . .
 C3 C 0.4011(6) 0.8429(5) 0.64701(12) 0.0339(10) Uani 1 1 d . . . . .
 H3 H 0.381877 0.906196 0.669922 0.041 Uiso 1 1 calc R . . . .
 C4 C 0.2742(5) 0.7565(5) 0.63084(11) 0.0275(8) Uani 1 1 d . . . . .
 H4 H 0.167603 0.760189 0.642707 0.033 Uiso 1 1 calc R . . . .
 C5 C 0.3020(5) 0.6640(4) 0.59726(10) 0.0216(8) Uani 1 1 d . . . . .
 H5 H 0.213723 0.604524 0.586679 0.026 Uiso 1 1 calc R . . . .
 C6 C 0.4559(4) 0.6566(4) 0.57877(11) 0.0197(7) Uani 1 1 d . . . . .
 C7 C 0.4857(4) 0.5505(4) 0.54250(11) 0.0182(7) Uani 1 1 d . . . . .
 C8 C 0.5643(4) 0.6406(4) 0.50681(10) 0.0183(7) Uani 1 1 d . . . . .
 C9 C 0.6606(5) 0.5494(4) 0.47649(11) 0.0211(7) Uani 1 1 d . . . . .
 H9A H 0.728779 0.620838 0.460261 0.025 Uiso 1 1 calc R . . . .
 H9B H 0.582542 0.497803 0.457925 0.025 Uiso 1 1 calc R . . . .
 C10 C 0.7730(4) 0.4279(4) 0.49544(11) 0.0203(7) Uani 1 1 d . . . . .
 H10A H 0.826242 0.366887 0.473836 0.024 Uiso 1 1 calc R . . . .
 H10B H 0.860770 0.479362 0.511222 0.024 Uiso 1 1 calc R . . . .
 C11 C 0.6759(4) 0.3220(4) 0.52275(10) 0.0171(7) Uani 1 1 d . . . . .
 H11 H 0.591129 0.265896 0.506498 0.021 Uiso 1 1 calc R . . . .
 C12 C 0.5910(4) 0.4119(4) 0.55630(10) 0.0181(7) Uani 1 1 d . . . . .
 H12A H 0.676567 0.449688 0.575177 0.022 Uiso 1 1 calc R . . . .
 H12B H 0.519200 0.340297 0.571503 0.022 Uiso 1 1 calc R . . . .
 Cl1' Cl 0.58807(11) 0.22963(12) 0.66287(3) 0.0337(2) Uani 1 1 d . . . . .
 O1' O 0.8735(4) 0.1687(4) 0.72858(8) 0.0389(8) Uani 1 1 d . . . . .
 O2' O 1.0844(3) 0.3111(3) 0.57500(7) 0.0224(5) Uani 1 1 d D . . . .
 H2' H 0.980(4) 0.285(6) 0.5658(13) 0.034(12) Uiso 1 1 d D . . . .
 N1' N 1.0873(4) 0.4349(5) 0.70005(10) 0.0321(8) Uani 1 1 d D . . . .
 H1'A H 1.078(7) 0.439(6) 0.7280(8) 0.044(14) Uiso 1 1 d D . . . .
 H1'B H 1.101(7) 0.533(4) 0.6898(16) 0.047(16) Uiso 1 1 d D . . . .
 C1' C 0.6190(5) 0.4015(5) 0.68959(11) 0.0276(9) Uani 1 1 d . . . . .
 C2' C 0.4801(5) 0.4764(6) 0.70292(14) 0.0370(11) Uani 1 1 d . . . . .
 H2'A H 0.373926 0.435184 0.697409 0.044 Uiso 1 1 calc R . . . .
 C3' C 0.4955(6) 0.6120(7) 0.72439(14) 0.0449(13) Uani 1 1 d . . . . .
 H3' H 0.400139 0.663287 0.734181 0.054 Uiso 1 1 calc R . . . .
 C4' C 0.6489(6) 0.6722(7) 0.73149(15) 0.0500(14) Uani 1 1 d . . . . .
 H4' H 0.660488 0.766084 0.745886 0.060 Uiso 1 1 calc R . . . .
 C5' C 0.7873(6) 0.5949(6) 0.71748(13) 0.0405(11) Uani 1 1 d . . . . .
 H5' H 0.892731 0.638892 0.722258 0.049 Uiso 1 1 calc R . . . .
 C6' C 0.7787(5) 0.4574(5) 0.69697(11) 0.0265(9) Uani 1 1 d . . . . .
 C7' C 0.9329(5) 0.3747(5) 0.68244(10) 0.0234(8) Uani 1 1 d . . . . .
 C8' C 0.9373(5) 0.2063(5) 0.69697(11) 0.0283(9) Uani 1 1 d . . . . .
 C9' C 1.0459(6) 0.0961(5) 0.67386(12) 0.0381(11) Uani 1 1 d . . . . .
 H9'A H 1.010397 -0.010371 0.679929 0.046 Uiso 1 1 calc R . . . .
 H9'B H 1.160738 0.107687 0.683521 0.046 Uiso 1 1 calc R . . . .
 C10' C 1.0431(6) 0.1195(5) 0.62790(12) 0.0333(10) Uani 1 1 d . . . . .
 H10C H 1.127060 0.052712 0.615118 0.040 Uiso 1 1 calc R . . . .
 H10D H 0.933634 0.090221 0.617133 0.040 Uiso 1 1 calc R . . . .
 C11' C 1.0789(4) 0.2880(5) 0.61770(10) 0.0225(8) Uani 1 1 d . . . . .
 H11' H 1.188295 0.316707 0.629405 0.027 Uiso 1 1 calc R . . . .
 C12' C 0.9475(4) 0.3893(5) 0.63639(10) 0.0206(8) Uani 1 1 d . . . . .
 H12C H 0.839718 0.363065 0.624150 0.025 Uiso 1 1 calc R . . . .
 H12D H 0.971894 0.497800 0.629584 0.025 Uiso 1 1 calc R . . . .

loop_
  _atom_site_aniso_label
  _atom_site_aniso_U_11
  _atom_site_aniso_U_22
  _atom_site_aniso_U_33
  _atom_site_aniso_U_23
  _atom_site_aniso_U_13
  _atom_site_aniso_U_12
 Cl1 0.0234(4) 0.0277(5) 0.0386(5) -0.0056(5) -0.0028(3) -0.0024(4)
 O1 0.0264(12) 0.0160(14) 0.0306(13) 0.0052(12) 0.0026(10) 0.0017(11)
 O2 0.0214(11) 0.0169(13) 0.0205(11) -0.0014(10) -0.0024(10) 0.0055(11)
 N1 0.0181(14) 0.0191(16) 0.0191(14) 0.0018(14) -0.0032(12) -0.0011(13)
 C1 0.0253(16) 0.0207(19) 0.0279(17) -0.0013(17) -0.0009(14) 0.0038(18)
 C2 0.039(2) 0.025(2) 0.033(2) -0.0092(18) -0.0076(18) -0.0001(19)
 C3 0.047(3) 0.027(2) 0.0278(19) -0.0086(18) -0.0015(18) 0.009(2)
 C4 0.0342(18) 0.022(2) 0.0261(17) 0.0025(17) 0.0053(15) 0.0090(19)
 C5 0.0267(18) 0.0173(18) 0.0208(16) 0.0034(15) 0.0005(15) 0.0044(15)
 C6 0.0259(18) 0.0136(17) 0.0197(16) 0.0037(15) -0.0013(14) 0.0026(14)
 C7 0.0168(15) 0.0169(18) 0.0210(16) 0.0002(15) -0.0010(13) 0.0018(14)
 C8 0.0157(16) 0.0178(18) 0.0216(16) 0.0031(14) -0.0054(13) -0.0031(15)
 C9 0.0246(16) 0.0200(18) 0.0185(16) 0.0026(16) 0.0016(14) -0.0021(15)
 C10 0.0205(17) 0.0198(19) 0.0204(16) -0.0018(15) 0.0029(14) 0.0009(15)
 C11 0.0160(16) 0.0176(17) 0.0178(15) -0.0002(15) -0.0024(13) -0.0014(14)
 C12 0.0186(16) 0.0190(18) 0.0166(15) 0.0017(14) -0.0031(14) 0.0018(15)
 Cl1' 0.0256(4) 0.0361(6) 0.0393(5) 0.0091(4) -0.0048(4) -0.0081(4)
 O1' 0.0305(15) 0.060(2) 0.0257(14) 0.0144(15) 0.0034(12) 0.0087(14)
 O2' 0.0213(12) 0.0308(14) 0.0151(11) 0.0021(11) 0.0021(10) -0.0016(11)
 N1' 0.0198(16) 0.051(3) 0.0253(17) -0.0091(17) -0.0029(14) 0.0021(18)
 C1' 0.0202(18) 0.039(2) 0.0238(18) 0.0126(18) 0.0015(14) 0.0024(17)
 C2' 0.0232(19) 0.050(3) 0.038(2) 0.019(2) 0.0044(17) 0.004(2)
 C3' 0.031(2) 0.067(4) 0.037(2) 0.008(3) 0.0103(19) 0.023(2)
 C4' 0.046(3) 0.066(4) 0.038(2) -0.020(3) -0.004(2) 0.020(3)
 C5' 0.031(2) 0.056(3) 0.034(2) -0.019(2) -0.0075(19) 0.008(2)
 C6' 0.0220(18) 0.041(2) 0.0165(16) -0.0011(17) 0.0011(15) 0.0075(18)
 C7' 0.0182(18) 0.034(2) 0.0178(16) -0.0037(15) 0.0005(14) 0.0010(17)
 C8' 0.0219(18) 0.041(3) 0.0216(18) 0.0048(18) -0.0022(14) 0.0045(18)
 C9' 0.055(3) 0.034(2) 0.026(2) 0.0073(19) 0.0035(19) 0.014(2)
 C10' 0.049(2) 0.030(2) 0.0211(19) 0.0015(18) 0.0031(18) 0.013(2)
 C11' 0.0214(16) 0.030(2) 0.0163(15) 0.0000(15) -0.0008(14) 0.0030(17)
 C12' 0.0186(17) 0.025(2) 0.0183(16) -0.0011(15) -0.0009(13) 0.0001(15)

_geom_special_details
;
 All esds (except the esd in the dihedral angle between two l.s. planes)
 are estimated using the full covariance matrix.  The cell esds are taken
 into account individually in the estimation of esds in distances, angles
 and torsion angles; correlations between esds in cell parameters are only
 used when they are defined by crystal symmetry.  An approximate (isotropic)
 treatment of cell esds is used for estimating esds involving l.s. planes.
;
loop_
  _geom_bond_atom_site_label_1
  _geom_bond_atom_site_label_2
  _geom_bond_distance
  _geom_bond_site_symmetry_2
  _geom_bond_publ_flag
 Cl1 C1 1.759(4) . ?
 O1 C8 1.211(5) . ?
 O2 H2 0.92(3) . ?
 O2 C11 1.434(4) . ?
 N1 H1A 0.92(2) . ?
 N1 H1B 0.92(2) . ?
 N1 C7 1.479(4) . ?
 C1 C2 1.392(6) . ?
 C1 C6 1.393(5) . ?
 C2 H2A 0.9500 . ?
 C2 C3 1.379(7) . ?
 C3 H3 0.9500 . ?
 C3 C4 1.382(6) . ?
 C4 H4 0.9500 . ?
 C4 C5 1.390(5) . ?
 C5 H5 0.9500 . ?
 C5 C6 1.392(5) . ?
 C6 C7 1.534(5) . ?
 C7 C8 1.555(5) . ?
 C7 C12 1.546(5) . ?
 C8 C9 1.499(5) . ?
 C9 H9A 0.9900 . ?
 C9 H9B 0.9900 . ?
 C9 C10 1.530(5) . ?
 C10 H10A 0.9900 . ?
 C10 H10B 0.9900 . ?
 C10 C11 1.512(5) . ?
 C11 H11 1.0000 . ?
 C11 C12 1.522(5) . ?
 C12 H12A 0.9900 . ?
 C12 H12B 0.9900 . ?
 Cl1' C1' 1.755(5) . ?
 O1' C8' 1.213(5) . ?
 O2' H2' 0.93(2) . ?
 O2' C11' 1.429(4) . ?
 N1' H1'A 0.93(2) . ?
 N1' H1'B 0.92(3) . ?
 N1' C7' 1.477(5) . ?
 C1' C2' 1.374(6) . ?
 C1' C6' 1.405(6) . ?
 C2' H2'A 0.9500 . ?
 C2' C3' 1.382(8) . ?
 C3' H3' 0.9500 . ?
 C3' C4' 1.370(8) . ?
 C4' H4' 0.9500 . ?
 C4' C5' 1.388(7) . ?
 C5' H5' 0.9500 . ?
 C5' C6' 1.376(7) . ?
 C6' C7' 1.520(5) . ?
 C7' C8' 1.542(6) . ?
 C7' C12' 1.535(5) . ?
 C8' C9' 1.509(6) . ?
 C9' H9'A 0.9900 . ?
 C9' H9'B 0.9900 . ?
 C9' C10' 1.536(5) . ?
 C10' H10C 0.9900 . ?
 C10' H10D 0.9900 . ?
 C10' C11' 1.531(6) . ?
 C11' H11' 1.0000 . ?
 C11' C12' 1.514(5) . ?
 C12' H12C 0.9900 . ?
 C12' H12D 0.9900 . ?

loop_
  _geom_angle_atom_site_label_1
  _geom_angle_atom_site_label_2
  _geom_angle_atom_site_label_3
  _geom_angle
  _geom_angle_site_symmetry_1
  _geom_angle_site_symmetry_3
  _geom_angle_publ_flag
 C11 O2 H2 106(3) . . ?
 H1A N1 H1B 103(4) . . ?
 C7 N1 H1A 109(3) . . ?
 C7 N1 H1B 111(3) . . ?
 C2 C1 Cl1 115.9(3) . . ?
 C2 C1 C6 122.6(4) . . ?
 C6 C1 Cl1 121.5(3) . . ?
 C1 C2 H2A 120.4 . . ?
 C3 C2 C1 119.3(4) . . ?
 C3 C2 H2A 120.4 . . ?
 C2 C3 H3 120.2 . . ?
 C2 C3 C4 119.7(4) . . ?
 C4 C3 H3 120.2 . . ?
 C3 C4 H4 119.9 . . ?
 C3 C4 C5 120.2(4) . . ?
 C5 C4 H4 119.9 . . ?
 C4 C5 H5 119.2 . . ?
 C4 C5 C6 121.6(4) . . ?
 C6 C5 H5 119.2 . . ?
 C1 C6 C7 122.4(3) . . ?
 C5 C6 C1 116.6(3) . . ?
 C5 C6 C7 120.9(3) . . ?
 N1 C7 C6 113.6(3) . . ?
 N1 C7 C8 101.5(3) . . ?
 N1 C7 C12 108.8(3) . . ?
 C6 C7 C8 110.9(3) . . ?
 C6 C7 C12 108.9(3) . . ?
 C12 C7 C8 113.0(3) . . ?
 O1 C8 C7 120.4(3) . . ?
 O1 C8 C9 122.2(3) . . ?
 C9 C8 C7 117.1(3) . . ?
 C8 C9 H9A 108.8 . . ?
 C8 C9 H9B 108.8 . . ?
 C8 C9 C10 113.6(3) . . ?
 H9A C9 H9B 107.7 . . ?
 C10 C9 H9A 108.8 . . ?
 C10 C9 H9B 108.8 . . ?
 C9 C10 H10A 109.5 . . ?
 C9 C10 H10B 109.5 . . ?
 H10A C10 H10B 108.1 . . ?
 C11 C10 C9 110.8(3) . . ?
 C11 C10 H10A 109.5 . . ?
 C11 C10 H10B 109.5 . . ?
 O2 C11 C10 110.9(3) . . ?
 O2 C11 H11 109.4 . . ?
 O2 C11 C12 106.5(3) . . ?
 C10 C11 H11 109.4 . . ?
 C10 C11 C12 111.1(3) . . ?
 C12 C11 H11 109.4 . . ?
 C7 C12 H12A 108.4 . . ?
 C7 C12 H12B 108.4 . . ?
 C11 C12 C7 115.7(3) . . ?
 C11 C12 H12A 108.4 . . ?
 C11 C12 H12B 108.4 . . ?
 H12A C12 H12B 107.4 . . ?
 C11' O2' H2' 105(3) . . ?
 H1'A N1' H1'B 110(5) . . ?
 C7' N1' H1'A 110(4) . . ?
 C7' N1' H1'B 106(4) . . ?
 C2' C1' Cl1' 116.6(3) . . ?
 C2' C1' C6' 122.4(4) . . ?
 C6' C1' Cl1' 120.9(3) . . ?
 C1' C2' H2'A 120.2 . . ?
 C1' C2' C3' 119.6(4) . . ?
 C3' C2' H2'A 120.2 . . ?
 C2' C3' H3' 120.1 . . ?
 C4' C3' C2' 119.8(4) . . ?
 C4' C3' H3' 120.1 . . ?
 C3' C4' H4' 120.3 . . ?
 C3' C4' C5' 119.5(5) . . ?
 C5' C4' H4' 120.3 . . ?
 C4' C5' H5' 118.5 . . ?
 C6' C5' C4' 123.0(5) . . ?
 C6' C5' H5' 118.5 . . ?
 C1' C6' C7' 122.7(4) . . ?
 C5' C6' C1' 115.6(4) . . ?
 C5' C6' C7' 121.7(4) . . ?
 N1' C7' C6' 113.9(3) . . ?
 N1' C7' C8' 101.2(3) . . ?
 N1' C7' C12' 107.3(3) . . ?
 C6' C7' C8' 111.7(3) . . ?
 C6' C7' C12' 109.8(3) . . ?
 C12' C7' C8' 112.7(3) . . ?
 O1' C8' C7' 121.0(4) . . ?
 O1' C8' C9' 121.1(4) . . ?
 C9' C8' C7' 117.2(3) . . ?
 C8' C9' H9'A 108.7 . . ?
 C8' C9' H9'B 108.7 . . ?
 C8' C9' C10' 114.2(4) . . ?
 H9'A C9' H9'B 107.6 . . ?
 C10' C9' H9'A 108.7 . . ?
 C10' C9' H9'B 108.7 . . ?
 C9' C10' H10C 109.7 . . ?
 C9' C10' H10D 109.7 . . ?
 H10C C10' H10D 108.2 . . ?
 C11' C10' C9' 110.0(4) . . ?
 C11' C10' H10C 109.7 . . ?
 C11' C10' H10D 109.7 . . ?
 O2' C11' C10' 111.0(3) . . ?
 O2' C11' H11' 108.7 . . ?
 O2' C11' C12' 110.2(3) . . ?
 C10' C11' H11' 108.7 . . ?
 C12' C11' C10' 109.4(3) . . ?
 C12' C11' H11' 108.7 . . ?
 C7' C12' H12C 108.7 . . ?
 C7' C12' H12D 108.7 . . ?
 C11' C12' C7' 114.4(3) . . ?
 C11' C12' H12C 108.7 . . ?
 C11' C12' H12D 108.7 . . ?
 H12C C12' H12D 107.6 . . ?

loop_
  _geom_hbond_atom_site_label_D
  _geom_hbond_atom_site_label_H
  _geom_hbond_atom_site_label_A
  _geom_hbond_distance_DH
  _geom_hbond_distance_HA
  _geom_hbond_distance_DA
  _geom_hbond_angle_DHA
  _geom_hbond_site_symmetry_A
 O2 H2 N1 0.92(3) 1.95(3) 2.850(4) 169(5) 4_556
 N1 H1A O2' 0.92(2) 2.16(3) 3.065(4) 164(4) 1_455
 N1 H1B O1 0.92(2) 2.35(3) 3.251(4) 165(4) 4_466
 O2' H2' O2 0.93(2) 1.89(3) 2.812(4) 172(4) .
 N1' H1'A O1' 0.93(2) 2.49(5) 3.134(5) 126(4) 3_756

_shelx_res_file
;
TITL NIH29 in P2(1)2(1)2(1)
    nih29.res
    created by SHELXL-2016/6 at 10:27:44 on 05-May-2017
REM SHELXT solution in P2(1)2(1)2(1)
REM R1 0.099, Rweak 0.025, Alpha 0.002, Orientation as input
REM Flack x = 0.002 ( 0.011 ) from Parsons' quotients
REM Formula found by SHELXT: C24 N O5 Cl2
CELL 1.54178 8.1094 8.6923 33.1247 90 90 90
ZERR 8 0.0002 0.0002 0.0007 0 0 0
LATT -1
SYMM 0.5-X,-Y,0.5+Z
SYMM -X,0.5+Y,0.5-Z
SYMM 0.5+X,0.5-Y,-Z
SFAC C H Cl N O
UNIT 96 112 8 8 16
EQIV $1 0.5+X,0.5-Y,1-Z
EQIV $2 -0.5+X,1.5-Y,1-Z
EQIV $3 -1+X,+Y,+Z
EQIV $4 2-X,0.5+Y,1.5-Z
DFIX 0.95 N1 H1a N1 H1b O2 H2 O2' H2' N1' H1'b N1' H1'a

L.S. 10
PLAN  20
SIZE 0.113 0.057 0.016
TEMP -173.15
HTAB O2 N1_$1
HTAB O2' O2
HTAB N1 O1_$2
HTAB N1 O2'_$3
HTAB N1' O1'_$4
BOND $H
list 4
fmap 2
ACta 136
REM <olex2.extras>
REM <HklSrc "%.\\NIH29.hkl">
REM </olex2.extras>

WGHT    0.058100
FVAR       0.58899
CL1   3    0.782068    0.744881    0.576095    11.00000    0.02340    0.02766 =
         0.03859   -0.00560   -0.00281   -0.00244
O1    5    0.535984    0.776349    0.502347    11.00000    0.02638    0.01598 =
         0.03056    0.00521    0.00258    0.00168
O2    5    0.782400    0.213059    0.542163    11.00000    0.02141    0.01694 =
         0.02045   -0.00141   -0.00237    0.00555
H2    2    0.804243    0.138020    0.523431    11.00000    0.04433
N1    4    0.332256    0.492223    0.523821    11.00000    0.01815    0.01909 =
         0.01909    0.00176   -0.00324   -0.00115
H1A   2    0.274858    0.434175    0.542531    11.00000    0.01941
H1B   2    0.261132    0.571689    0.518064    11.00000    0.02286
C1    1    0.581032    0.744410    0.596012    11.00000    0.02528    0.02065 =
         0.02787   -0.00126   -0.00092    0.00384
C2    1    0.555707    0.836932    0.629732    11.00000    0.03907    0.02538 =
         0.03285   -0.00918   -0.00764   -0.00012
AFIX  43
H2A   2    0.643954    0.895326    0.640731    11.00000   -1.20000
AFIX   0
C3    1    0.401075    0.842933    0.647013    11.00000    0.04650    0.02725 =
         0.02784   -0.00855   -0.00151    0.00943
AFIX  43
H3    2    0.381877    0.906196    0.669922    11.00000   -1.20000
AFIX   0
C4    1    0.274172    0.756456    0.630838    11.00000    0.03421    0.02233 =
         0.02610    0.00254    0.00528    0.00897
AFIX  43
H4    2    0.167603    0.760189    0.642707    11.00000   -1.20000
AFIX   0
C5    1    0.301960    0.664038    0.597261    11.00000    0.02671    0.01734 =
         0.02078    0.00344    0.00050    0.00443
AFIX  43
H5    2    0.213723    0.604524    0.586679    11.00000   -1.20000
AFIX   0
C6    1    0.455871    0.656572    0.578771    11.00000    0.02593    0.01359 =
         0.01968    0.00367   -0.00126    0.00263
C7    1    0.485708    0.550489    0.542504    11.00000    0.01684    0.01685 =
         0.02097    0.00021   -0.00103    0.00182
C8    1    0.564328    0.640650    0.506808    11.00000    0.01566    0.01776 =
         0.02159    0.00306   -0.00543   -0.00307
C9    1    0.660595    0.549419    0.476490    11.00000    0.02461    0.02005 =
         0.01850    0.00256    0.00156   -0.00212
AFIX  23
H9A   2    0.728779    0.620838    0.460261    11.00000   -1.20000
H9B   2    0.582542    0.497803    0.457925    11.00000   -1.20000
AFIX   0
C10   1    0.772978    0.427934    0.495436    11.00000    0.02052    0.01982 =
         0.02043   -0.00181    0.00290    0.00086
AFIX  23
H10A  2    0.826242    0.366887    0.473836    11.00000   -1.20000
H10B  2    0.860770    0.479362    0.511222    11.00000   -1.20000
AFIX   0
C11   1    0.675852    0.322042    0.522749    11.00000    0.01600    0.01758 =
         0.01780   -0.00021   -0.00240   -0.00140
AFIX  13
H11   2    0.591129    0.265896    0.506498    11.00000   -1.20000
AFIX   0
C12   1    0.591045    0.411866    0.556299    11.00000    0.01864    0.01905 =
         0.01662    0.00171   -0.00305    0.00177
AFIX  23
H12A  2    0.676567    0.449688    0.575177    11.00000   -1.20000
H12B  2    0.519200    0.340297    0.571503    11.00000   -1.20000
AFIX   0

CL1'  3    0.588075    0.229633    0.662866    11.00000    0.02563    0.03610 =
         0.03931    0.00910   -0.00484   -0.00809
O1'   5    0.873457    0.168723    0.728579    11.00000    0.03055    0.06041 =
         0.02574    0.01439    0.00343    0.00869
O2'   5    1.084442    0.311057    0.574996    11.00000    0.02126    0.03077 =
         0.01511    0.00208    0.00213   -0.00157
H2'   2    0.979617    0.285140    0.565773    11.00000    0.03442
N1'   4    1.087321    0.434855    0.700047    11.00000    0.01978    0.05131 =
         0.02533   -0.00906   -0.00288    0.00211
H1'A  2    1.077647    0.439112    0.727970    11.00000    0.04355
H1'B  2    1.100961    0.532684    0.689843    11.00000    0.04743
C1'   1    0.619048    0.401535    0.689587    11.00000    0.02016    0.03889 =
         0.02379    0.01264    0.00146    0.00241
C2'   1    0.480064    0.476404    0.702918    11.00000    0.02320    0.05024 =
         0.03753    0.01931    0.00436    0.00379
AFIX  43
H2'A  2    0.373926    0.435184    0.697409    11.00000   -1.20000
AFIX   0
C3'   1    0.495546    0.612012    0.724386    11.00000    0.03068    0.06714 =
         0.03697    0.00770    0.01029    0.02251
AFIX  43
H3'   2    0.400139    0.663287    0.734181    11.00000   -1.20000
AFIX   0
C4'   1    0.648920    0.672186    0.731486    11.00000    0.04642    0.06609 =
         0.03756   -0.02012   -0.00394    0.01959
AFIX  43
H4'   2    0.660488    0.766084    0.745886    11.00000   -1.20000
AFIX   0
C5'   1    0.787289    0.594895    0.717475    11.00000    0.03119    0.05640 =
         0.03383   -0.01862   -0.00749    0.00809
AFIX  43
H5'   2    0.892731    0.638892    0.722258    11.00000   -1.20000
AFIX   0
C6'   1    0.778749    0.457407    0.696967    11.00000    0.02197    0.04095 =
         0.01650   -0.00107    0.00114    0.00747
C7'   1    0.932915    0.374731    0.682444    11.00000    0.01822    0.03432 =
         0.01777   -0.00369    0.00046    0.00099
C8'   1    0.937272    0.206290    0.696971    11.00000    0.02186    0.04134 =
         0.02164    0.00484   -0.00218    0.00449
C9'   1    1.045875    0.096127    0.673862    11.00000    0.05478    0.03362 =
         0.02605    0.00734    0.00347    0.01382
AFIX  23
H9'A  2    1.010397   -0.010371    0.679929    11.00000   -1.20000
H9'B  2    1.160738    0.107687    0.683521    11.00000   -1.20000
AFIX   0
C10'  1    1.043097    0.119509    0.627904    11.00000    0.04887    0.02994 =
         0.02112    0.00153    0.00308    0.01321
AFIX  23
H10C  2    1.127060    0.052712    0.615118    11.00000   -1.20000
H10D  2    0.933634    0.090221    0.617133    11.00000   -1.20000
AFIX   0
C11'  1    1.078870    0.288034    0.617696    11.00000    0.02145    0.02981 =
         0.01625   -0.00005   -0.00080    0.00298
AFIX  13
H11'  2    1.188295    0.316707    0.629405    11.00000   -1.20000
AFIX   0
C12'  1    0.947493    0.389260    0.636390    11.00000    0.01861    0.02502 =
         0.01828   -0.00106   -0.00086    0.00005
AFIX  23
H12C  2    0.839718    0.363065    0.624150    11.00000   -1.20000
H12D  2    0.971894    0.497800    0.629584    11.00000   -1.20000
AFIX   0
HKLF 4


REM  NIH29 in P2(1)2(1)2(1)
REM R1 =  0.0408 for    3706 Fo > 4sig(Fo)  and  0.0501 for all    4251 data
REM    313 parameters refined using      6 restraints

END

WGHT      0.0581      0.0000

REM Highest difference peak  0.355,  deepest hole -0.335,  1-sigma level  0.052
Q1    1   0.5874  0.3095  0.6811  11.00000  0.05    0.36
Q2    1   0.7984  0.6255  0.5736  11.00000  0.05    0.24
Q3    1   0.8554  0.4159  0.6893  11.00000  0.05    0.22
Q4    1   0.8551  0.7366  0.6039  11.00000  0.05    0.22
Q5    1   0.6064  0.1185  0.6788  11.00000  0.05    0.21
Q6    1   0.7939  0.8747  0.5743  11.00000  0.05    0.21
Q7    1   0.4753  0.2239  0.6633  11.00000  0.05    0.21
Q8    1   0.8952 -0.0592  0.6975  11.00000  0.05    0.21
Q9    1   0.5853  0.0935  0.6665  11.00000  0.05    0.20
Q10   1   0.6987  0.7582  0.5925  11.00000  0.05    0.20
Q11   1   0.5247  0.7896  0.5846  11.00000  0.05    0.20
Q12   1   0.7200  0.3844  0.5082  11.00000  0.05    0.19
Q13   1   0.6725  0.8094  0.7284  11.00000  0.05    0.18
Q14   1   0.2255  0.6470  0.5767  11.00000  0.05    0.18
Q15   1   0.6129  0.7126  0.5112  11.00000  0.05    0.18
Q16   1   0.4679  0.7423  0.7283  11.00000  0.05    0.18
Q17   1   0.7887  0.5574  0.6921  11.00000  0.05    0.17
Q18   1   0.8736  0.7023  0.5930  11.00000  0.05    0.17
Q19   1   0.3760  0.6414  0.5877  11.00000  0.05    0.17
Q20   1   0.6177  0.5865  0.4919  11.00000  0.05    0.17
;
_shelx_res_checksum               92635
_shelx_hkl_file
;
   1   0   0    5.00    4.00
  -1   0   0    2.60    4.10
   2   0   0 1843.32   43.00
  -2   0   0 1855.11   42.10
   3   0   0    9.70    8.50
  -3   0   0  -10.10    7.30
   4   0   0   20.40   12.30
   5   0   0  -12.40   10.70
  -6   0   0 1483.55   35.50
  -6   0   0 1520.05   39.10
  -7   0   0   -5.70    9.20
  -7   0   0    4.00   12.90
   8   0   0  383.76   17.00
  -8   0   0  409.16   19.20
  -9   0   0   -4.10    9.10
   9   0   0    3.70    6.60
   0  -1   0    3.70    3.40
  -1   1   0 1149.08   26.50
   1  -1   0 1133.69   29.10
   1   1   0 1180.28   24.80
  -2   1   0 1518.45   35.40
   2  -1   0 1586.14   39.90
   2   1   0 1509.65   34.60
  -3   1   0   66.49   11.20
   3  -1   0   65.29   12.40
   4  -1   0  -11.90   11.30
   4   1   0   10.90   10.10
   5  -1   0    1.20   14.10
   6  -1   0   36.40    7.70
  -6  -1   0   14.20    7.90
  -6   1   0   23.60   13.80
  -6  -1   0   35.00    9.90
  -6   1   0   31.40    8.50
  -7   1   0   -2.80   13.40
  -7   1   0   14.70   10.30
  -7  -1   0   17.80   10.60
  -7  -1   0    4.60   10.80
   7  -1   0   11.00    8.20
  -8   1   0  894.11   25.80
   8  -1   0  894.71   25.10
  -8   1   0  898.21   32.00
  -8  -1   0  835.42   27.10
   9   1   0    7.90    6.90
   9  -1   0    4.20    6.40
  -9   1   0   -2.80   13.00
  -9   1   0   -1.00    7.90
  -9  -1   0   -1.00    8.60
   0  -2   0 9999.00  203.68
   1   2   0  129.49   12.80
   1  -2   0  110.99   14.50
  -2   2   0   50.69    8.40
   2   2   0   29.30    9.00
   2   2   0   30.10    4.00
   2  -2   0   47.00   11.90
   3   2   0  259.87   14.10
   3  -2   0  321.47   24.30
  -3   2   0  272.57   13.80
   4  -2   0   14.00   12.90
   5  -2   0   14.10   15.10
  -6  -2   0 1312.07   34.00
  -6  -2   0 1288.67   32.30
  -6   2   0 1306.97   37.30
   6  -2   0 1274.87   31.20
  -7  -2   0   62.09   11.40
  -7  -2   0   68.39   11.40
  -7   2   0   60.99   16.50
   7  -2   0   38.90    7.60
  -8  -2   0  199.78   17.70
  -8   2   0  207.88   24.70
   8  -2   0  168.48   12.70
  -8  -2   0  237.98   17.20
   9   2   0   14.20    7.10
   9  -2   0   15.60    5.80
  -9  -2   0   20.40    9.00
  -9   2   0   20.10   14.50
   0   3   0   -2.50   10.70
   0  -3   0    3.90    7.90
   1   3   0  166.78   16.00
   1  -3   0  155.88   15.00
  -1   3   0  171.18   14.20
   2   3   0  141.09   16.10
   2  -3   0  156.48   21.70
  -2   3   0  135.29   13.10
  -2   3   0  152.88   14.00
   3   3   0  -11.00   11.00
   3  -3   0   10.40   13.00
   4  -3   0  376.76   30.40
  -5   3   0  154.58   16.90
   5  -3   0  127.49   10.40
  -5  -3   0  134.89   15.50
  -5  -3   0  112.89   11.60
   5  -3   0  119.49   20.20
   6  -3   0   96.89   11.10
  -6  -3   0   68.69   10.30
  -6  -3   0   66.79   11.10
  -6   3   0   90.99   14.00
  -7  -3   0   91.89   12.60
  -7  -3   0  106.69   16.00
   7  -3   0  100.09   12.10
  -7   3   0  137.79   24.60
  -8  -3   0  350.66   19.60
  -8  -3   0  304.87   22.20
  -8   3   0  331.87   25.90
   8  -3   0  382.66   14.60
   9  -3   0   14.80    4.80
   9   3   0   12.80    6.10
  -9   3   0   14.80   13.40
  -9  -3   0   13.30    9.10
  -9  -3   0   14.30    8.20
   0  -4   0  562.54   23.30
   0   4   0  563.74   25.30
  -1   4   0   -1.00   11.80
   1  -4   0  -13.00   11.10
   1   4   0   13.90   12.30
   2  -4   0  936.51   34.60
   2   4   0  974.20   35.30
  -2   4   0  998.30   32.10
  -2   4   0  970.60   31.00
   3  -4   0   -1.60   12.10
   3   4   0    8.60   13.00
   4  -4   0  133.59   20.80
  -5  -4   0  443.66   17.30
  -5   4   0  456.35   22.50
  -5  -4   0  454.05   21.10
   5  -4   0  406.26   15.80
   6  -4   0   83.19   12.10
  -6   4   0   57.79   15.00
  -6  -4   0   61.39   11.20
  -6  -4   0   63.49   12.80
   7  -4   0    5.80    7.40
  -7  -4   0    3.20   12.70
  -7  -4   0   -3.20    9.90
  -7   4   0    2.10   14.70
  -8  -4   0   -7.00    8.90
   8  -4   0    5.50    6.10
  -8   4   0   -8.80   14.80
  -8  -4   0   11.60   11.40
   9   4   0    5.90    8.70
  -9  -4   0    4.30   10.50
  -9   4   0    4.70   11.70
   0   5   0   -4.00   15.30
   1   5   0 1608.34   50.49
  -1   5   0 1660.23   48.10
  -1   5   0 1729.43   50.29
   1  -5   0 1541.45   47.50
   2   5   0  161.68   27.20
  -2   5   0  155.68   21.00
   2  -5   0  163.38   24.60
   3  -5   0 1342.27   48.50
   3   5   0 1333.57   47.90
  -4  -5   0  127.99   14.60
   4  -5   0  114.29   11.00
  -4   5   0  147.19   17.00
  -5   5   0  488.65   25.50
   5  -5   0  523.25   17.30
  -5  -5   0  489.15   22.50
  -6  -5   0    3.40   10.10
   6  -5   0    1.10    7.30
  -6  -5   0    4.20   12.50
  -6   5   0  -12.30   14.00
   7  -5   0    0.90    6.80
  -7   5   0    3.20   14.00
  -7  -5   0    4.90   10.10
  -7  -5   0   -9.40   12.20
  -8  -5   0  270.77   14.00
  -8   5   0  230.78   23.90
   8  -5   0  270.77   10.60
  -8  -5   0  262.37   16.30
   0   6   0  771.72   38.50
   1   6   0   53.39   22.20
  -1   6   0   32.40   13.90
  -1   6   0   52.59   20.20
  -1  -6   0   44.70    7.50
   1  -6   0   33.70    7.20
  -2  -6   0   83.29   10.60
   2   6   0   92.99   22.50
  -2   6   0   94.09   18.50
   2  -6   0   81.39   10.10
   3   6   0   49.40   24.10
   3  -6   0   69.79   10.50
   4  -6   0  268.37   13.60
  -4  -6   0  298.67   17.50
  -5   6   0  342.77   24.50
  -5  -6   0  297.87   19.10
   5  -6   0  298.57   13.80
   6  -6   0  493.05   16.90
  -6   6   0  446.76   26.20
  -6  -6   0  536.05   24.00
  -7  -6   0   -1.80   10.80
  -7   6   0  -12.70   13.20
   7  -6   0    2.00    5.50
  -8  -6   0   12.20    8.60
   0   7   0    3.40   22.00
   0  -7   0    5.10    8.00
  -1  -7   0   -1.10    8.70
  -1   7   0   16.80   20.20
   1  -7   0   12.80    7.70
   1   7   0   20.00   24.70
  -2   7   0  166.18   30.30
  -2  -7   0  167.48   11.40
   2  -7   0  149.09   12.30
   2   7   0  100.29   27.40
  -3   7   0  668.73   25.50
   3   7   0  695.43   43.70
   3  -7   0  697.93   21.10
   4  -7   0   85.09   11.70
   5  -7   0  166.88   12.40
  -6  -7   0   38.50    9.90
   6  -7   0   40.90    6.90
  -7  -7   0   26.70    8.00
   0   8   0  213.78   32.10
   0  -8   0  183.88   13.60
   1   8   0   26.60   23.10
  -1  -8   0    2.50    9.10
  -1   8   0   39.80   23.90
   1  -8   0    3.10    8.00
  -2  -8   0   13.50    8.40
  -2   8   0  -10.00   12.50
   2  -8   0   -5.50    7.50
   2   8   0   11.70   12.40
   3  -8   0    7.50    7.90
  -3   8   0   -4.30   11.70
   4  -8   0   62.99   10.80
   5  -8   0  278.47   12.30
   6   8   0   52.99    6.80
   0  -9   0    3.80    8.20
   0   9   0   -3.90   12.40
  -1   9   0    5.40   11.90
   1  -9   0   29.50    7.90
   1   9   0   12.40   11.80
  -1  -9   0   40.20    8.50
   2  -9   0   39.60    7.60
  -2   9   0   15.30   11.20
   2   9   0   38.80   10.40
   3  -9   0    4.40    6.90
  -3   9   0   13.40   11.30
   4  -9   0  112.39    9.40
   4   9   0   96.29   19.80
   0  10   0  155.98   15.90
   1 -10   0   22.30    5.40
   1  10   0   31.20   10.40
  -1  10   0   32.40   11.00
  -2  10   0   37.20   10.00
   2  10   0   79.79   14.00
   2 -10   0   41.50    6.90
   2  10   0   14.50   13.50
   0   0   1    0.70    1.00
   0   0  -1   -1.40    1.10
   1   0   1   11.30    4.70
  -1   0  -1    9.40    3.70
  -1   0   1   11.50    4.80
   1   0  -1   15.10    4.90
  -2   0   1 1523.25   36.00
  -2   0  -1 1411.16   34.20
   2   0   1 1543.15   37.00
   2   0  -1 1500.05   36.10
   3   0   1  129.29   16.20
  -3   0  -1   88.79   10.00
  -3   0   1  100.99   13.30
   3   0  -1   92.39   13.70
  -4   0   1 4947.71  109.39
   4   0   1 5021.40  111.39
   4   0  -1 5012.40  111.59
   5   0   1   52.39   14.10
   5   0  -1   72.59   14.60
  -6   0  -1  728.03   26.30
  -6   0  -1  740.43   22.40
  -6   0   1  707.53   21.90
  -6   0   1  705.73   25.90
  -7   0  -1  319.07   23.40
  -7   0   1  326.37   16.20
  -7   0  -1  328.47   17.80
  -7   0   1  353.66   23.00
  -8   0  -1   45.30   10.50
  -8   0   1   54.59   12.00
  -8   0  -1   34.70   24.40
   8   0  -1   52.99    9.60
   8   0   1   42.30    9.20
   9   0  -1   10.70    6.70
  -9   0   1    8.20    9.50
   9   0   1    4.10    6.30
  -9   0  -1   20.80    8.90
   0  -1   1    5.00    3.70
   0  -1  -1    3.70    4.60
  -1   1   1 1771.62   39.50
   1  -1   1 1785.62   40.90
   1   1  -1 1811.52   36.30
  -1   1  -1 1791.92   39.10
   1  -1  -1 1893.21   42.40
   2  -1   1  228.08   17.00
  -2   1   1  243.28   13.70
   2   1  -1  247.58   10.70
   2  -1  -1  219.38   20.00
  -2   1  -1  200.18   10.40
   2   1   1  215.08   10.90
  -2  -1   1  203.58   16.10
   3   1  -1  860.51   24.60
   3  -1   1  806.12   29.10
  -3   1   1  821.92   24.80
   3   1   1  885.81   26.00
  -3   1  -1  919.61   24.30
   3  -1  -1  901.71   32.40
   4  -1   1 1053.69   36.80
   4   1  -1 1135.39   42.10
   4  -1  -1 1016.60   35.50
   4   1   1 1073.99   31.80
   5  -1   1  173.58   25.20
   5  -1  -1  153.68   24.10
  -6  -1  -1  672.23   22.60
  -6   1   1  709.03   25.30
   6  -1   1  696.53   19.70
  -6  -1  -1  701.83   20.90
  -6   1   1  700.53   21.20
  -6  -1   1  650.83   22.10
  -6   1  -1  687.13   26.50
  -6   1  -1  636.44   20.50
   6  -1  -1  668.93   19.80
  -6  -1   1  669.73   21.80
  -7  -1  -1  174.08   16.20
  -7   1   1  162.38   22.70
  -7  -1  -1  164.68   16.40
  -7   1   1  140.09   15.50
   7  -1   1  163.68   11.90
  -7   1  -1  183.28   22.40
   7  -1  -1  181.18   13.90
  -7  -1   1  201.38   16.10
  -7   1  -1  179.28   15.30
  -7  -1   1  192.18   17.40
   8  -1   1   44.60    8.80
  -8  -1  -1   63.39   11.50
  -8   1   1   46.00   15.50
  -8   1   1   57.09   10.80
  -8   1  -1   40.90   10.50
   8  -1  -1   53.19    9.00
  -8   1  -1   35.80   16.60
   9  -1   1   34.20    6.60
   9   1  -1   41.80    7.70
  -9   1   1   57.79   14.20
  -9  -1  -1   32.30    9.60
  -9   1   1   45.80    9.10
   9   1   1   47.50    7.60
  -9   1  -1   36.10    8.60
  -9  -1   1   35.50    9.70
  -9   1  -1   41.50   15.10
   9  -1  -1   28.20    6.90
   0   2  -1   62.29   11.00
   0  -2  -1   90.49   10.80
   0  -2   1   79.59   11.40
  -1   2   1  412.26   17.50
   1  -2   1  430.16   18.90
   1   2  -1  413.16   17.30
  -1   2  -1  498.25   19.80
   1  -2  -1  506.75   21.40
   2  -2   1  645.24   25.30
  -2   2   1  647.34   21.30
   2   2  -1  644.04   21.50
   2   2   1  610.74   20.40
  -2   2  -1  633.84   19.00
   2  -2  -1  638.14   24.50
   2   2   1  624.04   16.80
   3   2  -1    7.00    9.20
  -3   2   1   23.90    8.40
   3  -2   1   22.70   12.60
   3   2   1    0.90    8.30
  -3   2  -1   26.30    7.00
   3  -2  -1   24.80   11.70
   4  -2   1 1815.22   53.79
   4  -2  -1 1756.52   54.19
   5  -2   1  372.66   30.60
   5  -2  -1  287.27   25.70
  -6  -2  -1  206.88   14.40
  -6  -2  -1  213.18   16.20
  -6   2   1  195.98   17.40
  -6   2   1  198.48   21.90
   6  -2   1  230.28   13.00
   6  -2  -1  282.97   12.90
  -6   2  -1  258.47   20.80
  -6  -2   1  289.27   17.90
  -6  -2   1  268.77   15.00
  -7   2   1  224.88   18.60
  -7  -2  -1  232.88   19.80
   7  -2   1  228.18   12.70
  -7   2   1  205.28   24.60
  -7  -2  -1  212.98   16.10
  -7  -2   1  211.68   17.60
  -7  -2   1  193.68   18.10
   7  -2  -1  190.58   12.70
  -7   2  -1  182.88   22.70
  -8  -2  -1  150.88   19.00
  -8   2   1  132.39   18.20
  -8  -2  -1  148.09   16.30
   8  -2   1  125.39   12.50
  -8   2  -1  103.79   17.00
   8  -2  -1  129.29   12.70
  -8  -2   1  123.59   16.50
  -8  -2   1  150.38   19.10
  -9  -2  -1   35.60    9.00
  -9   2   1   36.50   14.20
   9   2  -1   33.90    7.50
   9  -2   1   54.99    8.90
   9  -2  -1   33.70    6.60
  -9   2  -1   29.50   14.30
  -9  -2   1   20.80    9.40
   9   2   1   43.80    7.40
   0  -3  -1 1280.37   33.40
   0   3  -1 1232.88   35.20
   0  -3   1 1299.57   33.70
   1  -3   1  444.86   22.30
   1   3  -1  395.26   18.80
  -1   3  -1  382.26   18.30
   1   3   1  423.26   20.10
   1  -3  -1  405.06   20.00
  -2   3   1  477.35   20.60
   2  -3   1  480.75   23.90
   2   3  -1  460.75   20.70
  -2   3   1  451.25   19.30
  -2   3  -1  362.66   17.90
   2   3   1  356.46   20.40
   2  -3  -1  379.46   22.20
  -2   3  -1  382.46   16.00
  -3   3   1  201.58   16.00
   3   3  -1  178.48   17.30
   3  -3   1  177.48   20.90
   3  -3  -1  186.48   20.50
   3   3   1  212.08   18.90
   4  -3   1  432.96   28.30
   4  -3  -1  422.16   26.50
  -5   3   1  113.19   14.00
   5  -3   1  142.09   21.00
  -5  -3  -1  109.29   11.10
  -5  -3  -1  129.39   13.70
  -5   3  -1  131.19   18.10
  -5  -3   1  138.29   16.70
  -5  -3   1  138.89   11.80
   5  -3  -1  109.79   19.20
   5  -3  -1  137.89   10.90
  -6   3   1   74.79   14.20
   6  -3   1  110.19   11.30
  -6  -3  -1   86.49   13.10
  -6  -3  -1   95.19   15.20
  -6  -3   1   86.19   13.10
   6  -3  -1  111.09   11.50
  -6  -3   1   93.49   12.60
  -6   3  -1   64.99   14.60
  -7  -3  -1   35.20   12.40
  -7  -3  -1   36.10   10.30
   7  -3   1   25.70    7.50
  -7   3   1   20.60   15.50
  -7  -3   1   12.50   11.50
   7  -3  -1   11.30    7.80
  -7  -3   1    6.10   10.90
  -7   3  -1    9.80   15.00
  -8  -3  -1   14.30   11.40
  -8   3   1  -14.80   16.30
  -8  -3  -1   13.10   10.10
   8  -3   1   -3.00    6.80
  -8  -3   1   31.80   10.80
  -8  -3   1    3.50   12.00
   8  -3  -1   17.70    7.50
  -8   3  -1   12.30   15.60
   9  -3   1   25.20    5.00
  -9  -3  -1   33.40   10.10
  -9  -3  -1   37.40    8.50
   9   3  -1   27.00    6.40
  -9   3   1   10.60   13.80
  -9  -3   1   35.60    8.70
   9  -3  -1   28.80    5.20
   9   3   1   26.30    6.20
  -9  -3   1   14.80    9.80
  -9   3  -1   19.10   13.20
   0   4  -1 1014.50   35.00
   0  -4   1 1115.79   32.10
   0   4   1 1065.89   36.00
   0  -4  -1 1084.29   32.60
  -1   4   1  690.83   26.70
   1   4  -1  663.63   28.60
   1  -4   1  687.03   27.30
  -1   4   1  679.03   27.90
   1   4   1  649.64   28.70
  -1   4  -1  617.84   26.60
   1  -4  -1  621.84   26.70
  -2   4   1   35.30   11.50
  -2   4   1    3.80   10.00
   2  -4   1   22.30   11.50
   2   4  -1   29.30   14.10
  -2   4  -1   23.00    9.20
  -2   4  -1   45.30   12.90
   2   4   1   36.40   14.00
   2  -4  -1   27.90   13.20
   3  -4   1   87.89   17.50
   3   4  -1   92.59   17.40
   3  -4  -1   78.69   16.00
   3   4   1   92.69   19.50
   4  -4   1  941.41   39.60
   4  -4  -1 1063.19   44.40
  -5  -4  -1  363.06   18.20
  -5   4   1  371.96   20.50
  -5  -4  -1  330.57   15.50
   5  -4   1  318.67   13.10
  -5  -4   1  436.26   18.50
  -5   4  -1  421.46   21.80
   5  -4  -1  395.26   14.90
  -5  -4   1  425.26   17.10
  -6  -4  -1  170.08   17.90
   6  -4   1  190.78   11.90
  -6  -4  -1  187.58   15.90
  -6   4   1  158.38   20.60
  -6   4  -1  174.98   21.90
  -6  -4   1  204.08   15.40
  -6  -4   1  193.08   18.60
   6  -4  -1  195.08   12.00
   7  -4   1  283.07   14.00
  -7  -4  -1  309.67   20.60
  -7   4   1  306.07   26.20
  -7  -4  -1  289.17   16.50
  -7   4  -1  286.77   24.70
  -7  -4   1  293.67   23.20
   7  -4  -1  291.57   14.10
  -7  -4   1  281.37   18.10
  -8   4   1    0.30   15.60
  -8  -4  -1   26.60    9.80
  -8  -4  -1   17.80   12.00
   8  -4   1   26.70    6.50
  -8  -4   1   38.40   10.10
   8  -4  -1   16.00    6.30
  -8  -4   1   20.30   12.20
  -8   4  -1   48.30   16.40
  -9   4   1   62.49   12.20
   9   4  -1   68.69    8.10
  -9  -4  -1   67.09    9.90
  -9  -4   1   85.79   10.60
  -9   4  -1   70.09   12.40
   0   5  -1   65.39   17.40
   0   5   1   50.29   15.30
  -1   5   1  318.37   23.00
  -1   5   1  331.07   24.40
   1   5  -1  319.37   25.20
   1  -5   1  292.87   22.70
  -1   5  -1  361.76   24.90
   1   5   1  406.26   27.40
   1  -5  -1  339.37   25.40
  -2   5   1  158.08   19.00
   2  -5   1  212.08   22.30
  -2   5   1  183.38   19.70
   2   5  -1  166.48   22.90
  -2   5  -1  149.59   20.50
   2   5   1  124.99   22.70
   2  -5  -1  143.99   20.90
   3   5  -1  221.58   23.90
   3  -5   1  169.58   24.40
   3  -5  -1  268.87   29.70
   3   5   1  320.27   28.10
   4  -5   1  141.29   10.80
  -4   5   1  139.49   15.60
  -4  -5  -1  131.79   15.90
  -4  -5   1  175.18   16.90
   4  -5  -1  171.48   10.70
  -4   5  -1  190.08   19.30
  -5   5   1  355.16   24.20
   5  -5   1  292.97   13.90
  -5  -5  -1  311.07   19.60
  -5   5  -1  347.87   23.00
  -5  -5   1  291.87   19.30
   5  -5  -1  304.97   14.10
  -6  -5  -1  188.48   18.90
  -6   5   1  154.38   23.40
   6  -5   1  179.48   12.20
  -6  -5  -1  168.88   14.50
  -6   5  -1  153.68   22.60
  -6  -5   1  185.58   18.20
   6  -5  -1  175.18   12.40
  -6  -5   1  184.58   17.80
  -7  -5  -1   18.20    9.90
  -7  -5  -1   15.50   12.10
  -7   5   1   28.30   14.70
   7  -5   1    7.50    6.80
  -7  -5   1   18.70   12.20
  -7  -5   1   10.40    9.40
   7  -5  -1   17.90    7.20
  -7   5  -1   16.40   15.10
   8  -5   1   57.99    8.30
  -8  -5  -1   46.80   10.70
  -8  -5  -1   45.10    8.00
  -8   5   1   37.50   14.00
  -8  -5   1   30.80   10.60
   8  -5  -1   54.29    8.60
  -8  -5   1   49.40    8.40
  -8   5  -1   57.69   13.90
   0   6  -1   13.00   19.20
   0   6   1   16.90   20.00
  -1  -6  -1  314.77   13.20
  -1   6   1  360.86   28.80
   1  -6   1  353.96   13.90
   1   6  -1  370.96   30.30
  -1   6   1  356.96   26.60
   1  -6  -1  294.77   12.90
   1   6   1  346.57   29.30
  -1   6  -1  316.57   24.70
  -1  -6   1  284.87   13.00
  -1   6  -1  318.77   30.70
   2   6  -1   88.59   24.00
  -2  -6  -1   97.59   10.90
  -2   6   1  109.89   20.80
   2  -6   1   88.09   10.20
  -2  -6   1  109.49   10.80
   2   6   1  110.69   22.90
  -2   6  -1  120.69   21.80
   2  -6  -1  102.69   10.90
   3   6  -1   74.79   24.10
   3  -6   1   80.79   10.50
   3  -6  -1   68.59    9.60
   3   6   1   39.60   20.20
   4  -6   1  372.46   14.10
  -4  -6  -1  334.17   19.20
   4  -6  -1  361.26   14.80
  -4  -6   1  340.77   18.60
   5  -6   1  299.57   13.70
  -5   6   1  294.17   26.30
  -5  -6  -1  291.97   18.90
   5  -6  -1  302.77   14.50
  -5   6  -1  283.17   23.20
  -5  -6   1  312.97   19.70
  -6   6   1  197.78   22.40
  -6  -6  -1  250.37   18.60
   6  -6   1  212.58   12.70
   6  -6  -1  204.98   12.10
  -6   6  -1  230.78   22.40
  -6  -6   1  204.48   20.50
  -7   6   1   29.90   13.60
   7  -6   1   30.40    6.00
  -7  -6  -1   22.70   11.10
   7  -6  -1   23.00    6.50
  -7  -6   1   23.50   10.50
  -7   6  -1   25.50   13.40
  -8  -6  -1   50.59    8.50
  -8  -6   1   51.19    8.30
   0  -7  -1   49.10    7.70
   0   7   1   90.89   24.60
   0  -7   1   43.00    9.00
   0   7  -1   81.39   26.10
   1   7  -1  157.18   29.30
   1  -7   1  194.78   13.00
  -1  -7  -1  210.18   14.10
  -1   7   1  212.68   30.10
  -1   7  -1  238.98   33.60
  -1  -7   1  165.68   11.60
   1   7   1  243.78   37.00
   1  -7  -1  169.48   11.60
   2  -7   1  487.65   16.90
   2   7  -1  459.35   37.30
  -2   7   1  477.95   35.90
  -2  -7  -1  468.15   17.30
   2   7   1  485.95   40.10
  -2  -7   1  404.06   16.00
   2  -7  -1  415.86   16.40
  -2   7  -1  389.86   31.20
   3   7  -1  214.98   35.10
   3  -7   1  258.47   13.90
  -3   7  -1  233.78   19.00
   3   7   1  262.37   36.30
   3  -7  -1  243.58   13.70
   4  -7   1   69.19   11.30
   4  -7  -1   83.99   12.10
   5  -7   1    2.00    7.00
   5  -7  -1   -3.50    7.50
   6  -7   1   50.09    8.90
  -6  -7  -1   41.50   10.90
   6  -7  -1   56.49   10.10
  -6  -7   1   43.90   11.40
  -7  -7  -1   38.90    8.70
   7  -7  -1   73.49    8.90
  -7  -7   1   47.50    8.80
   0   8  -1  183.08   32.40
   0   8   1  119.29   29.00
   0  -8  -1  148.39   13.70
   0  -8   1  158.98   13.70
   1   8  -1   86.39   25.90
  -1   8   1  104.19   26.80
   1  -8   1   83.69    9.90
  -1  -8  -1   90.99   12.90
   1  -8  -1   68.59   12.10
  -1  -8   1   88.49   12.90
  -1   8  -1  114.79   26.40
  -1   8  -1   51.89   12.70
   1   8   1  118.59   28.70
   2   8  -1   70.59   13.80
   2  -8   1   65.59   11.50
  -2  -8  -1  131.09   13.70
   2  -8  -1   65.29    8.70
  -2   8  -1   58.79   13.40
   3  -8   1   43.10    8.40
  -3   8   1   33.00   11.60
  -3   8  -1   37.00   11.60
   3  -8  -1   32.30    8.20
   4  -8   1  222.28   12.30
   4  -8  -1  186.98   12.00
   5  -8   1  110.49   10.10
   5  -8  -1  111.19   10.40
   6   8  -1   24.00    6.10
   6   8   1    9.20    6.90
   0  -9  -1  731.83   21.60
   0   9  -1  740.83   27.40
   0  -9   1  731.23   20.90
   0   9   1  713.93   28.20
  -1  -9  -1  116.09   12.40
  -1   9   1   68.69   12.50
   1   9  -1   91.89   14.50
   1  -9   1  107.09   11.10
  -1   9  -1   75.99   14.80
   1  -9  -1   88.39   12.70
   1   9   1   73.99   12.90
  -1  -9   1   90.49   11.70
  -2   9   1  111.49   15.00
   2  -9   1  142.09   12.10
   2   9  -1  126.19   16.20
  -2   9  -1   87.89   15.40
   2  -9  -1  148.39   11.40
   2   9   1  125.39   17.60
   3  -9   1   12.70    6.80
  -3   9   1   37.50   11.50
  -3   9  -1   29.80   11.00
   3  -9  -1   21.50    7.40
   4   9  -1   69.89   13.60
   4  -9   1  100.29    8.90
   4  -9  -1   80.09    9.30
   4   9   1   70.19   14.10
   0  10  -1   11.40   11.50
   0  10  -1   27.10   12.20
   0  10   1   11.30   10.70
   1  10  -1  238.18   19.90
   1 -10   1  218.28   10.20
   1  10  -1  226.88   14.20
  -1  10   1  204.08   19.00
  -1  10  -1  197.18   18.60
   1  10   1  247.88   15.10
   1 -10  -1  209.38    9.80
   2 -10   1   19.00    5.00
   2  10  -1   24.50    9.50
   2  10  -1    8.20   13.30
  -2  10   1   13.70    9.00
  -2  10  -1   23.40    9.40
   2  10   1   -1.30   11.70
   2 -10  -1   21.90    5.50
   0   0   2  689.13   15.20
  -1   0   2 1356.96   30.90
   1   0   2 1351.46   30.70
   1   0  -2 1345.47   30.30
   2   0  -2 2570.94   57.39
   2   0   2 2612.14   58.69
  -2   0   2 2577.74   57.99
  -3   0   2    6.40    9.00
   3   0   2    7.70    9.10
   3   0  -2    9.70    9.60
   4   0  -2 1106.29   35.70
  -4   0   2 1115.49   34.10
   4   0   2 1109.59   35.80
   5   0   2  135.49   22.30
  -6   0   2   90.29   10.30
  -6   0  -2   83.39    9.10
  -6   0   2   70.89   12.30
  -6   0  -2   67.39   11.20
  -7   0   2  121.49   19.90
  -7   0  -2  135.09   15.20
  -7   0   2  134.59   16.10
  -7   0  -2  138.59   15.30
   8   0  -2  142.49   13.90
  -8   0  -2  115.19   16.80
  -8   0  -2  158.28   16.40
   8   0   2  113.79   13.60
  -8   0   2  120.19   16.10
   9   0  -2  105.09   10.80
  -9   0   2   88.39   11.10
   9   0   2  112.79    9.60
  -9   0  -2  112.49   14.20
   0  -1   2 2658.63   56.49
   0  -1  -2 2811.62   57.89
  -1   1   2 4811.82   98.99
   1  -1   2 4712.93   99.59
  -1  -1   2 4702.73  100.19
   1  -1  -2 4846.42  100.49
  -1   1  -2 4820.62   97.09
  -2   1   2   66.69   10.00
   2  -1   2   42.80   10.80
  -2   1  -2   47.60    6.70
   2   1   2   47.30    6.80
   2  -1  -2   55.59   10.50
  -2  -1   2   48.70   11.20
   3   1  -2  925.91   25.20
   3  -1   2  918.11   31.10
  -3   1   2  928.21   27.50
  -3   1  -2  872.61   22.30
  -3  -1   2  910.61   28.20
   3  -1  -2  856.31   30.30
   3   1   2  897.51   25.90
  -4   1   2  303.27   17.80
   4  -1   2  280.57   21.20
   4  -1  -2  283.37   22.30
   4   1   2  348.77   20.40
   5  -1   2   16.70   15.30
   5  -1  -2   20.80   12.20
   6  -1   2    8.80    7.20
   6  -1   2  -36.30   15.30
  -6  -1  -2   18.50    9.10
  -6   1   2    6.70   11.90
  -6  -1  -2   10.40    8.60
  -6   1   2   22.70    8.10
  -6  -1   2    0.40    9.70
  -6   1  -2   17.60   11.20
   6  -1  -2   14.30    6.90
  -6   1  -2    3.90    7.30
  -6  -1   2   12.40    8.80
  -7  -1  -2   36.90   11.00
  -7   1   2   12.20   14.00
  -7   1   2   20.80   10.40
  -7  -1  -2   21.90   10.90
   7  -1   2   14.30    8.30
  -7   1  -2   49.00    9.50
  -7   1  -2   40.20   13.50
  -7  -1   2   39.80   11.30
  -7  -1   2   66.79   11.90
   7  -1  -2   52.89    9.30
  -8  -1  -2    9.00   11.00
  -8   1   2   18.40   15.90
   8  -1   2    7.00    7.20
  -8   1   2    7.20   10.00
   8   1   2   17.70    8.30
  -8   1  -2    4.90    9.40
  -8   1  -2    6.70   16.70
  -8  -1   2   -1.10   12.10
   8  -1  -2   16.70    8.90
   9   1  -2  194.58   11.90
   9  -1   2  194.68   10.70
  -9   1   2  172.38   22.90
  -9   1   2  189.48   14.70
  -9  -1  -2  192.98   14.30
  -9  -1   2  191.78   15.20
  -9   1  -2  176.88   21.50
   9  -1  -2  195.28   12.10
  -9   1  -2  216.28   19.30
   9   1   2  202.38   11.30
   0  -2   2  783.62   22.10
   0   2  -2  726.03   24.10
   0  -2  -2  809.82   24.20
   1   2  -2 1231.28   33.00
  -1   2   2 1247.88   32.50
   1  -2   2 1234.78   33.00
   1  -2  -2 1367.06   36.10
  -1   2  -2 1263.47   33.20
  -2   2   2  180.98   14.00
   2  -2   2  157.28   17.50
   2   2  -2  185.38   13.60
  -2   2  -2  246.78   11.40
   2  -2  -2  255.57   19.80
   2   2   2  259.47   11.10
   3   2  -2  157.48   14.30
   3  -2   2  212.98   20.40
  -3   2   2  222.68   16.20
   3   2   2  170.58   10.70
   3   2   2  108.29   12.10
   3  -2  -2  184.18   23.20
   4  -2   2 1369.76   46.60
   4  -2  -2 1176.18   40.40
   5  -2   2  139.49   23.40
   5  -2  -2  107.39   17.70
  -6   2   2   51.89   13.40
  -6  -2  -2   49.10   10.70
  -6   2   2   45.20    8.80
   6  -2   2   42.00    7.30
  -6  -2  -2   51.79   10.00
   6  -2  -2   38.00    7.40
  -6   2  -2   35.20   13.50
  -6  -2   2   38.80    9.80
  -6  -2   2   37.00    9.70
  -7   2   2  -15.90   14.10
  -7   2   2   16.30    9.70
  -7  -2  -2  -12.40   10.70
  -7  -2  -2    9.20   11.00
   7  -2   2    5.10    6.90
  -7  -2   2   -2.90   11.40
   7  -2  -2   10.30    7.50
  -7  -2   2    8.80   11.70
  -7   2  -2    0.50   14.20
   8  -2   2   27.90    7.70
  -8  -2  -2   30.20   11.90
  -8   2   2   26.40   14.90
  -8  -2  -2   32.00   11.10
   8  -2  -2   13.10    7.90
  -8  -2   2   14.60   11.00
  -8   2  -2   24.60   17.20
  -8  -2   2   23.00   12.20
   9   2  -2   35.50    7.40
  -9   2   2   35.80   14.00
   9  -2   2   38.30    6.10
  -9  -2  -2   51.39    8.90
  -9   2  -2   40.20   14.60
   9  -2  -2   29.80    6.60
   9   2   2   31.90    7.00
  -9  -2   2   47.70    8.90
   0   3  -2   20.40   11.40
   0  -3   2   25.30    7.60
   0  -3  -2   38.60    8.90
   1  -3   2  887.41   28.00
  -1   3   2  902.51   28.20
   1   3  -2  837.32   28.10
  -1   3  -2  826.62   26.90
   1  -3  -2  863.31   28.70
   2  -3   2  221.78   20.10
   2   3  -2  204.68   17.20
  -2   3   2  247.08   16.60
   2   3   2  173.28   16.30
  -2   3  -2  235.98   13.20
  -2   3  -2  204.48   13.80
   2  -3  -2  214.38   19.10
   3   3  -2   93.99   16.60
   3  -3   2   80.09   15.00
  -3   3   2   89.39   15.70
   3  -3  -2  107.59   18.70
   3   3   2   89.29   13.30
   4  -3   2  398.76   27.60
   4  -3  -2  468.95   28.50
   5  -3   2  106.99   21.00
  -5  -3  -2  129.79   15.00
  -5  -3  -2  105.89   13.80
  -5   3   2  116.69   18.50
   5  -3  -2  124.09   11.00
  -5  -3   2  138.19   11.40
   5  -3  -2   82.49   21.60
  -5   3  -2  134.29   17.30
  -5  -3   2  130.59   14.70
  -6   3   2   -9.90   11.90
  -6  -3  -2   -5.40    9.10
   6  -3   2    5.80    7.20
  -6  -3  -2   -6.20   10.40
  -6  -3   2    0.70   10.20
   6  -3  -2   27.30    7.80
  -6  -3   2    4.10   10.70
  -6   3  -2   -6.90   13.20
  -7  -3  -2  169.68   17.20
  -7   3   2  166.98   23.50
   7  -3   2  148.99   12.00
  -7  -3  -2  146.79   19.30
  -7   3  -2  147.49   23.90
  -7  -3   2  115.09   19.10
  -7  -3   2  114.89   16.70
   7  -3  -2  140.69   12.40
  -8  -3  -2   46.60   10.30
  -8  -3  -2   65.39   12.40
  -8   3   2   34.10   15.30
   8  -3   2   40.80    7.60
   8  -3  -2   34.70    7.90
  -8   3  -2   77.29   17.30
  -8  -3   2   57.39   12.90
  -8  -3   2   62.49   11.40
  -9  -3  -2   11.40    9.20
  -9   3   2   18.90   12.70
   9   3  -2   13.00    6.10
  -9  -3  -2   15.40    8.40
  -9  -3   2   14.50    9.40
   9  -3  -2   14.00    5.00
   9   3   2    7.90    5.70
  -9   3  -2   10.00   14.10
  -9  -3   2    5.30    7.80
   0   4  -2 1425.56   42.10
   0  -4   2 1396.66   37.70
   0  -4  -2 1456.35   40.40
   1   4  -2  485.75   24.40
  -1   4   2  504.55   24.40
   1  -4   2  473.95   24.10
   1  -4  -2  517.75   24.90
   1   4   2  558.74   26.30
  -1   4  -2  522.45   24.50
   2  -4   2  181.18   23.30
  -2   4   2  168.48   16.20
   2   4  -2  180.58   22.10
  -2   4   2  187.58   17.30
  -2   4  -2  229.98   18.30
  -2   4  -2  230.68   16.40
   2   4   2  204.48   19.50
   2  -4  -2  229.38   21.70
   3   4  -2  106.69   21.40
   3  -4   2   41.70   15.50
   3  -4  -2   57.49   15.30
   3   4   2   55.29   15.40
   4  -4   2   22.00   15.20
   4  -4  -2    2.80   16.80
  -5  -4  -2  681.63   22.70
  -5   4   2  672.73   24.90
  -5  -4  -2  654.93   21.10
   5  -4   2  653.43   19.60
   5  -4  -2  611.14   19.60
  -5   4  -2  634.14   24.60
  -5  -4   2  601.74   22.20
  -5  -4   2  613.94   20.40
  -6   4   2  344.47   23.60
   6  -4   2  388.46   15.80
  -6  -4  -2  360.46   16.40
  -6  -4  -2  352.56   19.10
  -6   4  -2  314.07   21.90
  -6  -4   2  361.96   17.70
  -6  -4   2  366.76   20.50
   6  -4  -2  350.46   15.40
  -7  -4  -2   76.89   11.60
  -7  -4  -2   69.69   13.80
  -7   4   2   30.20   15.50
   7  -4   2   53.19    8.00
  -7  -4   2   73.89   13.20
  -7  -4   2   86.59   11.90
   7  -4  -2   69.79   12.30
  -7   4  -2   72.89   14.90
  -8   4   2   33.80   16.10
   8  -4   2   24.10    6.40
  -8  -4  -2   11.00   11.60
  -8  -4  -2   19.60   10.10
   8  -4  -2   29.10    6.50
  -8  -4   2   26.20    9.90
  -8   4  -2   14.70   15.60
  -8  -4   2    3.60   11.90
  -9  -4  -2   99.19   16.30
   9   4  -2   71.99    8.80
  -9   4   2   99.19   16.20
  -9  -4   2   79.79   12.40
  -9   4  -2   68.89   12.00
   0   5  -2   45.40   16.60
   0   5   2   58.89   16.40
   1  -5   2  922.01   35.20
  -1   5   2  915.81   35.30
  -1   5   2  977.90   37.50
   1   5  -2  938.31   37.30
   1  -5  -2  900.81   35.40
   1   5   2  910.71   36.40
  -1   5  -2  939.11   35.80
  -2   5   2  476.25   25.90
   2  -5   2  415.36   29.10
   2   5  -2  475.75   29.40
  -2   5   2  488.95   25.00
   2   5   2  450.45   27.90
  -2   5  -2  440.96   25.10
   2  -5  -2  438.76   28.10
   3   5  -2   99.19   20.30
   3  -5   2   78.39   19.00
   3  -5  -2   74.29   16.70
   3   5   2  106.59   21.30
   4  -5   2   66.49    9.70
  -4  -5  -2   43.30   10.10
  -4   5   2   49.70   12.70
   4  -5  -2   59.79    8.00
  -4   5  -2   47.10   12.10
  -4  -5   2   56.49   10.70
  -5  -5  -2   19.30   10.90
  -5   5   2   31.70   13.10
   5  -5   2    8.40    7.40
  -5   5  -2   28.40   15.00
  -5  -5   2  -11.40   11.60
   5  -5  -2    6.30    7.30
   6  -5   2  146.69   11.40
  -6  -5  -2  116.49   18.20
  -6   5   2   84.69   16.80
  -6  -5  -2  109.09   15.50
   6  -5  -2  138.19   11.90
  -6  -5   2  127.09   18.80
  -6   5  -2  125.99   20.80
  -7  -5  -2  194.78   15.30
  -7   5   2  204.18   22.50
   7  -5   2  195.38   11.70
  -7  -5  -2  173.88   17.80
  -7  -5   2  201.78   14.90
  -7  -5   2  176.48   18.80
  -7   5  -2  185.48   23.00
   7  -5  -2  184.08   12.20
  -8  -5  -2   12.90    7.70
  -8  -5  -2   40.90   10.80
  -8   5   2   26.00   14.40
  -8   5  -2    8.30   13.80
   8  -5  -2   18.50    5.70
  -8  -5   2   29.30   10.20
  -8  -5   2   26.90    7.60
   0   6  -2   31.70   18.80
   0   6   2   15.80   17.70
   0  -6  -2    0.80    7.20
  -1  -6  -2  569.24   17.60
  -1   6   2  626.84   35.80
  -1   6   2  573.04   32.50
   1   6  -2  603.14   38.00
   1  -6   2  599.24   22.90
  -1  -6   2  578.74   18.60
  -1   6  -2  627.84   34.30
   1  -6  -2  605.14   19.10
   1   6   2  654.33   35.60
  -2   6   2   92.19   19.40
   2   6  -2  116.69   23.10
   2  -6   2   88.79   10.10
  -2  -6  -2   86.59    9.40
  -2  -6   2  153.08   10.50
   2   6   2  153.18   31.90
   2  -6  -2  120.59   10.00
   2  -6  -2   84.99   18.40
  -2   6  -2  131.89   24.70
   3   6  -2  172.48   28.50
   3  -6   2  156.88   11.30
   3  -6  -2  147.09   11.90
  -3   6  -2  183.78   15.80
   3   6   2  140.49   27.30
   4  -6   2  120.89   11.20
  -4  -6  -2  127.79   17.10
  -4  -6   2   95.99   12.20
   4  -6  -2  101.19   11.30
  -5   6   2   91.19   16.50
   5  -6   2   75.99   10.90
  -5  -6  -2   47.90   11.70
   5  -6  -2   73.89   11.60
  -5   6  -2   82.39   14.40
  -5  -6   2   62.09   11.90
  -6  -6  -2   96.99   16.80
  -6   6   2   92.09   15.60
   6  -6   2   85.59   11.20
   6  -6  -2   84.79   11.10
  -6   6  -2   94.79   15.60
  -6  -6   2  121.19   17.00
  -7  -6  -2  131.69   16.10
  -7   6   2  145.09   21.00
   7  -6   2  151.98   13.00
  -7   6  -2  114.59   18.70
   7  -6  -2  131.89   10.60
  -7  -6   2   93.69   12.40
   0  -7  -2   21.20    7.80
   0   7  -2   25.10   24.20
   0   7   2   41.10   22.70
   0  -7   2   23.50    8.30
   1  -7   2  122.09   11.10
   1   7  -2  116.89   27.00
  -1  -7  -2   84.19   11.50
  -1   7   2  165.48   32.90
  -1   7  -2  179.28   33.80
  -1  -7   2  116.99   11.10
   1  -7  -2  115.29   12.30
   1   7   2  133.89   28.70
   2  -7   2  149.99   12.10
   2   7  -2  151.38   32.00
  -2  -7  -2  154.58   13.50
  -2   7   2  140.49   29.70
   2   7   2  122.99   26.80
   2  -7  -2  135.59   11.40
  -2  -7   2  132.29   11.80
  -2   7  -2  117.69   25.10
   3   7  -2  183.58   35.00
   3  -7   2  190.18   13.70
   3   7   2  172.18   35.00
   3  -7  -2  163.88   13.00
  -3   7  -2  153.78   17.00
   4  -7   2   67.89    8.80
   4  -7  -2   73.69   11.60
   5  -7   2   19.10    7.10
   5  -7  -2   29.80    8.20
  -6  -7  -2   24.90   11.30
   6  -7   2   -2.10    5.90
   6  -7  -2   -1.00    6.40
  -6  -7   2    2.20   10.10
  -7  -7  -2   96.79   12.00
  -7  -7   2  125.29   12.40
   7  -7  -2  133.79    9.50
   0   8  -2   16.80   21.80
   0   8   2   12.30   24.10
   0  -8  -2    6.00    8.90
   0   8  -2  -16.50   12.70
   0  -8   2    5.30    8.20
   1   8  -2  385.06   36.70
  -1  -8  -2  365.46   15.80
   1  -8   2  371.66   15.60
  -1   8   2  384.36   37.90
   1   8  -2  334.07   21.70
  -1   8  -2  376.66   37.10
   1  -8  -2  304.37   15.00
  -1   8  -2  304.27   20.30
   1   8   2  354.86   39.90
  -1  -8   2  301.67   13.80
   2   8  -2   51.69   12.90
   2  -8   2   50.69    8.20
  -2  -8  -2   85.59   13.60
  -2   8  -2   25.10   12.00
   2  -8  -2   35.00    7.90
  -3   8   2   85.59   17.10
   3  -8   2   74.19   11.20
  -3   8  -2   82.79   15.90
   3  -8  -2   84.79   11.80
   4   8  -2   40.80   17.00
   4  -8   2   59.59   10.20
   4  -8  -2   83.29   11.70
   5  -8   2   75.09    9.50
   5  -8  -2   49.40    7.10
   6   8  -2    5.30    6.10
   6  -8  -2   16.20    5.50
   0  -9   2   58.59   10.20
   0  -9  -2   47.00    8.10
   0   9  -2   20.40   13.00
   0   9   2   29.80   13.30
  -1   9   2   45.20   13.70
  -1  -9  -2   74.19   11.50
   1   9  -2   33.30   11.50
   1  -9   2   77.79   11.60
   1   9   2   35.30   13.10
   1  -9  -2   61.99    9.30
  -1   9  -2   32.00   11.40
   2  -9   2   21.00    7.50
  -2   9   2   12.20   11.60
   2   9  -2   23.40   12.20
   2  -9  -2   15.60    7.60
  -2   9  -2    2.40   12.50
   2   9   2   10.20   11.10
   3  -9   2    9.60    6.20
   3   9  -2  -18.50   14.60
  -3   9   2   32.20   11.10
  -3   9  -2   18.10   11.00
   3  -9  -2   10.70    7.30
   4   9  -2   41.80   13.50
   4  -9   2   57.09    8.30
   4   9   2   68.39   14.30
   4  -9  -2   75.29    9.10
   0  10  -2   54.79   14.30
   0  10   2   42.40   10.90
   0  10  -2   52.99   10.70
  -1  10   2   44.60   10.70
   1 -10   2   42.30    6.30
   1  10  -2   31.30   14.90
   1  10  -2   36.90   10.50
  -1  10  -2   40.20   11.10
   1  10   2   34.60   10.60
   1 -10  -2   34.10    5.50
   2  10  -2   92.49   14.50
  -2  10   2  155.58   13.40
   2  10  -2  137.49   13.90
   2 -10  -2  141.19    9.30
   2  10   2  158.88   13.80
  -2  10  -2  129.09   14.80
   0   0   3    4.50    2.80
   1   0   3  252.57   11.60
   1   0  -3  271.57   11.50
  -1   0   3  250.17   12.00
  -2   0   3  121.29   15.00
   2   0   3  173.48   14.10
   2   0  -3  159.68   14.30
   3   0  -3   -3.60    8.40
  -3   0   3   -8.00    9.80
   3   0   3    1.40    8.90
  -4   0   3    9.20   10.70
   4   0   3   23.00   10.60
   4   0  -3    1.60    9.80
   5   0   3  361.06   24.40
  -6   0  -3  116.19   13.80
  -6   0   3  136.79   18.40
  -6   0  -3  128.29   17.30
  -6   0   3  103.99   12.30
  -7   0  -3   27.50   14.30
  -7   0  -3    8.50   10.50
  -7   0   3   26.70   14.30
  -7   0   3   -1.00   10.60
   8   0   3  237.98   13.70
  -8   0  -3  262.57   16.60
  -8   0  -3  277.07   24.50
  -8   0   3  259.57   17.80
   8   0  -3  260.17   15.60
   9   0  -3   77.89   10.60
   9   0   3   69.29    9.80
  -9   0  -3   80.19    9.80
  -9   0   3   89.89   14.00
   0  -1   3 3330.07   68.79
   1  -1   3  940.21   25.90
  -1   1   3  985.20   25.80
  -1  -1   3 1124.09   29.80
   1  -1  -3 1189.98   30.30
   2  -1   3 6045.80  129.99
   2   1  -3 6268.07  125.49
  -2   1   3 6087.59  128.99
  -2  -1   3 6218.08  128.29
  -2   1  -3 5743.83  121.59
   2  -1  -3 6121.19  128.29
   2   1   3 6087.69  125.69
  -3   1   3  999.20   29.90
   3  -1   3 1006.10   33.00
   3   1  -3 1045.10   27.90
   3  -1  -3 1128.09   36.10
   3   1   3 1117.19   31.40
  -3  -1   3 1156.88   34.90
   4  -1   3  160.68   22.90
  -4   1   3  184.28   16.60
   4  -1  -3  169.48   19.10
   4   1   3  236.28   17.50
   5  -1   3  271.07   28.40
   5  -1  -3  156.58   22.70
  -6   1   3  413.16   17.30
   6  -1   3  397.46   29.00
  -6  -1  -3  414.56   17.70
   6  -1   3  408.96   15.20
  -6   1   3  393.76   20.10
  -6  -1  -3  422.46   18.10
  -6  -1   3  409.96   18.30
   6  -1  -3  415.66   14.90
  -6  -1   3  421.56   18.20
  -6   1  -3  420.16   20.90
  -6   1  -3  396.76   16.20
  -7  -1  -3  225.68   17.70
  -7   1   3  236.48   16.70
   7  -1   3  237.28   13.10
  -7  -1  -3  210.28   18.80
  -7   1   3  223.38   21.90
  -7   1  -3  227.08   16.40
  -7  -1   3  236.78   16.70
  -7   1  -3  210.68   23.20
   7  -1  -3  244.18   14.50
  -7  -1   3  254.87   18.90
  -8   1   3  154.78   24.30
   8   1  -3  159.38   13.20
  -8  -1  -3  143.59   16.10
  -8   1   3  146.99   17.30
   8  -1   3  136.09   11.50
   8  -1  -3  179.38   13.90
  -8  -1   3  187.58   16.80
  -8   1  -3  172.28   15.80
   8   1   3  173.18   13.70
  -8   1  -3  149.59   23.70
   9  -1   3   53.89    8.90
  -9   1   3   66.69    9.90
  -9  -1  -3   79.89    9.40
   9   1  -3   60.39   10.60
  -9   1  -3   67.29   15.00
   9  -1  -3   63.39   10.70
   9   1   3   73.39   10.50
  -9  -1   3   63.89   10.60
   0  -2   3  987.70   25.40
   0   2  -3  955.30   28.40
   0  -2  -3 1021.10   28.30
  -1   2   3   21.60    9.20
   1   2  -3   26.20   10.80
   1  -2   3   23.00    9.30
   1  -2  -3   17.40    9.80
  -1   2  -3   30.10    8.70
   2  -2   3  143.59   17.30
  -2   2   3  145.29   13.10
   2   2  -3  159.38   14.00
   2  -2  -3   90.89   16.10
   2   2   3  122.19   10.10
  -2   2  -3   94.29    8.10
   3   2  -3  662.03   23.90
   3  -2   3  710.43   29.20
  -3   2   3  638.74   25.60
   3   2   3  541.25   19.00
   3   2   3  579.54   19.20
   3  -2  -3  595.94   27.50
   4  -2   3  381.06   26.60
   4  -2  -3  461.25   26.70
   5  -2   3  366.36   32.20
   5  -2  -3  420.26   29.60
  -6  -2  -3    9.70   10.10
   6  -2   3   11.60    7.40
  -6   2   3    6.60   13.10
  -6  -2  -3   -4.10    9.50
  -6   2   3    7.00    8.00
   6  -2  -3    7.80    6.80
  -6   2  -3    2.10   12.80
  -6  -2   3    2.70    9.80
  -6  -2   3   -0.40    9.90
  -7  -2  -3  415.66   19.40
   7  -2   3  389.56   15.50
  -7   2   3  421.06   18.60
  -7   2   3  373.86   27.00
  -7  -2  -3  402.06   20.80
  -7   2  -3  320.77   23.80
  -7  -2   3  376.06   18.10
   7  -2  -3  339.57   15.30
  -7  -2   3  359.06   19.70
  -8  -2  -3  227.28   20.80
  -8   2   3  225.58   26.90
  -8   2   3  251.87   19.30
   8  -2   3  223.48   12.50
  -8  -2  -3  219.08   16.90
   8  -2  -3  227.88   14.20
  -8   2  -3  243.58   25.90
  -8  -2   3  218.38   17.60
  -8  -2   3  252.07   18.40
   9   2  -3  174.98   12.10
  -9  -2  -3  123.39   14.90
  -9   2   3  166.38   21.40
  -9   2  -3  176.98   22.70
   9  -2  -3  162.58   10.60
  -9  -2   3  171.48   13.70
   9   2   3  156.58   10.00
   0   3  -3  143.99   15.20
   0  -3  -3  163.58   17.30
   0  -3   3  152.38   12.70
   1  -3   3 1359.66   37.80
   1   3  -3 1307.57   37.70
  -1   3   3 1381.76   37.90
   1  -3  -3 1334.97   37.90
  -1   3  -3 1332.67   36.10
   2  -3   3   23.40   11.90
  -2   3   3   15.50   10.20
   2   3  -3   14.20   11.60
  -2   3  -3   16.00    7.00
   2  -3  -3   10.20   11.90
  -2   3  -3   22.70   10.00
   3  -3   3  244.18   24.40
   3   3  -3  266.37   19.90
  -3   3   3  232.58   18.60
   3  -3  -3  206.38   21.50
   3   3   3  182.68   16.70
   4  -3   3   16.00   16.40
   4  -3  -3   14.60   14.60
  -5   3   3  311.47   19.50
  -5  -3  -3  346.07   14.70
  -5  -3  -3  353.96   18.10
   5  -3   3  306.87   32.40
  -5  -3   3  371.16   19.50
   5  -3  -3  316.37   29.60
   5  -3  -3  352.76   14.30
  -5  -3   3  329.07   16.00
  -5   3  -3  365.76   22.00
  -6  -3  -3  103.59   17.00
  -6  -3  -3  108.29   13.30
  -6   3   3  123.99   19.30
   6  -3   3  129.59   11.30
  -6  -3   3  147.09   17.50
   6  -3  -3  124.19   11.80
  -6   3  -3  137.69   21.50
  -6  -3   3  124.29   15.30
   7  -3   3  162.18   12.10
  -7  -3  -3  148.19   17.20
  -7  -3  -3  125.59   19.80
  -7   3   3  147.19   25.80
   7  -3  -3  133.99   11.40
  -7  -3   3  140.69   19.00
  -7  -3   3  156.28   17.90
  -7   3  -3  105.49   15.80
  -8  -3  -3   32.50   10.60
  -8   3   3   16.00   16.40
   8  -3   3   43.00    7.50
  -8  -3  -3   36.00   12.40
   8  -3  -3   58.29    8.50
  -8  -3   3   13.50   12.10
  -8   3  -3   40.50   15.90
  -8  -3   3   25.90   10.80
  -9   3   3   82.59   14.10
   9   3  -3   81.79    8.80
  -9  -3  -3   69.99    9.40
  -9  -3  -3   76.79   11.60
  -9  -3   3   76.59    9.70
   9   3   3   72.79    8.90
   9  -3  -3   64.09    7.70
  -9   3  -3   55.39   14.10
  -9  -3   3   76.89   11.60
   0   4  -3  462.85   25.20
   0  -4   3  487.75   19.80
   1  -4   3  206.08   19.20
  -1   4   3  221.88   18.30
   1   4  -3  217.88   20.40
  -1   4  -3  224.78   18.50
   1  -4  -3  221.08   19.40
   2   4  -3 1350.26   42.30
  -2   4   3 1314.87   40.20
   2  -4   3 1392.46   43.70
  -2   4  -3 1281.87   38.10
   2   4   3 1278.07   41.70
   2  -4  -3 1290.57   44.30
  -3   4   3  702.33   32.00
   3  -4   3  677.23   33.90
   3   4  -3  660.33   31.40
   3   4   3  633.14   28.90
   3  -4  -3  681.33   32.20
   4  -4   3  207.98   30.00
   4  -4  -3  192.98   24.50
  -5  -4  -3  225.08   17.60
   5  -4   3  214.18   12.40
  -5   4   3  242.28   18.90
  -5  -4  -3  239.18   15.40
  -5  -4   3  277.27   19.10
   5  -4  -3  262.77   14.00
  -5   4  -3  285.27   23.40
  -5  -4   3  264.87   14.30
  -6  -4  -3    6.00   11.50
  -6  -4  -3   25.90   10.30
   6  -4   3   26.10    8.00
  -6   4   3   20.30   14.70
   6  -4  -3   28.20    8.50
  -6  -4   3   10.40   12.50
  -6   4  -3   18.50   14.10
  -6  -4   3   24.00   10.40
  -7  -4  -3  175.98   17.10
  -7   4   3  250.87   28.10
   7  -4   3  222.88   12.80
  -7  -4  -3  220.38   19.40
   7  -4  -3  243.18   13.90
  -7  -4   3  242.48   20.20
  -7  -4   3  233.18   18.70
  -7   4  -3  237.58   25.20
  -8  -4  -3  186.78   15.30
  -8  -4  -3  165.68   18.30
  -8   4   3  163.88   22.90
  -8   4  -3  152.38   25.40
   8  -4  -3  177.78   10.90
  -8  -4   3  199.18   15.70
  -8  -4   3  173.08   18.60
  -9  -4  -3   62.59   10.10
   9   4  -3   73.79    8.50
   0   5   3  873.91   36.00
   0   5  -3  849.12   36.80
  -1   5   3  350.56   22.20
  -1   5   3  330.97   24.90
   1   5  -3  335.87   26.30
   1  -5   3  301.77   22.70
  -1   5  -3  323.47   25.60
   1   5   3  308.27   24.40
   1  -5  -3  313.57   24.60
  -2   5   3  237.08   21.20
   2   5  -3  237.68   24.30
  -2   5   3  235.58   21.50
   2  -5   3  230.98   22.40
   2   5   3  280.87   27.40
  -2   5  -3  252.57   22.70
   2  -5  -3  208.08   24.70
   3  -5   3  512.35   32.50
  -3  -5  -3  440.26   23.00
   3   5  -3  563.24   33.90
   3   5   3  630.54   33.90
   3  -5  -3  643.34   38.10
   4  -5   3   84.49    9.70
  -4   5   3   75.09   12.40
  -4  -5  -3   84.29   11.10
   4  -5  -3   85.89   10.70
  -4  -5   3   76.89   11.10
  -4   5  -3   99.89   16.70
   5  -5   3   38.00    7.60
  -5  -5  -3   30.60   10.90
  -5   5   3   42.70   14.30
  -5  -5  -3   40.00    9.10
   5  -5  -3   36.40    7.20
  -5   5  -3   61.69   14.00
  -5  -5   3   54.19   13.20
   6  -5   3    7.50    7.30
  -6  -5  -3    3.30   12.20
  -6  -5  -3    4.70   10.50
  -6   5   3  -13.10   14.50
  -6  -5   3    5.90   12.40
  -6   5  -3    8.90   14.00
   6  -5  -3    0.70    7.00
   7  -5   3   -2.10    6.00
  -7  -5  -3    3.60    9.10
  -7  -5  -3   -0.40   12.20
  -7   5   3   13.70   15.60
  -7  -5   3   19.20   10.00
  -7   5  -3  -18.50   14.20
  -7  -5   3    3.70   12.20
   7  -5  -3    1.10    6.70
  -8   5   3  -12.50   12.80
  -8  -5  -3   -6.90    9.80
  -8  -5  -3    1.30    7.80
   8  -5  -3   -2.30    5.30
  -8  -5   3    0.10    9.40
  -8   5  -3   -0.10   12.60
   0   6   3   24.30   14.90
   0   6   3   13.60   18.00
   0   6  -3   29.00   18.50
   0  -6  -3    7.20    7.30
   1   6  -3   95.09   21.20
  -1   6   3  109.59   21.50
  -1  -6  -3  104.39   11.10
  -1   6   3   92.39   16.70
   1   6   3  108.29   24.10
  -1   6  -3   95.19   20.00
  -1  -6   3   92.19   10.40
   1  -6  -3   97.19   10.10
   2  -6   3  265.37   12.40
  -2  -6  -3  252.37   12.90
  -2   6   3  295.87   28.70
   2   6  -3  284.47   33.20
  -2   6  -3  252.17   26.90
   2  -6  -3  269.37   13.00
   2  -6  -3  174.18   26.50
  -2  -6   3  248.68   11.40
   2   6   3  270.07   31.60
   3   6  -3 1180.28   51.39
   3  -6   3 1233.38   29.70
   3  -6  -3 1210.88   29.50
  -3   6  -3 1212.68   33.60
   3   6   3 1175.88   49.99
   4  -6   3  218.18   12.30
  -4  -6  -3  185.08   16.70
   4  -6  -3  202.88   12.60
  -4  -6   3  158.08   17.00
   5  -6   3  648.74   19.70
  -5  -6  -3  665.03   23.90
  -5   6   3  668.93   28.10
   5  -6  -3  618.84   20.30
  -5  -6   3  601.34   24.40
  -5   6  -3  674.63   38.30
   6  -6   3    4.00    6.90
  -6  -6  -3   22.90   11.80
  -6   6   3   16.90   14.10
  -6  -6   3   14.80   12.10
  -6   6  -3    8.10   13.40
   6  -6  -3    8.60    7.60
  -7  -6  -3   21.90   11.40
  -7   6   3    5.70   13.50
  -7   6  -3   42.10   12.20
  -7  -6   3   27.00   11.20
   7  -6  -3   27.10    6.70
   0   7   3  267.37   33.50
   0  -7  -3  237.48   12.40
   0  -7   3  271.37   13.90
   0   7  -3  277.17   32.50
  -1   7   3  252.97   36.20
   1   7  -3  154.48   31.30
  -1  -7  -3  143.49   13.40
   1  -7   3  148.19   11.40
   1   7   3  157.88   33.80
  -1   7  -3  160.48   27.90
  -1  -7   3  121.89   12.60
   1  -7  -3  116.59   11.10
   2  -7   3  165.78   12.20
  -2   7   3  183.18   30.40
   2   7  -3  174.08   31.90
   2   7  -3  185.88   18.90
  -2  -7  -3  186.48   14.20
   2   7   3  183.28   32.30
  -2   7  -3  209.38   30.30
  -2   7  -3  165.98   19.00
  -2  -7   3  169.28   12.70
   2  -7  -3  165.18   13.80
   3  -7   3  129.09   12.70
   3   7  -3  229.58   35.80
  -3   7  -3  168.68   19.10
   3  -7  -3  141.79   11.60
   3   7   3  189.48   34.90
   4  -7   3   56.69    8.50
   4  -7  -3   38.70    8.10
   5  -7   3   32.70    7.40
   5  -7  -3   28.30    7.70
   6   7  -3   59.49    8.20
  -6  -7  -3   65.99   11.20
  -6  -7   3   36.80   10.30
   6  -7  -3   56.09    7.30
  -7  -7  -3   16.30    7.90
  -7  -7   3   35.90    9.20
   7  -7  -3   39.40    5.30
   0   8  -3    3.10   12.50
   0  -8  -3   -1.80    8.50
   0   8   3   12.40   24.10
   0   8  -3   25.00   24.60
   0  -8   3    9.90    8.20
  -1  -8  -3   78.99   12.60
   1  -8   3   73.09   11.50
   1   8  -3   78.39   25.10
  -1   8   3  152.68   32.20
   1   8  -3   47.40   12.40
   1  -8  -3   69.79    9.00
  -1  -8   3   61.69   11.10
  -1   8  -3  100.79   25.30
   1   8   3   96.99   26.80
   2   8  -3  130.69   18.70
  -2  -8  -3  147.59   14.10
   2  -8   3  102.09   11.40
   2  -8  -3  113.29   13.10
  -2   8  -3   99.19   18.50
   3  -8   3   56.19   10.10
  -3   8   3   64.29   12.70
  -3   8  -3   99.89   17.50
   3  -8  -3   70.39   11.80
   4   8  -3   36.50   18.50
   4  -8   3   60.89   10.60
   4  -8  -3   62.29    8.50
   5  -8  -3  214.48   11.30
   6   8  -3   15.90    5.80
   6  -8  -3   29.10    5.20
   0   9  -3   60.09   12.00
   0  -9  -3   81.69   12.00
   0  -9   3   82.59   10.40
  -1   9   3  108.29   14.70
   1  -9   3  143.49   11.60
   1   9  -3  116.89   18.20
  -1  -9  -3  157.58   12.50
  -1   9  -3   70.79   14.20
   1  -9  -3  112.89   13.10
   1   9   3   96.99   18.60
  -2   9   3    7.60   11.70
   2  -9   3   38.60    7.60
   2   9  -3   19.50   11.90
   2  -9  -3   25.50    8.10
  -2   9  -3    1.50   12.70
   2   9   3   20.90   11.10
   3  -9   3  133.29   10.30
   3   9  -3   87.49   18.10
  -3   9   3  144.99   15.80
   3  -9  -3  150.48   11.30
  -3   9  -3  163.98   18.20
   4   9  -3    9.20   12.40
   4  -9  -3   17.90    5.60
   4   9   3   16.30   12.30
   0  10  -3   68.39   14.70
   0  10  -3   55.79   11.40
   0  10   3   42.00    9.70
   1  10  -3   84.59   14.90
  -1  10   3   97.19   14.20
   1  10  -3   59.99   15.20
   1 -10  -3   96.79    8.70
   1  10   3   90.89   13.30
  -1  10  -3   80.69   17.10
   2  10  -3   14.20   12.10
  -2  10   3   35.90    9.70
   2  10   3   40.40   10.60
   2 -10  -3   15.00    5.60
  -2  10  -3   19.30    9.90
   0   0   4  220.18    9.10
  -1   0   4  255.47   13.70
   1   0  -4  298.37   13.00
   1   0   4  293.97   13.40
   1   0   4  295.97    8.50
   2   0  -4 1045.70   28.70
   2   0   4 1030.20   29.30
  -2   0   4  996.10   29.30
  -3   0   4 2328.37   56.79
   3   0   4 2353.66   56.79
   3   0  -4 2271.37   55.19
  -4   0   4   20.20   10.60
   4   0   4   18.50   12.20
   4   0  -4    7.70   10.60
   5   0   4   46.00   14.90
  -6   0  -4  994.50   31.10
  -6   0  -4 1037.30   26.50
  -6   0   4 1029.50   27.10
  -6   0   4 1008.90   31.20
  -7   0  -4    2.80    9.20
  -7   0  -4   -1.00   14.40
  -7   0   4   12.90   15.80
  -7   0   4    8.70   10.60
  -8   0  -4  108.89   16.40
   8   0   4  113.99   11.30
  -8   0  -4  107.69   15.20
   8   0  -4  130.09   13.60
  -8   0   4  115.49   12.80
   9   0  -4    5.90    6.40
   9   0   4    6.10    7.10
  -9   0   4   12.20    9.70
   0   1   4   17.90    7.20
   0  -1   4   21.50    6.60
   0  -1   4   14.10    5.20
  -1   1   4  365.86   16.70
   1  -1   4  386.16   16.50
   1  -1  -4  362.76   16.70
  -1  -1   4  335.67   17.20
  -2   1   4 4056.19   89.29
   2   1  -4 4056.39   85.39
   2  -1   4 4237.48   90.79
   2   1   4 4019.50   86.09
  -2  -1   4 4049.09   88.39
   2  -1  -4 3978.60   88.09
   3   1  -4  447.26   16.60
   3   1  -4  438.66   17.90
  -3   1   4  464.95   21.00
   3  -1   4  504.85   24.30
   3   1   4  564.44   20.50
   3  -1  -4  552.14   25.90
  -3  -1   4  598.34   25.60
  -4   1   4   83.29   12.90
   4  -1   4   55.99   13.50
   4  -1  -4   53.29   12.30
  -4  -1   4   68.39   13.00
   4   1   4  123.29   17.70
   5  -1   4  508.65   30.10
   5  -1  -4  483.95   29.90
   6  -1   4   86.99   19.90
  -6   1   4  146.79   17.70
  -6   1   4  150.18   14.60
   6  -1   4  128.29   11.00
  -6  -1  -4  145.69   14.90
  -6  -1  -4  143.09   12.70
  -6   1  -4  129.19   12.70
  -6  -1   4  128.29   15.20
  -6  -1   4  117.29   15.20
   6  -1  -4  117.19   11.80
  -6   1  -4  141.09   19.00
   7  -1   4   28.90    7.70
  -7  -1  -4   19.70   11.00
  -7   1   4    9.10   10.50
  -7  -1  -4   20.40   10.80
  -7   1   4   29.30   15.80
  -7   1  -4   38.20    9.90
   7  -1  -4   19.40    7.80
  -7  -1   4   19.50   10.30
  -7  -1   4   10.90   11.30
  -7   1  -4   41.60   14.50
  -8  -1  -4  166.58   15.40
   8  -1   4  163.38   10.90
   8   1  -4  169.78   13.70
  -8   1   4  146.59   21.50
  -8   1   4  169.98   16.00
  -8   1  -4  164.18   22.80
   8  -1  -4  149.29   14.60
  -8  -1   4  171.78   18.00
  -8   1  -4  182.58   15.00
   8   1   4  160.08   13.00
  -9  -1  -4   21.60    9.10
  -9   1   4   36.70    9.50
   9   1  -4   28.30    7.40
  -9  -1   4   27.20   10.00
   9   1   4   25.90    6.80
   9  -1  -4   15.10    6.80
  -9   1  -4   14.60   13.30
   0  -2   4 4900.71  102.39
   0   2  -4 4929.71  104.79
   1   2  -4 1518.55   37.90
  -1   2   4 1502.45   37.60
   1  -2   4 1370.66   37.30
   1  -2  -4 1499.05   39.20
  -1   2  -4 1481.25   37.00
   2  -2   4 1395.46   39.30
  -2   2   4 1369.46   37.70
   2   2  -4 1462.25   37.30
   2  -2  -4 1359.56   40.00
  -2   2  -4 1456.55   36.50
  -2   2  -4 1371.26   31.20
  -3   2   4 6419.06  135.09
   3   2  -4 6130.99  133.39
   3  -2   4 6118.29  137.29
   3  -2  -4 5692.43  124.69
   3   2   4 5474.75  119.29
   3   2   4 5659.53  119.09
  -4   2   4  133.19   16.00
   4  -2   4  123.09   20.40
   4  -2  -4  115.89   16.40
   5  -2   4   -8.30   15.80
   5  -2  -4    1.20   14.50
  -6  -2  -4  513.05   21.20
   6  -2   4  478.75   16.80
  -6  -2  -4  481.95   18.10
  -6   2   4  482.05   18.00
  -6   2   4  495.95   24.80
  -6  -2   4  468.05   20.80
   6  -2  -4  442.76   16.60
  -6  -2   4  472.45   19.60
  -6   2  -4  440.96   24.40
  -7  -2  -4   29.20   11.60
   7  -2   4   37.40    8.00
  -7  -2  -4   37.90   11.40
  -7   2   4   57.69   16.80
  -7   2   4   51.09   10.40
   7  -2  -4   30.90    8.20
  -7  -2   4   61.59   12.30
  -7   2  -4   24.70   15.40
  -7  -2   4   38.80   12.00
  -8   2   4   13.10   10.00
  -8  -2  -4   16.40   11.10
   8  -2   4   16.30    7.00
  -8  -2  -4   13.20    9.60
  -8   2   4   14.60   15.90
  -8  -2   4    2.50   11.20
   8  -2  -4    4.40    7.80
  -8  -2   4    9.50   11.80
  -8   2  -4    4.60   16.70
  -9  -2  -4   62.59    9.30
   9   2  -4   48.70    7.90
  -9   2   4   52.99   13.50
  -9   2  -4   56.79   13.90
   9  -2  -4   47.20    7.10
   9   2   4   51.49    8.50
  -9  -2   4   40.70    9.50
   0  -3   4 2293.67   52.39
   0   3  -4 2276.77   56.09
  -1   3   4 1831.82   46.40
   1   3  -4 1734.33   46.50
   1  -3   4 1733.63   45.50
   1  -3  -4 1769.12   46.80
  -1   3  -4 1716.43   44.40
  -2   3   4  784.92   26.30
   2  -3   4  707.33   27.90
   2   3  -4  696.33   29.10
  -2   3  -4  606.04   23.20
   2  -3  -4  655.13   27.60
  -2   3  -4  674.13   20.00
   3   3  -4  100.79   17.70
   3  -3   4   93.49   15.70
  -3   3   4  109.79   14.70
   3   3   4   65.09   12.10
   3  -3  -4   81.99   15.30
   4  -3   4  211.78   25.80
   4  -3  -4  194.08   23.60
   5  -3   4  905.61   43.10
  -5  -3  -4  864.01   23.30
  -5  -3  -4  911.51   25.50
  -5   3   4  878.21   28.50
  -5  -3   4  902.91   27.40
   5  -3  -4  880.61   23.60
  -5  -3   4  847.92   23.60
  -5   3  -4  918.61   28.20
   6  -3   4  237.98   12.50
  -6  -3  -4  240.78   15.30
  -6  -3  -4  252.07   18.80
  -6   3   4  217.88   20.60
  -6   3  -4  233.48   22.90
  -6  -3   4  212.28   17.80
  -6  -3   4  239.78   15.10
   6  -3  -4  226.28   13.20
   7  -3   4  129.89   11.60
  -7  -3  -4  108.79   18.00
  -7   3   4   96.59   17.50
  -7  -3  -4  124.39   15.10
   7  -3  -4  102.99   12.40
  -7   3  -4   92.29   16.70
  -7  -3   4  126.69   16.30
  -7  -3   4   83.19   12.10
  -8   3   4  143.89   17.70
  -8  -3  -4   98.49   12.90
  -8  -3  -4  129.99   14.60
  -8   3  -4  107.69   17.30
  -8  -3   4  112.19   13.30
   8  -3  -4  134.29   12.10
  -8  -3   4  119.59   17.00
  -9  -3  -4   85.29   12.50
   9   3  -4  113.99    9.00
  -9   3   4   97.69   13.50
  -9  -3  -4   89.09   12.10
  -9  -3   4   86.19   10.50
   9  -3  -4   93.59    8.50
  -9   3  -4   55.99   13.00
  -9  -3   4   92.09   11.80
   9   3   4  102.59    8.80
   0   4  -4   10.50   13.20
   0  -4   4    9.80    7.70
   1   4  -4 1453.95   44.20
   1  -4   4 1414.46   41.90
  -1   4   4 1429.26   42.50
   1  -4  -4 1478.85   45.70
  -1   4  -4 1431.86   42.90
   2  -4   4  630.94   28.30
   2   4  -4  637.84   30.10
  -2   4   4  631.54   27.10
   2   4   4  603.24   28.50
   2  -4  -4  674.53   32.20
  -2   4  -4  618.24   25.90
   3  -4   4  935.61   37.20
   3   4  -4  856.61   34.30
  -3   4   4  948.41   34.50
   3  -4  -4  832.02   36.60
   3   4   4  847.22   33.60
   4  -4   4    1.30   17.00
   4  -4  -4    5.60   15.00
  -5   4   4   98.19   13.40
  -5  -4  -4   92.59   14.00
  -5  -4  -4   88.09   11.50
   5  -4   4   80.09   10.40
   5  -4  -4   81.39    9.40
  -5  -4   4   75.69   12.50
  -5   4  -4   86.59   13.70
  -5  -4   4   67.69    9.30
  -6  -4  -4  200.58   19.10
  -6   4   4  232.58   23.80
   6  -4   4  222.58   12.60
  -6  -4  -4  241.98   15.90
   6   4  -4  210.48   13.10
  -6  -4   4  222.48   19.70
  -6   4  -4  215.68   22.50
  -6  -4   4  215.78   15.60
   6  -4  -4  220.58   14.00
  -7   4   4    6.20   17.40
  -7  -4  -4   17.70   11.70
   7  -4   4   23.10    7.20
  -7  -4  -4   17.10    9.90
  -7  -4   4    2.50   12.70
   7  -4  -4   29.50    8.40
  -7  -4   4   27.60   10.80
  -7   4  -4   24.90   15.00
  -8  -4  -4  111.29   18.40
  -8   4   4  144.29   22.60
  -8  -4  -4  126.39   14.20
  -8   4  -4  153.28   21.30
  -8  -4   4  130.69   17.00
   8  -4  -4  131.39   10.50
  -8  -4   4  139.59   14.70
   0   5  -4  803.12   34.60
   0   5   4  851.71   34.30
  -1   5   4  189.28   20.20
  -1   5   4  162.98   20.90
   1   5  -4  189.18   22.80
  -1   5  -4  173.98   21.20
   1   5   4  218.28   24.10
   1  -5  -4  187.38   23.50
  -2   5   4  114.19   19.60
   2   5  -4   64.79   18.40
  -2   5   4   74.19   13.60
   2  -5   4   60.29   16.00
   2   5   4   62.99   17.10
  -2   5  -4   66.09   15.20
   2  -5  -4   53.99   15.00
  -3  -5  -4  457.45   17.00
   3   5  -4  478.15   32.50
   3  -5   4  484.25   30.90
   3  -5  -4  469.05   15.90
   3   5   4  480.35   31.90
   3  -5  -4  459.15   31.20
  -4   5   4  237.38   18.30
   4  -5   4  240.08   11.80
  -4  -5  -4  243.58   15.30
  -4   5  -4  227.88   18.80
   4  -5  -4  246.08   12.80
  -4  -5   4  268.77   17.70
   5  -5   4  297.87   13.80
  -5  -5  -4  314.67   19.10
  -5   5   4  284.87   23.90
  -5  -5  -4  328.37   16.30
  -5   5  -4  327.77   22.30
  -5  -5   4  288.87   20.40
   5  -5  -4  284.07   12.80
  -6   5   4  162.68   24.70
  -6  -5  -4  176.98   14.80
  -6  -5  -4  146.89   18.60
   6  -5   4  174.08   12.40
   6  -5  -4  161.68   12.30
  -6   5  -4  143.69   22.00
  -6  -5   4  182.18   18.90
  -7  -5  -4   69.99   13.50
  -7   5   4  100.49   16.80
  -7  -5  -4  113.79   15.20
   7  -5  -4  106.89   10.50
  -7  -5   4   83.29   13.60
  -7   5  -4   97.49   16.00
  -8  -5  -4   23.20   10.30
  -8   5   4   26.50   14.20
  -8  -5  -4   50.09    7.80
  -8   5  -4   37.90   12.90
   8  -5  -4   41.90    5.70
  -8  -5   4   28.20   10.20
   0  -6  -4  163.48   10.60
   0   6  -4  143.79   28.90
   0   6   4  176.48   25.30
   0   6   4  131.69   28.80
   1   6  -4  862.51   41.60
  -1   6   4  806.32   37.30
  -1  -6  -4  788.92   21.60
  -1   6   4  813.02   37.00
   1   6   4  864.01   41.90
  -1   6  -4  804.12   40.90
   1  -6  -4  757.72   21.10
  -1  -6   4  750.82   20.50
   2  -6   4  130.09   10.40
   2   6  -4  154.68   28.00
  -2   6   4  199.88   25.20
  -2  -6  -4  134.69   10.50
   2   6   4  186.78   30.10
  -2  -6   4  131.49   10.70
   2  -6  -4  135.59   11.40
   2  -6  -4  148.09   21.80
  -2   6  -4  205.88   26.70
   3  -6   4   66.99    8.70
   3   6  -4   63.79   23.70
   3   6   4  122.19   25.00
   3  -6  -4   90.49   10.20
  -3   6  -4  111.79   15.30
   4  -6   4  162.18   11.50
  -4  -6  -4  167.68   17.60
   4  -6  -4  150.88   12.70
  -4  -6   4  148.89   17.90
  -5  -6  -4  167.28   17.00
   5  -6   4  140.39   12.20
  -5   6   4  155.88   23.80
   5  -6  -4  128.49   12.80
  -5  -6   4  156.58   19.60
  -6  -6  -4   19.30   12.20
  -6   6   4    6.30   16.30
  -6  -6   4   14.30   12.30
   6  -6  -4    1.50    7.20
  -6   6  -4   -4.60   13.90
  -7   6   4   35.80   13.00
  -7  -6  -4   39.00   11.50
  -7   6  -4   41.90   12.20
  -7  -6   4   39.10   11.10
   7  -6  -4   42.70    7.10
   0   7  -4    7.40   24.70
   0   7   4   23.00   22.50
   0  -7  -4   33.50    8.40
   0  -7   4   12.40    7.20
  -1   7   4   80.79   24.40
   1  -7   4   46.30    7.30
   1   7  -4   39.90   12.80
   1   7  -4   49.50   26.00
  -1  -7  -4   50.49    9.60
  -1  -7   4   43.20    8.10
  -1   7  -4   46.60   23.80
   1  -7  -4   39.50    8.70
   1   7   4   45.40   25.20
  -1   7  -4   40.80   12.80
  -2   7   4  196.18   31.20
   2   7  -4  215.88   19.90
   2  -7   4  236.38   12.90
   2   7  -4  184.78   38.30
  -2  -7  -4  241.38   13.60
   2  -7  -4  188.78   14.10
  -2   7  -4  209.88   30.20
   2   7   4  160.88   31.00
  -2   7  -4  168.88   20.00
  -2  -7   4  215.38   13.60
   3   7  -4  166.58   34.70
   3  -7   4   95.59   11.00
   3   7   4   98.09   24.60
  -3   7  -4   47.90   11.00
   3  -7  -4   69.49   12.20
   4  -7   4    9.10    7.80
   4  -7  -4   14.20    8.20
   5  -7  -4  252.17   14.10
  -6  -7  -4  102.39   11.80
   6   7  -4   99.79   11.20
  -6  -7   4   90.99   15.20
   6  -7  -4   87.09   10.20
  -7  -7  -4   92.29   12.40
   7  -7  -4  112.99    8.20
  -7  -7   4  105.69   12.30
   0  -8  -4  331.97   15.80
   0   8  -4  263.67   19.30
   0  -8   4  337.07   14.90
   0   8  -4  295.97   37.00
   0   8   4  323.27   35.30
   1   8  -4  338.47   35.20
   1   8  -4  300.37   21.20
  -1  -8  -4  342.57   15.80
   1  -8   4  326.67   14.50
  -1   8   4  338.17   36.80
   1   8   4  324.17   38.70
  -1   8  -4  302.87   39.50
  -1   8  -4  274.27   19.50
  -1  -8   4  286.67   13.60
   1  -8  -4  290.67   14.80
   2  -8   4   46.60    7.90
   2   8  -4   46.30   11.60
  -2  -8  -4   53.49    9.10
   2  -8  -4   70.19    9.60
  -2   8  -4   44.10   11.40
   3  -8   4  122.29   11.60
  -3   8   4  134.09   17.00
  -3   8  -4  150.98   18.70
   3  -8  -4  137.09   12.80
   4  -8   4   32.20    9.10
   4   8  -4   33.90   17.40
   4  -8  -4   23.30    7.60
   5  -8  -4  154.28   11.10
   6   8  -4   30.50    6.00
   6  -8  -4   52.39    7.60
   0  -9   4    2.40    6.50
   0  -9  -4    7.70    7.50
   0   9  -4   -0.50   12.40
   1   9  -4  115.09   19.20
  -1  -9  -4  115.19   11.40
   1  -9   4  107.49   10.20
  -1   9  -4  133.29   21.00
   1  -9  -4  142.19   12.40
   2  -9   4   31.80    7.00
  -2   9   4   23.10   12.20
   2   9  -4   34.70   11.20
   2   9   4   37.20   12.10
  -2   9  -4   20.90   12.70
   2  -9  -4   26.70    8.00
  -3   9   4  148.39   15.00
   3   9  -4  106.89   17.80
   3  -9  -4  133.89   11.40
  -3   9  -4  145.79   17.30
   4   9  -4   27.80   12.90
   4  -9  -4   56.69    8.60
   4   9   4   43.00   11.80
   0 -10  -4   46.70    6.70
   0  10  -4   14.30   13.80
   0  10   4   26.60    9.80
   0  10  -4   22.50   11.20
   1  10  -4   86.89   14.00
   1  10  -4   40.00   14.20
  -1  10   4   56.69   10.10
   1  10   4   65.09   10.80
  -1  10  -4   48.30   11.60
   1 -10  -4   79.79    7.90
  -2  10   4   87.79   15.00
   2 -10  -4   53.59    8.10
  -2  10  -4   63.79   10.30
   0   0   5   12.20    5.70
   1   0   5  299.57    9.70
  -1   0   5  283.37   14.80
   2   0   5   78.59   14.20
   2   0  -5   51.59    9.10
  -2   0   5   45.00   10.40
   3   0   5 2422.86   59.19
  -3   0   5 2487.25   59.69
   3   0  -5 2330.87   57.39
   4   0   5   40.30   12.10
   4   0  -5   43.60   11.50
  -4   0   5   31.70   12.50
   5   0   5  271.47   23.60
  -5   0   5  287.87   31.00
  -6   0   5   44.10   11.40
  -6   0  -5   33.70    9.30
  -6   0  -5   28.80   11.40
  -6   0   5   27.20   10.10
  -7   0  -5  550.34   20.60
  -7   0   5  548.65   20.20
   7   0   5  549.65   18.10
  -7   0  -5  550.44   27.00
  -8   0   5  -12.00   10.50
   8   0  -5    2.40    8.50
  -8   0  -5   16.30    9.80
   8   0   5    2.50    7.40
  -8   0  -5  -13.90   14.80
  -9   0  -5  413.26   17.50
   9   0  -5  438.66   14.50
  -9   0   5  393.06   19.10
   0  -1   5 5373.96  111.79
   0   1   5 5340.57  112.39
   0  -1   5 5499.15  111.39
   1  -1   5 1918.71   45.40
  -1   1   5 1852.81   44.50
   1  -1  -5 2136.99   49.30
  -1  -1   5 2036.80   48.70
   2  -1   5 2239.28   53.79
   2   1  -5 2218.18   51.59
  -2   1   5 2133.19   52.29
   2   1   5 2201.18   51.19
  -2  -1   5 2250.47   53.79
   2  -1  -5 2199.68   53.09
  -3   1   5  143.69   17.40
   3   1  -5  161.28   12.50
   3  -1   5  135.79   18.20
   3   1  -5  141.89   14.50
   3   1   5  154.08   13.40
  -3  -1   5  171.28   17.60
   3  -1  -5  166.38   19.90
   4  -1   5  425.96   27.90
  -4   1   5  416.66   23.10
   4   1   5  436.06   22.10
  -4  -1   5  401.56   25.00
   4  -1  -5  366.56   25.40
   5  -1   5   96.09   16.20
   5  -1  -5   91.09   16.00
   6  -1   5  155.68   23.30
  -6   1   5  216.58   15.00
  -6  -1  -5  220.08   14.80
  -6   1   5  216.18   20.40
  -6  -1  -5  236.48   15.40
   6  -1   5  197.68   11.10
  -6   1  -5  227.68   14.00
   6  -1  -5  239.18   12.10
  -6   1  -5  247.78   17.70
  -6  -1   5  232.48   14.80
  -6  -1   5  237.58   16.80
  -7   1   5  475.15   26.90
  -7  -1  -5  501.65   21.40
  -7   1   5  483.95   20.00
  -7  -1  -5  490.85   20.10
   7  -1   5  502.95   17.00
  -7   1  -5  438.76   17.90
  -7  -1   5  473.65   20.90
   7  -1  -5  487.65   17.90
  -7  -1   5  441.56   20.50
  -7   1  -5  432.46   26.60
  -8   1   5   65.79   15.50
   8  -1   5   34.20    7.20
  -8   1   5   52.09   11.70
  -8  -1  -5   39.20    9.60
   8   1  -5   22.40    8.50
  -8   1  -5   41.50    8.80
  -8   1  -5   30.40   16.40
   8   1   5   33.80    8.30
   8  -1  -5   39.90    9.20
  -8  -1   5   27.50   12.10
  -9   1   5  201.88   14.80
   9   1  -5  181.28   12.40
  -9  -1  -5  171.18   15.30
   9  -1  -5  192.18   12.10
  -9  -1   5  214.38   15.00
  -9   1  -5  216.38   21.60
   0   2   5 1848.02   44.20
   0   2  -5 1798.82   44.50
   0  -2   5 1817.32   41.50
   1  -2   5 2980.40   66.29
  -1   2   5 2863.81   66.09
   1   2  -5 2934.51   66.69
  -1  -2   5 2913.91   61.49
   1  -2  -5 3059.89   69.69
  -1   2  -5 3091.49   67.49
   2   2  -5   99.29   14.20
   2  -2   5   86.89   13.30
  -2   2   5   84.39   12.10
   2  -2  -5   60.29   11.50
  -2   2  -5   85.59   10.20
  -2   2  -5   59.29    5.10
   3  -2   5  295.97   23.00
   3   2  -5  261.77   18.10
  -3   2   5  305.37   20.90
   3  -2  -5  235.28   21.30
   3   2   5  243.08   14.40
  -4   2   5 1100.69   36.20
   4  -2   5 1163.48   41.60
   4  -2  -5 1065.79   39.00
   5  -2   5    2.40   15.40
   5  -2  -5    5.40   13.60
  -6  -2  -5  571.54   21.10
  -6   2   5  550.64   24.80
   6  -2   5  541.15   17.30
  -6   2   5  528.75   18.70
  -6  -2  -5  557.34   18.70
  -6   2  -5  557.74   23.50
  -6  -2   5  565.94   21.50
  -6  -2   5  601.64   19.80
   6  -2  -5  554.54   18.70
   7  -2   5  525.55   17.40
  -7  -2  -5  535.45   21.30
  -7   2   5  534.35   20.00
  -7   2   5  478.85   27.70
  -7  -2  -5  509.55   23.00
  -7  -2   5  437.26   22.90
  -7   2  -5  426.36   25.90
  -7  -2   5  443.36   19.20
   7  -2  -5  442.46   15.90
  -8  -2  -5   -2.80    9.70
  -8  -2  -5   17.80   11.50
  -8   2   5   41.30   10.40
  -8   2   5   -4.90   15.50
  -8  -2   5   27.10   11.40
  -8   2  -5   37.10   16.10
   8  -2  -5   24.00    8.20
  -8  -2   5   37.10   11.90
  -9  -2  -5  266.77   13.50
  -9   2   5  223.78   21.50
  -9  -2   5  229.78   16.30
  -9   2  -5  217.38   22.30
   9  -2  -5  249.88   11.60
   0   3  -5  236.38   17.10
   0  -3   5  227.38   13.70
   1  -3   5  883.11   29.60
  -1   3   5  905.71   30.20
   1   3  -5  886.01   29.80
   1  -3  -5 1009.00   32.30
  -1   3  -5  932.31   29.30
  -2   3   5 2023.80   51.39
   2  -3   5 2051.69   54.59
   2   3  -5 1929.71   51.89
  -2   3  -5 1896.11   48.30
   2  -3  -5 2015.80   53.19
   3  -3   5  372.56   26.90
   3   3  -5  389.96   21.40
  -3   3   5  387.56   21.80
   3   3   5  330.37   19.50
   3  -3  -5  373.96   24.80
   4  -3   5   44.00   16.20
   4  -3  -5   63.79   15.90
  -5  -3  -5  326.17   17.30
   5  -3   5  331.87   33.80
  -5   3   5  335.77   20.00
  -5  -3  -5  336.47   15.90
  -5  -3   5  256.77   13.50
  -5   3  -5  282.97   18.30
  -5  -3   5  256.17   17.80
   5  -3  -5  272.87   12.20
   5  -3  -5  229.38   29.10
  -6  -3  -5   17.50    9.50
  -6  -3  -5    6.50   10.20
   6  -3   5   13.80    7.10
  -6   3   5  -11.20   14.30
  -6  -3   5    2.30   11.70
  -6  -3   5   20.30   10.60
  -6   3  -5   19.30   12.60
   6  -3  -5    8.10    7.70
  -7  -3  -5   86.79   11.60
  -7   3   5   98.69   17.50
  -7  -3  -5   92.09   13.00
  -7   3  -5   92.59   16.10
  -7  -3   5  120.89   15.00
  -7  -3   5  104.19   16.10
   7  -3  -5  103.19   12.90
  -8  -3  -5    9.50    9.90
  -8   3   5   15.10   15.00
  -8  -3  -5    7.80   12.20
  -8  -3   5   20.10   10.70
   8  -3  -5   20.30    7.50
  -8   3  -5   28.30   15.40
  -8  -3   5   12.80   12.80
  -9  -3  -5   26.20    8.40
   9   3  -5   45.60    6.60
  -9  -3  -5   45.10    9.80
  -9   3   5   50.19   13.60
  -9   3  -5   22.10   13.60
  -9  -3   5   56.19    9.80
  -9  -3   5   31.70    8.10
   9  -3  -5   32.10    5.30
   0   4  -5  307.67   21.70
  -1   4   5  992.80   34.00
   1   4  -5  973.70   34.70
   1  -4   5  953.70   32.80
   1  -4  -5  985.90   34.50
  -1   4  -5  986.20   34.50
   2   4  -5  117.39   19.10
   2  -4   5  118.09   18.90
  -2   4   5  136.09   16.40
   2  -4  -5  169.18   22.00
  -2   4  -5  183.28   18.90
   3   4  -5   78.59   16.30
  -3   4   5   88.09   14.90
   3  -4   5   65.99   15.90
   3   4   5   89.49   18.50
   3  -4  -5   71.29   15.80
   4  -4   5   51.39   17.70
   4  -4  -5   54.79   16.40
   4  -4  -5   65.19   12.30
  -5  -4  -5   18.10   10.80
  -5  -4  -5   33.70    9.10
  -5   4   5   25.50   13.00
  -5  -4   5   18.00   11.10
  -5   4  -5   35.10   12.40
  -5  -4   5   33.10    9.00
   5  -4  -5   18.70    8.30
  -6  -4  -5   35.10   12.60
   6   4  -5   44.40    9.10
  -6   4   5   38.60   14.10
  -6  -4  -5   64.39   10.80
  -6  -4   5   60.59   10.80
   6  -4  -5   59.09    9.10
  -6   4  -5   71.19   14.30
  -6  -4   5   47.60   13.10
  -7   4   5  493.55   30.90
  -7  -4  -5  492.05   22.70
  -7  -4  -5  494.15   19.60
  -7  -4   5  489.75   23.90
  -7  -4   5  514.35   19.90
   7  -4  -5  478.25   17.80
  -7   4  -5  484.45   26.70
  -8   4   5   67.79   17.20
  -8  -4  -5   53.39   11.70
  -8  -4  -5   83.69   13.50
  -8  -4   5   52.79   11.90
  -8   4  -5   73.59   15.20
   8  -4  -5   80.69   10.00
  -8  -4   5   84.09    9.70
   0   5  -5  565.14   30.10
   0   5   5  589.64   27.70
  -1   5   5  466.75   27.70
   1   5  -5  495.45   29.90
   1   5   5  477.45   27.80
  -1   5  -5  491.65   28.20
   2   5  -5  169.08   24.10
  -2   5   5  194.98   20.40
  -2   5   5  180.88   20.50
   2  -5   5  121.49   21.60
   2   5   5  210.88   25.30
  -2   5  -5  171.58   22.30
   2  -5  -5  138.59   22.60
   3   5  -5  178.58   24.40
  -3  -5  -5  129.09   10.80
   3  -5   5   88.19   18.50
   3  -5  -5  129.89    9.50
   3  -5  -5   87.99   19.40
   3   5   5  133.99   21.90
  -4   5   5   95.89   13.60
   4  -5   5   69.89    8.90
  -4  -5  -5   71.89   10.70
   4  -5  -5  108.19   11.00
  -4  -5   5   98.79   17.00
  -4   5  -5  122.89   17.00
  -5   5   5  117.59   16.50
  -5  -5  -5  116.39   17.70
  -5  -5  -5  130.59   13.60
  -5   5  -5  115.19   14.90
  -5  -5   5   72.99   12.70
   5  -5  -5   97.79   10.00
  -6  -5  -5  392.06   21.10
  -6   5   5  349.17   25.60
  -6  -5  -5  358.46   17.90
   6  -5  -5  372.46   15.30
  -6   5  -5  352.16   25.20
  -6  -5   5  316.87   22.20
  -7  -5  -5   83.29   10.70
  -7  -5  -5   34.30   11.80
  -7   5   5   73.49   17.20
  -7  -5   5   84.69   13.00
   7  -5  -5   86.59   10.40
  -7   5  -5   85.49   15.30
  -8  -5  -5   52.99    8.50
  -8  -5  -5   57.59   10.10
  -8   5   5   34.50   14.70
   8  -5  -5   54.49    8.30
  -8  -5   5   61.09   10.60
  -8   5  -5   60.09   12.40
   0   6   5  102.79   19.70
   0  -6  -5  119.29   10.00
   0   6  -5  103.89   20.90
   0   6   5  125.69   24.50
  -1   6   5   62.99   16.80
   1   6  -5   61.39   22.10
  -1  -6  -5   37.50    7.50
  -1   6   5   73.59   21.20
  -1  -6   5   25.00    7.00
   1  -6  -5   26.80    7.10
  -1   6  -5   39.90   20.70
   1   6   5   46.20   19.30
  -2  -6  -5  215.58   11.90
   2   6  -5  177.18   32.00
  -2   6   5  229.28   26.70
   2   6  -5  249.38   15.80
  -2   6   5  249.08   25.60
   2  -6   5  219.48   12.00
   2   6   5  248.38   32.30
   2  -6  -5  209.38   10.10
   2  -6  -5  217.18   12.50
  -2   6  -5  234.18   27.40
  -2   6  -5  240.68   16.10
  -2  -6   5  212.38   11.20
   3   6  -5  316.07   32.70
   3  -6   5  248.98   11.80
   3  -6  -5  276.87   13.00
  -3   6  -5  302.07   18.40
   3   6   5  332.87   35.40
   4  -6   5  211.78   11.90
  -4  -6  -5  242.98   16.20
  -4  -6   5  261.57   19.30
   4  -6  -5  227.78   13.90
  -5  -6  -5  291.47   21.10
  -5   6   5  297.07   24.50
   5  -6  -5  259.07   14.80
  -5  -6   5  282.57   18.90
   6   6  -5   31.70    8.60
  -6   6   5   33.70   15.40
  -6  -6  -5   26.10   11.70
  -6  -6   5   15.70   11.40
   6  -6  -5   16.90    7.70
  -6   6  -5   28.90   13.90
  -7   6   5   90.39   14.40
  -7  -6  -5   62.49   11.60
  -7   6  -5   83.89   12.40
  -7  -6   5   50.49   11.50
   7  -6  -5   98.89    9.90
   0  -7   5   17.30    7.50
   0   7   5   25.60   24.20
   0  -7  -5   28.40    8.40
   0   7  -5   27.50   12.90
   0   7  -5   44.10   22.80
   1  -7   5  361.16   14.70
   1   7  -5  358.96   22.20
  -1   7   5  471.05   35.60
  -1  -7  -5  387.86   15.60
   1   7  -5  398.26   40.00
  -1   7  -5  384.46   37.60
   1   7   5  378.66   35.60
  -1  -7   5  373.96   14.70
   1  -7  -5  357.16   16.00
  -1   7  -5  349.17   22.30
   2   7  -5  166.18   18.50
  -2   7   5  187.68   32.50
   2   7  -5  173.68   37.20
   2  -7   5  155.78   11.50
  -2  -7  -5  164.28   12.90
   2  -7  -5  137.59   13.80
   2   7   5  161.78   29.90
  -2   7  -5  137.49   18.60
  -2  -7   5  154.78   11.20
   3  -7   5   20.20    7.60
   3   7  -5   52.49   24.80
  -3   7  -5   24.50   12.40
   3   7   5   24.70   24.10
   3  -7  -5   16.40    8.70
   4   7  -5   52.99   18.10
   4  -7  -5   32.90    8.70
   5  -7  -5   73.19   11.30
   6   7  -5  135.99   12.10
  -6  -7  -5  132.59   16.50
   6  -7  -5  122.39   10.80
  -6  -7   5  115.29   15.30
   7  -7  -5    9.20    4.60
   0   8  -5  173.38   35.60
   0  -8   5  112.99   11.10
   0   8  -5   85.09   15.30
   0  -8  -5  107.59   13.20
   0   8   5  140.89   28.90
   1   8  -5  129.79   30.20
   1  -8   5   77.59   11.70
   1   8  -5   68.59   14.00
  -1  -8  -5   80.59   12.90
   1  -8  -5   59.59    9.30
  -1  -8   5   59.59   10.20
  -1   8  -5   66.19   13.30
   1   8   5   84.79   41.30
   2  -8   5  306.77   14.40
   2   8  -5  338.37   21.10
  -2  -8  -5  303.37   15.40
  -2   8  -5  328.67   21.00
   2  -8  -5  305.67   15.50
   3  -8   5   64.89   10.50
   3  -8  -5   73.39   11.90
  -3   8  -5   82.79   17.30
   4   8  -5   65.99   18.30
   4  -8  -5   83.69   11.70
   5  -8  -5   47.20    6.90
   6   8  -5  103.09    8.10
   6  -8  -5  126.29    7.90
   0  -9  -5  141.99   12.00
   0   9  -5  105.29   15.80
   0  -9   5  131.29   10.70
   1   9  -5  166.78   18.90
  -1  -9  -5  165.98   11.80
   1  -9   5  162.48   12.00
  -1   9  -5  141.99   19.60
  -1   9  -5  181.98   21.60
   1  -9  -5  178.38   12.60
  -2   9   5   50.59   12.70
   2   9  -5   22.00   17.70
   2   9  -5   61.99   12.40
   2  -9   5   71.19   12.60
   2   9   5   59.59   12.00
   2  -9  -5   61.49    8.40
  -2   9  -5   42.30   13.00
   3   9  -5   24.90   16.40
  -3   9   5   46.40   10.80
   3  -9  -5   25.60    7.00
  -3   9  -5   33.80   11.80
   4   9  -5  102.99   20.70
   4  -9  -5  152.78    9.60
   0  10  -5    2.30   10.50
   0  10   5   -7.90    9.70
   0  10  -5   17.30   13.10
   0 -10  -5    7.00    5.90
   1  10  -5   24.70    9.00
   1  10  -5   13.70   12.60
  -1  10   5   25.20    9.90
  -1  10  -5   21.20   10.50
   1 -10  -5   49.60    7.70
   1  10   5   26.00    8.30
  -2  10   5  115.49   14.70
   2  10  -5   47.20   12.60
   2 -10  -5   79.39    7.60
  -2  10  -5   72.89   12.60
   0   0   6 1929.21   42.80
   1   0   6 4163.78   85.99
  -1   0   6 4219.38   89.59
  -2   0   6 1920.01   48.40
   2   0   6 2046.90   48.50
   2   0  -6 1930.51   46.70
   2   0   6 1991.20   41.60
   3   0  -6  905.51   29.10
  -3   0   6  976.50   31.40
   3   0   6  942.61   31.20
   4   0   6  287.67   20.40
   4   0  -6  257.37   19.50
  -4   0   6  242.88   21.20
   5   0   6   21.20   13.90
  -5   0   6   21.40   13.60
  -6   0  -6   82.49   10.20
  -6   0  -6   66.89   13.50
  -6   0   6   66.79   10.60
  -6   0   6   63.39   11.60
  -7   0   6  124.99   16.30
   7   0   6  123.39   12.30
  -7   0  -6  100.49   15.40
   7   0  -6  124.29   11.10
  -7   0  -6  141.69   21.50
   8   0  -6   65.09    9.60
  -8   0  -6   96.09   17.50
  -8   0   6   72.49   12.00
  -8   0  -6   77.09   10.10
   9   0  -6   43.90    7.00
  -9   0   6   67.19   10.70
  -9   0  -6   66.79    8.80
   0   1   6 7579.84  155.68
   0  -1   6 7545.84  154.88
  -1   1   6  963.90   29.00
   1   1  -6  938.71   28.40
   1  -1   6  952.60   27.40
  -1  -1   6  908.31   28.60
   1  -1  -6 1005.80   28.80
  -2   1   6  627.54   23.90
   2   1  -6  654.63   23.30
   2  -1   6  635.54   24.40
   2   1   6  690.23   23.30
  -2  -1   6  758.72   27.60
   2  -1  -6  726.53   25.40
  -3   1   6  252.97   17.90
   3   1  -6  231.38   15.30
   3  -1   6  277.27   20.80
   3   1  -6  242.78   13.70
   3   1   6  246.68   17.90
  -3  -1   6  266.07   19.70
   3  -1  -6  269.37   21.70
  -4   1   6  104.29   18.10
   4  -1   6   67.39   14.60
   4   1   6  161.08   17.80
  -4  -1   6  122.29   20.80
   4  -1  -6  124.29   16.50
   5  -1   6  159.58   23.50
   5  -1  -6  125.09   22.30
  -6   1   6 1390.46   39.70
  -6   1   6 1414.26   34.80
  -6  -1  -6 1379.96   35.20
  -6  -1  -6 1421.06   34.00
  -6  -1   6 1401.26   36.00
  -6   1  -6 1341.97   33.40
  -6   1  -6 1453.15   39.10
  -6  -1   6 1404.96   34.70
   6  -1  -6 1379.66   33.50
  -7   1   6   50.59   10.50
  -7  -1  -6   40.20    9.80
  -7  -1  -6   50.69   11.40
  -7   1   6   68.29   16.20
  -7  -1   6   50.89   11.40
   7  -1  -6   79.39   10.90
  -7   1  -6   68.49   10.30
  -7  -1   6   58.59   11.40
  -7   1  -6   52.79   16.20
  -8   1   6    4.70   14.40
  -8   1   6    3.10   10.80
  -8  -1  -6   15.70   10.10
   8   1  -6   11.20    8.50
  -8   1  -6    9.00   15.30
  -8  -1   6    7.60   10.80
   8   1   6   11.80    7.10
  -8   1  -6   10.30    8.70
   8  -1  -6    1.50    8.40
   9   1  -6   -0.70    6.80
  -9   1   6    6.30    9.50
  -9  -1  -6   16.80    8.30
  -9  -1   6    1.00    9.40
  -9   1  -6    8.30   14.40
   9  -1  -6    7.20    6.60
   0   2  -6 1842.12   46.60
   0   2   6 1933.01   46.10
   0  -2   6 1905.21   43.60
   1  -2   6 3535.45   78.69
   1   2  -6 3607.34   79.39
  -1   2   6 3457.95   78.69
  -1  -2   6 3428.26   71.39
  -1   2  -6 3518.95   77.29
   1  -2  -6 3463.05   79.09
  -2   2   6 3895.61   86.59
   2   2  -6 3889.51   86.39
   2  -2   6 3779.72   87.79
   2  -2  -6 3678.63   83.69
  -2  -2   6 3598.24   82.99
  -2   2  -6 3566.34   79.09
   3   2  -6   64.39   12.90
   3  -2   6   60.59   14.40
  -3   2   6   56.29   14.10
   3   2   6   75.39   12.20
   3  -2  -6   67.89   14.20
   4  -2   6  148.59   25.60
  -4   2   6  139.49   17.60
   4  -2  -6  184.68   21.90
   5  -2   6   35.90   16.80
   5  -2  -6   37.00   16.60
  -6   2   6   29.00   12.50
  -6   2   6   26.10    9.00
  -6  -2  -6   21.10   10.20
  -6  -2  -6   35.50   10.00
  -6  -2   6   15.30   11.00
   6  -2  -6   18.30    7.30
  -6   2  -6   29.90   12.90
  -6  -2   6   26.50    9.90
  -7   2   6  141.19   24.90
  -7   2   6  158.38   15.60
  -7  -2  -6  166.88   17.60
  -7  -2  -6  153.08   14.60
  -7  -2   6  152.68   17.70
   7  -2  -6  152.68   13.10
  -7   2  -6  186.98   24.90
  -7  -2   6  149.09   18.30
  -8   2   6    8.30   16.00
  -8  -2  -6   25.50   11.20
  -8   2   6   19.10   10.20
  -8  -2  -6   32.00    9.50
  -8   2  -6   -1.90   15.30
   8  -2  -6   23.80    8.60
  -8  -2   6   29.20   11.40
  -8  -2   6   26.00   11.40
  -9  -2  -6   12.30    8.20
   9   2  -6   13.00    6.60
  -9   2   6   13.20   12.80
   9  -2  -6    3.50    6.20
  -9  -2   6    7.30    9.30
  -9   2  -6    9.70   13.90
   0   3   6  174.58   17.20
   0   3  -6  170.18   16.80
   0  -3   6  159.78   12.70
   1   3  -6  607.04   25.50
   1  -3   6  643.94   25.10
  -1   3   6  602.24   24.40
   1  -3  -6  588.04   25.00
  -1   3  -6  579.14   23.00
   2  -3   6  558.24   27.80
   2   3  -6  591.44   26.00
  -2   3   6  609.54   26.40
   2  -3  -6  582.94   27.00
  -2   3  -6  561.84   21.80
   3   3  -6  567.14   26.90
   3  -3   6  539.75   29.00
  -3   3   6  522.55   27.10
   3  -3  -6  546.45   28.20
   4  -3   6  380.56   29.00
   4  -3  -6  287.07   24.80
  -5   3   6   13.60   11.60
  -5  -3  -6   15.40   10.20
  -5  -3  -6   25.40    8.30
   5  -3   6   11.70   18.90
   5  -3  -6   34.00    6.90
  -5  -3   6   17.90    7.50
  -5   3  -6   34.40   13.00
  -5  -3   6   22.30   10.80
   5  -3  -6    9.30   17.70
  -6   3   6   76.49   14.70
  -6  -3  -6  105.59   17.40
  -6  -3  -6  134.39   15.50
   6   3  -6  100.59   11.50
  -6   3  -6   90.09   14.40
  -6  -3   6  122.99   14.50
  -6  -3   6  125.39   14.30
   6  -3  -6  121.69   10.90
  -7  -3  -6   13.40   11.90
  -7   3   6   -5.00   15.10
  -7  -3  -6   10.20   10.50
  -7  -3   6   13.40   12.90
  -7   3  -6    3.30   15.90
  -7  -3   6   32.80   11.70
   7  -3  -6   25.20    8.90
  -8  -3  -6   22.00   11.70
  -8   3   6   27.60   16.70
  -8  -3  -6   29.40   10.30
   8  -3  -6   12.40    7.40
  -8  -3   6   19.60   10.60
  -8  -3   6    3.20   12.10
  -8   3  -6   26.00   15.10
   9   3  -6   27.00    6.30
  -9  -3  -6   49.90    8.80
  -9  -3  -6   25.00    8.40
  -9   3   6   50.09   12.40
  -9  -3   6   22.40    9.10
  -9   3  -6   45.60   13.10
  -9  -3   6   23.80    7.90
   9  -3  -6   34.90    5.50
   0   4   6    0.20   10.90
   0   4  -6    9.50   13.90
   1   4  -6  381.96   23.60
  -1   4   6  338.37   23.30
   1  -4   6  347.87   21.60
  -1   4  -6  352.36   23.10
   1  -4  -6  318.57   23.30
   2   4  -6  379.66   26.80
   2  -4   6  363.16   27.00
  -2   4   6  388.46   23.80
  -2   4  -6  426.56   23.50
   2  -4  -6  380.86   26.30
  -3   4   6  495.05   26.90
   3   4  -6  504.65   27.00
   3  -4   6  500.15   32.40
   3   4   6  463.25   25.70
   3  -4  -6  463.15   32.10
  -4  -4  -6  245.38   23.20
   4  -4   6  188.98   29.00
   4  -4  -6  178.18   10.60
  -4  -4   6  156.18   23.30
   4  -4  -6  158.58   24.60
  -5  -4  -6  174.68   16.60
  -5  -4  -6  168.88   12.90
  -5   4   6  182.58   19.00
  -5  -4   6  179.88   19.10
  -5   4  -6  181.68   20.40
   5  -4  -6  210.38   12.00
   6   4  -6   58.39    8.60
  -6  -4  -6   64.89   10.20
  -6  -4  -6   37.70   12.30
  -6   4   6   60.39   16.00
  -6  -4   6   59.09   10.70
  -6   4  -6   64.69   14.20
  -6  -4   6   44.40   14.20
   6  -4  -6   55.99    8.40
  -7  -4  -6   43.30   10.90
  -7  -4  -6   48.60   13.20
  -7   4   6   41.90   16.60
  -7  -4   6   39.60   12.30
  -7  -4   6   57.59   11.10
   7  -4  -6   36.70    8.40
  -8  -4  -6   30.70   11.10
  -8   4   6   -3.50   15.30
  -8  -4  -6   15.00    9.60
   8  -4  -6    7.50    5.90
  -8  -4   6   -0.20    9.30
  -8  -4   6   17.90   10.90
  -8   4  -6    2.60   14.00
   0   5  -6  273.07   24.20
   0   5   6  305.17   23.10
  -1   5   6  142.29   21.60
   1   5  -6  148.89   22.50
  -1   5  -6  136.09   23.60
   2   5  -6   16.00   16.80
   2  -5   6    9.10   12.30
  -2   5   6   21.00   13.30
   2   5   6   26.70   16.30
  -2   5  -6    7.50   13.50
   2  -5  -6   15.20   14.60
  -3  -5  -6  161.78   11.30
   3  -5   6  128.09   20.60
   3   5  -6  147.59   24.50
   3  -5  -6  157.18    9.90
   3  -5  -6  179.68   25.10
   3   5   6  131.79   25.10
  -4   5   6 1049.09   33.20
  -4  -5  -6 1037.00   29.20
   4  -5  -6  975.30   25.90
  -4   5  -6 1015.10   40.40
  -4  -5   6 1027.70   29.60
  -5   5   6   85.99   15.20
  -5  -5  -6   82.99   12.10
  -5  -5  -6  113.89   13.40
  -5   5  -6  120.99   15.80
   5  -5  -6   83.59   10.00
  -5  -5   6   65.89   13.30
   6   5  -6  163.98   13.50
  -6  -5  -6  169.68   19.10
  -6  -5  -6  216.88   15.20
  -6   5   6  175.38   22.70
  -6   5  -6  126.79   21.70
   6  -5  -6  113.19   11.90
  -6  -5   6  126.69   19.90
  -7   5   6   -2.30   16.40
  -7  -5  -6   19.30   10.10
  -7  -5  -6    4.20   11.90
  -7   5  -6   35.60   14.00
   7  -5  -6   12.50    6.60
  -7  -5   6   -2.40   11.10
  -8  -5  -6    8.40    9.10
  -8  -5  -6    4.30    7.10
  -8   5   6   -5.50   13.90
   8  -5  -6    1.30    4.90
  -8  -5   6    0.50   10.10
  -8   5  -6    1.80   11.20
   0  -6  -6   72.49    9.50
   0   6  -6   97.19   21.90
   0   6   6  107.99   22.10
   0   6  -6   83.09   13.80
   0   6   6   94.09   18.60
  -1   6   6   82.79   22.40
  -1  -6  -6   31.30    7.50
   1   6  -6   51.69   20.50
  -1   6   6   42.20   14.10
   1   6  -6   73.29   14.20
   1  -6  -6   16.90    7.40
   1   6   6   11.40   14.60
  -1  -6   6   18.50    6.30
   1  -6  -6   26.30    6.00
  -1   6  -6   21.00   10.20
   1   6   6   40.60   18.50
  -1   6  -6   41.80   20.90
   2  -6   6  395.16   15.40
  -2   6   6  377.56   28.60
   2   6  -6  402.76   33.40
   2   6  -6  404.36   18.90
  -2   6   6  427.16   32.50
  -2  -6  -6  374.26   14.60
  -2   6  -6  387.56   30.40
  -2  -6   6  352.86   14.30
  -2   6  -6  393.36   19.60
   2   6   6  452.65   36.20
   2  -6  -6  362.56   14.90
   2  -6  -6  372.96   13.20
   3   6  -6  237.58   31.50
  -3   6  -6  192.78   15.00
   3   6   6  242.18   28.00
   3  -6  -6  155.88   11.30
  -4  -6  -6   63.39   11.20
  -4   6   6   28.10   13.60
   4   6  -6   45.40   16.20
   4  -6  -6   73.09    9.40
  -4  -6   6   75.49   11.80
  -5   6   6    3.40   14.10
  -5  -6  -6   33.00   11.60
   5  -6  -6   43.70    9.20
  -5  -6   6   51.79   12.10
   6   6  -6   25.60    9.00
  -6   6   6    6.60   16.50
  -6  -6  -6   34.40   11.60
   6  -6  -6   21.40    7.60
  -6   6  -6   29.70   13.30
  -6  -6   6   31.10   12.20
   7   6  -6   -7.00    6.60
  -7  -6  -6   -4.70    9.90
  -7   6   6    2.90   12.90
   7  -6  -6    7.60    6.30
  -7   6  -6   14.50   11.50
  -7  -6   6  -19.00   10.30
   0   7   6  104.79   28.10
   0   7  -6   53.79   12.00
   0  -7   6   68.19   10.50
   0   7  -6   76.09   26.30
   0  -7  -6   77.89   12.30
   1  -7   6  101.79   10.50
   1   7  -6   87.89   25.70
  -1   7   6  111.09   24.90
   1   7  -6   82.09   15.70
  -1  -7  -6   92.19   11.80
   1   7   6  137.39   29.60
  -1  -7   6  100.19   11.40
  -1   7  -6  101.89   16.30
  -1   7  -6  177.98   33.10
   1  -7  -6  107.49   12.90
   2   7  -6   50.39   24.40
   2   7  -6   41.30   11.80
  -2   7   6   49.50   21.40
   2  -7   6   39.80    7.40
  -2  -7  -6   43.90    8.60
   2   7   6   64.09   24.50
  -2   7  -6   22.70   12.00
   2  -7  -6   38.90    8.90
   3   7  -6  329.47   37.70
  -3   7  -6  337.17   21.90
   3  -7  -6  347.87   16.10
   3   7   6  373.96   39.50
   4   7  -6  197.88   28.90
   4  -7  -6  258.07   14.70
   5  -7  -6  121.39   12.00
  -6  -7  -6   19.70   10.20
   6   7  -6   26.90    8.20
   6  -7  -6   19.60    6.60
  -6  -7   6   31.10   10.00
   7  -7  -6   74.99    7.50
   0   8  -6   39.50   24.50
   0   8  -6  -24.60   11.90
   0  -8  -6    1.30    8.50
   0   8   6   19.30   23.10
   0  -8   6   -2.20    6.70
   1  -8   6   24.10    7.70
  -1  -8  -6   13.50    8.80
   1   8  -6  -11.10   11.50
   1  -8  -6   22.60    8.80
  -1  -8   6   19.90    7.50
  -1   8  -6   -3.70   11.60
   2   8  -6  424.96   24.20
   2  -8   6  431.46   16.10
  -2  -8  -6  415.96   16.90
  -2   8  -6  394.56   24.00
   2  -8  -6  391.06   16.60
   3   8  -6   68.59   18.90
   3  -8  -6   62.29    8.70
  -3   8  -6   84.69   14.00
   4   8  -6  100.09   17.60
   4  -8  -6  156.28   12.40
   5  -8  -6   42.40    6.80
   6   8  -6   96.59    8.40
   6  -8  -6  100.79    7.60
   0  -9  -6   32.40    8.00
   0   9  -6   37.20   16.50
   0   9  -6   11.10   13.10
   0  -9   6   16.90    7.20
   1  -9   6  209.48   11.90
   1   9  -6  212.88   24.80
   1   9  -6  201.98   18.30
  -1  -9  -6  226.08   12.40
  -1   9  -6  235.68   24.70
   1  -9  -6  244.28   13.50
  -1   9  -6  201.88   19.70
  -2   9   6   13.30   11.70
   2   9  -6   -5.80   17.30
   2   9  -6   30.30   11.70
   2  -9  -6   26.70    7.90
   2   9   6   33.50   11.40
  -2   9  -6   13.00   12.70
  -3   9   6   82.19   16.10
   3   9  -6   -4.80   14.60
  -3   9  -6   16.80   11.20
   3  -9  -6   15.70    6.80
   4   9  -6   94.89   14.30
   4  -9  -6  116.19    9.20
   0  10  -6   49.00   10.60
   0  10  -6   27.80   12.50
   0 -10  -6   69.69    8.70
   0  10   6   62.89   10.30
   1  10  -6   24.30   12.60
  -1  10   6   32.40   10.50
   1  10  -6   40.00    8.80
   1  10   6   48.20    9.50
  -1  10  -6   48.40   10.40
   1 -10  -6   52.79    7.40
  -2  10   6   42.90    9.30
   2  10  -6   12.80   12.40
  -2  10  -6   32.60    8.90
   2 -10  -6   36.10    5.30
   1   0  -7  500.15   20.10
  -1   0   7  476.55   19.70
   1   0   7  457.15   13.70
   2   0   7  983.30   29.50
   2   0  -7  937.11   28.50
  -2   0   7  971.50   31.60
   2   0  -7  957.40   28.50
   2   0   7  999.90   22.30
   3   0  -7    7.40   10.30
  -3   0   7   12.60   12.50
   3   0  -7   12.70    9.20
   3   0   7    2.40   10.10
   4   0  -7   -0.30   10.00
   4   0   7  -10.40   12.70
  -4   0   7    3.50   12.20
  -5   0   7  357.76   26.50
   5   0   7  351.26   25.70
  -6   0   7 1165.88   34.80
  -6   0   7 1079.59   28.80
  -6   0  -7 1084.79   28.40
  -6   0  -7 1101.19   31.80
  -7   0  -7   41.50   10.30
  -7   0  -7   61.79   14.80
  -7   0   7   40.80   10.50
   7   0  -7   41.00    8.40
  -8   0  -7   12.80   14.90
  -8   0   7  -11.90   10.90
  -8   0  -7    4.30    9.00
   8   0  -7   19.60    8.70
   9   0  -7   27.90    6.90
  -9   0   7   25.00   10.10
  -9   0  -7   16.30    7.20
   0  -1   7  254.37   14.90
   0   1   7  281.17   15.20
   0   1  -7  304.37   17.70
  -1   1   7 3546.05   79.39
   1  -1   7 3499.65   74.19
   1  -1   7 3653.03   79.29
   1   1  -7 3718.53   79.89
  -1   1  -7 3785.62   80.59
  -1  -1   7 3658.73   81.29
   1   1   7 3576.34   78.39
  -2   1   7 1468.25   39.70
   2  -1   7 1381.56   39.10
   2   1   7 1415.76   37.80
  -2  -1   7 1403.16   40.50
   2  -1  -7 1362.76   38.70
  -3   1   7 1424.96   41.10
   3   1  -7 1351.36   37.70
   3  -1   7 1423.56   42.20
   3   1   7 1468.55   41.60
   3  -1  -7 1467.65   42.80
  -3  -1   7 1525.05   44.00
   4  -1   7  372.56   27.00
  -4   1   7  379.26   21.60
   4  -1  -7  377.86   25.10
  -4  -1   7  362.16   23.60
   4   1   7  388.76   21.40
   5  -1   7  240.78   25.60
   5  -1  -7  176.58   23.50
  -5  -1   7  216.98   23.60
  -6  -1  -7   15.50    9.10
  -6  -1  -7   20.90    9.70
  -6   1   7   28.20   12.90
  -6   1   7   12.60    8.90
  -6  -1  -7    4.80   15.60
  -6  -1   7   14.40   10.20
  -6   1  -7   13.30    8.10
  -6   1  -7    0.90   11.20
   6  -1  -7   -3.00    5.80
  -6  -1   7   18.50   10.50
  -7   1   7  103.89   16.50
  -7  -1  -7  111.79   14.90
  -7  -1  -7  138.49   15.80
  -7   1   7  107.49   15.80
   7  -1  -7  106.69   12.20
  -7  -1   7   79.89   12.10
  -7  -1   7   85.89   12.10
  -7   1  -7   94.09   13.60
  -7   1  -7   99.79   17.00
  -8   1   7   57.99   15.50
  -8   1   7   71.89   12.20
  -8  -1  -7   73.79   10.70
   8   1  -7   83.39   13.00
  -8   1  -7   66.19   16.60
  -8   1  -7   74.29   12.20
  -8  -1   7   64.99   12.60
   8  -1  -7   63.19    9.10
  -9   1   7  203.58   15.60
  -9  -1  -7  189.88   12.20
   9   1  -7  203.18   12.20
   9  -1  -7  187.78   11.40
  -9   1  -7  145.69   21.20
  -9  -1   7  207.28   15.00
   0   2  -7 1377.96   36.60
   0  -2   7 1367.86   33.60
   0   2   7 1362.76   36.40
  -1   2   7  405.46   19.10
   1  -2   7  431.26   19.60
   1   2  -7  412.96   19.60
  -1  -2   7  470.65   21.20
  -1   2  -7  499.35   19.90
   1  -2  -7  495.15   23.40
  -1  -2   7  485.65   14.00
  -2   2   7 2062.99   51.89
   2  -2   7 1930.71   51.49
   2   2  -7 1992.80   50.39
  -2   2  -7 1864.71   46.70
  -2  -2   7 2011.90   52.29
   2  -2  -7 1953.70   51.09
  -3   2   7    6.10   13.20
   3   2  -7   12.30   11.00
   3  -2   7   21.10   13.10
  -3  -2   7    2.00   12.00
   3  -2  -7   10.60   12.50
   3   2   7    1.60    7.90
   4  -2   7  295.67   25.40
  -4   2   7  274.37   21.00
   4  -2  -7  271.57   25.60
  -5  -2  -7  379.46   22.10
   5  -2   7  473.65   31.00
   5  -2  -7  427.66   15.40
  -5   2  -7  429.36   23.10
   5  -2  -7  441.66   30.20
  -6   2   7  258.57   15.50
  -6   2   7  296.87   23.40
  -6  -2  -7  256.27   18.40
  -6  -2  -7  255.47   14.80
   6  -2  -7  272.67   14.60
  -6  -2   7  287.97   18.90
  -6   2  -7  297.47   20.90
  -6  -2   7  274.57   17.50
  -7  -2  -7   59.89    9.80
  -7   2   7   69.19   10.70
  -7  -2  -7   64.69   12.30
  -7   2   7   53.39   16.60
  -7   2  -7   89.49   17.70
  -7  -2   7   26.90   11.60
  -7  -2   7   49.70   12.30
   7  -2  -7   45.70    8.20
  -8   2   7  159.88   26.00
  -8  -2  -7  139.59   16.00
  -8   2   7  188.38   16.90
  -8  -2  -7  193.68   16.90
  -8  -2   7  167.38   18.40
   8  -2  -7  178.08   13.80
  -8  -2   7  164.68   18.70
  -8   2  -7  169.88   23.60
   9   2  -7   -0.60    6.00
  -9   2   7    8.10   12.70
  -9  -2  -7   16.50    8.60
   9  -2  -7    4.50    5.90
  -9   2  -7   11.10   13.20
  -9  -2   7   10.30    8.90
   0  -3   7  238.68   13.10
   0   3   7  230.68   17.60
   0   3  -7  221.48   18.30
  -1   3   7 1113.69   34.00
   1  -3   7 1155.18   33.40
   1   3  -7 1101.49   35.90
  -1   3  -7 1187.28   35.70
   1  -3  -7 1255.27   38.50
  -2   3   7  379.36   24.40
   2  -3   7  390.46   23.40
   2   3  -7  406.56   22.90
  -2   3  -7  437.96   20.80
   2  -3  -7  464.45   25.50
   3  -3   7  378.56   25.90
   3   3  -7  346.87   23.40
  -3   3   7  357.56   23.60
   3  -3  -7  332.77   24.00
  -4   3   7  817.72   34.10
   4  -3   7  798.02   36.40
   4  -3  -7  865.11   36.70
  -5   3   7  215.98   21.80
   5  -3   7  182.48   29.90
  -5  -3  -7  193.88   14.70
  -5  -3  -7  208.08   14.70
  -5  -3   7  209.88   14.10
   5  -3  -7  223.48   26.50
  -5   3  -7  199.48   20.00
  -5  -3   7  211.78   17.70
   5  -3  -7  207.48   12.30
   6   3  -7  460.15   16.40
  -6   3   7  470.15   27.00
  -6  -3  -7  476.45   20.00
  -6  -3  -7  463.65   19.30
  -6  -3   7  545.35   20.70
  -6   3  -7  497.15   26.90
  -6  -3   7  537.25   23.90
   6  -3  -7  536.35   18.50
  -7  -3  -7    8.30    9.80
  -7   3   7    2.20   16.90
  -7  -3  -7    8.00   12.10
  -7   3  -7    4.10   16.50
   7  -3  -7   15.50    8.30
  -7  -3   7   14.80   12.50
  -7  -3   7   26.60   11.50
  -8  -3  -7   29.60    9.30
  -8  -3  -7   40.90   12.00
  -8   3   7   18.50   16.10
  -8  -3   7   29.60   12.00
  -8  -3   7   51.99   11.20
   8  -3  -7   44.90    8.00
  -8   3  -7   62.29   15.70
   9   3  -7  134.69    9.60
  -9   3   7  135.79   19.60
  -9  -3  -7  141.79   11.30
  -9  -3  -7  113.29   12.20
   9  -3  -7  131.29    8.70
  -9   3  -7  148.99   18.40
  -9  -3   7  130.19   10.70
  -9  -3   7   99.19   13.60
   0   4  -7  457.55   25.30
   0   4   7  477.45   24.20
   1  -4   7  226.78   20.80
   1   4  -7  240.68   21.90
  -1   4   7  249.28   20.10
  -1   4  -7  281.97   23.10
  -2   4   7  205.88   21.30
   2  -4   7  185.98   20.80
   2   4  -7  179.28   21.20
   2  -4  -7  264.57   23.80
  -2   4  -7  198.68   20.20
   3   4  -7   76.29   18.00
   3  -4   7   84.09   19.30
  -3   4   7   80.29   15.60
   3   4   7   76.79   15.90
   3  -4  -7  100.99   18.20
  -4  -4  -7   72.49   10.70
   4  -4   7   48.50   17.50
  -4  -4   7   66.19   11.80
   4  -4  -7   42.50    7.20
   4  -4  -7   29.30   16.50
  -5  -4  -7   41.70    8.10
  -5  -4  -7   45.10   11.50
  -5   4   7   36.90   15.00
   5  -4  -7   49.90    7.80
  -5  -4   7   48.70   13.20
  -5   4  -7   29.00   12.70
  -6   4   7  313.37   26.60
   6   4  -7  305.87   15.20
  -6  -4  -7  318.47   17.40
  -6  -4  -7  291.57   19.20
   6  -4  -7  343.77   16.10
  -6  -4   7  341.77   17.60
  -6   4  -7  379.26   24.40
  -6  -4   7  346.17   23.10
  -7  -4  -7   41.10   12.20
  -7  -4  -7   32.10    9.50
  -7   4   7   35.80   17.30
   7  -4  -7   38.80    8.20
  -7  -4   7   15.60   12.40
  -7   4  -7   39.70   15.80
  -7  -4   7   59.89   11.20
  -8  -4  -7  168.88   17.70
  -8   4   7  162.88   26.20
  -8  -4  -7  177.08   15.90
  -8   4  -7  182.98   20.10
  -8  -4   7  217.48   14.80
   8  -4  -7  206.28   10.70
  -8  -4   7  183.18   19.10
   0   5  -7  192.18   22.70
   0   5   7  212.38   21.30
   1   5  -7  464.15   32.10
  -1   5   7  478.05   27.90
  -1   5  -7  453.35   27.70
   2  -5   7  288.37   26.90
  -2   5   7  325.97   25.30
   2   5  -7  327.37   27.60
   2   5   7  285.67   24.50
  -2   5  -7  279.17   25.10
   2  -5  -7  278.97   26.60
  -3   5   7   89.39   17.30
   3  -5   7   65.49   19.00
  -3  -5  -7   84.69   10.40
   3   5  -7  101.99   22.20
   3  -5  -7   74.59    9.90
   3  -5  -7   79.49   19.00
   3   5   7  103.39   19.30
   4   5  -7  100.89   16.70
  -4  -5  -7   95.09   12.50
  -4   5   7   86.49   14.20
  -4  -5  -7  105.19   15.20
  -4  -5   7  111.69   16.70
   4  -5  -7   89.09   11.00
  -5  -5  -7   38.50   10.30
  -5  -5  -7   31.10   11.10
  -5   5   7   26.70   14.60
  -5   5  -7   15.10   12.80
  -5  -5   7   26.60   13.10
   5  -5  -7   17.50    7.90
  -6  -5  -7  392.26   23.20
  -6   5   7  368.46   25.70
  -6  -5  -7  427.56   18.30
   6   5  -7  381.06   15.70
  -6   5  -7  428.46   26.60
  -6  -5   7  382.16   23.10
   6  -5  -7  423.06   16.30
  -7   5   7   19.10   17.20
  -7  -5  -7   15.50    9.40
   7   5  -7   20.50    7.70
  -7  -5  -7   22.20   11.60
   7  -5  -7   17.50    6.60
  -7   5  -7   19.00   14.00
  -7  -5   7    4.30   11.80
  -8   5   7    6.70   13.00
  -8  -5  -7    4.40    8.90
  -8  -5  -7    1.30    7.60
  -8  -5   7    4.00   10.00
   8  -5  -7    9.90    5.10
  -8   5  -7   -0.70   11.30
   0   6  -7  235.88   28.90
   0   6  -7  249.38   18.50
   0   6   7  245.48   31.90
   0   6   7  250.07   28.70
   0  -6  -7  229.98   11.80
   1   6  -7   34.30   10.60
   1   6  -7   33.00   21.10
  -1  -6  -7   27.80    7.40
  -1   6   7   22.40   14.40
  -1   6   7   64.09   21.90
   1   6   7   34.20   17.20
  -1   6  -7   48.30   20.50
   1   6   7   54.79   22.50
   1  -6  -7   47.10    7.30
  -1  -6   7   27.70    5.70
   1  -6  -7   33.10    7.10
  -1   6  -7   49.99   11.20
  -2   6   7  109.29   18.50
   2   6  -7  103.29   23.90
   2   6  -7  120.49   16.50
  -2   6   7  119.19   22.70
  -2  -6  -7  108.09   10.50
   2  -6  -7   79.79    7.80
  -2   6  -7   85.49   15.00
   2   6   7   81.59   21.30
  -2   6  -7   78.49   19.10
   2  -6  -7   89.19   11.20
  -2  -6   7   62.79    9.00
   3   6  -7   18.20   20.50
   3  -6  -7   24.10    7.40
  -3   6  -7   32.60   11.10
   3   6   7   45.80   22.20
   4   6  -7   80.89   19.20
  -4   6   7   54.49   13.80
  -4  -6  -7   76.19   10.80
  -4  -6   7   97.19   16.80
   4  -6  -7   79.79   11.90
  -5  -6  -7  111.19   16.60
  -5   6   7  101.29   15.60
  -5  -6   7   83.79   13.30
   5  -6  -7   63.69    9.80
   6   6  -7  109.99   11.90
  -6  -6  -7  102.39   16.40
  -6   6   7  103.29   16.80
  -6  -6   7  158.48   19.10
  -6   6  -7  133.19   20.70
   6  -6  -7  151.68   11.80
   7   6  -7   42.50    7.10
  -7   6   7   41.70   13.90
  -7  -6  -7   39.20   10.70
  -7   6  -7   61.59   12.90
  -7  -6   7   30.70   10.40
   7  -6  -7   54.09    9.40
   0   7  -7  742.03   28.70
   0  -7  -7  807.92   22.70
   0   7  -7  755.82   43.90
   0   7   7  727.43   43.30
   0  -7   7  781.52   21.20
   1  -7   7   46.30    7.70
   1   7  -7   54.89   27.50
   1   7  -7   47.40   13.60
  -1   7   7   65.99   26.60
  -1  -7  -7   48.00    9.20
   1   7   7  111.19   28.40
  -1   7  -7   65.59   14.80
  -1  -7   7   39.70    7.20
   1  -7  -7   67.99    9.60
  -1   7  -7   64.29   24.00
  -2   7   7   25.70   22.10
   2   7  -7   25.70   12.20
  -2  -7  -7   18.90    8.20
   2   7  -7   37.50   22.80
  -2   7  -7   -5.70   11.40
   2  -7  -7   -2.80    8.80
   2   7   7   45.00   24.50
   3   7  -7  115.89   26.20
  -3   7  -7   79.59   13.60
   3   7   7  118.89   26.70
   3  -7  -7   94.89   13.00
   4   7  -7  131.89   27.20
   4  -7  -7  145.89   13.00
   5   7  -7   31.30   18.70
   5  -7  -7   12.40    7.50
  -6  -7  -7  110.59   17.60
   6   7  -7  137.49   11.40
  -6  -7   7  115.19   15.40
   6  -7  -7  133.39   10.60
   7  -7  -7   76.69    7.30
   0   8  -7  267.37   23.30
   0  -8   7  313.07   13.70
   0  -8  -7  330.27   15.80
   1   8  -7    3.30   13.70
   1  -8   7   32.60    8.60
  -1  -8  -7   42.40    9.20
   1  -8  -7   51.59    9.10
  -1   8  -7   25.10   14.60
  -2  -8  -7   49.10    8.70
   2   8  -7   58.29   13.00
  -2   8  -7   72.79   15.20
   2  -8  -7   73.69   12.60
   3   8  -7   69.89   20.60
   3  -8  -7   72.59   12.00
  -3   8  -7   59.29   13.00
   4   8  -7   24.40   16.80
   4  -8  -7    0.70    7.20
   5   8  -7   97.09   10.80
   5  -8  -7   80.09   10.20
   6   8  -7   42.50    7.10
   6  -8  -7   66.69    7.10
   0   9  -7   76.89   18.40
   0  -9  -7  103.59   11.40
   0   9  -7   62.39   13.90
  -1  -9  -7   44.70    7.60
   1   9  -7    1.70   16.50
   1   9  -7   10.20   12.30
  -1   9  -7   39.80   15.20
   1  -9  -7   53.29    8.70
  -1   9  -7   13.30   12.70
   2   9  -7   43.30   17.70
   2   9  -7   62.19   11.90
  -2   9  -7   24.30   12.40
   2  -9  -7   43.90    7.90
   3   9  -7   16.20   15.60
  -3   9   7   47.70   10.70
  -3   9  -7    5.90   11.00
   3  -9  -7   18.80    6.70
   4   9  -7   12.20   12.60
   4  -9  -7   65.49    8.50
   0  10  -7   50.09   10.10
   0 -10  -7   84.59    8.80
   0  10   7   57.29    9.80
   0  10  -7   24.60   11.70
   1  10  -7   20.20   12.50
   1  10  -7    6.70    8.60
  -1  10   7   10.80    9.90
   1 -10  -7   25.70    5.30
   1  10   7   11.90    9.00
  -1  10  -7   15.00    9.80
  -2  10   7   78.99   12.80
   2  10  -7   39.20   12.40
   2 -10  -7   65.29    7.20
  -2  10  -7   61.09    9.70
   0   0  -8  393.36   19.80
   0   0   8  447.96   16.80
  -1   0  -8  791.12   25.00
   1   0   8  725.13   20.40
   1   0  -8  834.32   27.30
  -1   0   8  897.31   26.80
   2   0   8    3.60    9.70
   2   0  -8    0.50   11.00
  -2   0   8   10.90   10.60
   2   0   8   -0.80    4.00
   3   0  -8 1400.06   37.90
   3   0   8 1477.45   41.80
  -3   0   8 1450.45   42.40
   3   0  -8 1433.56   39.50
   4   0   8   21.10   12.10
   4   0  -8   19.20   11.30
  -4   0   8   30.30   12.80
   5   0   8  395.56   28.90
  -5   0   8  418.16   27.80
  -6   0   8  396.86   18.70
  -6   0  -8  399.66   15.80
  -6   0  -8  384.66   22.00
   7   0  -8   13.30    8.40
  -7   0   8   10.30   11.20
  -7   0  -8   30.60   14.90
  -7   0  -8   -6.60    9.00
  -8   0  -8    0.90   14.60
  -8   0   8   11.70   12.00
   8   0  -8    7.70    7.70
  -8   0  -8   16.20    8.80
  -9   0  -8  186.28   12.80
   9   0  -8  185.28   11.40
  -9   0   8  198.18   14.50
   0   1   8 2537.55   58.99
   0   1  -8 2696.73   61.29
   0  -1   8 2601.84   58.49
   1  -1   8 2630.94   59.89
   1   1  -8 2519.95   60.59
  -1   1   8 2615.64   60.29
   1  -1   8 2554.74   54.69
   1   1   8 2671.13   59.19
  -1  -1   8 2605.54   61.79
  -1   1  -8 2683.13   62.09
  -2   1   8 1943.01   51.39
   2   1  -8 1993.50   49.99
   2  -1   8 1972.50   50.69
   2  -1  -8 1844.62   47.80
  -2   1  -8 1871.61   45.20
  -2  -1   8 1911.11   49.40
   3  -1   8   98.09   15.90
   3   1  -8   82.89   15.90
  -3   1   8   85.89   13.40
   3   1   8   91.09   13.00
   3  -1  -8   78.29   13.30
  -3  -1   8  102.19   15.80
  -4   1   8  288.57   22.20
   4  -1   8  291.67   23.80
   4   1   8  311.07   22.50
   4  -1  -8  297.37   23.60
  -4  -1   8  338.87   26.30
  -5   1   8 1282.27   45.00
   5  -1   8 1342.57   47.90
   5  -1  -8 1159.38   43.00
  -5  -1   8 1180.38   43.90
  -6  -1  -8  117.69   18.90
  -6   1   8  131.09   18.30
  -6  -1  -8  123.59   14.50
  -6  -1  -8  135.39   15.50
  -6   1   8  131.29   15.50
  -6   1  -8  102.19   14.30
  -6  -1   8   91.09   13.40
  -6   1  -8   92.99   12.60
  -6  -1   8   75.09   11.10
   6  -1  -8   83.29    9.70
  -7  -1  -8   21.20    9.60
  -7   1   8   15.10   10.30
  -7   1   8    8.70   16.00
  -7  -1  -8   28.70   10.90
  -7  -1   8   30.50   12.20
  -7   1  -8   27.50   15.30
  -7   1  -8   26.20    8.70
   7  -1  -8   28.00    8.50
  -7  -1   8   32.40   11.70
  -8   1   8   22.70   15.20
  -8   1   8   52.09   12.20
  -8  -1  -8   37.60    9.70
   8   1  -8   31.40    7.90
  -8   1  -8    7.90   15.40
  -8  -1   8   30.50   11.40
   8  -1  -8   17.80    7.70
  -9   1   8   75.39   10.20
  -9  -1  -8   77.29   11.20
   9   1  -8   81.89   11.10
   9  -1  -8   64.99    9.30
  -9  -1   8   67.39   10.60
  -9   1  -8   43.80   13.70
   0   2  -8  179.68   17.10
   0  -2   8  196.28   13.40
   0   2   8  217.98   16.00
  -1   2   8  551.04   24.00
   1  -2   8  541.25   23.30
   1   2  -8  573.24   23.00
  -1   2  -8  573.84   21.80
  -1  -2   8  593.94   25.00
  -1  -2   8  547.95   15.80
   1   2   8  519.05   21.20
   2   2  -8 1984.20   51.49
  -2   2   8 2038.70   51.89
   2  -2   8 2015.90   52.49
  -2   2  -8 2148.98   52.99
  -2  -2   8 2208.88   56.59
   2  -2  -8 2191.98   56.79
  -3   2   8  306.87   21.80
   3  -2   8  349.47   23.40
   3   2  -8  293.07   21.40
   3   2   8  191.08   16.00
   3  -2  -8  194.78   20.00
  -3  -2   8  234.78   21.70
  -4   2   8  713.43   31.20
   4  -2   8  712.13   34.50
   4  -2  -8  661.53   31.70
  -5   2   8   16.30   12.50
  -5  -2  -8   23.40   10.10
   5  -2   8   21.00   16.50
  -5  -2  -8    8.20    7.80
   5  -2  -8  -13.00   13.00
   5  -2  -8   18.20    6.40
  -5  -2   8   17.10   11.20
  -5   2  -8   17.50   11.10
  -5  -2   8   15.20    9.00
  -6  -2  -8   72.09   10.90
  -6   2   8   47.00   14.20
  -6   2   8   39.10    9.30
  -6  -2  -8   54.89   10.00
  -6  -2   8   42.60   10.40
   6  -2  -8   80.69   12.40
  -6   2  -8   59.69   13.70
  -6  -2   8   46.90   12.00
  -7  -2  -8    0.00   10.60
  -7   2   8   19.30   10.70
  -7  -2  -8   14.80   10.30
  -7   2   8    6.10   13.70
  -7  -2   8    1.70   11.00
   7  -2  -8   16.40    8.60
  -7   2  -8    7.80   16.10
  -7  -2   8   10.30   12.30
  -8  -2  -8   74.59   11.10
  -8   2   8   80.29   16.40
  -8  -2  -8   91.29   11.30
  -8   2   8   87.59   11.60
  -8  -2   8   73.99   12.30
  -8  -2   8  105.89   13.30
   8  -2  -8   94.19   12.20
  -8   2  -8  101.39   16.10
   9   2  -8   71.29    9.00
  -9   2   8   63.69   12.50
  -9  -2  -8   78.39   11.40
   9  -2  -8   81.49    9.80
  -9  -2   8   81.79   12.60
  -9   2  -8   75.89   14.00
   0   3  -8 1773.32   48.00
   0   3   8 1723.43   46.90
   0  -3   8 1793.42   43.50
  -1   3   8 1063.69   33.90
   1  -3   8 1110.69   33.80
   1   3  -8 1024.00   35.20
  -1   3  -8  992.30   32.90
   2   3  -8  185.08   19.00
  -2   3   8  193.98   18.80
   2  -3   8  184.98   19.60
  -2   3  -8  183.68   17.10
   2  -3  -8  160.18   21.20
   3   3  -8  308.87   23.70
   3  -3   8  262.67   26.60
  -3   3   8  278.27   23.70
   3  -3  -8  213.78   23.20
  -4   3   8   53.09   15.50
   4  -3   8   71.39   17.30
   4  -3  -8   37.90   15.20
  -5  -3  -8  643.54   19.60
  -5   3   8  695.03   26.50
  -5  -3  -8  683.13   22.90
   5   3  -8  656.73   19.20
   5  -3  -8  659.33   19.90
  -5  -3   8  662.83   20.30
  -5   3  -8  712.83   25.10
  -5  -3   8  701.83   23.40
   5  -3  -8  665.73   37.60
  -6  -3  -8  115.89   15.00
   6   3  -8   84.29   11.40
  -6   3   8  120.89   16.30
  -6  -3  -8  119.09   16.80
  -6   3  -8   77.99   13.60
   6  -3  -8   92.69   11.00
  -6  -3   8  101.69   15.10
  -6  -3   8  104.19   14.10
  -7   3   8   38.10   16.50
  -7  -3  -8   13.50   11.80
  -7  -3  -8   17.00   10.50
  -7  -3   8   -3.20   11.00
  -7  -3   8    1.70   12.80
   7  -3  -8   18.30    8.90
  -7   3  -8   10.20   16.80
  -8  -3  -8   15.80    9.30
  -8  -3  -8   12.40   10.80
  -8   3   8    4.70   15.50
  -8  -3   8   12.40   10.90
   8  -3  -8   17.10    7.10
  -8   3  -8   14.80   14.90
  -8  -3   8   11.20   11.30
  -9  -3  -8   69.69    8.30
   9   3  -8   58.39    8.60
  -9   3   8   41.50   11.80
  -9   3  -8   63.29   13.20
   9  -3  -8   58.69    7.10
  -9  -3   8   52.89    9.80
  -9  -3   8   66.69    9.50
   0   4  -8  418.36   25.10
   0   4   8  379.46   22.70
   1  -4   8  493.25   25.00
   1   4  -8  498.15   26.50
  -1   4   8  475.75   24.10
  -1   4  -8  491.75   25.20
  -2   4   8  384.26   25.10
   2   4  -8  360.26   25.00
   2  -4   8  392.26   26.20
   2  -4  -8  433.46   27.70
  -2   4  -8  421.56   24.20
   3   4  -8  304.37   26.40
  -3   4   8  295.77   23.90
   3  -4   8  297.77   28.90
   3  -4  -8  255.17   25.40
  -4  -4  -8  292.57   16.60
   4  -4   8  289.67   29.80
  -4  -4  -8  281.97   13.40
  -4   4  -8  251.77   28.90
   4  -4  -8  279.97   12.30
   4  -4  -8  259.97   29.50
  -4  -4   8  261.07   16.50
  -5  -4  -8   61.09    9.90
  -5  -4  -8   36.80   10.00
  -5   4   8   28.70   13.00
   5  -4  -8   41.60    8.20
  -5  -4   8   55.89   12.50
  -5   4  -8   43.90   12.90
  -6  -4  -8   58.49   11.00
  -6  -4  -8   54.49   12.80
   6   4  -8   48.20    8.20
  -6   4   8   37.80   16.60
   6  -4  -8   54.69    9.30
  -6  -4   8   41.20   10.20
  -6   4  -8   62.29   15.10
  -6  -4   8   45.20   14.60
  -7  -4  -8  113.49   17.90
  -7  -4  -8   82.49   10.80
  -7   4   8  128.99   18.90
  -7  -4   8  103.59   14.80
   7  -4  -8  107.09   11.90
  -7   4  -8  103.29   16.00
  -7  -4   8  129.99   15.30
  -8  -4  -8   28.50   10.70
  -8  -4  -8   44.10    9.70
  -8   4   8   30.60   16.50
  -8  -4   8   42.80   12.00
   8  -4  -8   34.70    6.20
  -8   4  -8   52.29   13.90
  -8  -4   8   40.30    9.10
   0   5   8  133.09   22.60
   0   5  -8  164.68   24.20
   1   5  -8   71.29   20.30
  -1   5   8   57.79   15.50
   1   5   8  107.69   18.70
  -1   5  -8   82.79   17.90
   2  -5   8   54.79   14.30
   2   5  -8   69.39   19.80
  -2   5   8   92.59   17.10
  -2   5  -8   94.99   18.00
   3  -5   8   36.30   14.90
  -3   5   8   34.50   14.90
  -3  -5  -8   87.09    9.60
   3   5  -8   69.29   22.40
  -3  -5  -8   56.29   10.20
   3  -5  -8   71.59    8.80
   3   5   8   80.49   18.80
  -3   5  -8  116.59   15.70
   3  -5  -8   40.20   17.70
  -3  -5   8   52.19   11.00
  -4  -5  -8   51.09    9.20
  -4  -5  -8   57.59   11.00
   4   5  -8   40.50   14.00
  -4   5   8   49.70   13.30
  -4  -5   8   40.20   11.50
   4  -5  -8   34.30    7.40
  -5  -5  -8  782.02   26.00
  -5   5   8  790.92   32.20
  -5  -5  -8  811.12   23.70
  -5   5  -8  803.52   29.50
  -5  -5   8  803.22   28.00
   5  -5  -8  777.02   22.50
   6   5  -8  267.77   14.90
  -6  -5  -8  284.47   16.40
  -6  -5  -8  253.37   20.40
  -6   5   8  250.17   25.20
   6  -5  -8  219.18   13.60
  -6  -5   8  204.28   21.00
  -6   5  -8  222.68   23.80
   7   5  -8   76.49    8.60
  -7   5   8   72.49   18.40
  -7  -5  -8   59.99   12.20
  -7  -5  -8   87.09   10.50
  -7   5  -8   67.99   14.20
   7  -5  -8   64.79    9.80
  -7  -5   8   55.49   12.80
  -8   5   8   42.70   12.30
  -8  -5  -8   54.29    8.30
  -8  -5  -8   57.59    9.60
  -8  -5   8   55.79   10.40
   8  -5  -8   67.39    8.60
  -8   5  -8   74.09   13.00
   0   6   8  413.06   31.00
   0   6  -8  372.06   32.10
   0   6  -8  437.36   21.00
   0  -6  -8  440.26   15.00
   0   6   8  414.66   30.70
   1   6  -8  171.58   17.70
  -1   6   8  174.38   25.50
   1   6  -8  199.18   33.00
  -1   6   8  106.79   18.60
  -1  -6  -8  137.69   12.20
   1  -6  -8  141.29    9.10
  -1   6  -8  182.78   29.80
  -1  -6   8  114.79   10.10
   1   6   8  191.58   27.80
   1   6   8  135.59   21.00
  -1   6  -8  166.08   17.70
   1  -6  -8  153.38   11.00
   2   6  -8   55.39   22.60
  -2  -6  -8   55.59    8.60
   2   6  -8   75.69   13.80
  -2   6   8   89.59   23.10
   2  -6  -8   50.79    7.10
  -2   6  -8   64.59   19.80
   2  -6  -8   32.50    8.10
   2   6   8   73.49   21.00
  -2   6  -8   35.90   10.30
   3   6  -8  402.36   36.20
   3  -6  -8  414.56   16.50
  -3   6  -8  446.86   21.70
   3   6   8  416.76   35.00
  -4  -6  -8  140.19   17.00
   4   6  -8  116.09   24.70
  -4   6   8  156.98   22.30
  -4  -6   8  121.49   18.40
   4  -6  -8  123.19   11.20
  -5  -6  -8   99.59   16.40
  -5   6   8   96.59   15.60
  -5  -6   8   95.59   13.30
   5  -6  -8  127.19   12.80
  -6  -6  -8  119.99   17.50
   6   6  -8  144.39   13.70
  -6   6   8   92.79   16.00
   6  -6  -8  106.99   11.20
  -6  -6   8   78.79   13.00
  -6   6  -8  102.99   14.40
  -7  -6  -8   38.70   11.00
   7   6  -8   65.89    9.70
  -7   6   8   44.50   14.20
   7  -6  -8   43.20    6.50
  -7   6  -8   45.60   12.40
  -7  -6   8   31.90   10.20
   0   7  -8  352.76   19.40
   0  -7   8  333.17   14.40
   0   7   8  402.96   36.50
   0   7  -8  414.06   36.90
   0  -7  -8  367.56   15.90
  -1   7   8   37.30   21.00
  -1  -7  -8    5.00    9.10
   1   7  -8    2.40    9.90
   1   7  -8   20.90   21.80
  -1  -7   8   12.20    6.30
   1  -7  -8   16.30    8.50
   1   7   8   59.59   24.60
  -1   7  -8   12.60   20.00
  -1   7  -8   20.50   10.50
  -2  -7  -8  104.09   13.20
   2   7  -8  179.18   37.20
  -2   7   8  126.69   27.10
   2   7  -8  125.49   19.80
  -2   7  -8   81.99   16.90
   2  -7  -8   87.99   13.70
   2   7   8   85.99   25.20
   3   7  -8  379.36   29.30
   3   7  -8  459.05   39.20
   3  -7  -8  393.66   16.70
   3   7   8  400.46   36.70
  -3   7  -8  400.76   22.00
   4   7  -8   23.50   16.90
   4  -7  -8   79.99   11.90
   5   7  -8  158.38   25.40
   5  -7  -8  205.08   13.30
   6   7  -8  109.79   10.20
  -6  -7  -8   72.89   11.60
   6  -7  -8  106.59    9.70
  -6  -7   8   73.09   10.60
   7  -7  -8   23.40    6.40
   0   8  -8   -4.80   14.70
   0  -8  -8   -1.30    9.10
   0  -8   8   -3.90    9.00
  -1  -8  -8  148.99   13.20
   1   8  -8  125.59   19.80
  -1   8  -8  119.29   21.40
   1  -8  -8  135.59   12.80
   2   8  -8  217.38   19.70
  -2  -8  -8  249.08   14.80
   2   8  -8  203.48   27.50
   2  -8  -8  211.98   14.00
  -2   8  -8  178.78   20.30
   3   8  -8   72.09   19.90
   3  -8  -8   85.79   12.00
  -3   8  -8   78.69   13.80
   4   8  -8   18.70   16.20
   4  -8  -8   36.60    7.80
   5   8  -8   11.10    7.50
   5  -8  -8    4.90    6.10
   6  -8  -8    1.90    6.20
   0   9  -8   22.30   16.70
   0   9  -8   13.10   13.40
   0  -9  -8   41.20    7.80
  -1  -9  -8   17.30    6.90
   1   9  -8    8.20   12.20
   1   9  -8   -3.90   16.90
  -1   9  -8   27.60   18.20
   1  -9  -8    8.00    7.70
  -1   9  -8   -0.80   12.20
   2   9  -8    6.50   16.10
   2   9  -8   12.60   10.20
   2  -9  -8   -3.20    7.40
  -2   9  -8    6.60   12.70
   3   9  -8   24.50   15.20
  -3   9   8   67.29   14.20
   3  -9  -8   13.50    6.60
  -3   9  -8   18.10   11.60
   4   9  -8    3.50   12.60
   4   9  -8   31.70    6.90
   4  -9  -8    7.70    5.20
   0  10   8    1.20    8.80
   0  10  -8   -1.70    9.30
   0  10  -8   -7.60   12.10
   1  10  -8   50.79   13.10
  -1  10   8   65.09   13.50
   1  10  -8   50.79    9.60
   1 -10  -8   51.69    7.30
   1  10   8   66.59   11.40
  -1  10  -8   56.29   11.20
   2  10  -8   17.80   11.80
   2 -10  -8   52.89    7.60
  -2  10  -8   40.00   11.70
   0   0  -9   -9.40   12.00
   0   0   9   26.40    8.50
   1   0  -9  997.70   30.10
  -1   0  -9  954.90   29.70
  -1   0   9  962.20   29.30
   1   0   9  933.61   24.30
   2   0  -9  242.48   16.30
  -2   0  -9  201.58   13.90
   2   0   9  230.88   17.90
  -2   0   9  227.78   17.90
   2   0   9  196.08    8.40
   3   0   9  538.55   25.60
  -3   0   9  508.95   24.60
   3   0  -9  495.25   21.40
  -4   0   9   27.10   13.10
   4   0   9   24.50   12.40
   4   0  -9    8.60   10.90
   5   0   9   41.80   16.40
  -5   0   9   30.70   14.70
  -6   0  -9  308.07   21.30
  -6   0  -9  313.67   14.60
  -6   0   9  316.87   16.60
  -7   0  -9  570.14   20.30
   7   0  -9  592.54   19.60
  -7   0  -9  570.54   27.50
  -7   0   9  583.14   23.10
   8   0  -9  166.18   13.90
  -8   0   9  165.78   17.80
  -8   0  -9  136.29   24.30
  -8   0  -9  130.79   14.70
  -9   0   9   36.80   10.30
  -9   0  -9   51.09    8.10
   9   0  -9   57.39    9.20
   0   1  -9 4918.51  105.39
   0  -1   9 4843.22  102.49
   0   1   9 4688.43  102.99
  -1   1   9 2617.34   61.09
   1  -1   9 2545.15   55.89
   1   1  -9 2664.53   63.29
   1  -1   9 2612.54   60.79
   1   1   9 2533.85   57.99
  -1  -1   9 2551.94   60.99
  -1   1  -9 2708.73   60.89
   2   1  -9 1479.15   40.80
   2  -1   9 1417.96   40.80
  -2   1   9 1445.26   41.30
  -2   1  -9 1272.67   34.30
   2   1   9 1313.97   32.40
  -2  -1   9 1321.37   39.10
   3  -1   9  433.56   25.10
   3   1  -9  444.86   22.20
  -3   1   9  453.55   23.60
   3  -1  -9  445.06   23.20
  -3  -1   9  468.65   27.50
   3   1   9  449.46   23.80
  -4   1   9   71.69   15.50
   4  -1   9   46.90   14.40
   4  -1  -9  136.59   18.60
  -4  -1   9   83.59   16.00
   4   1   9  118.99   19.70
  -5   1   9   53.49   15.90
   5  -1   9   29.30   15.30
   5  -1  -9   45.30   14.80
  -5  -1   9   39.00   14.90
  -6   1   9  325.17   23.70
  -6  -1  -9  301.67   14.90
  -6   1   9  321.37   16.30
  -6  -1  -9  327.37   20.90
  -6  -1  -9  338.07   17.10
  -6   1  -9  293.17   14.50
   6  -1  -9  267.57   13.00
  -6  -1   9  271.47   17.60
  -6   1  -9  290.87   21.80
  -6  -1   9  311.97   18.00
  -7  -1  -9  167.38   16.30
  -7   1   9  178.98   16.90
  -7  -1  -9  173.48   15.10
  -7   1   9  187.68   22.60
  -7   1  -9  177.18   21.00
   7  -1  -9  213.98   14.10
  -7  -1   9  217.48   20.20
  -7   1  -9  218.88   17.20
  -7  -1   9  215.28   18.70
   8   1  -9   95.49   12.40
  -8  -1  -9  111.69   15.80
  -8   1   9  117.59   12.90
  -8   1   9   79.19   15.80
  -8  -1   9  102.69   12.50
   8  -1  -9   96.69   11.70
  -8   1  -9   91.89   16.10
   9   1  -9   93.79   10.60
  -9  -1  -9  117.49   13.30
  -9   1   9  115.49   14.40
   9  -1  -9  100.39    9.50
  -9   1  -9   91.19   14.00
  -9  -1   9  104.29   14.90
   0  -2   9   16.20    9.30
   0   2  -9   20.60   12.40
   0   2   9   21.30   11.10
   0  -2   9   11.00    7.70
   1  -2   9  336.97   18.50
  -1   2   9  325.57   19.50
   1   2  -9  342.27   20.30
  -1  -2   9  324.47   21.10
   1   2   9  289.67   18.00
  -1   2  -9  312.27   18.00
  -1  -2   9  331.17   12.80
   2   2  -9  109.19   17.30
  -2   2   9   65.49   13.50
   2  -2   9   56.19   12.50
  -2  -2   9   74.59   14.30
   2  -2  -9   88.69   14.40
  -2   2  -9  116.79   15.00
  -3   2   9  537.35   28.50
   3  -2   9  491.55   27.30
   3   2  -9  551.34   26.00
  -3  -2   9  620.04   29.40
   3  -2  -9  611.84   30.20
   3   2   9  610.54   23.80
  -4   2   9  169.28   21.70
   4  -2   9  207.68   27.10
   4   2   9  153.78   18.60
   4  -2  -9  148.89   25.50
  -4  -2   9  150.78   20.90
  -5   2   9   10.50   12.40
  -5  -2  -9   26.10    9.10
  -5  -2  -9   22.70    8.30
   5  -2   9    7.20   17.60
  -5  -2   9   20.00    9.50
   5  -2  -9   19.30   14.60
  -5  -2   9   33.00   11.80
  -5   2  -9   31.60   11.90
   5  -2  -9   27.40    7.30
  -6   2   9  451.65   26.50
  -6  -2  -9  495.25   21.00
   6   2  -9  461.35   16.20
  -6   2   9  476.55   19.50
  -6  -2  -9  468.45   18.60
  -6  -2   9  464.55   19.00
   6  -2  -9  479.85   17.40
  -6  -2   9  487.85   22.00
  -6   2  -9  461.55   25.40
  -7   2   9   78.69   10.80
  -7  -2  -9   76.79   11.70
  -7  -2  -9   73.49   10.70
  -7   2   9   51.59   16.10
  -7  -2   9   57.89   11.50
   7  -2  -9   76.29   13.20
  -7   2  -9   45.30   14.80
  -7  -2   9   67.89   13.20
  -8   2   9  120.79   16.70
  -8  -2  -9  120.99   16.90
  -8  -2  -9  114.29   13.50
  -8   2   9   96.89   17.60
  -8   2  -9  106.89   16.80
   8  -2  -9  116.59   11.90
  -8  -2   9  121.09   13.70
  -8  -2   9   85.29   12.30
  -9   2   9   24.00   11.60
  -9  -2  -9   15.20    7.50
   9   2  -9   16.90    6.00
  -9   2  -9    1.60   11.20
  -9  -2   9   22.00    8.80
   9  -2  -9    8.80    5.80
   0   3   9  439.76   22.50
   0  -3   9  441.56   17.30
   0   3  -9  458.85   23.10
   1   3  -9 2359.56   61.39
  -1   3   9 2434.96   60.49
   1   3   9 2287.67   58.69
  -1   3  -9 2440.36   60.19
   2  -3   9  541.15   26.80
   2   3  -9  542.35   26.20
  -2   3   9  587.44   26.30
  -2   3  -9  652.63   26.60
   2  -3  -9  675.03   31.30
   3   3  -9  704.63   31.40
   3  -3   9  697.33   35.20
  -3   3   9  671.63   29.60
   3  -3  -9  640.74   32.00
  -4   3   9  510.05   29.90
   4  -3   9  514.35   32.30
   4  -3  -9  621.94   34.70
  -5   3   9  204.58   20.80
   5   3  -9  198.28   11.30
  -5  -3  -9  188.58   15.50
  -5  -3  -9  212.18   14.20
  -5  -3   9  212.98   18.80
  -5   3  -9  179.48   18.80
  -5  -3   9  225.98   14.40
   5  -3  -9  215.18   11.40
   5  -3  -9  176.18   26.10
  -6  -3  -9   56.49   11.40
   6   3  -9   58.59    8.70
  -6   3   9   66.59   10.90
  -6   3   9   43.30   17.20
  -6  -3  -9   39.50    8.90
  -6  -3   9   40.70    9.50
  -6  -3   9   49.80   13.20
   6  -3  -9   61.59    9.10
  -6   3  -9   49.60   15.20
  -7  -3  -9  134.09   16.10
  -7   3   9  120.89   18.20
  -7  -3  -9  125.19   19.60
   7  -3  -9  119.29   12.70
  -7   3  -9  106.79   17.10
  -7  -3   9  147.89   17.20
  -7  -3   9  145.89   20.20
  -8   3   9   17.10   16.80
  -8  -3  -9   11.80    9.70
  -8  -3  -9   29.40   10.00
  -8  -3   9   39.70   10.40
   8  -3  -9   16.00    7.40
  -8  -3   9   -4.70   11.70
  -8   3  -9   11.10   14.20
  -9   3   9   20.90   13.70
  -9  -3  -9   31.50    7.50
   9   3  -9   26.30    5.40
  -9  -3   9   25.80    6.40
   9  -3  -9   23.80    4.70
  -9   3  -9   31.60   11.50
   0   4  -9  601.54   29.60
   0   4   9  634.44   28.70
   1   4  -9  212.08   22.70
  -1   4   9  216.18   21.80
   1  -4   9  187.98   19.50
   1   4   9  199.48   19.20
  -1   4  -9  201.88   19.20
   2   4  -9   78.59   18.80
  -2   4   9   77.99   15.00
   2  -4   9   49.70   15.40
  -2   4  -9   50.89   14.50
  -3   4   9  278.97   25.70
   3  -4   9  278.37   25.10
   3   4  -9  264.47   26.60
   3  -4  -9  234.28   24.20
   4  -4   9  384.26   36.20
  -4  -4  -9  387.96   16.10
   4   4  -9  398.26   25.70
  -4  -4  -9  392.66   15.60
  -4   4  -9  408.66   20.90
  -4  -4   9  388.46   18.90
   4  -4  -9  360.46   29.30
   4  -4  -9  378.16   15.10
  -5  -4  -9  293.17   15.90
  -5  -4  -9  269.77   18.70
  -5   4   9  278.67   25.00
   5  -4  -9  264.87   14.20
  -5   4  -9  268.97   21.90
  -5  -4   9  265.47   20.20
  -6  -4  -9   57.99   10.20
  -6   4   9   62.39   16.40
  -6  -4  -9   68.89   11.90
   6   4  -9   65.29    9.00
   6  -4  -9   60.09    9.30
  -6  -4   9   51.29   13.80
  -6  -4   9   46.20   10.30
  -6   4  -9   52.19   15.00
   7   4  -9   90.59   11.60
  -7  -4  -9   81.59   12.30
  -7  -4  -9   78.89   11.60
  -7   4   9   95.09   19.20
  -7  -4   9   87.59   15.00
  -7  -4   9   76.49   10.80
  -7   4  -9   71.29   15.70
   7  -4  -9   84.49   11.90
  -8   4   9    5.20   15.60
  -8  -4  -9   -0.70   11.20
  -8  -4  -9   13.70    8.80
  -8  -4   9    0.90   10.60
   8  -4  -9    2.50    5.80
  -8  -4   9    4.90    8.50
  -8   4  -9   -1.50   12.80
   0   5  -9   21.00   17.30
   0   5   9    0.00   12.80
   1   5  -9  751.02   39.10
  -1   5   9  719.53   34.10
  -1   5  -9  711.93   35.10
   1   5   9  705.33   33.60
   2   5  -9   72.49   19.20
   2  -5   9   33.70   13.00
  -2   5   9   61.59   15.20
  -2   5  -9   63.79   18.50
   2   5   9   49.90   15.10
  -3   5   9  222.68   24.80
   3   5  -9  227.88   27.60
  -3  -5  -9  239.68   12.10
   3  -5   9  194.48   26.50
  -3  -5  -9  225.98   14.50
  -3   5  -9  220.18   15.30
   3  -5  -9  179.78   10.50
  -3  -5   9  198.48   16.40
   3  -5  -9  189.78    8.80
   3   5   9  165.08   25.30
  -4   5   9  273.77   25.30
  -4  -5  -9  233.58   15.90
  -4  -5  -9  262.07   13.80
   4   5  -9  260.07   23.60
   4  -5  -9  257.27   13.90
  -4  -5   9  271.97   18.90
  -5  -5  -9  384.86   17.10
  -5   5   9  410.06   26.30
  -5  -5  -9  372.66   19.60
   5  -5  -9  372.36   15.90
  -5   5  -9  417.16   24.50
  -5  -5   9  372.26   22.80
  -6  -5  -9   47.00    9.80
  -6   5   9   57.69   16.80
   6   5  -9   33.60    8.40
  -6  -5  -9   44.60   12.20
  -6  -5   9   59.19   13.70
   6  -5  -9   41.10    7.80
  -6   5  -9   45.60   14.50
   7   5  -9   29.80    7.90
  -7  -5  -9   38.10    9.60
  -7  -5  -9   29.10   10.70
  -7   5   9   25.20   16.50
   7  -5  -9   12.30    6.30
  -7  -5   9   19.20   12.00
  -7   5  -9   24.30   14.20
  -8   5   9  -10.40   12.90
  -8  -5  -9   -4.30    8.70
  -8  -5  -9    6.90    7.70
  -8   5  -9    7.10   11.90
   8  -5  -9   -2.30    5.00
  -8  -5   9   -9.20    8.70
   0  -6  -9   27.80    6.50
   0  -6  -9   35.70    8.00
   0   6  -9   23.10   10.60
   0   6   9   19.70   14.30
   0   6  -9   27.00   21.10
  -1   6   9  224.08   26.70
   1   6  -9  189.48   16.20
   1   6  -9  186.58   27.50
  -1  -6  -9  189.38   12.80
  -1   6  -9  189.68   25.90
   1  -6  -9  202.58   13.50
  -1   6  -9  214.48   15.10
   1  -6  -9  201.58   11.20
   1   6   9  270.07   41.40
   1   6   9  236.58   27.40
  -2   6   9   70.59   21.00
  -2  -6  -9   52.79    8.70
   2   6  -9   66.29   23.40
   2   6  -9   64.09   12.70
   2   6   9   72.09   23.50
   2  -6  -9   46.10    6.50
  -2   6  -9   59.09   12.50
  -2   6  -9   56.69   19.10
   2  -6  -9   43.30    7.70
   3   6  -9   81.69   22.90
   3   6  -9   64.09   15.60
  -3   6  -9   84.29   15.60
   3  -6  -9   25.30    8.40
   3   6   9   36.60   20.60
   4   6  -9  130.29   24.50
  -4   6   9  127.59   23.00
  -4  -6  -9  123.39   15.10
   4  -6  -9  165.98   13.00
  -4  -6   9  175.28   17.80
  -5   6   9  256.97   25.50
  -5  -6  -9  259.27   19.50
   5  -6  -9  303.87   14.90
  -5  -6   9  304.17   19.80
   6   6  -9   44.90    8.80
  -6   6   9   19.30   15.50
  -6  -6  -9   -0.30   14.30
  -6  -6  -9   26.80   11.30
   6  -6  -9   32.00    7.40
  -6   6  -9   45.40   15.20
  -6  -6   9   28.80   11.60
  -7   6   9   77.09   14.40
   7   6  -9   96.49    9.70
  -7  -6  -9   84.59   11.50
   7  -6  -9   94.39    9.30
  -7   6  -9   80.49   12.30
  -7  -6   9   62.79   10.90
   0   7   9  322.37   34.00
   0   7  -9  310.47   22.20
   0   7  -9  271.87   33.70
   0  -7  -9  301.97   13.70
   1   7  -9  223.98   20.50
   1   7  -9  241.58   38.10
  -1   7   9  216.68   35.50
  -1  -7  -9  239.78   14.40
  -1  -7   9  263.17   12.50
   1  -7  -9  282.07   13.80
  -1   7  -9  302.17   36.70
   1   7   9  226.88   33.00
  -1   7  -9  247.58   21.20
   2   7  -9  328.87   35.10
   2   7  -9  319.07   21.20
  -2   7   9  326.67   35.60
  -2  -7  -9  319.47   15.60
   2   7   9  317.87   36.90
  -2   7  -9  286.57   22.40
   2  -7  -9  314.77   15.70
   3   7  -9  251.97   35.30
   3   7  -9  196.68   29.50
   3  -7  -9  251.67   14.70
   3   7   9  265.97   33.50
  -3   7  -9  230.38   19.60
   4   7  -9  185.88   27.90
   4  -7  -9  239.58   13.90
   5   7  -9  206.78   26.80
   5  -7  -9  295.87   14.10
  -6  -7  -9   35.30   10.10
   6   7  -9   52.19    8.20
  -6   7   9   26.20   16.20
   6  -7  -9   42.30    6.60
  -6  -7   9   46.50    9.40
   0  -8  -9   25.70    8.60
   0   8  -9    1.50   13.00
   0   8  -9   45.10   18.60
  -1  -8  -9   50.69    8.40
   1   8  -9   71.09   20.00
   1   8  -9   49.60   13.70
   1  -8  -9   66.89   12.00
  -1   8  -9   74.39   17.60
  -1   8  -9   49.10   14.00
  -2  -8  -9    4.60    8.40
   2   8  -9  -12.40   19.60
   2   8  -9    1.90   12.30
  -2   8  -9   -6.40   12.50
   2  -8  -9    3.00    7.50
   3   8  -9  133.49   28.00
   3  -8  -9  187.08   12.90
  -3   8  -9  188.78   21.00
   4   8  -9   52.09   16.80
   4  -8  -9   61.09    8.00
   5   8  -9  126.69   11.90
   5   8  -9   57.39   15.60
   5  -8  -9  121.69    9.80
   0   9  -9  -24.10   12.30
   0  -9  -9   -1.80    6.70
   0   9  -9   -1.00   16.50
   1   9  -9   21.80   16.40
  -1  -9  -9   46.10    7.50
   1   9  -9   31.50   12.80
   1  -9  -9   54.39    8.40
  -1   9  -9   23.80   13.40
   2   9  -9   59.69   17.10
   2   9  -9   35.30   11.20
   2  -9  -9   65.69    8.50
  -2   9  -9   28.70   12.80
  -3   9   9  116.89   14.40
   3   9  -9   58.09   16.10
  -3   9  -9   89.19   13.90
   3  -9  -9   99.19    9.90
   4   9  -9   18.50    6.20
   4   9  -9    9.00   11.70
   4  -9  -9   15.70    5.10
   0  10   9   10.10    9.00
   0  10  -9   10.80    9.90
   0  10  -9  -26.00   14.80
  -1  10   9    6.70    8.10
   1  10  -9   -9.30   11.60
   1  10  -9   -7.30    9.60
  -1  10  -9   -2.90    9.80
   1  10   9    3.30    7.70
   1 -10  -9    1.00    4.70
   0   0 -10 1542.05   41.20
   0   0  10 1505.55   38.80
  -1   0  10  942.91   30.90
   1   0 -10  952.40   30.50
   1   0  10  898.01   24.50
  -1   0 -10  938.91   29.10
  -2   0  10    6.30   10.80
   2   0  10  -11.00    4.50
   2   0  10    8.80   10.80
  -2   0 -10   14.30    9.60
   2   0 -10   13.30   11.60
   3   0  10  302.47   21.50
  -3   0  10  296.67   23.30
   3   0 -10  304.17   18.70
  -4   0  10  170.68   22.70
   4   0  10  164.08   23.60
  -5   0  10  113.29   20.10
   5   0  10   86.49   16.40
  -6   0  10   -4.80   10.60
  -6   0 -10   12.60    8.10
  -6   0 -10    9.90   13.30
   7   0 -10  118.89   12.10
  -7   0 -10   99.59   15.30
  -7   0 -10  126.49   13.50
  -7   0  10  131.79   17.40
  -8   0  10   44.80   11.80
   8   0 -10   47.20    8.60
  -8   0 -10   51.79    8.60
  -8   0 -10   48.60   15.50
  -9   0  10   67.99   10.30
   9   0 -10   67.29    9.00
  -9   0 -10   62.69    8.60
   0  -1  10   -2.30    8.70
   0   1 -10   -5.10   12.90
   0   1  10   17.00    9.20
   1  -1  10 1742.33   40.90
   1  -1  10 1849.21   46.50
   1   1 -10 1838.02   48.00
  -1   1  10 1857.61   46.70
  -1  -1  10 1798.82   47.20
  -1   1 -10 1844.22   46.80
   1   1  10 1851.91   44.10
   1  -1 -10 1876.81   48.60
   2   1 -10  390.66   22.10
   2  -1  10  392.16   22.20
  -2   1  10  362.16   22.40
  -2  -1  10  382.46   22.40
   2   1  10  400.26   15.60
  -2   1 -10  357.46   18.50
   3  -1  10 1009.00   35.80
  -3   1  10  989.50   34.40
   3   1 -10  971.30   33.20
   3   1  10  888.01   32.10
  -3  -1  10  930.01   35.40
   3  -1 -10  850.21   33.40
  -4   1  10 1727.83   51.89
   4  -1  10 1645.84   52.59
  -4  -1  10 1804.02   54.19
   4  -1 -10 1643.04   51.39
   4   1  10 1782.52   52.09
   5  -1  10   -4.20   15.70
  -5  -1 -10   14.30   13.00
  -5   1  10   15.30   15.10
  -5   1  10   -1.60   13.60
   5  -1 -10   19.50   10.90
  -5  -1  10   10.20   15.30
  -5  -1  10   16.70   10.00
   5   1  10   27.00   13.80
  -5   1 -10   30.20   11.20
  -6  -1 -10  127.19   13.90
  -6   1  10  106.89   16.50
  -6  -1 -10  125.89   18.20
  -6   1  10  120.19   15.60
  -6  -1 -10  112.49   16.00
  -6   1 -10  121.09   17.90
   6  -1 -10  106.89   10.70
  -6  -1  10  137.19   16.90
  -6  -1  10  125.49   16.20
  -7  -1 -10  231.48   17.50
  -7  -1 -10  236.48   15.20
  -7   1  10  252.07   18.30
  -7  -1 -10  244.58   22.00
  -7   1  10  266.17   24.00
  -7  -1  10  238.68   19.40
   7  -1 -10  257.67   14.60
  -7  -1  10  216.68   21.00
  -7   1 -10  210.88   23.70
   8   1 -10   24.80    8.40
  -8   1  10   35.90   14.90
  -8   1  10   20.90   11.50
  -8  -1 -10   29.40    9.10
  -8   1 -10   11.50   16.00
  -8  -1  10    8.70   11.60
   8  -1 -10   16.80    8.10
  -9  -1 -10  260.67   13.20
   9   1 -10  289.57   11.50
  -9   1  10  267.17   16.30
   9  -1 -10  278.57   11.30
  -9   1 -10  209.28   21.70
  -9  -1  10  249.48   15.70
   0  -2  10  556.14   20.70
   0   2 -10  563.24   24.80
   0  -2  10  561.04   21.70
   0   2  10  562.94   22.80
   1   2 -10  180.58   19.30
   1  -2  10  180.98   18.80
  -1   2  10  227.38   18.90
  -1  -2  10   91.79    9.50
  -1  -2  10   67.79   12.50
   1   2  10   73.59   10.90
  -1   2 -10  103.29   15.20
   2   2 -10  987.50   34.00
  -2   2  10  963.40   33.90
   2  -2  10  979.60   34.20
  -2  -2  10 1020.60   34.80
  -2   2 -10 1001.00   32.90
   2   2  10  959.60   29.70
   3  -2  10  300.37   24.20
   3   2 -10  238.58   22.30
  -3   2  10  257.47   23.20
   3   2  10  198.18   18.10
   3  -2 -10  209.98   20.90
  -3  -2  10  279.37   25.60
   4  -2  10  219.58   25.10
  -4   2  10  134.89   21.90
   4   2  10  201.58   19.30
   4  -2 -10  190.48   21.90
  -4  -2  10  175.98   22.10
  -5  -2 -10  540.35   18.90
  -5   2  10  521.05   18.10
  -5  -2 -10  521.15   18.10
   5  -2  10  562.14   35.90
   5   2 -10  498.75   15.60
   5  -2 -10  525.15   33.30
  -5   2 -10  564.44   22.90
  -5  -2  10  583.04   21.80
  -5  -2  10  560.34   19.10
   5  -2 -10  575.54   17.60
  -6   2  10   68.99   10.50
   6   2 -10   72.59    9.00
  -6   2  10   64.99   15.90
  -6  -2 -10   67.49   11.40
  -6  -2 -10   55.79    9.70
  -6  -2  10   45.00   11.90
  -6   2 -10   48.60   13.70
   6  -2 -10   61.39    9.90
  -6  -2  10   58.69   10.30
  -7  -2 -10  422.76   18.80
  -7   2  10  423.36   27.60
  -7   2  10  404.96   20.30
  -7  -2 -10  414.46   19.80
  -7   2 -10  360.06   26.00
   7  -2 -10  365.66   16.30
  -7  -2  10  357.66   23.30
  -8  -2 -10   35.50   11.40
  -8  -2 -10   40.10    9.70
  -8   2  10   41.10   11.20
  -8   2  10   13.60   17.40
   8   2 -10   50.19    8.40
  -8   2 -10   26.00   15.10
   8  -2 -10   37.00    7.90
  -8  -2  10   55.59   12.20
  -8  -2  10   34.70   11.00
  -9   2  10  113.69   17.60
  -9  -2 -10   97.49   12.20
   9   2 -10  113.59    9.10
  -9  -2  10  108.59   11.90
  -9   2 -10   95.59   16.40
   9  -2 -10  102.39    9.00
   0  -3  10  737.73   25.00
   0   3 -10  800.32   30.10
   0   3  10  747.03   28.60
  -1   3  10   56.49   13.30
   1  -3  10   64.49   12.20
   1   3 -10   55.49   15.30
   1   3  10   81.89   13.00
  -1   3 -10   81.39   16.80
  -2   3  10  342.17   21.90
   2  -3  10  353.76   23.80
   2   3 -10  337.67   25.60
  -2   3 -10  377.26   22.50
   2   3  10  366.26   20.10
   3  -3  10  763.62   34.30
   3   3 -10  732.23   31.50
  -3   3  10  806.12   33.00
   3   3  10  676.43   27.40
   3  -3 -10  698.13   32.30
  -4   3  10  446.26   29.60
   4  -3  10  488.55   32.30
   4  -3 -10  483.45   32.70
  -5  -3 -10  116.59   15.50
  -5   3  10  128.49   13.30
   5   3 -10  142.09   10.80
  -5  -3 -10  123.49   11.50
  -5  -3  10  137.69   18.10
  -5  -3  10  124.09   13.30
   5  -3 -10  123.59   10.50
  -5   3 -10  139.19   20.80
  -6  -3 -10   53.79   11.50
   6   3 -10   34.30    8.20
  -6  -3 -10   35.50   10.40
  -6   3  10   26.90    9.90
  -6   3  10   49.60   16.80
  -6  -3  10   27.70    9.10
  -6   3 -10   33.50   13.70
  -6  -3  10   52.79   13.80
   6  -3 -10   47.50    8.80
  -7  -3 -10  593.44   23.10
  -7  -3 -10  602.34   20.70
  -7   3  10  582.04   27.20
  -7   3  10  562.34   30.90
  -7  -3  10  607.84   22.00
  -7   3 -10  589.54   27.90
   7  -3 -10  602.64   19.50
  -7  -3  10  629.04   27.40
  -8  -3 -10    3.20    9.30
  -8   3  10   17.70   17.30
  -8  -3 -10   15.10   11.10
  -8   3 -10    4.90   14.20
  -8  -3  10    5.00   11.80
   8  -3 -10    1.50    7.10
  -8  -3  10   10.90    9.70
  -9  -3 -10   75.29   10.10
   9   3 -10   74.39    7.30
   9  -3 -10   78.29    7.40
  -9   3 -10   62.69   12.10
   0   4  10    4.80   11.40
   0   4 -10   -5.10   14.10
   1  -4  10 2158.18   58.39
  -1   4  10 2248.58   60.49
   1   4 -10 2268.97   62.59
  -1   4 -10 2188.48   60.59
   1   4  10 2222.78   60.69
  -2   4  10  233.38   21.50
   2  -4  10  247.08   24.60
   2   4 -10  217.18   25.70
   2   4  10  263.07   24.60
  -2   4 -10  269.67   23.20
   3  -4  10   -8.50   13.30
   3   4 -10   14.80   17.70
  -3   4  10   -0.70   13.20
   3  -4 -10    0.40   14.70
   4   4 -10   -5.20   13.20
   4  -4  10    2.20   16.00
  -4  -4 -10   15.50    8.00
  -4  -4 -10   12.80    8.60
   4  -4 -10  -14.80   15.30
  -4   4 -10    8.10   10.60
  -4  -4  10   19.90   11.80
   4  -4 -10   20.10    7.00
   5   4 -10  225.58   13.90
  -5   4  10  227.38   22.40
  -5  -4 -10  243.58   15.30
  -5  -4 -10  251.47   17.40
   5  -4 -10  210.38   12.40
  -5  -4  10  208.88   18.40
  -5   4 -10  227.68   22.80
  -6   4  10   61.79   16.40
   6   4 -10   60.29    9.40
  -6  -4 -10   62.49   11.90
  -6  -4 -10   97.49   14.90
   6  -4 -10   70.09   11.40
  -6  -4  10  102.19   15.70
  -6  -4  10   75.99   14.40
  -6   4 -10   74.99   14.80
   7   4 -10   45.80    8.10
  -7   4  10   44.80   17.20
  -7  -4 -10   27.90   11.70
  -7  -4 -10   31.50   10.60
  -7  -4  10   74.79   13.70
  -7   4 -10   49.70   14.90
  -7  -4  10   63.09   10.50
   7  -4 -10   40.70    7.70
  -8   4  10   14.10   15.50
  -8  -4 -10   12.50    8.60
  -8  -4 -10   16.90    9.90
  -8  -4  10   22.10    8.50
   8  -4 -10   11.30    5.80
  -8  -4  10    9.10   10.10
  -8   4 -10   12.90   13.50
   0   5 -10    7.80   15.70
   0   5  10   -9.90   13.40
  -1   5  10   65.19   15.10
   1   5 -10   68.29   18.90
  -1   5 -10   80.29   19.00
   1   5  10   57.39   14.60
  -2   5  10  141.49   24.90
   2   5 -10  127.19   25.40
   2   5  10  164.68   21.50
   2  -5 -10  141.29   15.30
  -2   5 -10  145.99   23.50
   3   5 -10   13.50   18.30
  -3  -5 -10   24.10    9.10
   3  -5  10   -9.60   15.10
  -3   5  10    0.40   15.30
   3   5 -10   26.40   14.40
   3  -5 -10   12.70    5.40
  -3  -5  10   20.20   10.90
   3   5  10   13.20   16.20
  -3   5 -10   30.00    9.30
   3   5  10    2.80   14.70
   3  -5 -10   10.30    6.20
  -4  -5 -10  166.38   15.40
   4   5 -10  160.98   23.20
  -4  -5 -10  173.08   13.90
   4  -5 -10  182.78   12.00
  -4  -5  10  161.98   18.50
  -5  -5 -10   82.99   13.10
  -5  -5 -10   35.50   10.90
  -5   5  10   70.69   15.20
   5  -5 -10   53.49    8.00
  -5  -5  10   80.49   14.30
  -5   5 -10   51.19   14.00
  -6  -5 -10  100.19   17.30
  -6  -5 -10  109.89   15.80
  -6   5  10  102.49   17.90
   6   5 -10   80.79    9.50
   6  -5 -10   73.29   11.60
  -6   5 -10  101.69   15.50
  -6  -5  10  120.69   15.40
  -7  -5 -10  456.05   19.40
  -7   5  10  461.65   26.90
  -7  -5 -10  461.35   17.30
   7   5 -10  444.16   15.60
  -7  -5  10  421.76   21.80
   7  -5 -10  463.35   15.10
  -7   5 -10  439.86   22.70
  -8   5  10  -19.70   12.90
  -8  -5 -10  -10.10    6.40
  -8  -5 -10   -7.50    8.30
   8  -5 -10    3.70    4.80
  -8   5 -10    0.70   10.50
  -8  -5  10   -2.40    8.40
   0  -6 -10   -0.30    6.60
   0   6 -10    2.30    9.80
   0   6 -10   -5.80   21.30
   0  -6 -10    4.40    6.00
   0   6  10   -0.80   23.20
  -1  -6 -10 1212.98   29.80
   1   6 -10 1179.28   51.19
   1   6 -10 1252.47   35.10
   1  -6 -10 1269.37   30.80
   1   6  10 1221.88   49.20
  -1   6 -10 1229.98   34.80
   1  -6 -10 1273.27   29.40
  -1   6 -10 1232.48   49.99
  -2  -6 -10   81.49   11.20
  -2   6  10   90.59   20.70
   2   6 -10  103.79   15.00
   2   6 -10   79.39   25.40
  -2   6 -10  101.79   16.00
   2  -6 -10   83.49   11.80
   2  -6 -10  100.69    9.60
  -2   6 -10  109.39   22.20
   2   6  10  112.69   24.10
   3   6 -10  252.37   35.10
   3   6 -10  240.48   27.90
   3   6  10  241.58   32.70
   3  -6 -10  200.08   13.50
   3  -6 -10  204.68   10.60
  -3   6 -10  235.18   18.60
   4   6 -10   65.69   17.70
  -4   6  10   72.29   16.10
  -4  -6 -10   49.60   10.20
  -4  -6  10   58.99   12.20
   4  -6 -10   34.10    7.60
   5   6 -10  157.68   29.80
  -5   6  10  179.78   23.00
  -5  -6 -10  195.68   16.30
  -5  -6  10  179.68   18.50
   5  -6 -10  177.28   12.70
  -6   6  10  -15.10   14.70
  -6  -6 -10   -6.00    8.30
  -6  -6 -10    0.80   10.70
   6   6 -10   -3.90    8.10
  -6  -6  10   -9.00   10.80
   6  -6 -10    1.10    6.70
  -7  -6 -10   43.70    9.50
   7   6 -10   53.29    7.00
  -7   6  10   10.30   13.20
  -7   6 -10   21.30   12.10
   7  -6 -10   52.09    9.30
  -7  -6  10   30.50    8.50
   0   7  10   32.60   23.50
   0   7 -10  -12.40   22.50
   0   7 -10   -8.50   12.40
   0  -7 -10   -0.10    7.70
  -1  -7 -10  300.87   15.60
  -1   7  10  305.97   32.90
   1   7 -10  331.37   34.90
   1   7 -10  296.47   22.00
  -1   7 -10  267.57   22.40
   1  -7 -10  274.77   15.20
   1   7  10  306.57   37.50
  -1   7 -10  365.56   35.60
  -1   7 -10  323.97   24.60
   2   7 -10  291.07   38.00
  -2  -7 -10  247.68   14.00
   2   7 -10  257.67   20.40
  -2   7  10  289.27   32.20
   2   7 -10  220.48   28.10
   2  -7 -10  241.18   14.50
   2   7  10  276.57   37.10
  -2   7 -10  248.98   20.60
   3   7 -10  215.48   31.90
   3   7 -10  215.48   27.50
  -3   7 -10  177.38   18.90
   3   7  10  254.37   37.40
   3  -7 -10  146.89   13.70
   4   7 -10   31.50   17.40
   4  -7 -10   25.20    7.90
   5   7 -10   93.09   13.10
   5   7 -10   47.20   16.50
   5  -7 -10   73.29   11.60
   6   7 -10   73.39    9.50
  -6   7  10   62.29   12.70
  -6  -7 -10   53.89    9.60
  -6  -7  10   59.09    9.20
   6  -7 -10   65.79    9.30
   0   8 -10   -8.70   14.00
   0   8 -10  -20.70   18.00
   0  -8 -10   -0.60    8.80
   1   8 -10  542.05   25.80
  -1  -8 -10  547.25   18.10
   1   8 -10  504.05   34.80
   1  -8 -10  539.95   18.20
  -1   8 -10  509.95   26.10
  -1   8 -10  512.95   27.50
   2   8 -10   40.90   13.40
  -2  -8 -10   43.40    8.90
   2   8 -10   48.60   19.50
   2  -8 -10   44.40    8.10
  -2   8 -10   53.29   13.30
   3   8 -10   23.80   18.40
  -3   8 -10   13.30   12.10
   3  -8 -10  -10.60    7.50
   4   8 -10   81.49   17.20
   4  -8 -10   62.19   10.80
   5   8 -10   58.19    7.70
   5   8 -10   14.20   13.70
   5  -8 -10   70.69    9.40
   0  -9 -10  116.99   10.50
   0   9 -10   94.29   14.80
   0   9 -10   70.09   16.10
   1   9 -10   58.99   17.50
  -1  -9 -10   67.69   10.90
   1   9 -10   23.90   11.90
   1  -9 -10   64.99    8.70
  -1   9 -10   58.49   14.00
   2   9 -10   45.00   17.00
   2   9 -10   84.79   15.90
  -2   9 -10   90.29   16.80
   2  -9 -10  104.09   11.10
  -3   9  10   33.40    9.30
   3   9 -10   16.30   15.00
   3  -9 -10    4.80    6.40
  -3   9 -10    1.80   11.90
   4   9 -10   61.59    8.00
   4   9 -10   50.79   12.70
   4  -9 -10   60.39    7.90
   0  10  10   16.30    8.40
   0  10 -10   15.50   10.60
  -1  10  10  177.68   13.30
   1  10 -10  121.59   16.30
   1  10 -10  133.39   14.80
  -1  10 -10  158.58   17.60
   1  10  10  192.28   12.50
   1 -10 -10  195.58    8.10
   0   0 -11   -5.70   12.00
   0   0  11   15.50   10.00
   1   0  11  549.35   17.90
  -1   0 -11  578.64   23.30
  -1   0  11  626.94   24.30
   1   0 -11  558.34   24.40
   2   0 -11  782.32   28.30
  -2   0 -11  716.63   25.40
  -2   0  11  754.22   28.50
   2   0  11  769.92   29.00
   3   0 -11   27.50   11.80
  -3   0  11   25.70   12.60
   3   0  11   29.20   12.60
  -4   0  11  487.75   28.40
   4   0  11  497.25   28.20
   5   0  11 1385.76   51.79
  -5   0  11 1448.26   36.30
  -5   0 -11 1465.35   39.20
  -5   0  11 1493.55   51.49
  -6   0 -11   36.70    9.00
  -6   0  11   41.50   12.00
  -6   0 -11   51.49   14.20
  -7   0  11   69.29   12.40
   7   0 -11   47.60    8.60
  -7   0 -11   47.70   15.40
  -7   0 -11   64.59    9.80
  -8   0 -11   -2.60    8.50
  -8   0 -11    5.70   14.90
  -8   0  11  -11.90   11.30
   8   0 -11   -8.60    8.00
   9   0 -11    9.80    5.80
  -9   0  11    0.50    8.70
   0  -1  11  209.48   15.80
   0   1 -11  232.08   18.70
   0   1  11  213.28   17.00
   1  -1  11  403.16   20.70
  -1   1  11  401.46   21.50
   1   1 -11  408.86   22.20
   1  -1  11  433.16   15.50
   1   1  11  406.26   16.20
   1  -1 -11  420.96   22.10
  -1   1 -11  427.96   21.20
  -1  -1  11  424.66   21.30
  -2   1  11  318.77   21.80
   2  -1  11  295.87   22.00
   2   1 -11  324.77   21.20
   2   1  11  362.76   15.80
  -2   1 -11  371.76   19.90
  -2  -1  11  348.57   23.60
  -3   1  11 2835.42   71.69
   3   1 -11 2795.52   69.19
   3  -1  11 2747.12   71.49
   3   1  11 2711.93   68.39
  -3  -1  11 2735.53   70.29
   4  -1  11  340.87   25.80
  -4   1  11  347.17   26.10
  -4  -1  11  423.56   29.60
   4   1  11  445.66   24.90
  -5   1  11   50.29   16.40
  -5  -1 -11   80.19   12.40
  -5   1  11   72.39    9.80
  -5  -1 -11   65.99    9.30
   5  -1  11   55.39   17.20
  -5  -1  11   69.49   10.00
  -5  -1  11   58.89   16.70
   5   1  11   90.99   16.40
  -5  -1  11   91.89   13.10
  -5   1 -11   83.49   11.60
   5  -1 -11   60.09    8.10
  -6  -1 -11   13.50    9.00
  -6  -1 -11   33.00   10.00
  -6   1  11   14.40   10.70
  -6  -1 -11   11.40   12.60
  -6   1  11   26.30   13.10
   6  -1 -11    7.10    7.40
  -6  -1  11    5.20   10.80
  -6   1 -11   28.30   13.40
  -6  -1  11   13.30   11.00
  -7   1  11   65.89   12.00
  -7  -1 -11   86.49   14.10
  -7  -1 -11   67.39   14.60
  -7  -1 -11   69.19   10.10
  -7   1  11   69.69   16.30
   7  -1 -11  100.99   13.40
  -7   1 -11   96.99   16.70
  -7  -1  11   89.89   13.00
  -7  -1  11  103.59   14.10
   8   1 -11   52.99    8.90
  -8   1  11   57.69   14.50
  -8   1  11   54.09   12.10
  -8  -1 -11   44.60   10.00
  -8  -1  11   33.90   11.90
  -8   1 -11   41.60   16.30
   8  -1 -11   40.60    8.50
  -9  -1 -11   76.59   11.80
  -9   1  11  129.69   12.60
   9   1 -11   88.69    8.50
  -9   1 -11   74.59   14.40
   9  -1 -11  117.19    9.20
  -9  -1  11  115.09   12.80
   0   2  11   81.39   12.50
   0   2 -11   85.69   17.50
   0  -2  11   61.29   10.00
   0  -2  11   84.79   14.80
  -1   2  11 1604.74   44.20
   1   2 -11 1561.04   45.20
   1  -2  11 1579.24   43.40
  -1  -2  11 1482.75   36.40
  -1   2 -11 1476.55   43.00
  -1  -2  11 1508.45   42.20
   1   2  11 1463.05   40.20
  -2   2  11  206.98   23.00
   2   2 -11  200.28   22.30
   2  -2  11  215.48   22.30
  -2   2 -11  188.68   18.40
   2   2  11  193.88   14.90
  -2  -2  11  190.78   20.60
  -3   2  11  693.43   30.50
   3  -2  11  693.13   31.80
   3   2 -11  702.43   29.80
  -3  -2  11  781.92   34.50
   3   2  11  735.93   25.50
   3   2  11  682.13   29.20
  -4   2  11  161.88   20.20
   4  -2  11  195.28   24.00
   4  -2 -11  146.49   19.90
  -4  -2  11  161.58   22.40
   4   2  11  167.28   19.00
   5   2 -11  418.26   15.20
  -5  -2 -11  457.05   17.10
  -5  -2 -11  419.96   15.10
   5  -2  11  458.55   35.90
  -5   2  11  439.36   16.70
   5  -2 -11  412.06   14.70
  -5   2 -11  410.46   22.20
  -5  -2  11  393.66   22.60
  -5  -2  11  413.16   18.10
  -6   2  11   24.90   10.90
  -6  -2 -11   36.50    9.30
  -6   2  11   27.60   15.70
  -6  -2 -11   40.30   10.40
   6   2 -11   20.30    8.10
  -6  -2  11   13.10   12.30
  -6   2 -11   19.10   14.20
  -6  -2  11   20.60   10.70
   6  -2 -11   17.20    7.10
  -7  -2 -11   78.09   11.40
  -7  -2 -11   96.69   15.00
  -7   2  11   83.49   11.60
  -7   2  11   93.59   16.60
  -7   2 -11   88.19   16.80
  -7  -2  11   91.49   12.30
  -7  -2  11   82.79   14.00
   7  -2 -11  103.09   12.70
  -8  -2 -11   61.59    9.90
  -8  -2 -11   50.89   10.70
   8   2 -11   49.50    8.40
  -8   2  11   66.29   17.90
  -8   2  11   63.49   11.10
  -8   2 -11   55.39   16.50
   8  -2 -11   42.40    8.00
  -8  -2  11   58.59   11.70
  -8  -2  11   47.90   11.40
   9   2 -11   69.19    9.20
  -9  -2 -11   68.49   10.00
  -9   2 -11   52.19   13.50
   9  -2 -11   72.19    8.20
  -9  -2  11   73.39   11.80
   0  -3  11 1822.02   45.50
   0   3 -11 1720.83   50.19
   0   3  11 1837.62   49.40
   1  -3  11  306.37   19.80
   1   3 -11  330.07   23.70
  -1   3  11  327.27   21.40
   1   3  11  272.17   21.60
  -1   3 -11  301.07   21.40
   2   3 -11  494.95   26.60
   2  -3  11  455.85   25.20
  -2   3  11  468.55   26.80
   2   3  11  393.16   20.50
  -2   3 -11  422.46   24.10
   3   3 -11  563.64   29.20
  -3   3  11  583.54   29.90
   3  -3  11  599.64   31.80
   3   3  11  648.44   26.80
   3   3  11  626.84   27.40
  -4   3  11  434.46   30.10
   4  -3  11  467.35   31.20
   4  -3 -11  372.06   32.00
  -5  -3 -11   81.19    9.60
  -5   3  11   84.39   11.90
  -5  -3 -11   79.99   12.70
   5   3 -11  109.69   10.10
  -5  -3  11   84.19    9.50
   5  -3 -11   94.39    9.90
  -5   3 -11   96.29   14.30
  -5  -3  11  104.09   14.50
  -6   3  11   52.49   16.90
   6   3 -11   62.79    9.60
  -6  -3 -11   47.20   11.10
  -6   3  11   54.99   10.90
  -6  -3 -11   65.39   10.40
   6  -3 -11   69.49    9.40
  -6  -3  11   58.59    9.90
  -6   3 -11   51.69   15.40
  -6  -3  11   66.99   14.10
  -7   3  11   39.20   17.50
  -7   3  11   58.79   10.40
  -7  -3 -11   52.49   11.40
  -7  -3 -11   50.39   10.10
   7   3 -11   75.79   10.90
   7  -3 -11   76.99   11.80
  -7  -3  11   46.30   10.80
  -7  -3  11   50.29   14.30
  -7   3 -11   44.70   15.50
  -8  -3 -11   67.39    9.90
  -8   3  11   62.19   17.30
  -8  -3  11   72.89   10.80
   8  -3 -11   77.59   10.90
  -8  -3  11   68.49   12.70
   0   4 -11   10.00   15.50
   0   4  11   25.80   13.60
   1   4 -11   66.39   17.00
  -1   4  11   74.09   14.50
   1  -4  11   40.50   12.00
  -1   4 -11   42.50   15.20
   1   4  11   42.30   14.30
  -2   4  11   39.90   14.70
   2  -4  11   24.70   14.00
   2   4 -11   28.40   16.40
  -2   4 -11   38.60   14.10
   2   4  11    8.20   12.40
  -3   4  11   82.69   17.10
   3   4 -11  107.39   20.50
   3  -4  11  100.29   18.80
   3   4  11   56.49   14.00
   4   4 -11   92.29   14.60
  -4   4  11   79.39   18.40
  -4  -4 -11   87.89   11.60
   4  -4  11   87.79   20.10
  -4  -4 -11   94.59   14.20
   4  -4 -11  114.99   10.00
  -4  -4  11  107.19   15.80
  -4   4 -11   99.69   15.90
  -5   4  11  454.15   26.60
  -5  -4 -11  514.15   21.30
  -5  -4 -11  492.75   18.40
   5   4 -11  517.75   17.90
  -5   4 -11  489.45   24.30
   5  -4 -11  481.65   16.80
  -5  -4  11  478.65   23.70
   6   4 -11   18.50    8.10
  -6  -4 -11   20.00    9.40
  -6  -4 -11   29.30   11.70
  -6   4  11   14.30   16.10
  -6   4 -11   33.30   14.20
  -6  -4  11   26.80   13.90
   6  -4 -11    8.40    8.20
  -6  -4  11   18.70   15.70
  -7  -4 -11   32.50   11.10
  -7  -4 -11   33.00   10.30
  -7   4  11   19.80   16.50
   7   4 -11   34.50    8.20
  -7  -4  11   19.20   12.60
  -7   4 -11   19.20   14.80
  -7  -4  11   52.89   10.30
   7  -4 -11   12.50    7.30
  -8  -4 -11    1.70    8.30
  -8  -4 -11    3.50    9.20
  -8   4  11   -7.70   14.80
  -8  -4  11    4.60    7.90
   8  -4 -11   -0.80    5.60
  -8   4 -11    1.70   14.50
  -8  -4  11    2.50    9.40
   0   5 -11   28.30   18.90
   0   5  11   20.10   13.00
  -1   5  11  139.99   20.30
   1   5 -11  112.29   22.40
  -1   5 -11  148.39   23.10
   1   5  11  101.09   17.40
  -2   5  11   33.70   16.40
   2   5 -11   22.70   13.10
   2   5 -11   23.80   21.00
   2  -5 -11    5.50    5.20
   2  -5 -11    8.00    6.80
  -2   5 -11   10.30   15.20
  -2   5 -11   24.20    9.70
   2   5  11   20.70   15.20
  -3  -5 -11  530.15   18.90
  -3   5  11  539.35   34.80
   3   5 -11  539.15   37.60
   3   5 -11  569.94   28.30
   3  -5  11  515.15   35.90
  -3  -5 -11  528.55   18.00
  -3   5 -11  617.94   22.50
   3   5  11  587.04   32.80
   3  -5 -11  603.64   18.10
   3   5  11  578.14   33.40
  -3  -5  11  576.94   23.40
   3  -5 -11  616.24   16.90
  -4  -5 -11   34.50    9.20
   4   5 -11   13.50   14.90
  -4  -5 -11   23.70    9.80
   4  -5 -11   25.00    6.90
  -4  -5  11   23.00   12.00
  -5  -5 -11   58.49   10.00
   5   5 -11   49.60    9.40
  -5   5  11   18.40   16.20
  -5  -5 -11   25.00   10.90
  -5   5 -11   33.10   14.00
  -5  -5  11   26.20   12.80
   5  -5 -11   38.50    8.60
  -6   5  11   25.60   17.10
   6   5 -11   25.40    9.20
  -6  -5 -11   10.90   10.20
  -6  -5 -11   16.80   11.00
  -6  -5  11   28.30   14.20
  -6   5 -11   15.50   13.80
   6  -5 -11   13.70    7.20
  -7  -5 -11   27.20    9.30
  -7  -5 -11   38.80   11.60
   7   5 -11   24.40    7.60
  -7   5  11   34.00   15.70
   7  -5 -11   37.80    6.90
  -7   5 -11   25.20   13.20
  -7  -5  11   18.60   10.60
  -8  -5 -11   55.79    8.60
  -8   5  11   51.89   11.80
  -8  -5 -11   57.89    7.40
  -8  -5  11   49.80    8.60
   8  -5 -11   63.69    6.90
  -8   5 -11   56.89   11.10
   0   6 -11  472.25   35.50
   0   6 -11  534.15   22.80
   0  -6 -11  540.75   16.90
   0  -6 -11  533.35   17.50
   1   6 -11  204.88   17.70
  -1  -6 -11  196.58   12.50
   1   6 -11  181.38   33.60
  -1   6 -11  152.28   27.20
   1  -6 -11  179.08   13.00
   1  -6 -11  168.68   10.30
  -1   6 -11  170.78   19.20
  -1   6 -11  196.18   21.30
   2   6 -11   26.00   16.10
   2   6 -11   40.70   22.20
   2   6 -11   54.49   11.80
  -2  -6 -11   33.80    7.90
   2  -6 -11   29.70    7.60
  -2   6 -11   57.59   21.00
  -2   6 -11   31.00   11.70
   2  -6 -11   45.40    7.20
   2   6  11   58.19   24.00
   3   6 -11   25.80   15.80
   3   6 -11   52.09   23.40
   3   6  11   54.29   21.10
  -3   6 -11   41.20   12.20
   3  -6 -11   58.49    9.00
   3  -6 -11   52.09    8.10
  -4   6  11   89.39   15.60
   4   6 -11   67.29   18.10
  -4  -6 -11   94.19   10.60
   4  -6 -11  101.79   12.30
  -4  -6  11  119.19   19.00
  -5  -6 -11  162.88   17.00
   5   6 -11  181.18   14.70
  -5   6  11  164.68   23.10
   5   6 -11  119.79   18.80
  -5  -6 -11  163.58   17.80
   5  -6 -11  179.68   12.60
  -5  -6  11  171.28   18.90
  -6  -6 -11   48.10    9.80
  -6  -6 -11   45.90   10.90
  -6   6  11   48.90   14.70
   6   6 -11   55.09    8.80
  -6  -6  11   46.00   11.30
   6  -6 -11   77.19   10.50
   7   6 -11    7.00    6.50
  -7   6  11    9.50   12.00
  -7  -6 -11   12.20    8.40
   7  -6 -11   19.10    5.70
  -7  -6  11   17.70    9.40
   0   7 -11   89.19   15.30
   0   7  11  109.89   27.10
   0   7 -11   98.69   25.70
   0  -7 -11   47.40    8.40
   0   7 -11   88.79   16.90
  -1  -7 -11  132.89   13.30
  -1   7  11  154.98   27.50
   1   7 -11   99.89   18.90
   1   7 -11  143.09   30.10
   1   7 -11  132.39   23.70
  -1   7 -11  216.38   24.70
  -1   7 -11  111.59   19.70
   1   7  11  169.28   34.40
  -1   7 -11  187.18   33.00
   1  -7 -11  168.08   13.20
   2   7 -11  289.77   20.90
  -2   7  11  322.97   35.20
  -2  -7 -11  279.17   14.10
   2   7 -11  218.48   29.90
   2   7 -11  282.87   38.10
  -2   7 -11  213.18   21.20
   2  -7 -11  242.18   14.00
   2   7  11  269.77   36.80
   3   7 -11  135.59   25.90
   3  -7 -11  143.89   13.30
  -3   7 -11  140.19   18.30
   4   7 -11   28.30   18.50
   4  -7 -11   57.09    8.90
   5   7 -11   58.19    9.30
   5   7 -11   24.60   16.70
   5  -7 -11   53.79    7.80
  -6   7  11   14.80   11.70
   6   7 -11    6.20    6.60
  -6  -7  11    9.40    8.00
   6  -7 -11    8.70    6.00
   0   8 -11   -5.30   13.80
   0  -8 -11    6.10    8.10
   0   8 -11    4.40   17.90
  -1  -8 -11    2.30    7.80
   1   8 -11   -0.50   12.40
   1   8 -11  -12.00   18.60
   1  -8 -11    4.20    7.90
  -1   8 -11    5.60   15.30
  -1   8 -11  -12.10   14.10
   2   8 -11   20.90   12.30
   2   8 -11   36.50   19.00
  -2   8 -11   33.90   14.50
   2  -8 -11   20.50    8.00
   3   8 -11   64.69   18.30
   3  -8 -11   60.89    8.30
  -3   8 -11   82.69   13.60
   4   8 -11   27.00   17.80
   4   8 -11   58.29    8.60
   4  -8 -11   45.50    7.40
   5   8 -11   66.09   10.10
   5   8 -11   28.60   12.70
   5  -8 -11  103.09    9.50
   0  -9 -11   38.20    8.00
   0   9 -11   48.00   13.20
   0   9 -11   47.40   16.00
  -1  -9 -11   45.10    7.60
   1   9 -11   22.70   16.20
   1   9 -11   27.20   12.20
   1  -9 -11   43.80    7.60
  -1   9 -11   52.59   13.80
   2   9 -11   84.29   17.00
   2   9 -11   85.49   13.30
   2  -9 -11   85.49   10.30
  -2   9 -11   83.49   13.50
   3   9 -11  182.68   23.10
  -3   9  11  237.08   15.10
   3   9 -11  197.88   10.40
   3  -9 -11  239.38   11.10
  -3   9 -11  152.58   18.00
   4   9 -11   19.40    6.00
   4   9 -11   19.90   11.70
   4  -9 -11   28.00    5.20
   0  10 -11   73.99   13.50
   0  10  11   80.19   13.30
  -1  10  11   19.50    7.80
   1 -10 -11   13.90    5.40
  -1  10 -11    6.90    9.60
   1  10  11   38.60   11.10
   0   0 -12   70.69   15.20
   0   0  12  104.99   13.30
  -1   0  12 1405.26   39.90
  -1   0 -12 1355.96   39.80
   1   0  12 1490.65   36.00
   1   0 -12 1380.06   40.60
   2   0  12   20.60   12.00
   2   0 -12   21.90   13.10
  -2   0  12   -0.80   11.40
  -2   0 -12   25.40   11.60
   3   0 -12  195.48   18.40
  -3   0  12  154.78   19.90
   3   0  12  136.99   19.70
  -4   0  12  136.39   20.40
   4   0  12  143.79   21.10
  -5   0  12  169.28   26.40
  -5   0  12  155.38   15.10
  -5   0 -12  138.69   11.30
  -5   0 -12  131.29   19.30
  -6   0 -12  372.86   21.20
  -6   0  12  349.07   20.10
  -6   0 -12  365.36   15.40
   6   0 -12  344.87   14.70
  -7   0  12  -11.70   11.40
   7   0 -12    4.20    8.10
  -7   0 -12   -3.70    8.90
  -7   0 -12   -5.10   14.90
  -8   0 -12   49.10   17.20
  -8   0 -12   39.10    8.90
  -8   0  12   41.20   11.40
   8   0 -12   35.00    8.80
   9   0 -12   -0.20    5.50
  -9   0  12    4.70    8.50
   0  -1  12  163.98   15.80
   0   1 -12  172.08   19.50
   0   1  12  202.08   16.90
   1  -1  12   27.70    7.30
   1   1 -12   40.00   13.70
   1  -1  12   25.90   11.20
  -1   1  12   32.10   13.20
  -1  -1  12   28.90   12.60
   1   1  12   30.30    8.60
   1  -1 -12   21.10   13.20
  -1   1 -12   52.09   13.20
   2   1 -12  875.81   33.80
   2  -1  12  966.00   33.20
  -2   1  12  961.30   33.80
  -2  -1  12  839.42   31.40
   2   1  12  830.42   24.70
  -2   1 -12  826.22   29.10
   3  -1  12   57.09   13.70
  -3   1  12   92.99   15.50
   3   1 -12   88.19   15.20
  -3  -1  12   80.69   16.70
   3   1  12   74.19   13.70
   4  -1  12  156.18   22.50
  -4   1  12  146.29   22.70
   4   1  12  147.69   19.70
  -4  -1  12  161.58   21.50
   5   1 -12   32.40    6.80
  -5  -1 -12   47.50    8.70
   5  -1  12   41.90   18.90
  -5   1  12   45.40   16.50
  -5  -1 -12   27.00   10.70
  -5   1  12   47.00   10.30
  -5  -1 -12   36.00    8.30
  -5  -1  12   35.90   17.40
  -5  -1  12   41.60   11.40
   5   1  12   26.30   13.10
  -5  -1  12   37.90   10.20
  -5   1 -12   20.50   12.10
   5  -1 -12   18.80    6.80
  -6  -1 -12  125.59   15.90
  -6  -1 -12  103.49   14.30
  -6   1  12  112.59   16.60
   6   1 -12   99.19   10.30
  -6  -1 -12  110.09   11.90
  -6   1  12  106.99   15.00
  -6  -1  12  124.69   17.30
   6  -1 -12   91.09   11.00
  -6  -1  12   84.89   12.70
  -6   1 -12   94.89   13.90
  -7  -1 -12  465.05   18.60
  -7   1  12  508.65   21.30
  -7  -1 -12  522.35   25.00
  -7  -1 -12  520.25   21.90
  -7   1  12  525.95   28.10
   7  -1 -12  560.64   19.50
  -7  -1  12  553.14   23.70
  -7  -1  12  563.64   24.40
  -7   1 -12  565.04   28.10
  -8   1  12  354.66   27.70
   8   1 -12  335.97   15.30
  -8   1  12  318.97   19.40
  -8  -1 -12  344.47   16.10
  -8  -1  12  347.77   19.30
   8  -1 -12  344.67   15.30
  -8   1 -12  370.36   25.60
  -9   1  12   24.10    8.20
  -9  -1 -12   17.60    6.60
   9   1 -12   10.50    5.50
  -9   1 -12   10.80   12.90
  -9  -1  12   25.80    8.30
   9  -1 -12   12.20    5.50
   0  -2  12 4486.35  100.89
   0   2  12 4572.44  102.79
   0   2 -12 4713.93  104.99
   0  -2  12 4633.24  100.79
  -1   2  12  485.15   25.10
   1  -2  12  504.45   23.20
   1   2 -12  490.15   25.80
  -1   2 -12  465.15   23.90
  -1  -2  12  406.96   22.10
  -1  -2  12  419.96   17.40
   1   2  12  408.56   20.90
   2   2 -12  790.12   33.90
  -2   2  12  797.32   32.00
   2  -2  12  810.72   31.40
   2   2  12  760.12   26.40
  -2  -2  12  771.12   32.00
  -2   2 -12  884.21   31.10
  -3   2  12  398.36   25.70
   3   2 -12  387.46   26.30
   3  -2  12  384.16   26.20
  -3  -2  12  400.46   26.70
   3   2  12  398.76   23.00
  -4   2  12  126.09   21.50
   4  -2  12  158.28   24.90
  -4  -2  12  154.98   25.50
   4   2  12  162.08   20.20
   5   2 -12   35.60    7.90
   5  -2  12   20.20   20.30
  -5  -2 -12   37.60    9.90
  -5  -2 -12   30.20    7.90
  -5   2  12   14.00   15.70
  -5   2  12   41.80    9.80
  -5  -2  12   47.70   10.20
  -5  -2  12   37.10   12.90
  -5   2 -12   49.70   13.00
   5  -2 -12   29.20    6.60
  -6  -2 -12  140.99   16.40
  -6   2  12  102.29   15.80
  -6   2  12  108.69   16.80
   6   2 -12  122.09   12.20
  -6  -2 -12  103.59   14.70
  -6   2 -12   86.29   14.70
  -6  -2  12   89.79   13.40
   6  -2 -12  101.99   11.70
  -6  -2  12  106.39   15.90
  -7  -2 -12  219.38   16.00
  -7   2  12  208.58   17.00
  -7  -2 -12  215.98   16.30
  -7   2  12  217.48   27.20
  -7  -2  12  219.68   18.10
  -7  -2  12  210.68   21.60
  -7   2 -12  202.38   24.70
   7  -2 -12  251.67   14.00
   8   2 -12    3.80    6.90
  -8   2  12    5.90   10.40
  -8   2  12  -10.80   15.90
  -8  -2 -12   15.50    9.20
  -8  -2 -12   -3.30   10.90
  -8  -2  12   -4.50   10.30
  -8  -2  12    4.80   10.50
  -8   2 -12    0.00   14.80
   8  -2 -12   12.40    7.00
   9   2 -12   12.00    5.40
  -9  -2 -12    2.10    6.70
  -9   2 -12    2.40   12.80
   9  -2 -12    8.70    5.00
  -9  -2  12    8.40    7.10
   0   3  12   52.59   13.40
   0   3 -12   89.49   18.00
   0  -3  12   72.69   13.00
   1   3 -12  241.28   22.90
  -1   3  12  250.87   20.80
   1  -3  12  231.08   18.50
  -1   3 -12  237.08   20.40
   1   3  12  201.08   17.80
  -2   3  12  738.83   31.30
   2   3 -12  733.33   32.20
   2  -3  12  794.92   33.30
   2   3  12  703.43   27.40
  -2   3 -12  727.23   29.70
  -3   3  12  181.68   23.60
   3  -3  12  152.08   23.20
   3   3 -12  160.68   24.30
   3   3  12  146.79   19.00
   3   3  12  130.79   16.40
  -4  -3 -12  113.09   13.80
  -4  -3 -12  108.79   10.60
  -4   3  12  132.79   20.50
   4   3 -12  117.29    9.90
   4  -3  12   89.49   19.10
  -4  -3  12  110.19   17.80
   4  -3 -12  117.59   10.10
  -5  -3 -12    9.00    8.30
  -5   3  12   20.70    9.40
   5   3 -12   12.20    7.20
  -5  -3 -12    3.50    9.90
   5  -3 -12   12.80    6.70
  -5  -3  12   22.30    8.90
  -5   3 -12   11.90   11.50
  -5  -3  12    4.80   12.10
  -6  -3 -12   84.49   12.50
   6   3 -12   73.39    9.50
  -6   3  12   79.59   18.30
  -6   3  12   80.09   11.10
  -6  -3 -12   67.09    9.70
   6  -3 -12   93.69   12.10
  -6   3 -12   64.79   14.10
  -6  -3  12   57.29   10.20
  -6  -3  12   73.19   13.80
   7   3 -12    9.90    7.60
  -7   3  12   21.30   10.20
  -7  -3 -12   16.50    9.60
  -7   3  12   13.10   16.90
  -7  -3 -12    9.60   11.10
  -7   3 -12    9.70   15.30
   7  -3 -12    5.70    7.70
  -7  -3  12  -10.00   13.50
  -7  -3  12   12.40   10.50
   8   3 -12  595.34   17.80
  -8   3  12  552.74   31.20
  -8  -3 -12  613.04   19.90
  -8  -3 -12  574.14   23.10
   8  -3 -12  593.94   17.30
  -8  -3  12  571.24   23.70
  -8   3 -12  556.44   26.20
  -8  -3  12  590.84   20.00
   0   4  12  476.35   26.40
   0   4 -12  490.25   30.80
   1  -4  12  674.23   29.30
  -1   4  12  742.53   33.10
   1   4 -12  682.13   33.50
  -1   4 -12  665.23   31.40
   1   4  12  691.43   31.70
  -2   4  12   36.50   15.60
   2   4 -12   67.39   18.90
   2  -4  12   36.60   14.10
  -2   4 -12   56.79   15.90
   2   4  12   32.80   12.20
   3  -4  12   18.70   16.30
   3   4 -12   19.70   18.00
  -3   4  12  -18.00   14.70
   3   4  12  -12.40    9.40
  -4   4  12    7.60   15.60
   4   4 -12   19.30   32.70
  -4  -4 -12   50.99    9.20
   4   4 -12   23.80   15.80
  -4  -4 -12   57.79   10.40
   4  -4 -12   57.49    6.80
  -4   4 -12   29.40   11.70
   4  -4 -12   57.59    9.30
  -4  -4  12   55.29   13.00
  -5  -4 -12   41.20    9.70
  -5  -4 -12   27.10   10.80
   5   4 -12   29.90    9.30
  -5   4 -12   46.50   12.50
  -5  -4  12   53.99   14.20
   5  -4 -12   42.60    7.90
  -6  -4 -12  127.79   15.40
  -6  -4 -12  128.39   18.50
  -6   4  12  143.69   24.30
   6   4 -12  137.89   12.30
  -6   4 -12  148.69   22.10
  -6  -4  12  179.58   20.90
   6  -4 -12  185.38   12.80
  -7  -4 -12   49.60   10.10
  -7   4  12   29.80   16.60
   7   4 -12   54.69    8.50
  -7  -4 -12   69.09   11.60
  -7   4 -12   54.39   15.00
   7  -4 -12   65.29   10.50
  -7  -4  12   49.20   10.20
  -7  -4  12   29.30   12.90
  -8   4  12   13.30   13.90
  -8  -4 -12   23.10    8.20
  -8  -4 -12    8.60    9.30
  -8   4 -12   -2.00   11.70
   8  -4 -12    0.80    5.00
  -8  -4  12    5.70    8.30
  -8  -4  12   -8.00    9.70
   0   5  12  346.77   28.60
   0   5 -12  391.76   30.10
  -1   5  12  325.37   25.50
   1   5 -12  320.77   32.70
  -1   5 -12  267.87   26.70
   1   5  12  303.77   27.00
  -2   5  12   64.69   17.40
   2   5 -12   44.90   20.40
   2   5 -12   67.89   12.70
  -2  -5 -12   56.69    9.20
   2   5 -12   59.19   17.00
  -2   5 -12   33.80   10.30
   2  -5 -12   50.99    7.70
   2  -5 -12   27.10    5.80
  -2   5 -12   26.00   18.10
   2   5  12   60.89   16.60
   3   5 -12  202.48   29.40
  -3  -5 -12  220.48   13.40
   3  -5  12  202.48   31.30
  -3  -5 -12  210.38   14.00
   3   5 -12  240.78   21.40
   3   5  12  205.68   26.20
  -3   5 -12  238.88   17.20
  -3  -5  12  246.88   18.00
   3  -5 -12  202.18   11.80
   3  -5 -12  214.18   10.50
  -4  -5 -12   84.69   13.20
   4   5 -12   81.39   17.90
  -4  -5 -12   93.79   14.40
  -4  -5  12   74.79   13.40
   4  -5 -12   67.49    9.60
  -5  -5 -12   29.50    9.30
  -5   5  12   40.60   16.30
  -5  -5 -12   38.70   10.30
   5   5 -12   51.59    9.50
   5  -5 -12   52.49    8.20
  -5  -5  12   35.50   13.50
  -5   5 -12   28.30   13.70
   6   5 -12   13.10    8.00
  -6   5  12   -5.50   16.40
  -6  -5 -12    7.10   10.60
  -6  -5 -12   11.80   10.10
  -6   5 -12   38.80   14.60
   6  -5 -12   28.30    7.30
  -6  -5  12   13.70   13.60
  -7  -5 -12   63.59   12.30
  -7   5  12   87.79   16.60
   7   5 -12   69.69   10.70
  -7  -5 -12   71.39   10.30
  -7   5 -12   51.79   13.50
  -7  -5  12   68.69   11.10
   7  -5 -12   80.39    9.30
  -8   5  12   83.59   12.40
  -8  -5  12  116.79   12.20
   8  -5 -12  121.99    7.40
   0   6 -12  212.28   19.30
   0  -6 -12  205.88   10.50
   0   6 -12  179.98   30.00
   0   6 -12  194.98   21.40
   0  -6 -12  194.68   12.10
   1   6 -12   49.00   15.70
   1   6 -12   42.70   11.70
  -1  -6 -12   28.00    7.60
   1   6 -12   53.79   24.90
  -1   6 -12   97.79   17.00
  -1   6 -12   46.30   12.60
  -1   6 -12   54.99   21.60
   1  -6 -12   48.80    8.20
   1  -6 -12   59.49    7.80
   2   6 -12   73.39   24.80
   2   6 -12   58.39   12.50
   2   6 -12   26.90   17.40
  -2  -6 -12   58.89    9.40
   2  -6 -12   59.99    7.70
   2   6  12   94.29   24.20
   2  -6 -12   66.09    9.90
  -2   6 -12   64.79   13.30
   3   6 -12   57.19   17.60
   3   6 -12   52.59   26.40
  -3   6 -12   50.09   12.20
   3   6  12   63.79   21.90
   3  -6 -12   31.30    8.40
   3  -6 -12   58.99    9.10
   4   6 -12   26.90   18.30
  -4  -6 -12    7.60   10.20
  -4   6  12   35.20   15.30
   4  -6 -12   45.90    8.90
  -4  -6  12   50.09   12.40
  -5   6  12  135.39   22.90
   5   6 -12  148.59   26.40
   5   6 -12  185.18   13.90
  -5  -6 -12  139.39   18.40
  -5  -6 -12  149.19   14.30
  -5  -6  12  134.59   18.90
   5  -6 -12  165.78   12.30
   6   6 -12   30.30    8.40
  -6   6  12   36.60   14.10
  -6  -6 -12   30.70   10.40
   6  -6 -12   42.40    7.30
  -6  -6  12   39.70   11.80
   7   6 -12   10.10    6.30
  -7   6  12   -3.00   13.30
   7  -6 -12   16.30    5.30
  -7  -6  12   10.60    8.80
   0  -7 -12  135.79   13.30
   0   7 -12  169.28   30.60
   0   7  12  220.28   36.70
   0   7 -12  161.18   26.20
   0   7 -12  143.59   18.90
   1   7 -12  197.48   33.50
  -1   7  12  245.38   36.60
   1   7 -12  162.58   28.50
  -1  -7 -12  188.08   13.60
   1   7 -12  155.48   20.90
  -1   7 -12  181.88   34.10
  -1   7 -12  173.88   23.20
   1   7  12  178.18   33.60
   1  -7 -12  175.88   13.30
  -1   7 -12  162.08   21.20
  -2   7  12   26.30   21.40
   2   7 -12    2.20   24.80
   2   7 -12   -3.70   12.00
  -2  -7 -12    2.50    7.70
   2   7 -12    5.50   19.20
  -2   7 -12   -0.70   13.00
   2   7  12   35.80   22.60
   2  -7 -12    5.90    8.10
   3   7 -12  283.67   29.30
   3  -7 -12  293.17   14.70
  -3   7 -12  298.37   21.70
   4   7 -12   41.50   19.00
   4  -7 -12   16.10    7.80
   5   7 -12    5.80   15.40
   5   7 -12   29.10    8.40
   5  -7 -12    9.90    7.10
  -6   7  12   24.00   11.60
   6   7 -12   19.90    7.10
  -6  -7  12    2.80    8.20
   6  -7 -12    1.60    5.60
   0   8 -12  197.98   26.20
   0  -8 -12  207.28   13.50
   0   8 -12  219.38   22.30
  -1  -8 -12   17.80    8.60
   1   8 -12   45.10   14.80
   1   8 -12   22.60   17.70
  -1   8 -12   30.90   14.90
   1  -8 -12   24.60    8.50
  -1   8 -12   38.60   14.60
   2   8 -12    4.70   12.00
   2   8 -12   10.20   17.80
  -2   8 -12   -9.50   13.20
   2  -8 -12    8.10    7.60
   3   8 -12  124.69   25.20
   3  -8 -12  146.39   11.90
  -3   8 -12  132.39   21.30
   4   8 -12   60.99    8.70
   4   8 -12   76.19   16.70
   4  -8 -12   54.49    7.40
   5   8 -12   -4.00   11.30
   5   8 -12   24.40    7.40
   5  -8 -12   18.70    5.60
   0   9 -12   14.50   13.00
   0   9 -12    3.60   14.50
   0  -9 -12    7.30    7.40
  -1  -9 -12   -8.10    6.60
   1   9 -12   23.20   17.20
   1   9 -12   -1.70   11.30
   1  -9 -12    4.60    6.70
  -1   9 -12   22.00   12.90
   2   9 -12   25.60   16.10
   2   9 -12    4.40    6.80
   2   9 -12  -10.00   10.90
   2  -9 -12   15.80    6.40
  -2   9 -12   -2.10   13.90
   3   9 -12  136.39   10.50
  -3   9  12  183.38   16.70
   3   9 -12  143.89   20.80
  -3   9 -12   88.79   16.00
   3  -9 -12  155.68    9.70
   4   9 -12   55.49    8.10
   4  -9 -12   62.99    7.10
   0   0 -13    0.50   13.50
   0   0  13   21.60    9.80
  -1   0 -13  811.32   29.20
   1   0  13  809.72   24.90
  -1   0  13  785.42   29.20
   1   0 -13  764.72   30.40
   2   0 -13   -1.40   14.20
   2   0  13    1.30   11.60
  -2   0 -13    5.60   11.50
  -2   0  13   -7.00   11.50
   3   0  13  688.43   31.20
   3   0 -13  647.14   28.30
  -3   0  13  695.43   30.50
   4   0  13  431.46   29.90
  -4   0  13  457.75   30.90
  -5   0  13   18.00   16.40
  -5   0  13   16.80   10.20
   5   0 -13   12.80    6.30
  -5   0 -13    2.90    8.40
  -5   0  13   18.80   10.10
  -5   0 -13   13.80   10.90
  -5   0 -13   19.30    7.20
   5   0  13    8.30   14.40
  -6   0 -13   59.59   15.00
  -6   0  13   30.80   11.80
  -6   0 -13   39.00    9.30
   6   0 -13   21.90    6.90
  -6   0 -13   40.40   14.50
  -7   0 -13  339.97   15.70
  -7   0  13  315.97   20.40
  -7   0 -13  351.86   24.60
   7   0 -13  336.87   15.40
  -8   0 -13   44.20    8.20
  -8   0 -13   26.60   15.40
   8   0 -13   39.20    7.90
  -8   0  13   29.00   11.10
   9   0 -13   11.10    5.20
  -9   0  13    3.00    8.40
   0  -1  13 4233.88   94.89
   0   1  13 4087.89   95.09
   0   1 -13 4550.64   98.99
   1  -1  13  193.48   13.90
  -1   1  13  183.98   19.80
   1   1 -13  205.28   21.10
   1  -1  13  186.08   18.90
   1   1  13  223.68   14.70
  -1   1 -13  204.28   19.50
   1  -1 -13  193.08   20.40
  -1  -1  13  222.38   20.70
   2  -1  13  377.46   25.70
   2   1 -13  376.56   23.40
  -2   1  13  378.06   23.30
   2   1  13  437.66   17.70
  -2  -1  13  451.65   24.90
  -2   1 -13  477.45   22.40
   3   1 -13   85.29   16.40
   3  -1  13   71.49   15.00
  -3   1  13   46.20   14.60
   3   1  13   57.29   13.40
  -3  -1  13   63.49   15.10
   4  -1  13  751.72   35.30
  -4   1  13  784.52   36.30
   4   1  13  821.92   34.20
  -4  -1  13  770.02   37.00
  -5  -1 -13   48.50   12.80
  -5   1  13   51.99   10.30
  -5   1  13   52.49   17.90
  -5  -1 -13   69.89    9.50
   5  -1  13   53.59   18.70
  -5  -1 -13   66.19    9.40
   5   1 -13   61.79    8.00
   5  -1 -13   53.89    8.30
  -5  -1  13   71.39   19.40
  -5   1 -13   61.19   11.60
   5  -1 -13   48.40    6.90
  -5  -1  13   85.09   12.70
   5   1  13   71.89   16.50
  -5  -1  13   65.19   10.30
  -6   1  13   62.79   11.10
  -6   1  13   80.79   15.20
   6   1 -13   71.29   10.20
  -6  -1 -13   97.79   14.40
  -6  -1 -13   99.69   14.40
  -6  -1 -13  104.59   13.80
  -6  -1  13  109.49   17.60
  -6  -1  13  103.09   12.90
   6  -1 -13  102.49   10.10
  -6   1 -13  125.29   22.00
  -7   1  13   16.90   11.00
  -7  -1 -13   15.60   10.10
  -7  -1 -13   10.30    8.80
   7   1 -13   16.20    8.40
  -7  -1 -13   19.30   15.50
  -7   1  13   13.60   15.20
  -7  -1  13    2.00   12.40
   7  -1 -13    5.00    7.90
  -7  -1  13   14.70   11.10
  -7   1 -13    6.90   14.50
  -8  -1 -13   48.50    9.10
  -8   1  13   34.00   11.30
   8   1 -13   41.00    7.90
  -8  -1  13   58.99   11.50
   8  -1 -13   62.19    8.20
  -8   1 -13   49.99   15.10
   9   1 -13   95.49    8.00
  -9  -1 -13   76.19    8.60
  -9   1  13   97.49   11.10
  -9  -1  13   87.69   12.70
   9  -1 -13   93.79    8.20
  -9   1 -13   47.90   12.80
   0   2  13  555.44   24.30
   0  -2  13  518.55   22.60
   0  -2  13  537.15   22.90
   0   2 -13  540.95   27.30
   1  -2  13 1478.35   42.50
   1   2 -13 1432.36   45.20
  -1   2  13 1489.85   43.00
  -1  -2  13 1450.25   37.50
  -1  -2  13 1415.16   41.80
   1   2  13 1376.06   39.80
  -1   2 -13 1446.46   42.90
  -2   2  13  443.66   24.60
   2   2 -13  422.06   29.10
   2  -2  13  456.05   24.60
  -2   2 -13  405.16   22.70
  -2  -2  13  424.16   27.00
   2   2  13  417.66   19.60
   3  -2  13  609.94   31.30
   3   2 -13  585.34   28.80
  -3   2  13  605.74   29.60
  -3  -2  13  583.14   30.90
   3   2  13  601.74   29.80
   4  -2  13  613.54   33.70
  -4   2  13  618.34   30.80
   4   2  13  623.94   30.00
  -4  -2  13  594.44   33.20
  -5   2  13  180.88   16.30
  -5  -2 -13  129.99   13.10
  -5   2  13  161.88   25.90
  -5  -2 -13  142.99   15.30
   5   2 -13  150.58   11.10
  -5  -2  13  125.19   17.90
   5  -2 -13  118.39   10.30
  -5   2 -13  140.59   17.00
  -5  -2  13  127.19   15.60
  -6  -2 -13  275.37   15.70
  -6   2  13  281.57   18.00
  -6   2  13  308.27   26.00
  -6  -2 -13  292.97   18.00
   6   2 -13  299.87   14.20
  -6   2 -13  240.68   23.80
  -6  -2  13  216.98   15.60
  -6  -2  13  236.38   20.40
   6  -2 -13  239.38   13.50
  -7  -2 -13   79.09   11.10
  -7   2  13  106.59   18.00
  -7  -2 -13  115.99   18.50
  -7   2  13   77.99   11.60
  -7  -2  13   63.19   13.90
  -7   2 -13   55.19   15.40
   7  -2 -13   78.09   12.40
  -7  -2  13   77.09   12.10
  -8  -2 -13   15.60    8.90
  -8  -2 -13    7.30   10.00
  -8   2  13   35.80   16.90
  -8   2  13   19.50   10.70
   8   2 -13   14.60    7.40
  -8   2 -13   25.50   14.80
   8  -2 -13   24.20    7.20
  -8  -2  13   16.50   11.00
  -8  -2  13   24.40   10.90
   9   2 -13    8.70    5.00
  -9  -2 -13   10.60    7.80
  -9   2 -13  -10.20   11.90
   9  -2 -13   12.70    4.50
  -9  -2  13   24.20    6.80
   0   3  13   10.00   11.90
   0   3 -13    2.50   14.30
   0  -3  13    5.00    8.60
   1  -3  13   72.69   13.60
  -1   3  13   85.29   14.60
   1   3 -13   85.89   17.90
   1   3  13   78.49   13.60
  -1   3 -13   71.89   16.20
  -2   3  13  778.12   32.60
   2  -3  13  840.92   33.90
   2   3 -13  815.62   35.00
   2   3  13  740.63   28.90
  -2   3 -13  711.63   33.00
   3  -3  13  302.77   27.20
   3   3 -13  270.07   28.20
  -3   3  13  259.77   27.70
   3   3  13  210.58   19.30
   4  -3  13  825.72   40.90
  -4  -3 -13  848.82   24.60
   4   3 -13  842.42   21.70
  -4  -3 -13  826.42   23.00
  -4   3  13  898.11   39.10
  -4   3 -13  845.72   27.00
  -4  -3  13  832.02   26.00
   4  -3 -13  785.22   21.10
  -5   3  13   23.10    9.70
  -5  -3 -13   39.80   10.00
  -5  -3 -13   40.00   10.40
   5   3 -13   34.30    8.50
   5  -3 -13   35.40    7.60
  -5  -3  13   33.40   12.30
  -5  -3  13   37.80    8.90
  -5   3 -13   19.10   12.00
   6   3 -13   84.49   12.50
  -6  -3 -13   86.69   10.90
  -6   3  13   75.19   11.50
  -6  -3 -13   75.59   11.50
  -6   3  13   84.69   18.70
  -6   3 -13   83.49   16.00
  -6  -3  13   90.59   15.10
  -6  -3  13   99.59   15.30
   6  -3 -13   78.49   11.70
  -7   3  13  178.38   16.90
  -7  -3 -13  182.28   18.30
  -7  -3 -13  201.48   16.20
   7   3 -13  174.68   11.90
  -7   3  13  142.59   25.80
   7  -3 -13  207.58   13.80
  -7  -3  13  176.88   17.00
  -7  -3  13  164.28   21.10
  -7   3 -13  174.68   24.50
  -8   3  13  140.39   24.10
  -8  -3 -13  124.99   13.50
  -8  -3 -13  128.19   16.10
   8   3 -13  107.49   11.50
  -8   3 -13  144.59   19.30
  -8  -3  13  108.19   14.60
   8  -3 -13  114.39   10.30
  -8  -3  13  116.89   17.00
   0   4 -13   15.00   16.50
   0   4  13   25.60   12.80
  -1   4  13  339.07   24.30
   1   4 -13  296.67   27.50
  -1   4 -13  299.57   25.50
   1   4  13  331.77   24.90
  -2   4  13  216.78   24.60
   2   4 -13  233.58   26.90
   2  -4  13  227.98   22.40
   2   4  13  296.07   24.30
  -2   4 -13  188.48   24.10
   3  -4  13  134.39   24.00
   3   4 -13  175.28   21.00
   3   4 -13  164.78   28.60
  -3  -4 -13  151.68   12.00
  -3   4  13  183.18   22.70
  -3  -4 -13  192.58   12.90
   3  -4 -13  195.18    9.60
  -3  -4  13  155.08   17.80
   3   4  13  170.18   19.90
  -4  -4 -13  238.38   14.40
   4   4 -13  185.78   40.60
  -4  -4 -13  227.48   16.10
   4   4 -13  199.28   25.60
   4   4 -13  243.18   12.10
   4  -4 -13  248.78   12.50
   4  -4 -13  226.18    9.90
  -4   4 -13  240.08   19.20
  -4  -4  13  237.08   21.00
  -5  -4 -13  289.47   16.20
   5   4 -13  311.07   14.80
  -5  -4 -13  290.87   17.70
   5  -4 -13  298.97   13.20
  -5   4 -13  298.27   22.30
  -5  -4  13  282.07   22.50
  -6   4  13   14.20   17.10
   6   4 -13   18.80    9.00
  -6  -4 -13   24.00   11.90
  -6  -4 -13   13.00   10.10
  -6  -4  13   16.50   13.30
   6  -4 -13   22.40    7.70
  -6   4 -13   32.50   15.10
  -7  -4 -13  118.59   19.40
   7   4 -13  117.19   11.50
  -7  -4 -13  114.39   14.60
  -7   4  13  117.39   18.10
  -7  -4  13  115.49   13.30
  -7   4 -13   97.09   15.60
   7  -4 -13  107.79   10.90
  -7  -4  13  122.59   20.40
   8   4 -13   29.00    6.50
  -8  -4 -13   28.00    9.10
  -8   4  13   27.40   15.40
   8  -4 -13   35.30    5.60
  -8  -4  13   40.50    9.60
  -8   4 -13   30.60   12.40
   0   5 -13   27.30   18.80
   0   5  13   20.20   13.50
   0  -5 -13   25.90    6.20
   0   5 -13   40.20   10.80
   1   5 -13  329.37   33.50
  -1  -5 -13  250.47   12.20
   1   5 -13  314.47   22.00
   1   5 -13  293.47   17.00
  -1   5  13  286.87   25.20
  -1   5 -13  324.57   19.40
   1  -5 -13  307.57   11.90
  -1   5 -13  353.26   31.00
   1   5  13  300.97   24.70
   1  -5 -13  304.87   17.80
  -2  -5 -13  510.55   17.30
   2   5 -13  546.65   28.20
  -2   5  13  575.34   31.80
   2   5 -13  527.05   36.20
   2   5 -13  506.65   21.50
  -2   5 -13  510.45   33.80
   2  -5 -13  545.45   17.10
  -2   5 -13  522.55   22.20
   2   5  13  548.05   32.20
   2  -5 -13  525.15   15.40
   3   5 -13  115.99   26.40
   3   5 -13  110.29   18.50
  -3  -5 -13   93.09   12.40
  -3  -5 -13  111.59   13.20
  -3  -5  13  119.59   17.60
   3  -5 -13  127.79    8.60
   3  -5 -13  125.89   10.80
  -3   5 -13   93.19   16.10
  -4  -5 -13  147.99   14.60
   4   5 -13  144.79   24.90
  -4  -5 -13  126.09   14.30
  -4  -5  13  170.48   19.40
   4  -5 -13  138.69   10.60
   4  -5 -13  149.29    9.60
   5   5 -13   45.10   10.00
  -5  -5 -13   39.10    9.90
  -5   5  13   34.20   16.50
  -5  -5 -13   30.70   10.20
  -5  -5  13   16.30   12.70
   5  -5 -13   39.70    8.00
  -5   5 -13   22.30   14.20
  -6   5  13   41.60   16.30
   6   5 -13   16.30    8.30
  -6  -5 -13   25.50   10.20
  -6  -5 -13   31.30   12.10
   6  -5 -13   17.60    7.10
  -6  -5  13   11.00   13.20
  -6   5 -13    6.30   14.20
   7   5 -13   90.69   10.80
  -7  -5 -13  118.29   16.80
  -7  -5 -13   94.79   11.90
  -7   5  13   98.79   17.10
   7  -5 -13   83.09    8.90
  -7   5 -13   68.19   13.50
  -7  -5  13   98.09   12.20
   0   6 -13    2.00   12.00
   0  -6 -13   -1.10    6.10
   0  -6 -13    9.80    7.00
   0   6 -13    1.20   14.00
   0   6 -13   11.80   21.80
   1   6 -13   49.99   13.10
   1   6 -13   17.90   15.30
   1   6 -13   54.59   24.40
  -1  -6 -13   34.90    7.80
  -1   6 -13   41.90   12.30
  -1   6 -13   47.50   22.80
  -1   6 -13   60.69   15.70
   1  -6 -13   53.69    7.90
   1  -6 -13   68.09   10.00
  -2  -6 -13   10.40    8.10
   2   6 -13    1.60   15.60
   2   6 -13    2.30   12.20
   2   6 -13    2.50   26.20
  -2   6 -13    3.30   11.00
   2   6  13   34.70   22.60
   2  -6 -13   13.50    6.20
   2  -6 -13    8.30    7.00
   3   6 -13   99.29   18.70
   3   6 -13   66.89   26.60
   3  -6 -13  126.19   12.50
   3   6  13  150.18   29.00
  -3   6 -13  130.49   18.30
   3  -6 -13  130.39   10.10
   4   6 -13  206.38   26.70
  -4  -6 -13  223.68   16.50
  -4   6  13  241.28   24.70
  -4  -6  13  206.58   19.40
   4  -6 -13  229.78   13.70
   5   6 -13   91.29   18.40
  -5  -6 -13  138.59   17.10
  -5   6  13  151.08   23.90
   5   6 -13  152.78   13.40
  -5  -6  13  121.69   18.90
   5  -6 -13  136.29   12.00
  -6   6  13  101.89   15.20
   6   6 -13  147.29   11.60
  -6  -6 -13  123.79   17.30
   6  -6 -13  135.39   11.20
  -6  -6  13  105.89   17.50
   7   6 -13   55.89    8.10
  -7   6  13   81.19   13.70
  -7  -6  13   48.30    8.80
   7  -6 -13   84.19    8.30
   0  -7 -13  215.98   14.60
   0   7 -13  217.48   26.50
   0   7 -13  222.88   22.40
   0   7  13  254.97   37.40
   0   7 -13  236.18   37.30
   1   7 -13  417.16   30.20
  -1  -7 -13  411.36   16.30
   1   7 -13  383.06   43.00
  -1   7  13  481.35   41.00
   1   7 -13  379.96   21.80
  -1   7 -13  454.75   27.80
   1  -7 -13  439.46   17.10
  -1   7 -13  448.46   25.40
   1   7  13  457.35   39.00
  -1   7 -13  435.16   38.30
   2   7 -13   40.50   17.70
  -2   7  13   52.09   22.00
   2   7 -13   64.99   13.50
   2   7 -13   43.70   27.30
  -2  -7 -13   66.09   10.60
   2  -7 -13  117.39   12.50
   2   7  13  113.29   24.20
   2  -7 -13  130.49   10.60
  -2   7 -13  104.09   19.80
   3   7 -13   18.80   18.90
   3  -7 -13   -1.50    7.90
   3  -7 -13    8.20    5.90
  -3   7 -13   -2.90   12.60
   4   7 -13  206.98   14.10
   4   7 -13  208.48   30.10
   4  -7 -13  153.88   12.90
   5   7 -13   -8.70   14.60
   5   7 -13   25.40    8.40
   5  -7 -13    9.00    6.90
  -6   7  13   19.10   11.10
   6   7 -13    1.00    6.70
   6  -7 -13    4.00    5.40
  -6  -7  13    8.10    8.60
   0   8 -13   27.60   16.10
   0  -8 -13   29.10    8.90
   0   8 -13   25.20   14.90
  -1  -8 -13   70.09    8.90
   1   8 -13   53.79   14.00
   1   8 -13   77.79   17.90
  -1   8 -13   80.89   23.00
   1  -8 -13   81.19   12.30
  -1   8 -13   79.39   15.20
   2   8 -13    1.30   11.90
   2   8 -13   -2.20   18.60
   2  -8 -13    2.20    7.50
  -2   8 -13    2.10   13.40
   3   8 -13   21.20   18.20
   3   8 -13    9.10    7.90
   3  -8 -13   11.00    7.40
  -3   8 -13    7.10   12.80
   4   8 -13   96.89   10.70
   4   8 -13   78.49   17.70
   4  -8 -13  135.29   10.40
   5   8 -13   59.29    8.40
   5   8 -13   21.30   15.40
   5  -8 -13   53.59    7.70
   0  -9 -13   96.19   10.30
   0   9 -13   82.79   18.00
   0   9 -13   90.49   18.00
   1   9 -13   69.39   14.20
   1   9 -13  100.09   17.20
   1  -9 -13  123.39   10.90
  -1   9 -13  125.49   23.30
   2   9 -13   48.60   17.70
   2   9 -13   15.30   11.20
   2   9 -13   26.40   11.40
  -2   9 -13   61.29   14.10
   2  -9 -13   54.59    9.20
   3   9 -13   17.20   15.30
   3   9 -13   20.70    6.10
   3  -9 -13   37.70    6.00
  -3   9 -13    0.70    9.00
   0   0 -14 2168.08   56.39
   0   0  14 2065.89   52.39
  -1   0  14  115.79   19.70
  -1   0 -14   90.99   15.00
   1   0 -14   93.69   19.70
  -2   0 -14   42.20   13.60
   2   0 -14   39.00   14.10
  -2   0  14   24.20   13.80
   2   0  14   43.30   13.60
   3   0 -14  422.76   24.80
  -3   0  14  422.46   26.00
   3   0  14  441.56   27.10
   4   0  14  478.55   29.60
  -4   0  14  474.15   32.20
  -5   0  14   20.30   15.50
  -5   0  14   19.00   10.90
   5   0  14   15.20   15.00
  -5   0 -14   13.40    9.00
  -5   0  14   24.20   10.40
   5   0 -14   14.50    6.30
  -5   0 -14    9.40   11.30
  -5   0 -14   12.80    7.20
  -6   0 -14  126.39   13.00
  -6   0  14  121.19   19.20
   6   0 -14  114.49   10.60
  -6   0  14  119.49   18.30
  -6   0 -14  120.09   17.50
  -6   0 -14  122.39   19.50
   6   0 -14  124.09   10.40
   7   0 -14  114.29   11.70
  -7   0 -14  100.89   13.30
  -7   0  14  118.59   17.20
  -7   0 -14   77.69   15.80
  -8   0  14   -6.80   11.20
  -8   0 -14   -1.20    8.20
   8   0 -14   -1.40    6.80
  -8   0 -14    8.40   14.90
  -9   0  14   38.80    7.90
   9   0 -14   26.00    5.00
   0  -1  14  384.36   20.30
   0   1 -14  367.86   24.50
   0   1  14  395.46   20.50
   1  -1  14  357.46   24.90
  -1   1  14  381.96   22.30
   1  -1  14  353.76   17.40
   1   1 -14  389.96   26.80
  -1   1 -14  392.56   22.40
  -1  -1  14  414.16   22.60
   1  -1 -14  364.76   25.00
   1   1  14  413.56   18.40
  -2   1  14  133.79   21.00
   2  -1  14  144.69   20.40
   2   1 -14  151.58   20.30
  -2   1 -14  160.48   19.60
  -2  -1  14  135.49   19.20
   2   1  14  142.59   12.90
  -3   1  14  344.57   27.30
   3   1 -14  343.77   25.10
   3  -1  14  331.27   25.20
  -3  -1  14  350.66   25.50
   3   1  14  378.56   25.00
   4  -1  14  361.86   28.20
  -4   1  14  337.37   28.40
  -4  -1  14  350.16   27.00
   4   1  14  325.57   25.30
   5   1 -14   17.10    6.90
  -5   1  14    7.90   16.00
  -5   1  14   20.60   10.40
  -5  -1 -14   31.60    9.10
   5  -1  14   31.20   22.40
  -5  -1 -14   22.40    8.00
  -5  -1 -14   13.80   10.60
  -5  -1  14   12.20   12.00
  -5   1 -14   17.50   11.30
   5   1  14   40.50   15.50
   5  -1 -14    9.00    6.10
  -5  -1  14   15.90    9.30
   5  -1 -14    8.30    6.00
  -5  -1  14    6.70   17.40
  -6  -1 -14  155.78   16.30
  -6  -1 -14  164.18   20.30
  -6   1  14  176.68   17.20
   6   1 -14  174.68   10.60
  -6   1  14  192.58   21.20
  -6  -1 -14  173.28   14.10
  -6   1 -14  197.98   19.60
  -6  -1  14  181.58   18.50
   6  -1 -14  218.08   13.00
  -6  -1  14  212.18   19.40
   7   1 -14  512.35   17.30
  -7  -1 -14  475.55   21.40
  -7   1  14  459.65   28.80
  -7   1  14  490.65   21.30
  -7  -1 -14  464.75   18.30
  -7  -1 -14  486.65   28.00
  -7  -1  14  493.75   24.20
  -7  -1  14  496.15   22.10
  -7   1 -14  543.05   28.50
   7  -1 -14  511.95   17.20
   8   1 -14  376.56   15.30
  -8   1  14  367.76   18.50
  -8  -1 -14  341.27   15.60
  -8   1 -14  385.36   25.00
   8  -1 -14  415.16   15.10
  -8  -1  14  411.26   19.40
  -9   1  14    6.40    7.90
   9   1 -14   11.00    4.70
   9  -1 -14    4.80    4.90
  -9  -1  14   12.20    7.90
   0  -2  14  958.70   31.50
   0   2 -14  979.40   36.70
   0  -2  14  990.80   32.20
   0   2  14 1003.70   32.90
   1  -2  14 2016.80   53.89
  -1   2  14 1982.60   54.49
   1   2 -14 2066.39   57.79
  -1   2 -14 2037.30   54.29
  -1  -2  14 1951.30   49.30
   1   2  14 1962.50   51.29
  -1  -2  14 2004.40   53.79
  -2   2  14   41.60   13.20
   2  -2  14   23.00   12.40
   2   2 -14   58.39   16.20
   2   2  14   22.90    8.90
  -2  -2  14   20.90   13.10
  -2   2 -14   15.10   14.90
   3   2 -14   99.19   20.10
  -3   2  14   75.99   15.30
   3  -2  14   84.69   17.00
   3   2  14   90.49   15.90
  -3  -2  14  119.59   20.90
  -4   2  14  339.87   28.60
   4  -2  14  321.97   27.70
   4   2  14  429.36   27.50
  -4  -2  14  403.86   31.80
   5   2 -14   14.40    7.70
  -5  -2 -14   11.80    7.40
  -5  -2 -14   16.30    9.90
  -5   2  14   17.80   10.60
  -5  -2  14   11.90   11.50
   5  -2 -14    3.10    6.10
  -5   2 -14   19.50   12.00
   5  -2 -14    7.50    6.20
  -5  -2  14   13.10    9.90
   6   2 -14   80.79   11.60
  -6  -2 -14   78.49   11.20
  -6  -2 -14  102.59   14.90
  -6   2  14   90.89   18.40
  -6   2  14   98.29   12.70
   6  -2 -14   79.09   11.20
  -6   2 -14   97.09   16.00
  -6  -2  14   80.99   11.30
  -6  -2  14  113.09   14.40
  -7   2  14   72.59   11.50
  -7  -2 -14   66.99   10.90
  -7  -2 -14   89.89   12.20
   7   2 -14   93.79   11.20
  -7   2  14   98.89   18.40
  -7  -2  14   58.69   11.40
  -7   2 -14  129.39   18.00
  -7  -2  14   72.39   13.60
   7  -2 -14   85.09   12.50
  -8  -2 -14   63.79    9.80
   8   2 -14   52.19    8.00
  -8   2  14   79.39   11.40
  -8   2  14   62.89   17.30
  -8  -2  14   64.99   10.70
  -8   2 -14   60.39   15.00
   8  -2 -14   63.19   11.00
  -8  -2  14   58.79   10.90
   0  -3  14  671.33   25.70
   0   3  14  681.03   30.10
   0   3 -14  691.83   31.80
   1   3 -14  237.78   24.30
  -1   3  14  264.67   23.50
   1  -3  14  237.68   21.60
   1   3  14  272.77   19.60
  -1   3 -14  241.48   23.60
  -2   3  14   35.90   14.60
   2  -3  14   53.99   13.90
   2   3 -14   52.99   18.10
   2   3  14   39.00   11.40
  -2   3 -14   48.30   17.20
   3   3 -14  107.49   20.90
   3  -3  14  138.39   23.20
  -3   3  14  108.29   18.60
   3   3  14   82.29   15.20
  -4   3  14  611.44   34.00
   4   3 -14  607.24   18.30
   4   3 -14  578.24   27.30
   4  -3  14  644.74   37.50
  -4  -3 -14  624.44   20.70
  -4  -3 -14  612.14   18.60
  -4  -3  14  523.65   22.00
  -4   3 -14  566.74   23.10
   4  -3 -14  536.45   16.70
   4  -3 -14  532.95   15.90
  -5  -3 -14   92.79   14.30
  -5   3  14   84.29   11.80
  -5  -3 -14   58.49    9.80
   5   3 -14   56.19    8.90
   5  -3 -14   68.49   10.50
  -5  -3  14   59.99   13.60
  -5   3 -14   70.89   14.00
  -5  -3  14   67.49    9.30
  -6   3  14  144.39   16.30
  -6  -3 -14  157.38   16.40
   6   3 -14  152.38   13.10
  -6  -3 -14  151.68   17.20
  -6   3  14  167.58   20.10
  -6  -3  14  128.79   16.00
   6  -3 -14  146.39   11.10
  -6   3 -14  110.19   16.10
  -6  -3  14  131.79   21.50
  -7  -3 -14  124.89   20.20
   7   3 -14  111.69   11.30
  -7   3  14  128.19   16.00
  -7  -3 -14  109.89   14.80
  -7   3  14  116.39   17.60
   7  -3 -14  133.49   12.20
  -7  -3  14  126.69   16.70
  -7  -3  14  144.19   15.70
  -7   3 -14  137.89   23.50
  -8  -3 -14  138.49   14.80
  -8   3  14  179.38   26.50
   8   3 -14  140.79   10.60
  -8  -3  14  172.08   16.50
  -8   3 -14  135.69   23.10
  -8  -3  14  160.98   14.40
   8  -3 -14  154.98   10.50
   0   4 -14   -6.10   16.60
   0   4  14    0.30   12.80
  -1   4  14  229.78   23.60
   1   4 -14  218.88   26.50
  -1   4 -14  186.68   24.40
   1   4  14  223.78   22.40
   2  -4  14  196.18   25.70
   2   4 -14  248.08   31.70
  -2   4  14  283.47   24.30
   2   4  14  239.08   22.30
  -2   4 -14  199.18   24.40
  -3  -4 -14  287.87   13.20
   3  -4  14  315.57   28.10
   3   4 -14  268.27   21.20
   3   4 -14  273.27   34.40
  -3  -4 -14  273.67   13.40
  -3   4  14  279.17   26.90
  -3  -4  14  253.77   16.90
   3  -4 -14  256.87   10.30
  -3   4 -14  246.08   19.20
   3  -4 -14  276.97   12.20
   4   4 -14  136.29   11.20
   4   4 -14  117.99   26.30
  -4  -4 -14  161.58   14.90
   4   4 -14  143.49   22.30
  -4  -4 -14  138.89   12.60
  -4  -4  14  139.39   21.60
  -4   4 -14  139.49   19.10
   4  -4 -14  127.29   10.90
   4  -4 -14  116.39    9.40
  -5  -4 -14  297.77   16.80
   5   4 -14  281.77   15.30
  -5  -4 -14  292.77   18.10
   5  -4 -14  293.57   13.90
  -5   4 -14  332.67   23.40
  -5  -4  14  327.27   22.60
  -6   4  14   39.70   18.50
  -6  -4 -14   16.10   12.00
   6   4 -14   35.70    8.90
  -6  -4 -14   39.40   10.70
  -6  -4  14   32.50   14.20
  -6   4 -14   15.50   13.40
   6  -4 -14   27.70    7.20
   7   4 -14  117.59   11.40
  -7   4  14  107.49   17.80
  -7  -4 -14  137.09   14.50
  -7  -4 -14  137.19   15.90
   7  -4 -14  101.29   10.60
  -7  -4  14  128.19   20.00
  -7   4 -14  111.79   15.60
   8   4 -14   19.70    5.60
  -8  -4 -14   27.80    7.20
  -8   4  14   36.80   15.10
  -8  -4  14   18.80    9.50
   8  -4 -14   17.80    5.00
  -8   4 -14   17.60   11.20
   0   5  14  156.08   23.20
   0   5 -14  134.39   17.20
   0   5 -14  161.08   21.30
   0   5 -14  136.89   27.10
   0  -5 -14  129.79   10.10
   1   5 -14  298.27   22.10
  -1  -5 -14  351.96   12.60
   1   5 -14  339.87   18.20
   1   5 -14  368.16   36.40
  -1   5  14  364.06   29.60
   1  -5 -14  337.97   12.50
  -1   5 -14  287.77   30.50
   1   5  14  335.67   26.20
   1  -5 -14  347.97   12.60
  -1   5 -14  353.86   19.90
   2   5 -14  175.38   28.90
  -2   5  14  125.89   22.10
   2   5 -14  142.89   15.90
   2   5 -14  193.38   20.70
  -2   5 -14  165.18   28.00
   2   5  14  146.79   23.80
  -2   5 -14  149.49   17.20
   2  -5 -14  137.29   11.20
   2  -5 -14  152.28   10.20
   3   5 -14  243.18   22.50
  -3  -5 -14  233.08   14.80
   3   5 -14  203.18   35.90
  -3  -5 -14  245.38   15.90
   3  -5 -14  258.07   11.50
   3  -5 -14  231.88   12.80
  -3   5 -14  204.98   16.20
  -3  -5  14  247.38   19.40
  -4  -5 -14  401.16   17.20
   4   5 -14  440.56   17.00
  -4  -5 -14  390.36   19.60
   4   5 -14  444.36   29.50
   4  -5 -14  403.76   13.80
  -4  -5  14  411.66   22.30
   4  -5 -14  412.36   14.60
   5   5 -14   48.70    8.70
   5   5 -14   31.50   16.80
  -5   5  14   51.69   17.00
  -5  -5 -14   48.40   10.70
  -5  -5 -14   41.00   11.40
   5  -5 -14   52.59    8.10
  -5   5 -14   66.09   15.20
  -5  -5  14   65.09   13.80
   6   5 -14   59.09    9.80
  -6  -5 -14   41.70   12.20
  -6   5  14   27.00   16.10
  -6  -5 -14   33.80   11.40
  -6  -5  14   15.30   13.10
  -6   5 -14   33.40   14.30
   6  -5 -14   37.00    7.70
  -7  -5 -14   99.59   16.00
  -7  -5 -14  124.49   12.80
  -7   5  14   88.49   16.40
   7   5 -14  107.19   10.40
  -7  -5  14  104.59   14.80
  -7   5 -14  101.99   13.30
   7  -5 -14  120.79    8.90
   0  -6 -14   45.50    7.80
   0  -6 -14   54.69    8.10
   0   6 -14   55.29   12.30
   0   6 -14   62.99   16.20
   0   6 -14   68.19   27.90
  -1  -6 -14  225.78   13.30
   1   6 -14  242.08   35.00
   1   6 -14  224.08   26.30
   1   6 -14  222.08   20.60
  -1   6 -14  167.78   20.10
   1  -6 -14  179.68   10.40
  -1   6 -14  145.39   21.80
   1  -6 -14  173.58   12.00
  -1   6 -14  147.89   32.00
  -2  -6 -14  736.53   20.70
   2   6 -14  696.63   34.00
   2   6 -14  741.33   26.70
   2   6 -14  749.62   43.60
  -2   6 -14  734.43   27.90
   2  -6 -14  784.82   21.40
   2  -6 -14  778.12   20.80
   3   6 -14  166.68   26.50
   3   6 -14  113.09   31.00
  -3   6 -14  102.89   18.20
   3   6  14  137.39   28.60
   3  -6 -14  112.89   12.60
   3  -6 -14  126.99   10.30
  -4   6  14  338.17   27.70
   4   6 -14  375.26   30.00
   4   6 -14  375.66   15.60
  -4  -6 -14  364.16   19.50
  -4  -6  14  378.56   22.80
   4  -6 -14  425.56   16.30
  -5   6  14  136.69   17.80
  -5  -6 -14  136.89   17.70
   5   6 -14  117.69   23.50
   5   6 -14  159.08   13.20
  -5  -6  14  162.38   19.60
   5  -6 -14  179.78   12.30
  -6   6  14   -0.80   14.50
   6   6 -14    9.10    7.90
   6  -6 -14    6.40    6.40
  -6  -6  14   11.40   11.50
   7   6 -14   18.10    5.60
  -7   6  14    5.40   12.40
   7  -6 -14   26.40    5.10
  -7  -6  14   21.10    8.00
   0   7 -14  447.36   41.00
   0   7  14  467.85   41.00
   0   7 -14  502.95   24.80
   0  -7 -14  518.65   17.80
   0   7 -14  426.36   28.50
  -1  -7 -14   38.80    8.80
   1   7 -14   28.80   14.10
   1   7 -14   30.10   24.20
   1   7 -14   30.90   18.30
  -1   7  14   59.39   24.70
  -1   7 -14   48.70   15.20
   1   7  14   64.89   26.30
  -1   7 -14   37.70   15.90
   1  -7 -14   55.39    8.40
  -1   7 -14   20.10   24.40
   2   7 -14   89.39   41.90
   2   7 -14   94.99   18.90
   2   7 -14  137.89   26.60
  -2  -7 -14  118.09   11.50
   2  -7 -14  118.19   12.30
   2  -7 -14  108.09   10.50
  -2   7 -14  106.19   20.60
   3   7 -14  149.29   28.30
   3  -7 -14  106.39   12.70
   3  -7 -14   99.69    9.70
  -3   7 -14   91.39   15.80
   4   7 -14  250.07   28.80
   4   7 -14  257.97   14.00
   4  -7 -14  279.27   14.10
   5   7 -14  -14.40   13.80
   5   7 -14   24.70    8.40
   5  -7 -14   21.10    6.80
   6   7 -14  133.19    9.50
  -6   7  14  127.49   16.80
   6  -7 -14  147.69    8.70
  -6  -7  14  115.19   12.30
   0   8 -14   47.10   14.90
   0   8 -14   53.19   17.50
   0  -8 -14   90.89   12.00
   1   8 -14   68.79   19.40
   1   8 -14   71.69   14.90
  -1  -8 -14   52.79    7.90
   1  -8 -14   82.49   11.60
  -1   8 -14   85.49   16.30
   2   8 -14  237.78   20.40
   2   8 -14  252.27   28.40
   2  -8 -14  249.78   13.00
  -2   8 -14  233.78   21.60
   3   8 -14   -3.10    7.60
   3   8 -14   13.10   18.70
  -3   8 -14   19.60   13.10
   3  -8 -14   10.50    6.50
   4   8 -14  125.19   23.60
   4   8 -14  192.18   10.90
   4  -8 -14  185.38   10.50
   5   8 -14  131.09    9.20
   5  -8 -14  159.48    8.60
   0   9 -14   -8.30   14.80
   0   9 -14   -6.20   13.40
   0  -9 -14    4.40    5.70
   1   9 -14   25.60   12.00
   1   9 -14   13.10   16.50
  -1   9 -14   21.90   13.40
   1  -9 -14   28.20    6.50
   2   9 -14   39.20    9.70
   2   9 -14   67.69   15.00
   2  -9 -14   83.59    8.70
  -2   9 -14   80.39   13.00
   3   9 -14    4.60    5.50
   3   9 -14   10.20   12.70
   3  -9 -14   12.70    4.90
  -3   9 -14   -9.60   10.10
   0   0  15    8.70   11.10
   0   0 -15  -11.70   14.00
   1   0  15  986.70   29.60
  -1   0 -15 1016.10   36.20
  -1   0  15  997.40   34.90
   1   0 -15  970.10   35.80
  -2   0 -15   -0.50   12.20
   2   0 -15   -9.90   13.50
   2   0  15    6.50   12.70
  -2   0  15    1.60   11.30
   3   0 -15  217.38   21.00
   3   0  15  207.88   22.70
  -3   0  15  238.68   22.30
   4   0  15   39.50   15.20
  -4   0  15   22.00   17.20
  -5   0 -15    5.30    8.60
   5   0 -15   27.50    6.30
  -5   0 -15    5.70   12.90
   5   0 -15   16.80    6.90
  -5   0  15   19.00   11.70
  -5   0  15   23.00    9.20
  -5   0 -15   29.60    8.70
  -6   0  15  136.99   16.20
   6   0 -15  124.49   11.50
  -6   0  15  121.39   18.80
  -6   0 -15  136.89   13.40
  -6   0 -15  147.79   21.60
   6   0 -15  131.19   11.10
  -7   0 -15   -0.60    8.30
  -7   0  15    9.00   11.10
   7   0 -15    9.10    7.80
  -7   0 -15   -2.30   15.20
  -8   0  15  108.59   17.60
  -8   0 -15  147.69   24.10
   8   0 -15  135.59   11.70
  -8   0 -15  119.49   13.50
  -9   0  15  135.49   10.80
   9   0 -15  160.58   10.30
   0   1 -15  633.44   30.00
   0  -1  15  597.14   24.80
   0   1  15  612.04   26.20
  -1   1  15  919.21   34.30
   1  -1  15  944.11   35.80
   1   1 -15  965.50   35.90
  -1  -1  15  834.22   32.70
   1   1  15  847.42   28.10
  -1   1 -15  899.21   34.20
  -2   1  15  157.18   20.10
   2  -1  15  210.38   24.80
   2   1 -15  175.68   20.20
  -2  -1  15  159.98   21.60
  -2   1 -15  171.68   20.20
   3  -1  15  716.63   33.00
   3   1 -15  722.03   33.00
  -3   1  15  763.62   32.60
  -3  -1  15  728.13   33.40
   3   1  15  715.33   34.60
  -4   1  15  151.28   22.40
   4  -1  15  171.58   25.10
  -4  -1  15  151.18   23.50
   4   1  15  165.88   25.60
  -5   1  15  276.17   16.00
  -5  -1 -15  279.17   14.90
  -5  -1 -15  275.77   16.70
   5   1 -15  282.27   13.00
  -5  -1 -15  285.47   20.30
   5  -1 -15  253.27   11.80
  -5  -1  15  266.17   17.40
  -5  -1  15  269.77   20.10
  -5   1 -15  282.77   20.20
   5   1  15  253.77   28.60
   5  -1 -15  249.28   12.20
  -6   1  15  103.39   14.30
  -6  -1 -15  105.89   13.90
  -6  -1 -15  105.89   17.00
  -6  -1 -15   85.59   14.30
  -6   1  15   89.19   17.10
   6   1 -15  108.19   11.60
  -6  -1  15   69.19   13.50
  -6  -1  15   87.09   11.50
  -6   1 -15   91.69   15.80
   6  -1 -15   95.49   11.50
   6  -1 -15   94.39   12.80
  -7   1  15   36.30   11.90
  -7  -1 -15   28.90   15.50
  -7  -1 -15   46.80   10.00
   7   1 -15   31.00    8.00
  -7   1  15   49.30   16.60
  -7   1 -15   55.49   15.80
   7  -1 -15   40.80    7.90
  -7  -1  15   45.20   12.20
  -7  -1  15   43.90   12.10
   8   1 -15    2.50    7.10
  -8   1  15    4.10   10.30
  -8  -1 -15   16.40    8.60
   8  -1 -15   -2.80    6.60
  -8  -1  15   -2.60   10.20
  -8   1 -15    0.70   16.30
  -9  -1  15    1.40    7.20
   0  -2  15  354.46   21.40
   0   2  15  386.26   21.80
   0  -2  15  332.27   21.30
   0   2 -15  353.26   25.20
   1  -2  15  502.25   27.30
   1   2 -15  496.45   28.40
  -1   2  15  510.45   26.30
  -1  -2  15  473.75   26.40
  -1   2 -15  492.65   27.40
   1   2  15  526.35   23.70
  -1  -2  15  515.45   21.90
   2  -2  15  358.36   24.10
   2   2 -15  312.07   25.90
  -2   2  15  346.57   25.10
  -2   2 -15  334.07   25.50
  -2  -2  15  325.37   23.90
   2   2  15  306.97   17.90
   3   2 -15   29.20   16.30
  -3   2  15   53.29   15.80
   3  -2  15   53.59   15.70
  -3  -2  15   50.39   16.50
   3   2  15   39.30   13.70
   4   2 -15   24.50    6.50
   4  -2  15    0.90   14.80
  -4  -2 -15   15.00    8.80
  -4   2  15   19.30   14.50
  -4  -2 -15   19.70    7.60
  -4  -2  15   13.80   15.80
  -4   2 -15   15.60   12.40
   4   2  15   18.70   13.00
  -4  -2  15   20.30   10.60
   4  -2 -15   18.90    6.50
  -5  -2 -15  120.29   15.00
  -5   2  15  142.99   14.40
   5   2 -15  164.18   12.50
  -5  -2 -15  135.09   11.90
  -5  -2 -15  142.79   14.90
   5  -2 -15  137.69   10.90
   5  -2 -15  148.79   10.20
  -5   2 -15  123.99   20.50
  -5  -2  15  147.99   13.90
  -5  -2  15  172.98   19.90
  -6  -2 -15   97.79   16.40
   6   2 -15   92.59   11.50
  -6   2  15   78.99   12.50
  -6  -2 -15   97.09   13.20
  -6   2  15   98.69   18.50
  -6  -2  15   78.79   14.20
  -6  -2  15   69.49   11.80
  -6   2 -15   55.99   14.50
   6  -2 -15   64.39   11.00
  -7   2  15   25.90   16.70
  -7  -2 -15   15.60    9.40
  -7   2  15   27.90   11.80
  -7  -2 -15   22.30   11.40
   7   2 -15    7.30    7.10
   7  -2 -15   22.00    8.00
  -7  -2  15   10.70   10.70
  -7   2 -15   27.00   16.00
  -7  -2  15   19.10   12.80
   8   2 -15  216.88   11.50
  -8   2  15  206.28   17.00
  -8  -2 -15  207.28   13.30
  -8   2  15  202.38   25.30
  -8  -2  15  174.88   15.80
   8  -2 -15  228.78   11.40
  -8   2 -15  223.98   25.60
  -8  -2  15  202.78   17.70
   0   3  15 4534.55  108.69
   0   3 -15 4779.52  112.29
   1  -3  15  158.98   20.70
   1   3 -15  191.48   25.50
  -1   3  15  195.48   20.60
   1   3  15  137.19   18.20
  -1   3 -15  147.09   23.30
  -2   3  15  321.87   25.50
   2  -3  15  294.87   23.90
   2   3 -15  328.27   28.00
  -2   3 -15  274.07   27.40
   2   3  15  340.97   21.10
   3  -3  15  454.85   29.30
  -3   3  15  436.06   32.40
   3   3 -15  439.06   32.90
   3   3  15  324.87   24.00
  -4  -3 -15  195.68   13.60
  -4  -3 -15  154.18   14.50
   4  -3  15  164.48   25.90
   4   3 -15  192.28   11.00
  -4   3  15  171.58   26.70
   4   3 -15  168.98   20.70
  -4  -3  15  203.38   19.30
  -4   3 -15  207.78   19.90
   4  -3 -15  173.88   11.40
   4  -3 -15  192.78   10.80
  -5   3  15   60.29   11.30
  -5  -3 -15   98.39   15.20
  -5  -3 -15   70.49    9.70
   5   3 -15   82.39   12.00
  -5  -3  15   83.49   15.20
   5  -3 -15   69.19   10.60
  -5   3 -15   60.79   14.90
   5  -3 -15   63.49    8.90
  -5  -3  15   78.69   10.40
  -6  -3 -15  176.88   18.40
  -6   3  15  134.09   16.10
  -6   3  15  138.29   18.90
  -6  -3 -15  163.48   14.00
   6   3 -15  149.39   12.60
  -6  -3  15  176.68   21.50
   6  -3 -15  186.58   12.90
  -6   3 -15  128.09   23.20
  -6  -3  15  180.88   16.50
   7   3 -15   49.00    7.60
  -7   3  15   46.90   10.30
  -7  -3 -15   33.70   10.30
  -7  -3 -15   50.09   12.00
  -7   3  15   50.29   17.50
   7  -3 -15   71.59   11.20
  -7  -3  15   15.70   13.50
  -7   3 -15   57.89   15.80
  -7  -3  15   52.99   10.50
  -8   3  15   40.10   16.10
  -8  -3 -15   58.69    9.40
   8   3 -15   47.00    6.90
   8  -3 -15   39.80    6.10
  -8  -3  15   36.60    8.80
  -8  -3  15   33.40    9.90
  -8   3 -15   32.00   12.90
   0   4 -15   -2.60   17.20
   0   4  15    1.60   13.20
  -1   4  15   44.00   16.30
   1   4 -15   66.09   20.70
  -1   4 -15   68.59   21.40
   1   4  15   63.29   15.10
   2   4 -15  546.55   37.80
  -2   4  15  615.34   31.30
   2  -4  15  540.75   32.00
   2   4  15  649.24   30.30
  -2   4 -15  613.74   34.00
   3   4 -15  237.98   11.40
   3   4 -15  249.97   25.70
  -3  -4 -15  231.18   13.80
  -3   4  15  247.28   28.60
  -3  -4 -15  251.17   15.20
   3  -4  15  264.97   29.50
   3   4 -15  224.98   30.80
  -3  -4  15  279.57   17.90
   3  -4 -15  300.67   12.40
  -3   4 -15  250.97   17.00
   3  -4 -15  308.77   29.70
   3  -4 -15  280.17   11.60
  -4  -4 -15   36.70    9.70
   4   4 -15   27.20   25.00
   4   4 -15   54.49    9.50
  -4  -4 -15   39.90    9.60
   4   4 -15   28.40   17.20
  -4   4 -15   43.50   12.40
   4  -4 -15   48.00    6.80
   4  -4 -15   45.50    6.70
  -4  -4  15   39.40   13.70
  -5  -4 -15  181.68   17.90
  -5  -4 -15  163.28   14.00
   5   4 -15  170.78   13.60
  -5  -4  15  154.18   20.90
  -5   4 -15  183.18   21.40
   5  -4 -15  145.89   11.60
  -6  -4 -15   45.20   10.30
   6   4 -15   63.49    9.40
  -6   4  15   36.70   18.40
  -6  -4 -15   42.60   12.20
   6  -4 -15   65.89    8.10
  -6   4 -15   56.89   15.60
  -6  -4  15   45.50   14.40
   7   4 -15   19.50    7.70
  -7   4  15   35.60   16.10
  -7  -4 -15   36.80   11.40
  -7  -4 -15   20.80    9.90
   7  -4 -15   40.00    7.00
  -7   4 -15   34.50   14.30
  -7  -4  15   33.60   12.90
   8   4 -15  351.76   14.00
  -8  -4 -15  338.77   13.90
  -8   4  15  296.27   22.10
  -8   4 -15  255.27   19.80
  -8  -4  15  299.77   15.40
   8  -4 -15  285.17    9.70
   0   5 -15    8.60   14.60
   0   5 -15   41.20   12.70
   0  -5 -15   29.50    6.50
   0   5  15   21.40   14.70
   0   5 -15   42.80   20.40
  -1   5  15  316.47   29.20
   1   5 -15  353.26   31.20
  -1  -5 -15  338.27   12.70
   1   5 -15  390.86   23.10
   1   5 -15  353.56   18.30
   1  -5 -15  283.77   12.50
   1   5  15  313.37   27.90
   1  -5 -15  284.07   12.80
  -1   5 -15  356.36   33.50
  -1   5 -15  268.77   21.80
   1  -5 -15  319.87   19.40
  -1   5 -15  302.57   17.90
   2   5 -15   90.19   14.10
   2   5 -15  143.19   29.00
   2   5 -15   99.49   19.10
  -2   5 -15   67.09   23.90
  -2   5 -15   97.69   17.00
   2  -5 -15  102.79    9.30
   2  -5 -15  116.19    8.90
  -3  -5 -15  335.27   18.40
   3   5 -15  295.17   35.50
   3   5 -15  347.77   27.50
  -3  -5  15  291.77   20.90
   3  -5 -15  284.87   12.20
   3  -5 -15  293.17   11.40
  -3   5 -15  248.88   21.20
   4   5 -15   39.80   18.00
   4   5 -15   45.80    8.70
  -4  -5 -15   48.40   10.90
  -4  -5 -15   35.90    9.20
   4  -5 -15   31.50    6.40
   4  -5 -15   42.50    7.40
  -4  -5  15   39.40   13.10
  -5  -5 -15   92.39   10.50
  -5   5  15   91.19   17.80
   5   5 -15  122.99   12.60
   5   5 -15   85.69   18.20
  -5  -5 -15   98.09   12.60
   5  -5 -15   93.09   10.70
  -5  -5  15  124.59   19.70
  -5   5 -15   91.69   15.40
   6   5 -15   91.79   10.50
  -6   5  15   75.29   17.60
  -6  -5 -15   97.49   13.20
  -6  -5 -15  120.59   17.40
  -6   5 -15   99.99   13.80
  -6  -5  15  136.49   19.50
   6  -5 -15   80.49    9.90
   7   5 -15    3.00    6.80
  -7   5  15   -7.80   14.40
  -7   5 -15  -10.90   12.00
  -7  -5  15    7.80   10.60
   7  -5 -15    3.40    5.40
   0   6 -15  143.69   23.10
   0   6 -15  171.28   20.40
   0   6 -15  148.29   28.60
   0  -6 -15  144.79   11.70
   0  -6 -15  135.59   10.40
   1   6 -15  176.48   25.30
   1   6 -15  169.48   35.70
  -1  -6 -15  131.49   11.40
   1   6 -15  155.68   17.10
  -1   6 -15  137.19   22.10
  -1   6 -15  161.48   33.30
   1  -6 -15  135.79   11.30
   1  -6 -15  134.59   11.80
  -1   6 -15  173.98   20.60
   2   6 -15  226.78   39.10
   2   6 -15  227.28   17.80
   2   6 -15  246.48   23.70
  -2  -6 -15  231.88   16.20
   2  -6 -15  245.98   12.20
   2  -6 -15  236.28   13.40
  -2   6 -15  250.07   20.80
   3   6 -15  148.69   21.90
   3   6 -15   83.29   28.10
   3  -6 -15  143.39   12.10
   3  -6 -15  133.99   10.50
  -3   6 -15  116.69   21.10
   3   6  15  125.49   24.50
   4   6 -15   -9.50   17.50
   4   6 -15   17.00    9.40
  -4   6  15    6.70   15.90
  -4  -6  15   13.70   12.10
   4  -6 -15    6.80    5.90
   4  -6 -15    7.90    7.60
   5   6 -15   82.09   17.60
   5   6 -15  119.99   13.60
  -5   6  15   98.49   16.70
   5  -6 -15  108.09   11.20
  -5  -6  15   92.19   12.80
   6   6 -15  184.08   12.00
  -6   6  15  148.49   22.70
  -6  -6  15  155.78   17.50
   6  -6 -15  159.58   10.20
   7   6 -15   64.89    9.50
  -7   6  15   56.39   12.40
   7  -6 -15   50.99    6.50
  -7  -6  15   48.40    7.90
   0   7 -15  265.47   38.80
   0   7 -15  277.47   25.90
   0   7  15  272.27   34.90
   0  -7 -15  288.17   14.30
   0   7 -15  281.97   23.90
   1   7 -15  257.47   21.90
   1   7 -15  249.88   27.70
  -1   7  15  277.07   31.10
  -1  -7 -15  276.37   13.50
   1   7 -15  207.18   39.50
   1  -7 -15  249.38   13.20
  -1   7 -15  199.48   32.20
  -1   7 -15  192.98   24.90
  -1   7 -15  259.77   24.00
   1   7  15  255.67   36.00
  -2  -7 -15  221.18   14.00
   2   7 -15  252.17   29.00
   2   7 -15  213.18   22.80
   2  -7 -15  230.38   12.50
  -2   7 -15  248.68   22.50
   2  -7 -15  251.47   13.90
   3   7 -15   53.79    8.90
   3   7 -15   73.69   22.00
  -3   7 -15   94.19   15.40
   3  -7 -15   97.39    9.60
   3  -7 -15   97.99   12.40
   4   7 -15   94.39   19.10
   4   7 -15  113.79   12.20
   4  -7 -15   99.89   11.00
   5   7 -15   92.29   16.00
   5   7 -15  160.38   12.00
  -5   7  15  126.39   22.60
   5  -7 -15  131.09   10.80
   6   7 -15   20.50    5.90
   6  -7 -15   23.00    5.40
   0   8 -15   51.79   17.20
   0  -8 -15   79.89   11.60
   0   8 -15   98.39   17.10
  -1  -8 -15  109.29   10.70
   1   8 -15   89.99   19.00
   1   8 -15   74.89   15.40
   1  -8 -15   97.59   11.60
  -1   8 -15  153.98   24.40
   2   8 -15   82.49   20.70
   2   8 -15   55.49    8.10
   2   8 -15   55.59   13.90
   2  -8 -15   58.89   10.20
  -2   8 -15   58.89   15.80
   3   8 -15   81.59   17.70
   3   8 -15  102.49   10.30
   3  -8 -15   94.29   10.10
  -3   8 -15   80.59   15.70
   4   8 -15   64.19   14.40
   4   8 -15   88.89   10.70
   4  -8 -15   94.39    9.40
   5   8 -15   86.49    9.20
   5  -8 -15   84.19    7.00
   0   9 -15  111.19   21.40
   0  -9 -15  141.19    9.00
   0   9 -15  152.18   19.50
   1   9 -15   29.60   14.70
   1   9 -15   45.00   12.20
  -1   9 -15   67.79   13.90
   1  -9 -15   89.59    8.20
   2   9 -15   71.69   10.70
   2   9 -15  117.49   22.70
   2  -9 -15  125.89    9.40
  -2   9 -15  144.49   17.00
   3   9 -15   35.60   12.80
   3  -9 -15   72.19    7.40
   0   0 -16  267.87   26.10
   0   0  16  206.78   19.30
   1   0  16  222.78   16.90
   1   0 -16  189.78   21.40
  -1   0  16  150.78   18.70
  -1   0 -16  164.28   20.10
   2   0  16  622.74   29.60
   2   0 -16  580.34   29.90
  -2   0  16  570.84   28.10
   3   0  16 1177.68   44.30
   3   0 -16 1138.49   40.20
  -3   0  16 1167.98   42.80
   4   0  16  190.18   27.50
  -4   0  16  247.48   26.10
  -5   0 -16  138.29   12.20
  -5   0  16  115.49   16.60
  -5   0 -16  107.79   16.80
  -5   0  16  125.49   13.70
   5   0 -16  135.89   10.70
   5   0 -16  129.09    9.30
   6   0 -16  262.67   13.00
   6   0 -16  271.07   13.30
  -6   0  16  253.67   19.30
  -6   0  16  296.17   21.10
  -6   0 -16  264.97   15.30
  -6   0 -16  272.07   22.70
  -7   0 -16  152.58   14.50
  -7   0 -16  185.18   23.60
   7   0 -16  186.78   13.90
  -7   0  16  181.78   17.80
   8   0 -16    5.80    6.50
  -8   0  16    4.80   10.30
  -8   0 -16   22.70   15.10
   0   1 -16  701.63   31.40
   0  -1  16  814.32   29.00
   0   1  16  730.93   27.50
   1   1 -16  581.84   28.60
   1  -1  16  562.44   27.50
  -1   1  16  518.05   27.30
  -1  -1  16  457.55   24.70
  -1   1 -16  531.85   26.90
   1   1  16  515.05   23.10
  -2   1  16   71.79   15.60
   2   1 -16   69.59   16.70
   2  -1  16   63.49   14.80
  -2   1 -16   75.79   16.40
  -2  -1  16   67.29   14.70
   3   1 -16  858.61   35.60
   3  -1  16  875.41   37.50
  -3   1  16  906.01   36.70
   3   1  16  868.01   38.70
  -3  -1  16  892.71   36.80
  -4   1  16  225.38   27.20
  -4  -1 -16  207.38   19.80
   4  -1  16  262.97   30.80
   4   1 -16  244.08   12.00
  -4  -1 -16  244.58   16.20
  -4  -1  16  244.28   20.90
  -4  -1  16  286.37   15.60
  -4   1 -16  223.28   19.60
   4   1  16  234.68   25.30
  -4  -1  16  218.18   25.50
  -5  -1 -16 1005.40   26.10
  -5  -1 -16 1045.70   28.80
   5   1 -16 1034.30   25.90
  -5  -1 -16 1010.20   31.50
  -5   1  16 1040.00   29.70
   5  -1 -16  987.20   26.10
  -5   1 -16 1019.40   31.10
  -5  -1  16 1054.29   28.40
   5  -1 -16 1011.50   25.10
  -5  -1  16 1078.09   32.50
   6   1 -16   96.49   11.70
  -6  -1 -16  104.19   15.80
  -6   1  16   86.89   13.10
  -6  -1 -16  115.99   16.20
   6   1 -16   85.89   11.00
  -6   1  16   94.99   17.60
  -6  -1 -16   80.19    9.80
   6  -1 -16   79.69   10.60
   6  -1 -16   78.49   10.90
  -6   1 -16   69.99   15.00
  -6  -1  16   96.19   13.10
  -6  -1  16   82.09   13.80
   7   1 -16   24.60    7.90
  -7   1  16   16.90   11.10
  -7   1  16   20.00   16.10
  -7  -1 -16   13.20   15.50
   7   1 -16   11.70    6.90
  -7  -1 -16   12.40    9.20
   7  -1 -16   31.00    7.80
  -7   1 -16   42.40   15.70
  -7  -1  16   22.50   12.10
  -7  -1  16   40.40   12.00
  -8   1  16   42.40   10.70
  -8  -1 -16   23.20    8.20
   8   1 -16   22.40    6.70
  -8  -1  16   12.60   10.00
  -8   1 -16   30.50   14.40
   8  -1 -16   25.40    6.70
   0   2 -16   42.90   16.40
   0  -2  16   10.40   10.90
   0  -2  16   18.00   11.20
   0   2  16   45.00   13.60
  -1   2  16  148.59   22.80
   1   2 -16  182.88   23.70
   1  -2  16  172.98   22.20
   1   2  16  178.08   17.70
  -1   2 -16  131.59   21.40
  -1  -2  16  150.08   20.80
   2   2 -16   98.79   21.10
  -2   2  16   91.39   18.60
   2  -2  16   80.19   14.90
  -2  -2  16  114.69   19.80
  -2   2 -16  116.79   18.90
   2   2  16  104.89   15.20
   3  -2  16  342.47   30.00
  -3   2  16  366.66   29.60
   3   2 -16  328.27   28.80
   3   2  16  473.65   30.40
  -3  -2  16  458.95   30.90
  -4  -2 -16  231.58   15.70
   4  -2  16  219.58   29.70
   4   2 -16  233.68   12.30
   4   2 -16  190.18   30.50
  -4  -2 -16  233.58   12.10
  -4   2  16  252.27   24.70
  -4   2 -16  211.48   20.40
   4  -2 -16  225.68   10.80
  -4  -2  16  225.38   14.70
   4  -2 -16  227.78   11.30
  -4  -2  16  224.78   26.80
  -4  -2  16  230.88   17.30
   4   2  16  236.38   23.50
  -5  -2 -16    0.50    9.70
   5   2 -16   -3.80    7.70
  -5  -2 -16   -6.00    8.60
  -5   2  16   -4.20   10.40
   5  -2 -16    7.60    6.30
  -5   2 -16   18.10   14.00
  -5  -2  16   -3.90   12.60
   5  -2 -16   -0.90    6.60
  -5  -2  16    8.90    9.90
  -6   2  16  201.38   18.90
  -6  -2 -16  191.48   15.60
   6   2 -16  176.68   13.30
  -6   2  16  208.28   26.30
  -6  -2 -16  176.38   17.40
  -6   2 -16  203.38   25.80
  -6  -2  16  180.28   17.30
   6  -2 -16  178.88   12.30
  -6  -2  16  165.98   20.00
  -7  -2 -16  131.79   14.90
  -7  -2 -16  144.09   15.40
  -7   2  16  132.69   18.40
  -7   2  16  144.89   18.10
   7   2 -16  118.49   11.20
   7   2 -16  138.59   12.80
  -7   2 -16  144.59   23.30
  -7  -2  16  121.99   20.00
   7  -2 -16  141.69   12.20
  -7  -2  16  133.69   16.80
  -8  -2 -16    5.50    8.70
  -8   2  16    6.10    9.40
   8   2 -16    2.20    6.20
  -8   2  16    6.70   15.00
  -8   2 -16   13.20   14.20
  -8  -2  16    7.60    9.10
   8  -2 -16    3.20    6.10
  -8  -2  16   12.50   10.30
   0   3 -16   60.39   19.20
   0   3  16   59.99   14.00
   1  -3  16   69.59   14.70
   1   3 -16   85.89   20.90
  -1   3  16   85.79   16.10
  -1   3 -16   92.69   19.00
   1   3  16  131.69   19.20
   2  -3  16   55.49   16.00
   2   3 -16   95.29   22.60
  -2   3  16   92.49   18.70
  -2   3 -16   69.99   20.00
   2   3  16   75.79   12.60
  -3   3  16  223.48   27.30
   3   3 -16  228.18   10.80
  -3  -3 -16  236.08   15.50
   3  -3  16  246.38   25.40
  -3  -3 -16  247.48   13.60
   3   3 -16  220.48   26.40
  -3  -3  16  254.27   19.30
   3   3  16  198.28   23.90
   3  -3 -16  241.08   11.50
  -4  -3 -16  180.38   15.80
   4   3 -16  180.28   10.80
   4   3 -16  146.59   18.60
  -4  -3 -16  172.38   12.60
   4  -3 -16  172.78   10.00
   4  -3 -16  171.78    9.80
  -4   3 -16  135.39   20.20
  -4  -3  16  163.08   19.30
  -5  -3 -16  112.59   15.10
   5   3 -16  130.29   13.20
  -5  -3 -16  120.99   17.20
  -5   3  16  120.89   16.30
  -5  -3  16   84.29   10.60
   5  -3 -16   87.99   11.00
  -5  -3  16  102.69   15.80
  -5   3 -16  103.79   15.40
   5  -3 -16   85.09    9.40
  -6  -3 -16  232.68   16.80
  -6   3  16  222.78   18.80
  -6  -3 -16  205.28   19.30
   6   3 -16  215.88   13.70
  -6   3  16  210.88   29.20
  -6  -3  16  230.18   17.60
  -6   3 -16  222.18   25.60
  -6  -3  16  236.48   22.20
   6  -3 -16  216.08   13.40
  -7  -3 -16  239.98   19.80
   7   3 -16  185.28   12.50
  -7   3  16  238.18   26.90
  -7   3  16  248.18   17.30
  -7  -3 -16  247.58   15.60
  -7  -3  16  258.77   21.00
  -7   3 -16  252.87   23.20
   7  -3 -16  230.18   12.30
  -7  -3  16  245.28   16.60
  -8   3  16   38.40   15.10
   8   3 -16   31.70    5.60
  -8  -3 -16   26.90    7.60
   8  -3 -16   23.20    5.20
  -8  -3  16   35.60    9.30
  -8   3 -16   43.40   14.00
  -8  -3  16   51.79    8.30
   0   4 -16  202.88   26.90
   0   4  16  165.08   21.30
   1   4 -16   15.20   19.20
  -1   4  16   15.00   13.40
   1   4  16   40.70   13.90
  -1   4 -16   39.40   21.40
  -2   4  16  237.68   25.70
   2  -4  16  269.07   26.60
   2   4 -16  251.57   30.80
   2   4 -16  265.17   20.30
   2   4 -16  232.28   10.70
   2  -4 -16  264.87   23.10
   2  -4 -16  254.87   11.00
   2   4  16  300.17   23.70
  -2   4 -16  255.67   18.30
  -2   4 -16  218.78   28.20
  -3  -4 -16   94.09   13.20
   3   4 -16  129.39   20.70
   3   4 -16   92.89   25.90
   3   4 -16  118.09   11.30
  -3  -4 -16  101.99   14.20
   3  -4  16   84.39   20.40
   3  -4 -16  105.49   17.00
   3  -4 -16  140.79   10.00
   3  -4 -16  129.19    9.80
  -3  -4  16  125.39   14.30
  -3   4 -16   94.19   17.10
   4   4 -16  336.37   13.90
  -4  -4 -16  342.07   16.90
  -4  -4 -16  317.67   18.80
   4   4 -16  323.17   26.40
   4   4 -16  261.97   40.10
  -4  -4  16  328.07   22.50
   4  -4 -16  310.07   12.40
  -4   4 -16  319.27   22.20
   4  -4 -16  311.07   13.20
  -5  -4 -16   48.10   12.00
  -5   4  16   30.80   10.30
  -5  -4 -16   32.20   10.30
   5   4 -16   39.80    9.40
   5  -4 -16   28.70    6.50
  -5  -4  16   14.30   13.20
   5  -4 -16   19.80    6.50
  -5   4 -16   29.40   14.40
  -6  -4 -16  210.68   19.40
   6   4 -16  205.78   13.70
  -6  -4 -16  196.98   15.60
  -6   4  16  175.18   28.30
  -6   4 -16  163.58   23.30
   6  -4 -16  154.08   11.50
  -6  -4  16  161.68   22.00
  -7  -4 -16   91.39   14.30
  -7   4  16   80.99   16.20
   7   4 -16  102.99   10.60
  -7  -4  16  126.99   18.90
  -7   4 -16  106.29   14.30
   7  -4 -16  116.79   10.30
  -8   4  16   89.19   14.10
   8  -4 -16   53.79    6.10
  -8   4 -16   45.70   11.10
  -8  -4  16   47.30    8.90
   0   5  16  259.37   36.10
   0   5 -16  215.68   18.90
   0   5 -16  280.27   31.10
   0  -5 -16  215.18   11.50
   0   5 -16  213.18   22.80
   1   5 -16   75.69   14.80
  -1  -5 -16   62.89    8.70
   1   5 -16   96.39   19.20
   1   5 -16   63.29   23.90
   1  -5 -16   98.39   16.20
  -1   5 -16   81.99   15.00
  -1   5 -16   75.89   23.80
   1  -5 -16   62.59    9.60
  -1   5 -16   59.99   12.00
   1  -5 -16   63.69    7.60
   2   5 -16  146.49   23.30
   2   5 -16  129.29   26.40
   2   5 -16  108.29   16.60
   2  -5 -16  126.49   11.20
  -2   5 -16  159.58   28.30
  -2   5 -16  130.89   16.00
   2  -5 -16  158.18   19.70
   2  -5 -16  140.69    9.50
   3   5 -16  235.08   25.10
   3   5 -16  218.38   12.20
  -3  -5 -16  185.48   16.10
   3   5 -16  191.68   39.50
  -3  -5  16  218.18   21.40
   3  -5 -16  231.28   11.50
   3  -5 -16  236.08   12.30
  -3   5 -16  217.88   19.80
  -4  -5 -16   36.10   11.20
   4   5 -16   35.00    9.10
   4   5 -16   16.00   18.20
   4  -5 -16   33.90    6.70
   4  -5 -16   26.60    7.10
  -4  -5  16   52.99   13.40
  -5  -5 -16  346.97   16.90
  -5  -5 -16  337.27   21.20
  -5   5  16  334.57   29.60
   5   5 -16  304.17   28.50
   5   5 -16  354.26   15.60
   5  -5 -16  295.67   12.90
  -5   5 -16  287.87   22.20
  -5  -5  16  203.78   22.30
   6   5 -16    3.70    8.80
  -6  -5 -16   21.30   10.10
  -6  -5 -16   15.90   11.00
  -6   5  16   14.90   16.30
  -6  -5  16   -0.40   12.20
  -6   5 -16    5.00   12.70
   6  -5 -16   14.80    6.30
  -7   5  16   33.70   14.90
   7   5 -16   20.10    6.40
   7  -5 -16   42.00    7.50
  -7  -5  16   29.60   10.70
  -7   5 -16   -1.40   11.80
   0  -6 -16  140.39   11.10
   0   6 -16  165.48   24.60
   0   6 -16  140.29   27.90
   0   6 -16  149.99   20.80
   0  -6 -16  164.38   12.20
   1   6 -16  197.38   18.00
   1   6 -16  190.38   34.00
   1   6 -16  172.08   22.90
   1  -6 -16  163.38   10.60
  -1   6 -16  133.59   21.90
   1  -6 -16  184.68   12.10
  -1   6 -16  178.48   19.00
  -1   6 -16  119.79   27.80
   2   6 -16  254.97   28.00
   2   6 -16  249.08   22.40
   2   6 -16  186.18   38.50
  -2   6 -16  245.28   19.30
   2  -6 -16  236.08   12.30
   2  -6 -16  236.38   13.20
   3   6 -16  -55.89   27.20
   3   6 -16   39.80   20.00
   3   6 -16   33.50    9.50
   3  -6 -16   31.50    6.90
   3   6  16   53.89   27.70
  -3   6 -16   21.20   13.70
   3  -6 -16   31.10    7.60
  -4   6  16   44.60   17.10
   4   6 -16   68.89    9.60
   4   6 -16   60.79   19.60
   4  -6 -16   58.39    6.80
   4  -6 -16   45.60    8.00
  -4  -6  16   40.80   12.10
   5   6 -16   29.70   16.60
  -5   6  16   48.30   15.80
   5   6 -16   47.30    9.20
   5  -6 -16   38.50    7.20
  -5  -6  16   52.19   11.90
  -6   6  16   53.29   14.20
   6   6 -16   43.60    7.80
  -6  -6  16   58.59   11.00
   6  -6 -16   56.29    9.40
   0   7  16   27.80   23.60
   0   7 -16   12.90   17.00
   0  -7 -16   16.60    7.10
   0   7 -16  -12.80   25.70
   0   7 -16   24.20   15.00
   1   7 -16    1.50   17.10
   1   7 -16   10.10   13.90
  -1  -7 -16   -5.30    6.80
   1  -7 -16    4.00    7.50
   1  -7 -16    5.10    7.00
  -1   7 -16  -12.20   19.30
  -1   7 -16   17.00   13.90
   2   7 -16   80.89   21.70
   2   7 -16   57.99    8.70
   2   7 -16   46.60   14.70
  -2   7 -16   48.70   16.60
   2  -7 -16   47.40    7.50
   2  -7 -16   42.80    8.10
   3   7 -16    3.50    8.30
   3   7 -16   22.80   19.40
   3  -7 -16   10.30    6.20
  -3   7 -16    1.00   13.40
   3  -7 -16    8.60    6.80
   4   7 -16   19.40    8.40
   4   7 -16   24.90   17.20
   4  -7 -16   28.00    7.70
  -5   7  16   20.70   12.90
   5   7 -16   20.50    7.80
   5   7 -16    6.80   13.80
   5  -7 -16   17.10    6.40
   6   7 -16   57.59    8.10
   6  -7 -16   63.29    6.60
   0   8 -16   25.50   17.20
   0  -8 -16    7.40    7.10
   0   8 -16   23.00   16.50
   1   8 -16  210.88   22.40
   1   8 -16  211.88   30.50
  -1  -8 -16  196.98   10.50
   1  -8 -16  187.38   11.90
  -1   8 -16  266.27   25.80
   2   8 -16    5.90    7.00
   2   8 -16   34.60   18.20
   2   8 -16   15.60   11.90
  -2   8 -16   33.20   14.70
   2  -8 -16   29.70    6.80
   3   8 -16   41.00    7.60
   3   8 -16   63.99   17.90
   3  -8 -16   44.40    6.60
  -3   8 -16   37.10   11.30
   4   8 -16   22.90    6.60
   4   8 -16   13.00   14.10
   4  -8 -16   34.90    5.50
   0   9 -16   86.39   17.40
   0   9 -16   51.19   14.90
   0  -9 -16   49.40    7.60
   1   9 -16   16.30   13.80
   1   9 -16   27.70    9.90
   1  -9 -16   25.70    5.70
  -1   9 -16   40.90   11.80
   2   9 -16   24.10   13.50
   2   9 -16   -6.40    9.10
   2  -9 -16   26.90    5.20
  -2   9 -16   11.60    9.50
   3   9 -16   74.49   15.70
   0   0 -17    1.60   15.00
   0   0  17    7.30    9.80
   1   0  17 1430.36   39.30
   1   0 -17 1467.25   46.80
  -1   0 -17 1436.96   44.70
  -1   0  17 1407.36   43.00
   2   0 -17  531.35   28.20
   2   0  17  555.54   29.30
  -2   0  17  588.84   29.20
   3   0 -17   78.99   18.20
   3   0  17   51.69   16.80
  -3   0  17   79.79   17.50
  -4   0  17  232.28   28.20
   4   0  17  234.68   26.30
  -4   0 -17  240.58   16.80
  -4   0  17  235.08   23.90
   4   0 -17  243.18   11.20
  -5   0 -17   71.69   13.70
  -5   0  17   98.09   15.40
   5   0 -17   73.09   11.00
  -5   0  17   70.69   12.10
   5   0 -17  102.69    9.90
  -5   0 -17   80.99   11.60
  -6   0  17  361.56   21.50
  -6   0  17  368.66   18.70
  -6   0 -17  354.16   16.70
   6   0 -17  368.66   14.10
   6   0 -17  348.37   14.10
  -6   0 -17  375.56   24.20
  -7   0 -17  378.86   28.00
  -7   0  17  370.86   20.10
  -7   0 -17  341.97   16.20
   7   0 -17  364.16   15.10
  -8   0  17   -9.40    9.80
   8   0 -17    2.40    6.00
   0  -1  17  399.76   22.10
   0   1 -17  339.87   25.70
   0   1  17  389.46   23.50
   1   1 -17 1074.69   39.40
  -1   1  17 1058.49   37.30
   1  -1  17 1078.79   38.10
   1   1  17 1178.78   36.80
  -1   1 -17 1161.88   40.60
  -1  -1  17 1160.48   39.60
   2   1 -17    8.00   15.00
  -2   1  17   15.00   15.20
   2  -1  17   20.20   13.40
  -2   1 -17    4.40   13.30
  -2  -1  17   11.40   12.80
  -3   1  17   25.00   14.50
   3  -1  17   63.49   15.90
   3   1 -17   55.29   16.70
   3   1  17   25.10   13.80
  -3  -1  17   42.90   15.80
  -4   1  17   50.19   17.60
  -4  -1 -17   54.89    9.30
  -4  -1 -17   70.39    9.10
   4  -1  17   61.49   18.10
   4   1 -17   49.60    8.00
  -4  -1 -17   53.89   12.80
   4  -1 -17   44.10    6.30
  -4  -1  17   50.29   13.20
  -4   1 -17   41.00   11.10
  -4  -1  17   39.20   10.10
   4   1  17   48.70   17.70
  -4  -1  17   42.10   17.80
  -5   1  17  373.96   17.80
  -5  -1 -17  375.76   14.70
  -5  -1 -17  382.46   18.60
   5   1 -17  390.96   14.00
  -5  -1 -17  374.06   20.80
   5  -1 -17  337.77   13.50
  -5  -1  17  317.57   18.70
  -5  -1  17  340.37   19.30
  -5   1 -17  327.67   20.60
   5  -1 -17  341.47   12.70
  -6  -1 -17  127.79   22.20
  -6   1  17  160.98   24.60
  -6  -1 -17  124.29   14.00
   6   1 -17  139.99   11.60
   6   1 -17  156.38   11.50
  -6   1  17  149.79   19.20
  -6  -1  17  168.88   20.40
  -6  -1  17  110.39   15.70
   6  -1 -17  122.59   10.70
  -6   1 -17  143.59   23.80
   6  -1 -17  139.79   10.80
  -7  -1 -17  129.39   14.80
  -7   1  17  135.09   18.10
  -7   1  17  125.79   17.30
   7   1 -17  121.69   11.60
   7   1 -17  117.49   11.30
  -7  -1  17  128.59   19.80
   7  -1 -17  150.08   11.70
  -7   1 -17  170.18   24.10
  -7  -1  17  130.99   18.60
  -8  -1 -17   46.00    8.30
   8   1 -17   54.29    9.00
  -8   1  17   66.19   10.90
  -8  -1  17   32.20   10.10
   8  -1 -17   58.49    9.20
  -8   1 -17   57.39   15.20
   0  -2  17 2685.83   68.49
   0   2 -17 2664.03   72.49
   0   2  17 2767.22   70.19
   0  -2  17 2749.72   67.89
   1   2 -17  277.77   26.50
   1  -2  17  251.57   21.90
  -1   2  17  275.07   23.00
   1   2  17  292.77   20.40
  -1   2 -17  285.07   28.20
  -1  -2  17  270.87   23.30
   2  -2  17   62.19   15.90
  -2   2  17   47.90   16.40
   2   2 -17   71.69   19.30
  -2  -2  17   66.69   15.20
  -2   2 -17   47.50   17.20
   3  -2  17  246.58   25.90
  -3   2  17  200.58   26.80
   3   2 -17  210.78   26.50
  -3  -2  17  240.88   27.70
   3   2  17  239.28   26.70
   4   2 -17   90.59   10.90
   4   2 -17  110.79   15.50
   4  -2  17   84.29   19.20
  -4   2  17   56.09   18.20
  -4  -2 -17   81.59   12.30
  -4  -2 -17   90.99   14.90
   4  -2 -17   86.19    9.80
  -4  -2  17  109.99   13.50
  -4   2 -17  108.59   16.80
  -4  -2  17   94.09   19.90
   4   2  17   85.49   18.10
  -4  -2  17  112.29   19.20
  -5   2  17  247.38   16.20
  -5  -2 -17  237.78   17.90
   5   2 -17  240.28   13.60
  -5  -2 -17  229.38   15.50
  -5  -2  17  226.18   16.90
   5  -2 -17  244.38   12.30
  -5  -2  17  237.08   21.10
   5  -2 -17  252.47   11.80
  -5   2 -17  237.98   20.60
   6   2 -17   44.70    7.60
  -6  -2 -17   52.89    9.90
  -6  -2 -17   55.39   11.30
  -6   2  17   24.70   11.10
  -6   2  17   58.19   18.70
  -6  -2  17   55.99   13.50
   6  -2 -17   51.79    8.00
  -6   2 -17   72.19   15.90
  -6  -2  17   58.79   11.80
   6  -2 -17   64.19   10.00
  -7   2  17  318.27   19.30
  -7  -2 -17  297.27   17.00
   7   2 -17  288.77   13.70
  -7   2  17  311.17   25.60
   7   2 -17  304.77   13.70
  -7  -2  17  271.47   17.60
   7  -2 -17  278.77   13.50
  -7   2 -17  272.27   24.50
  -7  -2  17  282.37   20.10
   8   2 -17   27.80    6.00
  -8  -2 -17   28.10    7.40
  -8   2  17   18.70    9.70
  -8   2  17   23.40   14.40
   8  -2 -17   19.80    6.00
  -8   2 -17   26.60   14.90
  -8  -2  17   28.20    8.70
  -8  -2  17   19.40    9.70
   0   3  17   84.39   15.10
   0   3 -17   67.09   19.00
  -1   3  17 1084.59   40.60
   1   3 -17  991.50   41.60
   1  -3  17  956.30   36.40
  -1   3 -17 1133.59   44.00
   1   3  17 1228.88   40.50
  -2   3  17   65.99   17.00
   2  -3  17   70.79   15.20
   2   3 -17   69.79   20.20
  -2   3 -17   74.79   19.60
   2   3  17   71.19   12.70
   3   3 -17   75.59   15.80
  -3  -3 -17   67.99    9.00
   3   3 -17   61.69    9.20
  -3   3  17   63.19   17.90
   3   3 -17   62.69   22.90
  -3  -3 -17   64.39    9.70
   3  -3  17   55.49   18.30
   3   3  17   46.90   16.00
   3  -3 -17   66.39    8.40
  -3  -3  17   63.39   12.40
  -3   3 -17   61.09   10.80
   4   3 -17   65.79    8.30
  -4  -3 -17   47.20    9.60
   4   3 -17   65.79   16.40
  -4  -3 -17   52.89    9.70
   4   3 -17   78.39   32.60
  -4   3 -17   58.49   13.90
   4  -3 -17   56.99    9.40
  -4  -3  17   47.30   13.50
   4  -3 -17   55.39    7.40
  -5   3  17   83.49   12.10
  -5  -3 -17   77.49   11.40
  -5  -3 -17   64.99   10.10
   5   3 -17   89.09   12.70
  -5  -3  17   31.60   13.50
  -5  -3  17   91.69   11.00
  -5   3 -17   74.39   14.00
   5  -3 -17   63.99   10.50
   5  -3 -17   60.19    9.40
  -6  -3 -17   45.20   10.30
  -6   3  17   28.90   17.70
  -6  -3 -17   65.19   12.00
  -6   3  17   59.99   12.50
   6   3 -17   38.70    9.30
  -6  -3  17   46.80   14.60
  -6   3 -17   54.49   15.30
  -6  -3  17   55.59   10.60
   6  -3 -17   24.20    7.60
   7   3 -17  184.98   12.10
  -7   3  17  110.29   17.90
   7   3 -17  184.18   11.40
  -7   3  17  164.88   16.50
  -7  -3 -17  168.88   16.00
  -7  -3  17  121.39   20.30
   7  -3 -17  146.69   11.30
  -7   3 -17   94.59   16.20
  -7  -3  17  112.79   14.80
  -8  -3 -17   53.39    8.20
   8   3 -17   26.20    6.50
  -8   3  17   30.50   13.90
  -8  -3  17   35.60    7.30
   8  -3 -17   34.20    5.20
  -8  -3  17   24.60    8.60
  -8   3 -17   32.00   12.20
   0   4  17   93.29   18.80
   0   4 -17   82.19   22.50
   1   4 -17  380.66   25.10
   1   4 -17  369.26   33.10
  -1  -4 -17  395.06   19.40
  -1   4  17  386.26   27.30
   1  -4 -17  471.65   22.70
   1  -4 -17  459.35   14.30
  -1   4 -17  459.65   21.70
  -1   4 -17  462.95   35.90
  -2  -4 -17   51.49    6.50
   2   4 -17   33.00   11.10
   2   4 -17   55.29    8.50
   2  -4  17   52.59   18.90
   2   4 -17   65.89   24.10
   2   4 -17   66.19   15.70
  -2   4  17   54.29   17.00
   2  -4 -17   64.49    7.80
   2  -4 -17   40.10   11.20
  -2   4 -17   34.40   11.90
  -2   4 -17   43.30   18.60
   2   4  17   76.39   14.60
  -2  -4  17   56.39   12.00
  -3  -4 -17  149.88   14.40
   3   4 -17  110.59   25.80
   3   4 -17  135.39   10.40
   3   4 -17  127.29   23.90
  -3  -4 -17  116.59   15.70
   3  -4 -17  106.49    9.20
  -3   4 -17   83.89   12.90
   3  -4 -17  120.29    8.90
  -3  -4  17  133.49   14.40
   3  -4 -17   99.69   17.40
   4   4 -17  140.19   23.80
  -4  -4 -17  105.69   12.80
   4   4 -17  122.79   12.00
  -4  -4 -17  133.19   17.50
  -4  -4  17   82.49   14.40
   4  -4 -17  106.49    9.90
  -4   4 -17  107.19   14.00
   4  -4 -17  114.29   10.50
   5   4 -17   69.09   19.70
  -5  -4 -17  120.39   16.80
  -5  -4 -17  126.09   18.90
  -5   4  17   66.39   11.10
   5   4 -17  105.19   13.80
   5  -4 -17   84.09    9.20
   5  -4 -17   72.99   10.20
  -5  -4  17   86.29   15.40
  -5   4 -17   70.99   15.00
  -6  -4 -17  105.89   16.90
  -6  -4 -17  129.59   15.50
  -6   4  17   70.59   18.00
   6   4 -17   96.29   12.90
   6  -4 -17   88.59   10.50
  -6  -4  17   88.49   14.60
  -6   4 -17   69.29   15.20
  -7   4  17  171.78   23.50
   7   4 -17  200.78   11.40
  -7  -4 -17  210.38   13.80
  -7  -4  17  200.08   19.10
  -7   4 -17  156.38   21.60
   7  -4 -17  199.78   10.70
  -8   4  17   -5.60   13.80
  -8  -4  17   13.20    8.70
  -8   4 -17    4.70   11.70
   0  -5 -17    7.60   11.30
   0  -5 -17    8.20    6.90
   0   5 -17   -8.60   21.30
   0   5 -17    6.10   15.30
   0   5 -17    1.50   10.90
   1   5 -17  606.14   24.50
  -1  -5 -17  568.84   17.30
   1   5 -17  530.85   39.50
   1   5 -17  547.85   28.70
  -1   5 -17  407.26   20.50
  -1   5 -17  410.56   37.60
  -1   5 -17  363.46   23.90
   1  -5 -17  438.16   22.90
   1  -5 -17  413.86   13.70
   2   5 -17   53.09   13.50
   2   5 -17   39.10   25.00
   2   5 -17   69.99    8.70
   2   5 -17   50.09   16.00
   2  -5 -17   55.19    8.60
   2  -5 -17   69.29    9.80
   2  -5 -17   63.49   12.40
  -2   5 -17   64.19   14.80
   3   5 -17   37.40   17.60
   3   5 -17   33.70    8.60
   3   5 -17   22.70   24.10
  -3  -5  17   25.00   13.10
  -3   5 -17   30.50   12.30
   3  -5 -17   27.30    6.90
   3  -5 -17   30.30    7.00
   4   5 -17  306.67   15.20
   4   5 -17  273.37   27.50
  -4  -5 -17  282.97   18.50
  -4  -5  17  257.67   21.50
   4  -5 -17  262.17   13.00
   4  -5 -17  273.37   12.00
   5   5 -17   94.59   12.90
  -5   5  17   77.59   17.90
  -5  -5 -17  101.39   16.50
   5   5 -17   57.39   17.90
   5  -5 -17   53.99    7.50
  -5   5 -17   70.89   15.70
  -5  -5  17   92.99   14.50
  -6   5  17   27.40   16.30
   6   5 -17   11.90    8.20
  -6   5 -17   -1.70   13.50
   6  -5 -17   16.00    6.50
  -6  -5  17   13.70   12.00
  -7   5  17   31.10   13.60
   7   5 -17   20.30    6.00
  -7   5 -17   11.90   11.60
   7  -5 -17   14.90    5.10
  -7  -5  17   18.90    9.70
   0  -6 -17  549.45   17.80
   0   6 -17  542.05   29.00
   0   6 -17  470.75   39.90
   0   6 -17  534.45   24.50
   1   6 -17  248.38   36.40
   1   6 -17  329.17   28.40
   1   6 -17  326.67   22.00
   1  -6 -17  329.07   14.00
  -1   6 -17  188.88   35.90
  -1   6 -17  346.17   23.80
  -1   6 -17  270.67   24.30
   1  -6 -17  316.07   12.90
   2   6 -17   47.40   19.10
   2   6 -17   17.90    8.20
   2   6 -17   12.80   14.20
   2   6 -17   -2.80   26.90
   2  -6 -17   22.20    7.30
  -2   6 -17    6.60   15.80
   2  -6 -17   17.00    7.70
   3   6 -17   18.60   19.00
   3   6 -17   13.30    8.40
   3   6 -17  -53.29   22.30
  -3   6 -17    2.50   12.80
   3  -6 -17  -13.00    6.40
   3  -6 -17    2.60    7.20
   4   6 -17    0.40   17.60
   4   6 -17   21.70    8.70
   4  -6 -17    4.70    5.70
  -4  -6  17   13.80   11.40
   4  -6 -17   11.10    7.30
   5   6 -17    7.90   16.10
  -5   6  17    5.10   14.80
   5   6 -17   17.80    8.50
   5  -6 -17    9.50    6.80
  -5  -6  17   12.80   11.00
  -6   6  17   24.80   12.90
   6   6 -17   16.80    7.70
   6  -6 -17   12.40    5.60
  -6  -6  17   -0.30    9.80
   0   7 -17   85.39   19.90
   0   7 -17  119.19   24.30
   0  -7 -17  127.59   11.90
   1   7 -17   77.19   16.90
  -1  -7 -17   61.69   10.00
   1   7 -17   71.89   20.60
   1  -7 -17   42.40    7.90
   1  -7 -17   42.20    7.90
  -1   7 -17   46.50   18.90
   2   7 -17  122.49   22.20
   2   7 -17  117.09   20.70
   2   7 -17  134.19   12.00
   2  -7 -17  155.68   11.50
  -2   7 -17  170.48   23.50
   2  -7 -17  160.28   12.10
   3   7 -17   90.39   20.50
   3   7 -17   78.39   11.40
   3  -7 -17   76.89    9.80
  -3   7 -17   84.59   17.60
   3  -7 -17   86.89   11.00
   4   7 -17  233.18   12.50
   4   7 -17  168.18   25.60
   4  -7 -17  203.08   11.70
   5   7 -17    0.10    7.50
   5   7 -17  -18.50   12.70
  -5   7  17   -7.30   12.00
   5  -7 -17    7.40    5.60
   0   8 -17   29.90   16.20
   0   8 -17   77.09   17.20
   0  -8 -17   45.10    6.70
   1   8 -17  108.69   21.50
   1   8 -17   87.69   18.40
  -1  -8 -17   65.99   10.10
   1  -8 -17   50.39    7.50
  -1   8 -17  129.69   25.40
   2   8 -17  127.89   25.30
   2   8 -17   74.49   12.20
  -2   8 -17  100.29   21.00
   2  -8 -17   79.89    9.70
   3   8 -17   -0.20   15.30
   3   8 -17   -9.10    6.50
  -3   8 -17   -8.10    9.90
   3  -8 -17    1.10    5.60
   4   8 -17   14.10   13.10
   4   8 -17   31.40    6.40
   4  -8 -17   21.70    5.00
   0   9 -17    7.30   10.30
   0   9 -17   -5.70   12.50
   0  -9 -17  -12.40    4.80
   1   9 -17   12.00   14.00
   1   9 -17   35.30    9.80
   1  -9 -17   27.50    4.90
  -1   9 -17   26.10   11.30
   2   9 -17    1.10   12.10
   2  -9 -17   11.90    4.90
  -2   9 -17    0.90    8.80
   0   0  18  388.26   23.20
   0   0 -18  375.86   25.90
  -1   0  18   30.20   13.70
   1   0 -18   17.90   14.90
  -1   0 -18    7.90   14.90
   2   0 -18  623.64   31.00
   2   0  18  641.54   32.30
  -2   0  18  660.13   30.70
  -3   0  18    4.70   14.60
   3   0 -18   11.00   16.20
   3   0  18  -10.70   15.20
   4   0  18   35.50   16.50
  -4   0  18   30.80   11.40
   4   0 -18   55.19    7.30
  -4   0 -18   40.20    8.10
  -4   0 -18   31.10   12.70
  -4   0  18   45.40   16.90
  -5   0  18   28.60   11.00
  -5   0 -18    2.30   11.90
  -5   0  18   31.40   12.50
   5   0 -18   17.80    7.70
  -5   0 -18   16.20    8.40
   6   0 -18   57.09    8.10
  -6   0 -18  102.69   16.40
   6   0 -18   52.09    8.10
  -6   0  18   86.29   13.60
  -6   0 -18   71.19    9.70
  -6   0  18   75.69   12.30
  -7   0 -18   49.70    9.30
   7   0 -18   34.80    6.90
  -7   0 -18   35.50   16.10
  -7   0  18   59.89   11.50
   8   0 -18   38.90    6.00
  -8   0  18   26.20   10.00
   0  -1  18   34.80   11.70
   0   1  18   26.20   12.20
   0   1 -18   26.20   16.30
  -1   1  18  646.44   29.60
   1   1 -18  627.64   31.70
   1  -1  18  663.63   32.10
  -1  -1  18  687.63   31.70
  -1   1 -18  660.53   32.20
   1   1  18  693.23   27.90
   2  -1  18   12.10   15.20
  -2   1  18    6.30   13.30
   2   1 -18   21.10   15.80
  -2   1 -18   18.20   15.40
  -2  -1  18   -0.70   13.10
  -3   1  18  300.77   25.20
   3   1 -18  339.67   28.00
   3  -1  18  335.97   30.80
  -3  -1  18  253.87   25.00
   3   1  18  291.87   26.40
   4   1 -18  586.94   17.80
   4  -1  18  620.94   36.80
  -4  -1 -18  583.04   23.70
  -4   1  18  579.14   34.90
   4   1 -18  533.95   24.60
  -4  -1 -18  574.74   18.60
   4  -1 -18  530.25   15.80
  -4  -1  18  513.45   22.00
  -4  -1  18  518.25   35.40
  -4   1 -18  504.25   21.00
  -4  -1  18  501.15   18.80
   4   1  18  518.45   35.80
  -5  -1 -18  485.15   16.80
   5   1 -18  471.05   16.30
  -5  -1 -18  453.45   25.20
  -5   1  18  476.85   21.20
  -5  -1  18  538.95   24.10
  -5  -1  18  511.35   20.20
   5  -1 -18  510.55   16.50
  -5   1 -18  549.65   25.60
   6   1 -18   67.19    9.10
   6   1 -18   72.19   10.40
  -6  -1 -18   69.29    9.90
  -6   1  18   77.99   17.40
  -6   1  18   63.49   13.20
  -6  -1 -18   84.29   15.00
  -6  -1  18   57.99   13.20
  -6   1 -18   88.19   16.10
   6  -1 -18   83.29   10.50
  -6  -1  18   80.29   12.60
   6  -1 -18   90.49   10.30
  -7   1  18    4.50   15.20
  -7   1  18   24.40   11.60
   7   1 -18   12.70    7.10
  -7  -1 -18   25.70    9.00
   7   1 -18   19.60    7.40
  -7   1 -18   27.30   15.60
  -7  -1  18    6.10   11.80
  -7  -1  18   15.30   11.10
   7  -1 -18   21.60    7.10
  -8   1  18   40.30   10.00
   8   1 -18   22.10    5.60
  -8  -1 -18   25.00    7.80
  -8  -1  18   15.20    9.30
   8  -1 -18   28.70    6.00
   0  -2  18  241.48   21.80
   0   2  18  223.58   20.90
   0  -2  18  160.38   20.10
   0   2 -18  203.38   25.10
  -1   2  18    8.40   12.00
   1   2 -18   23.30   17.50
   1  -2  18   36.50   14.10
  -1   2 -18   15.30   16.00
  -1  -2  18   25.20   12.80
   1   2  18   43.10   12.60
   2   2 -18  377.06   28.50
   2  -2  18  345.97   27.90
  -2   2  18  354.76   26.30
  -2   2 -18  395.16   28.70
  -2  -2  18  487.75   30.10
  -3  -2 -18  441.76   15.90
   3  -2  18  432.76   30.80
  -3   2  18  442.36   29.70
   3   2 -18  407.76   29.90
   3   2 -18  416.46   14.10
   3   2  18  406.06   28.70
  -3  -2  18  422.86   29.80
   3  -2 -18  428.66   14.30
   4   2 -18  334.87   13.30
   4   2 -18  334.77   24.40
  -4  -2 -18  343.87   15.70
  -4  -2 -18  340.17   18.10
  -4  -2  18  314.17   19.50
   4  -2 -18  337.47   12.50
   4   2  18  319.17   29.80
  -4  -2  18  309.37   16.40
  -4   2 -18  311.17   19.00
  -5  -2 -18  147.29   17.10
   5   2 -18  135.69   12.20
  -5   2  18  140.59   17.70
  -5  -2 -18  111.39   12.60
   5  -2 -18  116.29    9.30
  -5   2 -18  129.39   21.00
   5  -2 -18  102.09   10.20
  -5  -2  18  115.89   16.00
  -5  -2  18  143.39   20.60
  -6  -2 -18  130.79   15.10
  -6   2  18  137.89   17.50
   6   2 -18  132.69   11.70
  -6   2  18  119.19   19.50
  -6  -2  18  128.49   17.40
  -6   2 -18  115.79   17.40
   6  -2 -18  101.89    9.50
   6  -2 -18  104.09   10.60
  -6  -2  18   93.69   14.30
  -7  -2 -18   68.89   10.20
  -7   2  18   54.99   11.60
  -7   2  18   57.19   16.20
   7   2 -18   65.39    7.80
   7   2 -18   38.90    7.50
  -7   2 -18   80.29   16.20
  -7  -2  18   57.79   10.80
  -7  -2  18   61.29   12.90
   7  -2 -18   77.39   10.90
  -8  -2 -18   12.90    7.50
   8   2 -18   11.90    6.30
  -8   2  18   -0.90    9.10
  -8   2  18   11.10   13.10
  -8   2 -18   28.80   13.30
   8  -2 -18   15.00    5.00
  -8  -2  18    2.70    8.10
  -8  -2  18   13.70    9.30
   0   3 -18  698.43   36.30
   0   3  18  642.04   32.30
   1  -3  18   86.89   15.60
   1   3 -18  116.09   24.90
  -1   3  18   82.89   16.60
   1   3  18  102.09   17.60
  -1   3 -18  129.59   25.80
  -2   3  18   68.99   17.90
   2  -3  18   61.99   16.90
   2   3 -18   66.59   20.90
  -2   3 -18  107.49   20.50
   3   3 -18   10.30   13.30
   3  -3  18   15.70   15.40
   3   3 -18   13.00   19.30
   3   3 -18   12.30    7.00
  -3   3  18   -1.40   15.60
  -3  -3 -18   13.80    8.70
  -3  -3 -18   16.00    8.80
  -3  -3  18   37.30   13.10
  -3   3 -18    4.70   10.70
   3   3  18   10.30   13.80
   3  -3 -18   10.10   11.70
  -3   3 -18   17.10   10.60
   3  -3 -18   16.40    6.20
  -4  -3 -18  318.07   15.80
  -4  -3 -18  330.47   18.10
   4   3 -18  332.77   13.70
   4   3 -18  325.77   25.20
   4  -3 -18  313.67   12.40
  -4  -3  18  316.57   23.10
  -4   3 -18  307.07   19.60
   4  -3 -18  329.87   13.10
   5   3 -18  221.88   14.40
  -5  -3 -18  214.78   16.40
  -5  -3 -18  237.48   18.50
  -5   3  18  214.68   17.80
  -5   3 -18  231.08   22.20
  -5  -3  18  208.98   25.20
   5  -3 -18  241.38   12.80
  -5  -3  18  240.78   24.30
   5  -3 -18  253.07   12.10
   6   3 -18  347.17   15.40
  -6   3  18  323.77   29.90
  -6  -3 -18  349.17   19.20
  -6   3  18  310.67   20.80
  -6  -3 -18  350.26   18.00
  -6  -3  18  294.57   23.10
   6  -3 -18  343.77   13.90
  -6  -3  18  345.77   17.40
  -6   3 -18  314.37   24.90
  -7   3  18   99.79   14.90
   7   3 -18  110.69   10.30
  -7  -3 -18  139.49   12.90
  -7   3  18   75.29   16.80
  -7  -3  18  136.29   14.60
   7  -3 -18  121.29   10.20
  -7   3 -18  120.49   16.20
  -7  -3  18   75.49   13.10
  -8   3  18   48.00   12.30
  -8  -3  18   19.20    8.20
  -8  -3  18   36.30    8.30
   8  -3 -18   29.10    4.40
  -8   3 -18   31.60   12.30
   0   4 -18   16.20   20.70
   0  -4 -18   38.40    6.20
   0   4 -18   24.60   11.80
   0   4  18   15.70   15.40
   0  -4 -18   20.70   12.70
   0   4 -18    9.00   14.20
  -1  -4 -18  219.68   19.00
  -1   4  18  198.78   26.50
   1   4 -18  198.08   18.40
   1   4 -18  230.48   35.20
   1   4 -18  207.88   22.70
  -1  -4 -18  202.98   10.60
   1  -4 -18  226.18   10.40
   1   4  18  278.17   25.70
  -1   4 -18  235.78   20.30
  -1   4 -18  229.28   32.30
   1  -4 -18  247.78   19.90
   2   4 -18  709.93   19.40
   2   4 -18  756.62   30.70
  -2   4  18  802.22   54.59
   2   4 -18  715.63   23.70
   2   4 -18  793.32   44.80
  -2  -4 -18  756.32   19.00
  -2   4 -18  756.92   27.50
   2  -4 -18  762.22   20.80
  -2   4 -18  758.82   40.50
   2  -4 -18  794.02   28.10
  -2  -4  18  797.42   27.70
   2   4  18  717.63   33.70
   3   4 -18  319.97   13.20
   3   4 -18  337.37   23.20
   3   4 -18  336.27   34.00
   3  -4 -18  377.66   12.70
  -3   4 -18  321.77   20.20
  -3  -4  18  359.06   19.40
   3  -4 -18  334.37   20.70
   4   4 -18  495.95   28.60
  -4  -4 -18  486.05   20.90
   4   4 -18  518.95   17.70
  -4  -4 -18  465.15   19.00
  -4  -4  18  520.95   25.00
   4  -4 -18  526.65   16.20
  -4   4 -18  531.95   24.60
   4  -4 -18  494.15   16.40
   5   4 -18   15.50   16.10
  -5   4  18   31.40   10.30
  -5  -4 -18   31.90    8.80
  -5  -4 -18   26.60   11.50
   5   4 -18   41.70   10.00
  -5   4 -18   11.80   13.90
   5  -4 -18   30.00    7.50
  -5  -4  18   24.90   13.70
   5  -4 -18   21.50    6.40
   6   4 -18   86.69   12.80
  -6   4  18   82.29   13.30
  -6  -4 -18   75.39   10.20
  -6   4  18   86.29   18.90
   6  -4 -18   65.29    9.40
  -6  -4  18   71.79   13.50
  -6   4 -18   80.19   15.60
   7   4 -18  157.28   10.90
  -7   4  18  127.49   16.70
   7  -4 -18  158.98    9.60
  -7   4 -18  128.59   21.00
  -7  -4  18  149.88   18.00
   0   5 -18  313.97   25.10
   0  -5 -18  312.87   21.90
   0  -5 -18  325.17   13.20
   0   5 -18  310.87   21.30
   0   5 -18  292.87   39.10
   1   5 -18  381.76   22.80
  -1  -5 -18  378.56   14.20
   1   5 -18  356.66   28.80
   1   5 -18  375.46   41.50
  -1   5 -18  343.17   23.90
  -1   5 -18  435.86   25.20
   1  -5 -18  384.26   21.60
  -1   5 -18  348.27   34.50
   1  -5 -18  379.36   13.30
   2   5 -18  367.06   25.70
   2   5 -18  317.67   14.60
   2   5 -18  343.77   21.90
   2   5 -18  333.57   43.60
  -2   5 -18  312.97   22.20
   2  -5 -18  281.07   11.90
   2  -5 -18  280.97   21.10
   3   5 -18   12.90   16.20
   3   5 -18    7.70    8.30
   3   5 -18  -12.90   25.20
   3  -5 -18   -4.50    6.40
  -3   5 -18    6.90   12.30
   3  -5 -18    0.80    6.70
  -3  -5  18    5.40   12.60
   4   5 -18  123.59   25.90
   4   5 -18  173.28   13.40
   4  -5 -18  138.59   11.30
   4  -5 -18  160.98   10.30
  -4  -5  18  158.08   20.70
   5   5 -18   52.39   17.30
  -5   5  18   61.99   18.00
   5   5 -18   62.59   10.10
   5  -5 -18   40.80    7.40
  -5   5 -18   38.00   20.50
   5  -5 -18   39.40    6.70
  -5  -5  18   21.60   13.00
   6   5 -18   82.49   11.50
  -6   5  18   84.19   17.50
   6  -5 -18   81.89    8.90
  -6  -5  18   78.29   12.90
  -6   5 -18   62.69   14.30
   7   5 -18  106.29    9.20
  -7   5  18  118.19   19.50
   7  -5 -18  115.79    7.40
  -7  -5  18  121.69   14.50
   0   6 -18  251.17   26.50
   0   6 -18  240.08   25.20
   0  -6 -18  187.68   12.80
   0   6 -18  194.48   33.90
   1   6 -18   11.00   29.70
   1   6 -18   44.50   14.90
   1   6 -18   63.69   20.70
  -1   6 -18   -1.60   22.80
   1  -6 -18   65.79   13.40
   1  -6 -18   69.69    9.70
  -1   6 -18   90.29   18.00
  -1   6 -18   28.60   16.20
   2   6 -18  456.15   32.00
   2   6 -18  321.07   45.00
   2   6 -18  395.66   23.70
   2   6 -18  389.96   15.90
   2  -6 -18  345.27   14.20
   2  -6 -18  358.36   14.20
  -2   6 -18  405.36   24.90
   3   6 -18   48.30    8.90
   3   6 -18   80.49   19.50
   3  -6 -18   79.89   10.90
   3  -6 -18   76.39   10.00
  -3   6 -18   57.89   13.00
   4   6 -18  124.69   25.70
   4   6 -18  107.19   12.30
   4  -6 -18  133.39   11.20
  -4  -6  18  109.99   17.90
   4  -6 -18  118.69    9.40
  -5   6  18    4.60   14.40
   5   6 -18   -2.70   14.80
   5   6 -18   24.00    8.70
   5  -6 -18    7.50    6.30
  -5  -6  18    2.00   10.80
  -6   6  18    6.00   12.10
   6   6 -18    8.70    7.20
   6  -6 -18   10.50    5.00
  -6  -6  18    2.60    9.20
   0   7 -18   31.60   17.40
   0  -7 -18    4.40    9.50
   0   7 -18    4.10   16.10
   1   7 -18   47.10   19.20
   1   7 -18   62.39   15.30
   1  -7 -18   41.80    7.70
  -1   7 -18   70.69   17.50
   1  -7 -18   36.30    7.90
   2   7 -18  106.99   20.70
   2   7 -18   75.39   13.50
   2   7 -18   78.39   10.40
   2  -7 -18   76.89   11.00
  -2   7 -18  144.49   22.60
   2  -7 -18   74.09    8.50
   3   7 -18   34.30   17.70
   3   7 -18   39.70    8.80
  -3   7 -18   23.40   12.20
   3  -7 -18   51.99    7.50
   3  -7 -18   46.30    6.90
   4   7 -18  142.89   22.30
   4   7 -18  164.18   11.80
   4  -7 -18  188.18   10.70
  -5   7  18   27.60   12.90
   5   7 -18   10.60   11.70
   5   7 -18   31.70    7.30
   5  -7 -18   15.60    4.90
   0   8 -18  -11.60   14.40
   0   8 -18    6.20   14.60
   0  -8 -18   -0.50    6.30
   1   8 -18   34.00   17.50
   1   8 -18   22.80   12.30
  -1   8 -18   58.09   14.90
   2   8 -18  106.19   16.80
   2   8 -18  145.89   23.60
   2  -8 -18  134.39   10.40
  -2   8 -18  162.28   18.40
   3   8 -18   55.49    7.40
   3   8 -18   68.39   16.20
  -3   8 -18   53.49   11.20
   3  -8 -18   74.59    8.20
   4   8 -18   20.40   13.40
   4   8 -18   37.80    5.90
   4  -8 -18   46.30    6.60
   0   9 -18   92.89   15.40
   0   9 -18  123.19   15.60
   1   9 -18    2.40    8.20
   1   9 -18    1.00   12.40
   1  -9 -18   -4.10    4.80
  -1   9 -18    4.30    9.30
   2   9 -18    6.10   12.30
  -2   9 -18    3.30    8.20
   0   0 -19  -14.00   14.80
   0   0  19    5.20   11.30
   1   0 -19   -3.20   15.80
  -1   0 -19    8.30   15.90
  -1   0  19    9.60   11.50
   2   0 -19  261.27   26.00
   2   0  19  267.57   28.10
  -2   0  19  270.97   26.50
  -3   0  19   -5.10   14.30
   3   0  19    3.10   14.30
   3   0 -19   10.60   14.90
   4   0 -19  318.57   20.70
   4   0 -19  326.67   12.80
  -4   0 -19  313.07   15.40
  -4   0  19  332.77   19.80
  -4   0 -19  331.17   20.20
  -5   0  19   -2.10   11.90
   5   0 -19    0.50    7.00
  -5   0  19   -3.70    9.80
  -5   0 -19    3.80    8.20
  -5   0 -19    2.30   14.80
  -6   0  19  115.29   18.50
  -6   0 -19   90.79   14.80
  -6   0 -19   99.09   13.30
   6   0 -19  115.49   11.00
  -6   0  19  124.69   14.20
  -7   0  19   85.69   11.60
  -7   0 -19   85.19   14.90
  -7   0 -19   72.79   10.40
   7   0 -19   76.69   10.10
   7   0 -19   89.09    9.60
  -8   0  19  187.18   15.60
   8   0 -19  208.08    9.50
   0  -1  19   91.59   14.00
   0   1 -19   78.39   19.00
   0   1  19   99.79   15.90
   1  -1  19  441.66   26.70
   1   1 -19  405.96   28.20
  -1   1  19  440.86   26.10
  -1   1 -19  440.86   28.20
  -1  -1  19  477.75   27.00
   1   1  19  454.15   24.50
   2  -1  19  573.74   31.80
   2   1 -19  647.64   33.60
  -2   1  19  570.84   32.10
  -2   1 -19  636.64   32.80
   2   1  19  647.24   34.90
  -2  -1  19  681.53   34.30
   3   1 -19  422.16   14.90
   3   1 -19  450.65   31.50
  -3   1  19  455.45   31.30
   3  -1  19  429.56   33.60
   3  -1 -19  366.36   14.10
  -3  -1  19  404.46   30.90
  -3   1 -19  359.16   33.60
   3   1  19  408.46   29.20
   4   1 -19   93.49   15.10
  -4   1  19   89.39   12.60
  -4  -1 -19  100.59   12.30
   4   1 -19   94.29    9.10
  -4  -1  19  122.99   18.50
  -4  -1  19  108.79   13.50
  -4   1 -19  110.29   18.90
   4  -1 -19   96.89    9.30
  -5   1  19  221.38   18.30
   5   1 -19  209.68   13.10
  -5  -1 -19  211.58   14.80
  -5  -1 -19  185.88   21.30
  -5  -1  19  230.58   19.90
  -5   1 -19  196.68   20.00
   5  -1 -19  177.68   11.70
  -5  -1  19  208.68   17.50
  -6   1  19  170.48   26.60
  -6  -1 -19  135.29   14.40
   6   1 -19  148.39   12.40
  -6   1  19  179.18   18.70
  -6  -1  19  163.98   18.70
   6  -1 -19  155.88   11.10
   6  -1 -19  171.58   11.20
  -6   1 -19  209.78   25.60
  -6  -1  19  175.18   20.10
  -7  -1 -19   90.09   10.00
  -7   1  19  135.99   23.30
   7   1 -19   77.09    9.60
   7   1 -19   96.79   12.30
  -7   1  19   69.99   11.80
  -7  -1  19  116.59   18.90
   7  -1 -19   82.69   10.50
  -7   1 -19   80.09   16.10
  -7  -1  19   68.19   11.80
  -8   1  19   32.70    9.50
   8  -1 -19   26.70    5.50
  -8  -1  19   17.10    9.00
   0   2  19  520.75   28.60
   0  -2  19  465.45   26.40
   0   2 -19  433.46   30.60
   1  -2  19   84.69   16.60
   1   2 -19   69.09   19.80
  -1   2  19   83.09   16.70
  -1   2 -19   82.09   21.40
   1   2  19   67.99   13.10
  -1  -2  19   50.09   14.60
   2   2 -19  295.07   27.10
  -2   2  19  275.87   25.60
   2  -2  19  265.77   26.90
  -2   2 -19  252.47   25.00
  -2  -2  19  289.87   24.80
   3   2 -19  339.17   12.70
   3  -2  19  341.37   29.50
  -3   2  19  314.07   28.90
  -3  -2 -19  343.47   15.50
   3   2 -19  354.06   29.80
   3   2 -19  346.07   23.30
  -3  -2  19  383.06   31.90
   3   2  19  388.16   31.00
  -3   2 -19  383.86   21.30
   3  -2 -19  355.16   13.60
   3  -2 -19  349.27   22.30
   4   2 -19   43.70   15.20
   4   2 -19   23.80    7.40
  -4  -2 -19   28.80    8.90
   4  -2 -19   33.40    6.90
  -4   2 -19   22.30   11.80
  -4  -2  19   13.70   12.50
  -4  -2  19   29.30    9.30
   5   2 -19  168.58   13.10
  -5  -2 -19  148.09   14.80
  -5   2  19  174.28   18.00
  -5  -2  19  176.58   20.70
   5  -2 -19  195.28   10.70
  -5  -2  19  205.78   16.50
  -5   2 -19  231.38   22.90
  -6   2  19  168.18   30.10
  -6   2  19  191.28   18.20
  -6  -2 -19  179.18   15.80
   6   2 -19  174.58   13.20
  -6  -2  19  133.79   17.70
  -6   2 -19  197.38   24.50
   6  -2 -19  168.58   11.40
  -6  -2  19  175.28   21.60
   6  -2 -19  167.08   10.70
   7   2 -19   70.09   10.70
  -7  -2 -19   52.69    9.20
  -7   2  19   55.59   15.70
  -7   2  19   49.70   11.30
  -7   2 -19   70.79   16.10
  -7  -2  19   57.59   13.00
  -7  -2  19   77.99   11.10
   7  -2 -19   60.19   10.00
  -8   2  19  160.18   17.80
  -8   2  19  168.48   12.70
  -8  -2  19  184.08   12.20
  -8  -2  19  164.68   14.20
   8  -2 -19  183.18    8.30
   0   3  19  799.12   35.60
   0   3 -19  682.83   38.10
  -1   3  19   25.60   14.70
   1   3 -19   19.50   21.80
   1  -3  19   30.40   13.80
  -1   3 -19   52.09   21.00
   1   3  19   48.80   14.30
  -2  -3 -19  157.68   12.30
  -2   3  19  162.08   24.60
   2  -3  19  119.49   18.80
   2   3 -19  128.49   18.10
   2   3 -19  151.18    9.90
   2   3 -19  147.99   27.00
  -2   3 -19  175.68   27.00
   2  -3 -19  147.29   10.40
   2  -3 -19  173.48   16.70
  -2   3 -19  157.38   17.40
   3   3 -19   84.09   16.80
   3   3 -19   80.69   24.60
   3   3 -19   62.29    9.30
  -3  -3 -19   72.79    9.30
  -3  -3  19   77.79   12.30
  -3   3 -19   89.79   12.50
   3   3  19   75.29   18.00
  -3   3 -19   77.59   11.60
   3  -3 -19   81.59    8.80
   3  -3 -19  109.19   14.50
   4   3 -19   81.89   10.90
   4   3 -19   90.69   17.30
  -4  -3 -19   87.09   10.20
  -4   3 -19   69.29   13.10
  -4  -3  19   66.59   13.50
   4  -3 -19   78.09    8.00
   5   3 -19   10.90    9.00
  -5  -3 -19   13.50   10.30
  -5   3  19    8.70   10.20
  -5   3 -19   47.00   14.90
   5  -3 -19    9.10    6.20
   5  -3 -19   19.80    6.80
  -5  -3  19   18.80   15.00
   6   3 -19  170.38   12.70
  -6  -3 -19  185.48   15.10
  -6   3  19  154.88   18.60
  -6   3  19  169.18   20.30
   6  -3 -19  155.58   10.70
  -6   3 -19  146.89   23.30
  -6  -3  19  166.78   15.30
  -6  -3  19  143.79   22.30
   7   3 -19   90.09   10.90
  -7   3  19   95.29   11.00
  -7   3  19   69.59   16.30
  -7  -3 -19   99.29   14.10
  -7  -3  19   72.09   12.60
   7  -3 -19   80.69    8.90
  -7   3 -19   47.00   15.00
  -7  -3  19   90.39   13.80
  -8   3  19   38.10   16.70
  -8  -3  19   16.90    7.80
   0   4  19  444.86   29.10
   0   4 -19  440.76   38.10
   0   4 -19  482.25   21.60
   0   4 -19  494.15   24.40
   0  -4 -19  440.56   15.00
   0  -4 -19  512.55   22.10
   1   4 -19   20.60   21.50
   1   4 -19   17.40   12.20
   1   4 -19   40.20   14.30
  -1   4  19   24.40   15.40
  -1  -4 -19   37.60   12.90
  -1  -4 -19   15.40    6.40
  -1   4 -19   20.90   20.30
   1  -4 -19   27.10   11.70
   1   4  19   19.90   14.30
  -1   4 -19    4.60   14.20
   1  -4 -19   30.20    7.00
  -1   4 -19   20.30   12.90
   2   4 -19  330.77   12.80
  -2  -4 -19  335.47   19.30
   2   4 -19  296.27   24.40
  -2  -4 -19  334.67   12.20
   2   4 -19  278.97   19.20
   2   4 -19  349.87   35.60
  -2   4 -19  337.17   33.50
   2  -4 -19  316.17   12.40
  -2   4 -19  294.97   18.20
  -2  -4  19  301.37   21.00
   2  -4 -19  334.17   21.40
   3   4 -19  112.59   11.40
   3   4 -19  145.89   23.50
   3   4 -19  101.59   27.60
   3  -4 -19  115.19   17.70
  -3   4 -19   74.49   12.70
  -3  -4  19   93.09   13.60
   3  -4 -19   92.69   10.10
   4   4 -19  257.17   13.50
   4   4 -19  287.67   27.30
  -4   4 -19  222.98   22.40
  -4  -4  19  238.28   21.90
   4  -4 -19  221.28   11.80
   4  -4 -19  221.38   10.80
   5   4 -19   20.70   17.40
  -5  -4 -19   48.50   10.70
  -5   4  19   30.10   10.70
   5   4 -19   40.20    9.00
   5  -4 -19   17.90    6.00
  -5   4 -19   10.70   14.60
   5  -4 -19   36.00    7.10
  -5  -4  19   38.70   14.00
  -6   4  19  153.58   16.20
  -6   4  19  150.08   19.70
   6   4 -19  169.38   12.30
  -6   4 -19  136.69   21.60
   6  -4 -19  125.39   10.30
  -6  -4  19  119.69   14.20
  -7   4  19   17.40   14.30
   7   4 -19   -2.50    5.90
  -7   4 -19    7.30   12.30
  -7  -4  19   11.20   11.00
   7  -4 -19    5.40    4.70
   0  -5 -19 1062.49   34.90
   0   5 -19 1069.69   52.89
   0   5 -19 1068.19   34.80
   0  -5 -19 1084.89   26.50
   0   5 -19 1029.70   36.00
   1   5 -19   83.39   17.30
   1   5 -19   97.79   19.80
  -1  -5 -19   89.79   10.50
   1   5 -19  100.59   28.00
   1  -5 -19   71.79   10.60
   1  -5 -19   62.09   15.40
  -1   5 -19   38.50   22.90
  -1   5 -19   39.00   15.20
  -1   5 -19   84.49   15.20
   2   5 -19  390.56   28.90
   2   5 -19  340.37   37.50
   2   5 -19  320.57   20.30
   2   5 -19  278.17   13.40
   2  -5 -19  357.96   22.70
   2  -5 -19  325.17   12.80
  -2   5 -19  343.07   20.40
   3   5 -19  334.07   41.50
   3   5 -19  499.05   31.00
   3   5 -19  443.86   16.80
  -3  -5  19  413.16   22.90
  -3   5 -19  391.46   21.00
   3  -5 -19  410.46   14.70
   3  -5 -19  370.56   13.40
   4   5 -19    7.80   16.60
   4   5 -19    3.40    8.50
   4  -5 -19    4.60    6.70
   4  -5 -19    3.10    6.10
  -4  -5  19    4.70   12.60
   5   5 -19   88.59   12.80
  -5   5  19   92.19   19.20
   5   5 -19   54.39   16.30
   5  -5 -19   67.79    9.70
  -5  -5  19   85.29   13.70
   5  -5 -19   65.69    8.10
  -6   5  19  145.99   17.40
   6   5 -19  175.58   12.40
  -6   5 -19  118.69   15.30
   6  -5 -19  170.48   10.20
  -6  -5  19  158.48   17.70
   7   5 -19    6.80    5.20
  -7   5  19   17.20   12.20
   7  -5 -19    8.60    5.80
  -7  -5  19   27.20    8.90
   0   6 -19  265.17   26.10
   0   6 -19  203.88   39.20
   0   6 -19  265.37   25.60
   0  -6 -19  263.07   13.70
   1   6 -19   73.99   14.40
   1   6 -19   62.39   28.20
   1   6 -19   84.69   18.50
  -1   6 -19   10.20   24.50
  -1   6 -19  122.39   21.10
   1  -6 -19  100.39   10.20
   2   6 -19  236.78   21.20
   2   6 -19  242.88   12.70
   2   6 -19  264.17   30.00
   2   6 -19  165.98   31.20
  -2   6 -19  298.27   23.20
   2  -6 -19  263.57   12.90
   2  -6 -19  282.37   13.30
   3   6 -19   34.80    9.00
   3   6 -19   62.19   20.30
   3  -6 -19   30.70    7.30
   3  -6 -19   24.60    7.10
  -3   6 -19   28.00   12.70
   4   6 -19   32.50    8.20
   4   6 -19   35.00   17.50
   4  -6 -19   21.10    6.70
  -4  -6  19   12.70   10.90
   4  -6 -19   14.60    5.90
   5   6 -19  141.59   11.80
   5   6 -19   79.79   15.30
  -5   6  19   93.79   15.40
   5  -6 -19   96.89    9.60
  -5  -6  19   74.19   11.70
  -6   6  19   42.10   11.80
   6   6 -19   78.59    9.60
   6  -6 -19   77.19    7.60
  -6  -6  19   74.49    9.70
   0   7 -19   87.09   17.60
   0   7 -19  158.88   24.50
   1   7 -19   48.60   18.80
   1   7 -19   67.79   14.80
   1  -7 -19   44.90    7.90
  -1   7 -19   54.99   17.30
   2   7 -19  255.77   12.10
   2   7 -19  254.57   20.40
   2   7 -19  287.67   27.60
   2  -7 -19  311.07   13.50
   2  -7 -19  303.87   13.20
  -2   7 -19  334.57   22.70
   3   7 -19   39.00    7.80
   3   7 -19   60.69   18.00
   3  -7 -19   53.19    7.20
   3  -7 -19   70.89    9.50
  -3   7 -19   56.59   12.60
   4   7 -19    7.70   16.20
   4   7 -19   17.10    7.80
   4  -7 -19    8.40    5.40
  -5   7  19   12.80   14.30
   5   7 -19   11.60   12.30
   5   7 -19   27.80    6.70
   5  -7 -19   44.70    7.00
   0   8 -19    8.90   15.00
   0   8 -19   30.70   13.10
   1   8 -19   11.20   15.80
   1   8 -19   25.90   11.90
  -1   8 -19   37.70   13.40
   1  -8 -19   13.70    6.50
   2   8 -19  237.08   25.70
   2   8 -19  179.18   16.30
   2  -8 -19  257.87   10.70
  -2   8 -19  260.07   20.30
   3   8 -19   42.60   14.50
   3   8 -19   32.10    6.20
  -3   8 -19   21.30   10.10
   3  -8 -19   47.90    7.90
   4   8 -19   15.20    5.90
   4   8 -19    9.70   11.50
   0   9 -19   27.20    9.90
   1   9 -19   -8.10   12.90
   1   9 -19    0.90    8.10
  -1   9 -19   23.30    9.20
   0   0 -20 1180.88   45.70
   0   0  20 1227.78   39.40
   1   0 -20   14.30   17.40
  -1   0 -20    4.70   15.90
  -1   0  20   24.20   14.20
   2   0  20  172.58   23.50
   2   0 -20  124.39   23.40
  -2   0  20  144.29   23.50
  -3   0  20   97.09   18.90
   3   0  20   96.79   18.90
   3   0 -20   93.49   10.40
   3   0 -20  109.99   23.50
   3   0 -20   99.89   21.10
   4   0 -20    2.40   12.80
   4   0 -20    5.90    6.60
  -4   0 -20   -0.50    8.00
  -4   0 -20   -9.60   13.80
  -4   0  20    3.70   12.10
  -5   0 -20    5.80   13.60
  -5   0  20    1.00   10.40
  -5   0  20   15.70   12.90
   5   0 -20    5.00    7.50
  -5   0 -20   -0.70    8.70
  -6   0 -20  153.88   24.40
   6   0 -20   70.59   10.60
  -6   0  20   85.89   12.70
  -6   0  20  126.99   19.80
  -6   0 -20   93.69   10.10
  -7   0  20    1.80   10.10
   7   0 -20   11.20    6.20
  -8   0  20   43.10    9.30
   0   1 -20   78.39   19.30
   0  -1  20   43.40   14.70
   0   1  20   37.10   12.80
  -1   1  20  879.91   36.50
   1   1 -20  898.21   41.40
   1  -1  20  866.61   36.50
  -1  -1  20  980.80   38.80
  -1   1 -20  867.11   38.00
   2  -1  20  301.97   26.60
   2   1 -20  284.47   27.20
  -2   1  20  301.47   25.50
  -2  -1  20  312.07   28.70
   2   1  20  267.07   27.50
  -2   1 -20  312.87   26.90
  -3   1  20   68.19   19.10
   3  -1  20   67.29   17.60
   3   1 -20   69.89   20.60
  -3  -1 -20   68.69    8.90
   3   1 -20   62.89   12.70
   3   1 -20   62.69    8.40
   3   1  20   51.89   16.60
  -3   1 -20   66.49   13.10
  -3  -1  20   82.59   20.60
   3  -1 -20   79.79   12.70
   3  -1 -20   75.39    9.60
   4   1 -20   12.20   13.20
  -4  -1 -20   19.70    8.00
   4   1 -20   17.60    6.30
  -4   1  20   22.30   11.80
   4  -1 -20   13.60    7.00
  -4  -1  20   25.50   13.10
  -4  -1  20   19.10    9.20
  -4   1 -20    5.30   12.40
   5   1 -20   33.60    7.40
  -5   1  20   40.20   11.50
  -5  -1 -20   44.00   10.90
  -5  -1  20   40.80   11.30
   5  -1 -20   41.70    7.80
  -5   1 -20   44.10   15.30
  -5  -1  20   24.40   12.70
   6   1 -20  819.52   22.30
  -6   1  20  819.42   27.20
  -6   1  20  793.32   34.10
  -6  -1 -20  806.72   24.00
  -6   1 -20  868.71   32.80
  -6  -1  20  833.22   27.50
  -6  -1  20  776.42   28.60
   6  -1 -20  826.42   21.90
  -7  -1 -20  224.88   14.60
   7   1 -20  200.38   11.30
  -7   1  20  181.68   17.30
  -7  -1  20  239.08   19.70
  -7  -1  20  246.98   18.90
   7  -1 -20  216.58   11.10
  -7   1 -20  257.87   24.60
  -8   1  20  105.09   13.20
  -8  -1  20   94.89   12.70
   0   2  20  456.55   27.40
   0  -2  20  445.76   25.00
   0   2 -20  511.05   31.40
   1   2 -20   37.30   17.70
   1  -2  20   21.60   13.00
  -1   2  20    3.60   16.10
  -1  -2  20   24.10   14.10
  -1   2 -20   22.40   18.00
   1   2  20   18.20   12.60
   2   2 -20  179.08   26.80
   2  -2  20  162.98   25.50
  -2   2  20  166.18   21.90
   2  -2 -20  160.08   10.20
  -2   2 -20  142.79   25.80
  -2  -2  20  193.78   26.00
   3   2 -20  163.38   21.80
  -3  -2 -20  167.58   12.00
   3   2 -20  210.78   27.40
   3  -2  20  153.18   25.80
   3   2 -20  161.68   11.70
  -3   2  20  159.28   24.20
  -3   2 -20  126.29   20.40
   3  -2 -20  126.19   18.20
   3  -2 -20  140.49   10.70
  -3  -2  20  141.99   22.90
  -3   2 -20  111.69   15.10
   3   2  20  111.09   18.90
   4   2 -20   90.19   10.10
  -4  -2 -20   88.29    9.70
   4   2 -20   71.99   15.60
  -4  -2  20   90.09   14.30
  -4   2 -20   88.49   14.90
   4  -2 -20   88.99    9.30
  -4  -2  20   76.49   10.00
   5   2 -20   78.89   12.00
  -5   2  20   58.99   12.20
  -5  -2 -20   82.39   11.10
  -5   2 -20   84.79   14.70
   5  -2 -20   82.49   10.30
  -5  -2  20   99.69   15.80
  -5  -2  20   91.09   14.90
  -6  -2 -20  180.08   14.90
  -6   2  20  188.38   30.10
   6   2 -20  168.78   12.20
  -6   2  20  155.58   17.70
  -6   2 -20  197.08   25.20
  -6  -2  20  147.39   21.00
   6  -2 -20  144.89   11.20
  -6  -2  20  166.78   17.30
   6  -2 -20  142.89   10.80
  -7   2  20   51.19   15.10
   7   2 -20   16.10    6.80
  -7  -2 -20   20.70    9.20
  -7   2  20   21.60   10.70
   7  -2 -20   31.80    6.20
  -7  -2  20   48.20   10.40
  -7  -2  20   34.30   12.10
  -7   2 -20   41.90   15.40
  -8   2  20   11.80    7.90
  -8  -2  20   13.20    6.80
  -8  -2  20   12.80    9.90
   0   3  20   12.60   12.70
   0   3 -20   20.00   22.10
   0  -3 -20   15.90    8.10
   0  -3 -20   14.80   13.80
   0   3 -20   11.50   10.00
  -1  -3 -20   81.09   13.00
   1   3 -20   79.29   11.90
  -1   3  20   99.59   19.30
  -1  -3 -20   96.49   15.30
   1   3 -20   96.09   22.80
   1   3 -20   71.39   13.80
   1   3  20   88.49   16.90
   1  -3 -20   67.19   11.20
   1  -3 -20   70.09   12.70
  -1   3 -20   70.09   22.50
  -1   3 -20   59.19   11.20
   1  -3 -20   53.59    7.70
   2   3 -20  513.75   16.20
   2   3 -20  488.85   19.60
  -2  -3 -20  517.55   18.80
   2   3 -20  541.55   24.30
  -2  -3 -20  557.74   23.50
   2   3 -20  554.54   36.70
  -2   3  20  517.95   33.80
   2  -3 -20  562.94   23.10
  -2   3 -20  547.15   21.40
  -2   3 -20  583.74   36.00
   2  -3 -20  549.35   16.30
   3   3 -20  497.05   16.90
   3   3 -20  497.95   27.90
   3   3 -20  429.86   33.90
   3  -3 -20  470.05   24.00
  -3  -3  20  503.05   23.50
  -3   3 -20  477.45   21.40
   3  -3 -20  486.75   15.70
  -3   3 -20  442.36   21.70
  -4  -3 -20   41.10    9.60
   4   3 -20   20.10   15.30
   4   3 -20   19.10    8.70
  -4   3 -20   31.10   13.10
   4  -3 -20   41.20    6.80
  -4  -3  20   35.30   13.90
   5   3 -20  167.58   12.60
  -5  -3 -20  172.28   15.80
   5   3 -20  123.59   25.10
  -5   3  20  162.48   17.10
   5  -3 -20  110.19    9.70
  -5   3 -20  118.09   16.60
  -5  -3  20   84.59   15.50
   6   3 -20   54.89    8.40
  -6   3  20   36.60   11.50
  -6  -3 -20   67.39   10.60
  -6   3  20   35.40   17.50
   6  -3 -20   53.49    8.00
   6  -3 -20   62.89    9.50
  -6   3 -20   66.19   15.90
  -6  -3  20   63.89   10.30
  -6  -3  20   62.49   14.20
   7   3 -20   69.79   10.20
  -7   3  20   70.39   10.10
  -7   3  20   70.09   16.00
  -7  -3  20   79.29    8.90
  -7   3 -20   88.19   15.20
  -7  -3  20   60.19   12.00
   7  -3 -20   71.59    8.50
   0   4 -20   -6.30   14.00
   0   4  20    4.30   22.50
   0   4 -20    6.30   11.90
   0   4 -20   16.10   21.70
   0  -4 -20   16.40   11.90
   0  -4 -20    7.40    5.90
  -1  -4 -20  118.29    8.70
  -1  -4 -20  126.39   18.90
   1   4 -20  121.79   20.10
   1   4 -20  115.59   14.90
   1   4 -20  134.09   27.20
   1  -4 -20  116.49    9.20
  -1   4 -20   97.79   16.00
   1  -4 -20  110.69   16.90
  -1   4 -20  102.59   24.30
   1   4  20  115.89   26.70
  -1   4 -20  119.09   16.00
   2   4 -20  945.41   28.80
   2   4 -20  909.81   32.40
  -2  -4 -20  896.91   30.90
   2   4 -20  898.21   22.90
   2   4 -20 1005.60   49.30
  -2   4 -20  907.81   53.69
   2  -4 -20  939.01   24.00
  -2   4 -20  967.40   30.80
   2  -4 -20  945.31   31.60
  -2  -4  20  922.41   29.70
   3   4 -20  328.27   14.20
   3   4 -20  320.37   23.60
   3   4 -20  277.07   38.10
   3  -4 -20  283.87   11.80
  -3   4 -20  269.17   19.20
   3  -4 -20  283.27   20.40
  -3  -4  20  276.77   20.80
   4   4 -20   24.30    9.40
   4   4 -20   -0.10   15.70
  -4   4 -20   -7.60   14.60
  -4  -4  20    3.40   12.70
   4  -4 -20   15.80    7.00
   5   4 -20    0.10   15.60
  -5   4  20  -16.00   10.00
   5   4 -20   17.20    9.20
  -5  -4  20    4.00   13.40
   5  -4 -20    5.90    5.50
  -5   4 -20   12.70   15.20
   5  -4 -20    6.10    6.20
  -6   4  20   69.09   17.50
  -6   4  20   50.09   10.50
   6   4 -20   59.39    9.00
   6  -4 -20   67.79    8.80
  -6   4 -20   67.49   15.30
  -6  -4  20   54.89   12.90
  -7   4  20   84.39   14.60
   7   4 -20  119.99    9.80
  -7  -4  20   89.29   11.20
   7  -4 -20   96.89    7.80
   0  -5 -20   16.60   13.40
   0   5 -20   30.70   14.60
   0   5 -20   23.70   24.50
   0   5 -20   28.60   16.00
   0  -5 -20   29.80    7.60
  -1  -5 -20   22.80    7.20
   1   5 -20   24.90   25.70
   1   5 -20   32.20   15.30
   1   5 -20   27.30   11.50
   1  -5 -20   31.90   15.20
  -1   5 -20    0.90   24.20
   1  -5 -20   27.60    8.00
  -1   5 -20   38.50   13.00
  -1   5 -20   20.20   15.10
   2   5 -20  105.69   22.50
   2   5 -20   68.49   12.50
   2   5 -20   72.89   29.80
   2   5 -20   80.89   11.00
  -2   5 -20  113.09   19.70
   2  -5 -20   95.39   19.90
   2  -5 -20   90.39   10.70
  -2  -5  20   82.69   21.40
   3   5 -20  126.49   25.50
   3   5 -20  122.39   11.80
   3   5 -20  104.49   30.20
  -3   5 -20   86.29   17.60
   3  -5 -20   99.49   10.20
  -3  -5  20  112.49   14.30
   4   5 -20   96.39   12.70
   4   5 -20   70.29   19.00
  -4  -5  20   68.39   13.50
   4  -5 -20   75.69   10.50
   4  -5 -20   69.29    9.10
   5   5 -20    8.30    8.20
   5   5 -20    7.10   16.20
  -5   5  20   12.80   17.40
   5  -5 -20   16.60    5.70
  -5  -5  20   -9.90   12.10
   5  -5 -20   10.20    6.20
   6   5 -20  196.78   12.70
  -6   5  20  228.68   24.10
  -6  -5  20  206.18   18.10
   6  -5 -20  203.38    9.90
  -7   5  20   13.50   10.90
   7   5 -20   17.00    5.60
  -7  -5  20   33.20    8.30
   0   6 -20   30.30   15.90
   0   6 -20   10.70   16.00
   0  -6 -20   19.50    8.10
   0   6 -20   -2.60   23.80
   1   6 -20   64.19   17.50
   1   6 -20   61.69   13.90
   1   6 -20   44.70   28.10
  -1   6 -20   62.79   16.30
   1  -6 -20   59.29    8.10
  -1   6 -20   25.90   26.10
   2   6 -20  213.68   13.00
   2   6 -20  233.98   20.80
   2   6 -20  247.68   24.90
   2  -6 -20  236.88   12.90
  -2   6 -20  253.57   22.30
   3   6 -20   64.49    8.70
   3   6 -20   42.50   17.80
   3  -6 -20   43.50    7.50
  -3   6 -20   32.90   12.50
   3  -6 -20   39.00    7.10
   4   6 -20  265.37   13.90
   4   6 -20  207.28   26.80
   4  -6 -20  250.77   10.60
   4  -6 -20  255.57   12.00
  -4  -6  20  209.28   18.40
   5   6 -20   16.50    7.80
  -5   6  20    5.20   13.70
   5   6 -20   18.50   14.20
  -5  -6  20   13.10   10.20
   5  -6 -20   12.10    5.50
   6   6 -20   10.60    6.00
  -6   6  20   25.00   11.30
   6  -6 -20   19.30    6.90
  -6  -6  20   21.40    8.50
   0   7 -20   39.20   16.60
   0   7 -20  113.59   21.60
   1   7 -20   97.99   19.90
   1   7 -20   81.99   18.80
  -1   7 -20  119.59   21.70
   1  -7 -20   75.49   10.50
   2   7 -20  143.49   26.50
   2   7 -20  124.39   18.50
   2  -7 -20  130.29   10.90
  -2   7 -20  168.18   21.80
   3   7 -20   35.20   16.80
   3   7 -20   28.80    7.80
   3  -7 -20   24.20    6.10
   3  -7 -20   38.50    6.50
  -3   7 -20   29.50   12.10
   4   7 -20   42.00    7.60
   4   7 -20   36.60   14.80
   4  -7 -20   50.39    8.40
   5   7 -20   26.30   13.50
   5   7 -20   56.69    7.90
   0   8 -20  206.08   19.80
   0   8 -20  120.99   22.50
   1   8 -20   33.10   11.90
   1   8 -20   37.90   15.50
  -1   8 -20   43.30   13.10
   2   8 -20   77.89   15.00
   2   8 -20  133.19   21.10
  -2   8 -20   94.99   17.30
   3   8 -20    2.10   14.90
   3   8 -20   -6.10    5.20
  -3   8 -20   -0.80    8.50
   0   9 -20   -2.80    8.80
  -1   9 -20   26.60    9.10
   0   0 -21  -15.40   17.00
   0   0  21   -7.10   11.30
  -1   0 -21  605.44   35.80
  -1   0  21  596.34   31.10
   1   0 -21  566.54   33.60
  -2   0  21  238.48   24.00
   2   0  21  250.07   26.10
   2   0 -21  259.47   30.10
   3   0 -21   83.59    8.90
  -3   0 -21   61.29   12.70
   3   0  21   85.39   20.80
   3   0 -21   76.39   12.60
  -3   0  21   84.49   18.20
  -4   0 -21  223.68   18.70
  -4   0  21  217.18   19.00
   4   0 -21  228.18   12.30
   4   0 -21  224.98   19.50
  -5   0 -21   24.80    9.80
   5   0 -21   28.30    7.20
  -5   0  21   16.10   11.40
  -5   0  21   47.00   13.90
  -5   0 -21   30.70   15.20
   6   0 -21   -1.40    6.80
  -6   0  21  -13.60   11.70
  -6   0  21   16.00   11.70
  -7   0  21  181.38   16.90
   7   0 -21  196.18   10.00
  -8   0  21   52.39    9.00
   0  -1  21  366.96   29.10
   0   1 -21  365.16   28.80
   0   1  21  363.36   26.80
  -1   1  21   25.70   16.10
   1  -1  21   24.30   13.70
   1   1 -21   52.79   20.80
  -1   1 -21   38.60   19.00
  -1  -1  21   56.49   15.30
   2  -1  21 1059.59   45.30
  -2   1  21 1112.49   41.70
   2   1 -21 1054.39   43.80
  -2  -1  21 1242.98   47.40
   2   1  21 1161.68   46.30
  -2   1 -21 1148.29   44.60
   3   1 -21   43.30   13.30
   3   1 -21   30.70    6.90
  -3   1  21   23.60   15.90
   3  -1  21   34.70   16.60
   3   1 -21   31.70   17.60
  -3  -1 -21   27.90   13.20
  -3   1 -21   21.70    8.60
   3   1  21    7.20   16.30
  -3  -1  21   30.30   16.00
   3  -1 -21   26.60   11.40
  -3   1 -21   23.50   11.70
   3  -1 -21   17.50    6.10
   4   1 -21  752.72   20.60
   4   1 -21  758.52   29.40
  -4  -1 -21  744.43   21.70
  -4   1  21  741.83   26.90
  -4   1 -21  637.54   25.80
   4  -1 -21  627.34   26.00
   4  -1 -21  663.03   18.30
  -4  -1  21  658.43   21.80
  -4  -1  21  640.64   26.10
   5   1 -21   48.20    7.80
  -5   1  21   74.29   12.60
  -5  -1 -21   63.29   10.10
  -5  -1  21   66.19   11.90
  -5  -1  21   72.49   14.00
  -5   1 -21   84.19   16.40
   5  -1 -21   69.39    9.30
  -6   1  21   94.09   12.60
  -6   1  21  155.28   19.60
   6   1 -21  128.79   12.10
  -6  -1 -21  105.59   14.00
  -6   1 -21  167.28   25.30
  -6  -1  21  128.99   18.10
   6  -1 -21   94.89    9.90
  -6  -1  21  120.59   19.10
   7   1 -21   13.90    6.50
  -7   1  21   15.00   10.80
  -7  -1  21   18.40   11.20
  -7  -1  21   10.80   10.60
  -8   1  21   56.19    8.30
  -8  -1  21   50.59    8.20
   0   2  21  309.67   25.10
   0  -2  21  291.77   24.00
   0   2 -21  303.97   29.00
   1   2 -21  148.99   29.10
   1  -2  21  159.38   24.30
  -1   2  21  144.19   24.90
  -1   2 -21  187.88   29.10
  -1  -2  21  145.59   21.50
  -2   2  21  295.47   30.10
   2  -2  21  305.17   26.60
   2   2 -21  288.47   11.80
   2   2 -21  303.47   29.90
   2   2 -21  305.57   20.50
  -2  -2 -21  294.77   14.70
  -2  -2  21  291.97   26.00
  -2   2 -21  325.07   29.70
  -2   2 -21  259.57   18.90
   2  -2 -21  280.67   11.40
   2  -2 -21  303.67   21.70
   2  -2 -21  271.17   15.50
  -3  -2 -21  152.88   14.10
   3   2 -21  147.79   10.40
   3   2 -21  134.59   25.60
   3   2 -21  133.49   22.90
   3  -2 -21  140.29   19.20
  -3   2 -21  145.89   22.70
   3  -2 -21  149.39   10.50
  -3   2 -21  123.29   16.10
   4   2 -21  176.28   11.40
   4   2 -21  211.98   22.80
  -4  -2 -21  156.88   15.60
  -4  -2  21  165.08   21.30
  -4  -2  21  140.79   15.10
  -4   2 -21  142.09   22.60
   4  -2 -21  157.98   10.00
   5   2 -21   15.60    8.00
  -5  -2 -21   16.70    8.90
  -5   2  21   -4.50   11.30
  -5   2 -21   13.80   15.40
  -5  -2  21    5.30   10.20
   5  -2 -21    8.10    6.50
  -5  -2  21   15.80   13.60
  -6   2  21  191.18   30.10
   6   2 -21  184.98   12.70
  -6   2  21  194.08   17.90
  -6  -2 -21  164.18   14.80
  -6  -2  21  219.88   17.90
  -6   2 -21  236.98   25.10
  -6  -2  21  207.18   22.10
   6  -2 -21  205.38   11.00
  -7   2  21   88.29   11.30
  -7   2  21   89.29   15.10
   7   2 -21   72.39    9.70
  -7  -2  21   88.69   12.50
  -7  -2  21   81.59   10.20
  -8   2  21  104.39   11.80
   0  -3 -21  517.05   18.40
   0  -3 -21  496.65   23.00
   0   3  21  552.34   32.80
   0   3 -21  483.35   24.50
   0  -3 -21  497.95   15.50
   0   3 -21  535.55   36.00
   0   3 -21  508.15   20.60
   1   3 -21  162.58   22.60
  -1  -3 -21  166.78    9.50
   1   3 -21  161.68   33.30
   1   3 -21  162.58   15.30
  -1  -3 -21  168.98   19.20
  -1   3  21  160.28   22.90
  -1  -3 -21  168.48   14.50
   1  -3 -21  145.49   14.10
  -1   3 -21  142.89   26.00
   1   3  21  148.29   21.00
  -1   3 -21  144.99   15.20
   1  -3 -21  128.29    9.00
  -1   3 -21  111.29   19.40
   1  -3 -21  142.49   19.10
   2   3 -21  298.77   36.00
  -2  -3 -21  274.67   20.10
   2  -3  21  287.27   29.20
   2   3 -21  287.47   18.80
  -2  -3 -21  300.77   15.30
   2   3 -21  322.57   24.90
   2   3 -21  289.37   12.90
  -2   3 -21  291.07   31.00
  -2   3 -21  308.37   20.00
   2  -3 -21  284.37   11.90
   2  -3 -21  318.17   22.40
   3   3 -21  440.76   15.20
   3   3 -21  437.66   38.20
   3   3 -21  447.66   24.90
  -3   3 -21  378.16   20.00
   3  -3 -21  405.46   14.60
  -3  -3  21  386.76   22.30
  -3   3 -21  371.46   23.90
   3  -3 -21  422.16   23.10
   4   3 -21  448.06   28.90
   4   3 -21  482.85   17.80
   4  -3 -21  361.56   13.40
  -4   3 -21  364.86   24.80
  -4  -3  21  344.87   23.80
  -5   3  21   46.60   10.90
   5   3 -21   43.90    8.70
   5   3 -21   28.80   16.30
  -5  -3  21   27.80   14.60
   5  -3 -21   32.90    7.10
  -5   3 -21   38.30   15.30
  -6   3  21  333.07   28.70
  -6   3  21  316.07   20.10
   6   3 -21  336.87   14.80
  -6  -3  21  263.47   22.70
  -6  -3  21  296.17   24.00
   6  -3 -21  250.57   10.40
  -6   3 -21  299.47   24.00
  -7   3  21   77.59   15.50
   7   3 -21   64.19    9.60
  -7   3  21   76.29    9.70
  -7  -3  21   71.89   11.80
   0  -4 -21  140.39   17.50
   0   4 -21  146.99   30.90
   0  -4 -21  114.29    9.00
   0   4 -21  126.39   19.10
   0   4 -21  103.59   16.40
   1   4 -21  157.28   16.30
   1   4 -21  143.59   30.20
  -1  -4 -21  174.48   19.70
   1   4 -21  130.09   22.90
  -1  -4 -21  139.69   10.20
   1  -4 -21  109.29   16.80
   1  -4 -21  137.19   10.30
  -1   4 -21  146.79   27.50
  -1   4 -21  115.39   21.50
  -1   4 -21  143.39   19.40
   2   4 -21  194.88   37.40
  -2  -4 -21  160.58   19.60
   2   4 -21  199.48   24.10
   2   4 -21  165.18   10.60
   2   4 -21  171.48   17.40
   2  -4 -21  203.88   20.70
  -2  -4  21  212.98   19.40
   2  -4 -21  182.48   10.80
  -2   4 -21  186.08   18.50
   3   4 -21  125.09   20.10
   3   4 -21   98.99   28.80
   3   4 -21  101.99   10.80
  -3  -4  21   87.89   13.50
   3  -4 -21   89.59   10.70
   3  -4 -21  104.29   18.40
  -3   4 -21   75.09   12.50
   4   4 -21   62.39    9.00
   4   4 -21   82.49   18.60
  -4   4 -21   95.89   16.50
  -4  -4  21   77.09   13.90
   4  -4 -21   82.09    8.90
   5   4 -21   42.00   16.00
  -5   4  21   39.50   10.50
   5   4 -21   60.09   10.30
  -5   4 -21   61.69   15.90
  -5  -4  21   58.99   14.20
   5  -4 -21   56.69    8.60
   6   4 -21  167.08   12.20
  -6   4  21  166.88   25.20
  -6   4  21  148.89   15.90
   6  -4 -21  166.88    9.80
  -6  -4  21  154.58   19.90
  -6   4 -21  168.18   21.90
   7   4 -21   20.00    5.50
  -7   4  21   19.20   12.40
  -7  -4  21   22.80   10.30
   0  -5 -21  104.29    9.80
   0   5 -21   76.79   15.40
   0   5 -21  134.59   18.00
   0   5 -21   99.89   27.50
   0  -5 -21  112.59   20.60
   1   5 -21  133.49   18.90
  -1  -5 -21  130.09   10.10
   1   5 -21  126.89   24.60
   1   5 -21  130.89   31.30
  -1   5 -21  137.49   21.10
   1  -5 -21  121.99   10.50
   1  -5 -21  112.09   18.10
  -1   5 -21   86.29   27.70
  -1   5 -21   70.49   22.30
   2   5 -21 1051.99   56.29
   2   5 -21 1043.50   32.30
   2   5 -21 1099.29   38.80
   2   5 -21 1032.80   26.40
   2  -5 -21 1006.40   34.10
  -2  -5  21 1031.80   35.00
  -2   5 -21 1013.40   32.50
   2  -5 -21 1010.50   25.70
   3   5 -21   26.30    8.80
   3   5 -21   40.30   27.10
   3   5 -21   38.20   18.40
  -3  -5  21   12.50   12.40
  -3   5 -21    9.70   12.00
   3  -5 -21   29.70    7.50
   4   5 -21   76.69   18.40
   4   5 -21   99.99   12.80
  -4  -5  21   85.79   13.60
   4  -5 -21  104.09    9.70
   5   5 -21   73.39    9.90
  -5   5  21   51.19   17.70
   5   5 -21   50.49   14.60
  -5  -5  21   70.09   13.10
   5  -5 -21   71.09    8.50
   5  -5 -21   67.79    9.10
   6   5 -21   13.90    6.80
  -6   5  21   17.90   14.50
   6  -5 -21   51.59    8.00
  -6  -5  21   36.10   10.70
   0   6 -21   20.70   16.50
   0   6 -21    6.50   30.10
   0   6 -21   54.19   14.90
   0  -6 -21   25.60    7.80
   1   6 -21   67.59   19.10
   1   6 -21  105.89   20.00
  -1   6 -21  125.59   22.70
   1  -6 -21   58.49    8.70
   2   6 -21   63.89   19.10
   2   6 -21   35.00    8.30
   2   6 -21   39.80   12.70
  -2   6 -21   51.59   14.10
   2  -6 -21   43.30    8.00
   3   6 -21  145.79   26.20
   3   6 -21  139.39   12.10
   3  -6 -21  117.89   10.80
  -3   6 -21  115.39   19.50
   4   6 -21  106.19   18.20
   4   6 -21  119.49   11.90
  -4  -6  21   70.99   11.20
   4  -6 -21   80.49    8.70
   5   6 -21   25.40   12.90
   5   6 -21   32.10    8.10
  -5   6  21   11.60   13.20
  -5  -6  21   23.70    9.80
   5  -6 -21   29.70    6.00
   6   6 -21   11.60    5.10
  -6   6  21   15.30   10.10
  -6  -6  21   22.50    9.40
   0   7 -21  115.79   21.10
   0   7 -21   56.79   16.60
   1   7 -21  148.09   20.50
   1   7 -21  127.69   25.00
  -1   7 -21  136.39   23.20
   2   7 -21  127.69   16.90
   2   7 -21  165.68   26.00
  -2   7 -21  156.78   20.30
   2  -7 -21  145.29   11.30
   3   7 -21   32.70   17.50
   3   7 -21   -1.20    7.00
   3  -7 -21    8.70    5.60
  -3   7 -21   -2.50   10.40
   4   7 -21   46.70   14.60
   4   7 -21   52.39    7.30
   5   7 -21   56.39    7.40
   0   8 -21    7.70   14.50
   0   8 -21    7.00   12.60
   1   8 -21   92.69   17.00
   1   8 -21   83.39   16.20
  -1   8 -21  104.59   17.30
   2   8 -21  106.99   14.10
   2   8 -21  149.99   22.10
  -2   8 -21  175.18   15.90
   3   8 -21  173.78   21.60
  -3   8 -21  142.49   13.50
   0   0 -22  165.98   25.80
   1   0 -22   27.10   20.60
  -1   0  22   28.50   13.80
   1   0  22   47.90   17.10
  -2   0  22  123.59   21.20
   2   0 -22   80.89    8.40
   2   0 -22   95.19   21.20
  -2   0 -22   80.99   12.10
   2   0 -22   94.39   13.90
   2   0  22   78.49   17.60
   3   0 -22  912.21   30.60
  -3   0 -22  829.62   24.60
   3   0 -22  839.72   21.90
   4   0 -22  275.17   21.40
  -4   0  22  256.77   19.90
   4   0 -22  260.37   12.30
   5   0 -22   31.50    8.30
  -5   0  22    4.80   13.30
  -5   0  22   17.20   10.90
  -6   0  22    3.80   11.70
   6   0 -22    3.90    7.20
  -6   0  22    1.60   10.80
   7   0 -22   20.90    5.90
  -7   0  22   31.20   10.10
  -8   0  22   55.59    8.00
   0  -1  22  134.39   21.40
   0   1  22  101.19   17.80
   0   1 -22  150.98   26.00
   1   1 -22   65.59   21.70
   1  -1  22   64.09   17.00
  -1   1  22   47.50   16.20
  -1   1 -22   39.60   20.20
  -1  -1  22   54.79   14.20
  -2   1  22 1422.76   50.19
   2   1 -22 1312.17   31.20
   2  -1  22 1294.77   49.80
   2   1 -22 1357.56   51.19
  -2  -1 -22 1356.36   35.00
   2   1 -22 1397.96   40.10
  -2  -1  22 1434.26   50.89
   2  -1 -22 1365.86   36.70
  -2   1 -22 1375.76   36.80
   2   1  22 1396.56   51.69
  -2   1 -22 1377.86   50.49
   2  -1 -22 1359.76   31.80
   2  -1 -22 1403.16   38.90
  -3  -1 -22  366.66   17.50
   3   1 -22  372.76   22.10
   3   1 -22  379.66   30.60
   3   1 -22  369.26   14.30
  -3   1 -22  377.96   18.80
   3  -1 -22  385.66   20.60
   3  -1 -22  382.86   14.10
   4   1 -22  271.97   22.30
  -4   1  22  275.37   20.50
   4   1 -22  266.07   12.20
  -4  -1  22  279.17   21.50
   4  -1 -22  273.17   20.60
  -4   1 -22  287.57   22.80
  -4  -1  22  261.27   17.50
   4  -1 -22  273.17   13.10
  -5   1  22  113.99   17.80
   5   1 -22  114.59   12.30
  -5   1 -22  147.59   24.00
   5  -1 -22  106.39   10.90
  -5  -1  22  107.39   17.10
  -5  -1  22  108.69   14.50
   6   1 -22   63.49    8.20
  -6   1  22  110.89   17.80
  -6   1  22   99.89   12.80
   6  -1 -22   78.79    9.70
  -6  -1  22   94.79   13.50
  -6  -1  22   84.69   12.30
  -7   1  22  106.79   15.90
   7   1 -22  123.79    9.30
  -7  -1  22  132.39   17.10
  -7  -1  22  106.99   15.70
   7  -1 -22   93.39    7.90
  -8   1  22  136.79   11.30
  -8  -1  22  128.69   11.40
   0   2 -22   -3.40   19.90
   0   2 -22   14.50   21.90
   0   2  22  -18.80   14.30
   0  -2 -22   13.60   11.60
   0  -2 -22   12.20    7.90
   0   2 -22   -2.90    9.60
  -1  -2 -22  185.58   13.20
   1   2 -22  206.58   16.20
   1   2 -22  181.38   19.50
  -1  -2 -22  191.98   19.20
  -1   2  22  155.48   23.40
   1   2 -22  198.18   27.80
   1  -2  22  228.58   24.20
  -1   2 -22  186.38   30.50
   1  -2 -22  177.38   10.70
   1  -2 -22  179.58   12.70
   1  -2 -22  192.08   20.70
  -1   2 -22  181.28   15.70
  -2  -2 -22   94.49   19.60
  -2  -2 -22   68.09   10.10
   2   2 -22   45.20   10.30
   2   2 -22   51.89    7.50
  -2   2  22   37.70   18.00
   2  -2  22   65.79   16.80
   2   2 -22   56.09   14.60
   2   2 -22   71.39   24.40
   2  -2 -22   58.09    8.30
  -2   2 -22   57.89   10.70
   2  -2 -22   95.69   15.10
   2  -2 -22   69.29   10.00
  -2  -2  22   44.90   15.50
  -2   2 -22   94.99   21.20
   3   2 -22  221.28   19.80
   3   2 -22  221.28   12.30
   3   2 -22  235.18   33.10
  -3  -2 -22  204.78   15.00
   3  -2 -22  230.28   10.90
   3  -2 -22  224.18   22.00
  -3   2 -22  231.98   15.30
   4   2 -22    7.70   15.20
   4   2 -22   -7.60    7.60
   4  -2 -22   -1.20   11.90
  -4   2 -22   14.10   15.10
  -4  -2  22    4.50    9.70
   4  -2 -22   11.90    7.20
  -4  -2  22   16.80   13.70
  -5   2  22  176.88   18.60
   5   2 -22  195.18   13.60
   5  -2 -22  142.09   10.00
  -5   2 -22  178.48   25.70
  -5  -2  22  184.18   17.10
  -5  -2  22  144.49   21.00
   6   2 -22  191.58   13.30
  -6   2  22  244.08   30.00
  -6   2  22  193.88   17.60
  -6  -2  22  201.88   17.60
  -6  -2  22  204.18   21.80
   6  -2 -22  185.08   10.60
  -6   2 -22  272.87   25.70
   7   2 -22    4.50    6.20
  -7   2  22   16.70   13.80
  -7   2  22    8.60    9.40
  -7  -2  22    2.90    8.60
  -7  -2  22    3.80   10.00
   0   3  22   -7.00   14.70
   0   3 -22   34.80   15.00
   0   3 -22   38.60   11.10
   0   3 -22   41.20   22.10
   0  -3 -22   32.40    6.10
   0  -3 -22   32.30    9.40
   0  -3 -22   43.50   12.80
  -1   3  22  560.74   55.49
  -1  -3 -22  398.46   22.60
   1   3 -22  414.16   23.10
   1   3 -22  375.56   33.60
  -1  -3 -22  350.56   12.40
   1   3 -22  390.86   19.60
  -1  -3 -22  387.36   17.00
  -1   3 -22  426.66   25.00
  -1   3 -22  412.16   36.00
   1  -3 -22  396.36   18.30
  -1   3 -22  419.16   20.10
   1  -3 -22  401.86   21.80
   1  -3 -22  415.76   13.50
   2   3 -22  393.26   34.30
  -2  -3 -22  378.66   18.00
  -2  -3 -22  369.86   21.90
   2   3 -22  376.56   14.50
   2   3 -22  369.96   25.20
   2   3 -22  385.96   18.60
  -2   3 -22  405.86   34.60
   2  -3 -22  430.76   22.20
  -2   3 -22  407.46   19.50
   2  -3 -22  396.76   13.80
   3   3 -22  216.08   13.20
   3   3 -22  259.97   24.60
   3   3 -22  219.78   35.70
  -3   3 -22  237.98   17.70
   3  -3 -22  260.67   13.10
  -3  -3  22  295.87   21.70
   3  -3 -22  283.67   21.80
   4   3 -22    6.30   15.70
   4   3 -22    4.90    7.70
   4  -3 -22    5.80    6.80
  -4   3 -22   16.20   16.00
  -4  -3  22  -10.90   13.70
   5   3 -22   90.29   17.00
  -5   3  22   84.09   11.80
   5   3 -22   82.59   12.60
   5  -3 -22   57.79    8.80
  -5  -3  22   90.69   15.70
  -5   3 -22   79.49   16.10
  -6   3  22   38.90   17.80
   6   3 -22   39.40    8.00
  -6   3  22   26.30   11.00
  -6   3 -22   48.30   15.20
   6  -3 -22   20.30    5.20
  -6  -3  22   31.10   12.80
  -7   3  22   99.29   14.90
   7   3 -22   93.09    9.10
  -7   3  22  106.89   13.70
  -7  -3  22   59.59   10.70
   0   4 -22  930.21   29.70
   0   4 -22  947.51   49.90
   0   4 -22  920.31   35.00
   0  -4 -22  999.20   24.00
   0  -4 -22  921.51   32.30
  -1  -4 -22  223.18   11.50
   1   4 -22  255.67   19.50
  -1  -4 -22  244.28   21.20
   1   4 -22  247.98   24.60
   1   4 -22  224.18   33.50
   1  -4 -22  276.37   22.00
  -1   4 -22  283.07   23.30
  -1   4 -22  305.87   20.80
  -1   4 -22  276.77   37.00
   1  -4 -22  274.47   11.40
   2   4 -22  171.28   10.70
  -2  -4 -22  162.58   19.80
   2   4 -22  201.48   22.90
   2   4 -22  160.68   34.30
   2   4 -22  180.98   17.30
  -2   4 -22  188.88   17.30
  -2  -4  22  177.98   21.40
   2  -4 -22  182.48   20.30
   2  -4 -22  209.38   12.50
   3   4 -22  133.39   28.00
   3   4 -22  133.19   12.50
   3   4 -22  143.69   22.60
   3  -4 -22  109.89    9.90
  -3  -4  22  139.89   20.10
  -3   4 -22  126.79   18.00
   3  -4 -22  110.09   18.70
   4   4 -22  142.59   13.60
   4   4 -22  159.78   25.10
   4  -4 -22  142.29   10.60
  -4  -4  22  128.19   21.90
  -5   4  22   81.29   11.00
   5   4 -22   77.79   11.80
   5   4 -22   53.99   15.90
  -5  -4  22   83.09   14.30
   5  -4 -22   76.69    8.70
   6   4 -22   44.20    7.80
  -6   4  22   41.60   15.70
  -6   4  22   40.60    9.90
  -6  -4  22   26.60   11.50
  -7   4  22   11.20   11.90
   7   4 -22    0.20    5.30
  -7  -4  22   10.10    8.90
   0   5 -22  206.38   21.90
   0  -5 -22  188.28   22.10
   0   5 -22  184.08   32.50
   0  -5 -22  169.08   12.00
   0   5 -22  189.78   24.00
   1   5 -22   71.29   18.80
  -1  -5 -22   62.99    8.40
   1   5 -22   56.49   14.30
   1   5 -22   45.00   27.80
  -1   5 -22   58.19   26.50
   1  -5 -22   61.09   16.90
   1  -5 -22   71.99    8.80
  -1   5 -22  106.09   20.40
   2   5 -22  178.98   26.80
   2   5 -22  154.28   19.40
   2   5 -22  131.49   29.20
   2   5 -22  157.08   12.50
   2  -5 -22  192.78   12.40
  -2  -5  22  179.78   21.30
   2  -5 -22  195.78   21.20
  -2   5 -22  219.18   20.40
   3   5 -22   25.40    8.80
   3   5 -22   39.50   18.80
  -3  -5  22   19.40   12.60
  -3   5 -22   31.70   11.60
   3  -5 -22   38.80    7.30
   4   5 -22   51.99    8.80
   4   5 -22   41.60   17.40
  -4  -5  22   21.20   12.40
   4  -5 -22   43.90    6.80
   5   5 -22   35.70    8.00
  -5   5  22   70.99   17.40
   5   5 -22   46.30   15.40
   5  -5 -22   36.70    5.70
  -5  -5  22   24.90   11.90
  -6   5  22   26.10   13.40
   6   5 -22   39.10    7.00
  -6  -5  22   38.00   10.20
   0   6 -22    7.70   15.80
   0   6 -22    0.80   15.10
   0  -6 -22   -1.00    7.20
   1   6 -22  239.58   27.40
   1   6 -22  249.08   21.50
  -1   6 -22  271.67   21.00
   1  -6 -22  255.87   13.50
   2   6 -22   -2.60    7.50
   2   6 -22   -0.60   12.00
   2   6 -22   23.30   18.10
   2  -6 -22    3.80    6.90
  -2   6 -22    8.80   13.40
   3   6 -22   63.69    8.60
   3   6 -22   36.00   18.80
  -3   6 -22   52.09   11.80
   3  -6 -22   66.89    9.90
   4   6 -22   64.29   16.40
   4   6 -22   90.49   11.10
   4  -6 -22   74.09    8.40
  -4  -6  22   60.89   10.70
  -5   6  22   61.49   13.20
   5   6 -22   77.39    9.50
   5   6 -22   75.19   13.40
  -5  -6  22   69.79    9.90
   0   7 -22   12.70   13.50
   0   7 -22    6.10   16.30
   1   7 -22   16.00   16.80
   1   7 -22    4.40   12.10
  -1   7 -22   22.20   14.50
   2   7 -22   19.30   11.30
   2   7 -22   39.80   17.90
  -2   7 -22   32.80   12.80
   2  -7 -22   21.20    6.80
   3   7 -22   21.00    6.60
   3   7 -22   11.00   15.90
  -3   7 -22   21.30   10.20
   3  -7 -22   41.40    6.00
   4   7 -22   20.50   13.80
   4   7 -22   26.10    6.00
   0   8 -22    4.00   12.90
   0   8 -22   19.50   11.20
   1   8 -22  106.09   15.20
   1   8 -22  114.79   20.80
  -1   8 -22  152.58   17.00
   2   8 -22  181.28   20.20
   2   8 -22  139.09   14.60
  -2   8 -22  154.78   13.60
   3   8 -22   -1.30   11.40
   0   0 -23  -22.90   17.10
   0   0 -23    0.90    9.80
   1   0 -23   76.69   15.00
   1   0 -23   88.79   21.00
  -1   0 -23   80.69   13.90
   1   0  23   92.79   20.20
   1   0 -23   84.39   13.30
  -1   0  23   74.49   16.10
  -2   0  23   31.80   16.60
   2   0 -23   27.50   22.10
   2   0 -23   22.80    6.00
  -2   0 -23    9.00    8.30
   2   0  23   14.50   15.00
   2   0 -23   11.50   10.80
   2   0 -23   16.50    7.30
   3   0 -23  194.38   19.50
  -3   0 -23  185.08   15.30
   3   0 -23  187.98   10.60
   4   0 -23  256.37   22.80
  -4   0  23  299.37   20.70
   4   0 -23  264.57   12.20
  -5   0  23  117.49   15.00
  -5   0  23  126.89   17.00
   5   0 -23  115.89   11.50
  -6   0  23    6.50   10.30
   6   0 -23   15.10    7.30
  -6   0  23   -7.80   10.90
  -7   0  23  229.58   16.70
   7   0 -23  194.28    9.60
   0  -1 -23  342.67   15.50
   0  -1 -23  324.57   22.00
   0   1 -23  335.77   18.60
   0   1 -23  328.67   23.70
   0  -1  23  360.86   28.90
   0   1 -23  351.86   29.90
   0   1  23  328.07   25.70
   1   1 -23  260.37   19.40
  -1  -1 -23  260.57   16.00
   1   1 -23  264.97   16.30
   1  -1  23  249.48   27.50
  -1   1  23  246.18   26.10
  -1  -1 -23  265.97   20.60
   1   1 -23  294.27   32.30
   1  -1 -23  276.07   15.80
   1  -1 -23  264.37   11.80
  -1   1 -23  257.47   29.80
  -1  -1  23  297.77   25.20
   1  -1 -23  282.27   18.60
  -1   1 -23  249.18   15.80
   2   1 -23  163.18   27.10
   2   1 -23  162.08   21.30
   2  -1  23  187.28   26.60
  -2  -1 -23  144.59   13.40
  -2   1  23  146.09   23.30
   2   1 -23  151.88   12.90
   2   1 -23  148.89   10.40
   2  -1 -23  147.79   10.40
   2  -1 -23  145.99   12.10
   2   1  23  162.88   26.30
  -2   1 -23  142.69   15.80
   2  -1 -23  151.88   17.30
  -2  -1  23  131.39   20.40
  -2   1 -23  208.68   28.70
   3   1 -23  330.47   33.10
   3   1 -23  261.87   23.00
   3   1 -23  260.97   11.40
  -3  -1 -23  268.87   16.00
   3  -1 -23  395.06   13.80
   3  -1 -23  413.36   24.10
  -3   1 -23  381.86   19.20
  -4   1  23   17.90   12.50
   4   1 -23    1.40    6.80
   4   1 -23   16.00   14.40
  -4  -1  23   11.40   10.70
   4  -1 -23    6.80    6.50
  -4  -1  23   10.80   12.30
   4  -1 -23   -1.10   11.60
  -5   1  23   13.50   11.10
   5   1 -23   -0.20    8.00
  -5  -1  23   11.40   12.30
   5  -1 -23    7.00    7.00
  -5  -1  23   -4.40   11.00
  -6   1  23   22.80   11.60
   6   1 -23   12.20    7.50
  -6   1  23    8.10   15.70
  -6  -1  23    6.60   10.60
  -6  -1  23   18.20   11.80
   6  -1 -23   20.40    6.80
   7   1 -23    8.40    5.80
  -7   1  23   -1.20    9.40
   7  -1 -23   10.60    5.00
  -7  -1  23   17.90   10.20
  -7  -1  23    9.70    9.40
   0   2 -23   12.00   19.70
   0  -2 -23   18.60    6.00
   0  -2 -23   13.80    8.80
   0  -2 -23   15.10   12.80
   0   2  23  -14.90   14.60
   0   2 -23   21.50   12.40
   0   2 -23    9.50    9.50
   1   2 -23   28.10   12.30
   1   2 -23    6.20   19.40
   1  -2  23   24.60   16.20
  -1  -2 -23   22.50    8.60
   1   2 -23   26.10    9.60
  -1   2  23    9.40   14.80
  -1  -2 -23   42.40   13.80
  -1   2 -23   14.00   10.80
   1  -2 -23   19.70    6.70
   1  -2 -23   27.90   13.70
  -1   2 -23   41.30   20.10
   1  -2 -23   21.30    8.50
  -1   2 -23   29.40   13.50
   2   2 -23   74.39   14.00
   2   2 -23  109.79   20.40
  -2  -2 -23   79.89   13.60
   2   2 -23   74.79    8.30
   2   2 -23  102.19   26.00
  -2  -2 -23   77.39   13.70
  -2   2 -23   75.59   14.20
   2  -2 -23   81.09    9.80
   2  -2 -23  103.49   13.00
  -2   2 -23  141.29   27.20
   2  -2 -23  102.09   17.70
   3   2 -23  472.85   25.10
   3   2 -23  465.25   15.10
   3   2 -23  485.15   39.00
  -3  -2 -23  448.96   19.20
   3  -2 -23  433.16   14.90
   3  -2 -23  438.36   24.30
  -3   2 -23  441.26   20.70
   4   2 -23  261.97   13.40
   4   2 -23  291.27   24.90
  -4  -2  23  310.67   18.00
   4  -2 -23  260.37   22.40
  -4  -2  23  301.27   23.30
   4  -2 -23  278.17   13.50
  -5   2  23  407.26   20.50
   5   2 -23  419.56   16.10
  -5  -2  23  467.85   21.50
   5  -2 -23  461.35   15.40
  -5  -2  23  443.36   24.40
   6   2 -23   28.00    7.60
  -6   2  23   15.90   16.90
  -6   2  23   24.90   10.50
  -6  -2  23   31.40   10.40
  -6  -2  23   22.60   12.80
   6  -2 -23   25.40    6.30
  -7   2  23   96.59   15.20
   7   2 -23   97.29    8.50
  -7   2  23  101.99   14.20
  -7  -2  23   95.99   12.80
  -7  -2  23   69.99   10.70
   0   3 -23   12.80   11.00
   0  -3 -23   18.50    6.00
   0   3 -23   22.40   14.60
   0  -3 -23   15.60    8.50
   0  -3 -23   13.40   13.40
   0   3 -23   30.80   21.60
   1   3 -23   19.00   10.60
   1   3 -23    1.20   14.60
  -1  -3 -23   12.20   12.00
  -1  -3 -23    6.30    6.00
   1   3 -23   13.30   23.60
  -1  -3 -23   18.10    9.70
  -1   3 -23    9.50   12.90
  -1   3 -23   -9.70   18.80
   1  -3 -23    7.50    8.20
  -1   3 -23   13.30   11.30
   1  -3 -23   34.60   14.60
   1  -3 -23   12.50    6.50
   2   3 -23   65.69   10.00
   2   3 -23   68.89   24.00
  -2  -3 -23   59.89   14.00
  -2  -3 -23   60.99   10.40
   2   3 -23   55.69   14.50
   2   3 -23   84.49   12.20
   2  -3 -23   67.89    9.00
   2  -3 -23   76.79   15.40
  -2   3 -23   54.69   12.20
  -2   3 -23   59.09   24.70
   3   3 -23 1031.60   37.90
   3   3 -23 1003.20   26.10
   3   3 -23 1000.10   49.00
  -3  -3  23  907.81   30.70
   3  -3 -23  959.60   32.80
  -3   3 -23  952.40   29.40
   3  -3 -23  987.60   24.60
   4   3 -23   13.50    8.80
   4   3 -23   22.60   16.70
   4  -3 -23   -0.50   17.00
  -4  -3  23   11.60   13.80
   4  -3 -23   11.60    6.80
  -5   3  23   14.70   10.70
   5   3 -23   10.20   14.70
   5   3 -23   12.10    8.30
   5  -3 -23    9.40    6.40
  -5  -3  23   -3.30   13.80
   6   3 -23   57.39    8.60
  -6   3  23   37.40   16.30
  -6   3  23   58.19   11.60
  -6  -3  23   53.99   12.80
   6  -3 -23   53.79    7.80
  -7   3  23   14.10    7.50
  -7   3  23   16.40   11.70
   7   3 -23   15.30    5.50
  -7  -3  23   12.30    9.80
   0  -4 -23   18.10    7.10
   0   4 -23   25.70   12.90
   0  -4 -23    9.70   13.30
   0   4 -23   25.50   16.20
   0   4 -23    7.30   25.80
   1   4 -23   56.89   13.00
   1   4 -23   46.40   16.00
   1   4 -23   64.69   25.90
  -1  -4 -23   65.49    7.70
  -1  -4 -23   49.30   14.10
  -1   4 -23   55.59   15.40
  -1   4 -23   40.10   23.00
   1  -4 -23   49.60    6.70
   1  -4 -23   36.60   13.70
  -1   4 -23   59.99   12.80
   2   4 -23   34.70   17.50
   2   4 -23   43.10   26.20
   2   4 -23   24.40    7.50
   2   4 -23   27.70   12.20
   2  -4 -23   34.20   12.70
  -2  -4  23   21.10   12.90
  -2   4 -23   31.50   12.70
   2  -4 -23   25.10    7.30
   3   4 -23   59.69   26.10
   3   4 -23   87.99   12.30
   3   4 -23  104.79   19.50
   3  -4 -23   94.59   15.10
   3  -4 -23   74.39    9.60
  -3   4 -23   64.79   12.80
  -3  -4  23   93.29   14.00
   4   4 -23   91.99   12.60
   4   4 -23   87.49   18.10
  -4  -4  23   69.39   13.30
   4  -4 -23   74.59   10.10
  -5   4  23  110.89   15.10
   5   4 -23  107.59   12.00
   5   4 -23  108.89   22.90
  -5  -4  23  158.48   20.60
   5  -4 -23  112.69    8.40
   6   4 -23   -9.50    6.40
  -6   4  23   -6.60   14.70
  -6   4  23   -5.70    9.00
  -6  -4  23    5.50   11.70
  -7   4  23   80.79   11.30
   7   4 -23  101.39    8.00
  -7  -4  23   83.09   11.40
   0   5 -23  121.39   21.10
   0  -5 -23   74.99   16.50
   0  -5 -23   69.09    9.50
   0   5 -23   28.90   27.50
   0   5 -23   75.49   18.40
  -1  -5 -23   30.80    7.40
   1   5 -23   33.30   18.20
   1   5 -23   14.40   25.00
   1   5 -23   45.70   13.00
   1  -5 -23   55.59    7.70
   1  -5 -23   44.10   14.30
  -1   5 -23   87.19   18.10
  -1   5 -23    1.30   23.00
   2   5 -23   17.30   27.70
   2   5 -23   66.69   19.40
   2   5 -23   53.79   12.20
   2   5 -23   59.19    8.20
   2  -5 -23   26.50    7.40
   2  -5 -23   44.60   13.50
  -2   5 -23   51.09   14.40
  -2  -5  23   48.80   13.00
   3   5 -23  221.18   27.90
   3   5 -23  246.98   13.10
   3  -5 -23  225.28   11.90
  -3   5 -23  210.08   18.70
  -3  -5  23  153.38   20.20
   4   5 -23   29.40   18.00
   4   5 -23    7.70    8.30
  -4  -5  23   20.40   12.00
   4  -5 -23   -4.90    6.10
   5   5 -23   19.00    8.20
  -5   5  23   -3.10   14.50
   5   5 -23    3.30   13.20
   5  -5 -23   20.60    5.10
  -5  -5  23   22.40   11.50
   6   5 -23    8.90    5.80
  -6   5  23   13.50   11.90
  -6  -5  23   13.70    9.30
   0  -6 -23    4.10    7.20
   0   6 -23    7.50   16.80
   0   6 -23   33.40   14.70
   1   6 -23   23.00   18.20
   1   6 -23   26.40   13.30
  -1   6 -23   46.00   14.80
   1  -6 -23    2.60    7.20
   2   6 -23   49.20   19.40
   2   6 -23   33.80   11.60
   2  -6 -23   47.60    7.80
  -2   6 -23   95.79   19.50
   3   6 -23  122.99   19.60
   3   6 -23  124.59   11.30
  -3   6 -23  122.09   16.90
   3  -6 -23   98.39   10.00
   4   6 -23   11.50    7.50
   4   6 -23   -1.30   15.40
   4  -6 -23    7.10    5.30
  -4  -6  23    1.90    9.40
  -5   6  23   80.89   12.90
   5   6 -23   69.29   12.20
   5   6 -23   81.49    9.30
  -5  -6  23   62.89    8.90
   0   7 -23   60.49   14.10
   0   7 -23   37.60   15.70
   1   7 -23   49.60   13.20
   1   7 -23   32.00   17.90
  -1   7 -23   60.09   14.20
   2   7 -23   61.19   11.30
   2   7 -23   66.89   17.50
  -2   7 -23  116.19   18.30
   2  -7 -23  104.09    9.60
   3   7 -23   99.49    9.00
   3   7 -23   84.09   16.40
   3  -7 -23  106.09    8.00
  -3   7 -23   95.69   14.90
   4   7 -23   31.40    5.90
   4   7 -23   21.20   11.60
   0   8 -23  220.28   16.60
   0   8 -23  162.78   19.90
   1   8 -23   33.90   12.90
   1   8 -23   30.40    9.50
  -1   8 -23   52.89   10.10
   2   8 -23   56.89   12.70
  -2   8 -23   65.69   12.00
   0   0 -24  359.66   17.00
   0   0 -24  398.16   20.60
   1   0 -24   92.09   12.40
   1   0 -24   95.09   18.80
   1   0 -24  107.39    8.20
   1   0  24   78.69   18.40
  -1   0  24  132.69   20.60
  -1   0 -24   88.39   12.70
   1   0 -24  106.69   23.40
  -1   0 -24  100.09   18.30
   2   0 -24  126.99   13.60
   2   0 -24  146.39   20.00
   2   0 -24  134.89    9.50
  -2   0 -24  143.49   15.40
   3   0 -24 1157.58   28.30
   3   0 -24 1170.38   36.80
  -3   0 -24 1176.38   32.10
  -4   0  24  811.22   29.20
   4   0 -24  827.32   22.30
   4   0 -24  824.12   30.50
  -5   0  24    2.70   10.10
  -5   0  24   18.20   12.60
   5   0 -24   13.90    7.30
  -6   0  24  368.46   19.20
   6   0 -24  354.26   14.10
  -6   0  24  346.57   20.20
   7   0 -24   15.50    5.40
  -7   0  24   10.40    8.90
   0  -1 -24   48.90   10.40
   0  -1 -24   55.59   13.30
   0   1 -24   54.89   10.70
   0   1 -24   72.89   15.00
   0   1 -24   48.80   20.30
   0  -1  24   48.80   17.20
  -1  -1 -24  135.39   19.80
  -1  -1 -24  129.29   15.10
  -1   1  24  145.79   21.40
   1   1 -24  132.89   18.10
   1   1 -24  102.79    9.40
   1   1 -24  141.79   26.20
   1  -1  24  136.19   23.30
   1   1 -24  128.49   14.30
  -1   1 -24  155.98   31.90
   1  -1 -24  129.89   13.50
  -1   1 -24  126.79   18.00
   1  -1 -24  127.09    8.60
  -1   1 -24  130.39   13.80
   1  -1 -24  137.99   19.50
   2   1 -24  219.68   22.40
  -2  -1 -24  194.78   14.50
   2   1 -24  199.18   11.50
   2   1 -24  260.67   29.60
   2   1 -24  194.68   13.30
   2  -1 -24  217.48   21.20
  -2   1 -24  221.88   16.70
   2  -1 -24  203.58   13.30
   2  -1 -24  214.08   10.40
  -3  -1 -24  154.28   14.40
   3   1 -24  156.38   10.80
   3   1 -24  183.88   22.00
   3   1 -24  188.88   31.70
  -3   1 -24  116.69   15.40
   3  -1 -24  123.69    9.70
   3  -1 -24  179.78   21.80
   4   1 -24  105.99   20.10
  -4   1  24  124.09   18.10
   4   1 -24  117.39   12.10
  -4  -1  24  115.89   14.70
   4  -1 -24  110.09   19.40
   4  -1 -24  110.39   11.30
  -4  -1  24  144.09   21.00
  -5   1  24  156.38   18.30
   5   1 -24  111.49   12.40
  -5  -1  24  123.69   20.60
  -5  -1  24  131.49   18.10
   5  -1 -24  130.39   11.40
   6   1 -24    7.90    7.20
  -6   1  24   -6.10   14.90
  -6   1  24    8.40   11.00
  -6  -1  24    5.80   10.50
   6  -1 -24    6.40    6.20
  -6  -1  24   15.10   11.60
  -7   1  24   59.19    9.50
   7   1 -24   70.29    8.50
   7  -1 -24   66.79    6.90
  -7  -1  24   79.49    9.70
  -7  -1  24   71.29    9.70
   0  -2 -24  627.04   26.90
   0   2 -24  658.93   39.00
   0   2 -24  643.04   27.20
   0  -2 -24  626.74   17.40
   0  -2 -24  609.04   22.00
   0   2  24  568.94   32.50
   0   2 -24  616.24   23.20
   1   2 -24  262.57   16.70
  -1  -2 -24  281.07   16.80
  -1  -2 -24  283.97   21.70
   1   2 -24  274.07   35.70
   1   2 -24  270.97   23.60
   1  -2  24  249.97   29.00
   1  -2 -24  240.58   10.70
  -1   2 -24  228.48   20.50
   1  -2 -24  241.38   22.50
  -1   2 -24  263.27   18.20
   1  -2 -24  241.68   15.40
  -1   2 -24  288.67   30.80
  -2  -2 -24  127.59   18.70
  -2  -2 -24  109.49   13.50
   2   2 -24  127.79   21.70
   2   2 -24  120.09   15.20
   2   2 -24  139.39   29.60
   2   2 -24  112.29   10.10
   2  -2 -24   96.39   11.80
   2  -2 -24  121.29   18.40
  -2   2 -24  137.39   26.50
   2  -2 -24  121.99    9.40
  -2   2 -24   92.29   14.40
   3   2 -24  110.09   19.30
   3   2 -24   88.99   10.60
  -3  -2 -24  104.99   13.90
   3   2 -24  162.58   32.50
   3  -2 -24  120.69   10.90
   3  -2 -24  137.29   20.20
  -3   2 -24  112.49   15.90
   4   2 -24  343.17   14.20
   4   2 -24  316.57   25.50
   4  -2 -24  308.67   12.80
   4  -2 -24  334.07   23.70
  -4  -2  24  298.57   18.50
  -4  -2  24  289.07   23.30
   5   2 -24  121.09   20.40
  -5   2  24  144.19   17.40
   5   2 -24  158.48   13.20
  -5  -2  24  173.08   22.00
  -5  -2  24  180.18   17.70
   5  -2 -24  178.08   11.80
   6   2 -24  174.48   11.90
  -6   2  24  166.78   27.20
  -6   2  24  198.48   17.50
   6  -2 -24  151.08    9.20
  -6  -2  24  124.09   20.10
  -6  -2  24  151.28   15.60
   7   2 -24   -0.30    5.40
  -7   2  24    4.60    8.30
  -7   2  24    1.20   10.90
  -7  -2  24    0.50    9.00
  -7  -2  24    8.80    7.50
   0  -3 -24   13.20   14.00
   0  -3 -24   44.90    6.50
   0   3 -24   29.00   14.40
   0   3 -24   29.60   10.80
   0   3 -24   24.80   23.70
   0  -3 -24   29.30    9.80
   1   3 -24   99.79   17.80
   1   3 -24  130.39   26.80
  -1  -3 -24   90.49   15.50
  -1  -3 -24   88.59   13.30
   1   3 -24   88.19   15.80
   1  -3 -24  118.39   14.00
  -1   3 -24  119.89   15.80
  -1   3 -24  108.99   20.80
   1  -3 -24  118.59   18.50
   1  -3 -24  112.09   10.00
  -1   3 -24  133.69   27.60
   2   3 -24   95.49    9.50
  -2  -3 -24   90.49   14.60
   2   3 -24  120.69   24.70
   2   3 -24  116.79   28.60
   2   3 -24   87.29   15.10
  -2  -3 -24   94.79   19.80
   2  -3 -24   93.99   15.50
  -2   3 -24   91.09   16.80
   2  -3 -24   78.29    9.10
   3   3 -24  336.47   25.70
   3   3 -24  308.67   13.50
  -3   3 -24  340.87   20.60
   3  -3 -24  355.16   23.60
  -3  -3  24  324.27   24.80
   3  -3 -24  354.76   14.50
   4   3 -24   20.80    7.50
   4   3 -24   18.40   15.30
   4  -3 -24   21.10    6.90
   4  -3 -24   32.80   13.50
  -4  -3  24   18.00   13.80
  -5   3  24   33.90   10.80
   5   3 -24   37.70   14.80
   5   3 -24   34.00    8.50
   5  -3 -24   39.60    7.10
  -5  -3  24   44.80   14.90
   6   3 -24   28.50    7.40
  -6   3  24   49.50   16.10
  -6   3  24   33.90   10.40
  -6  -3  24   20.60   11.90
   6  -3 -24   24.60    5.30
   7   3 -24  180.58    8.60
  -7   3  24  157.68   16.60
  -7   3  24  160.78   11.40
  -7  -3  24  171.98   14.40
   0   4 -24  506.15   38.30
   0   4 -24  514.95   22.50
   0   4 -24  491.75   27.80
   0  -4 -24  500.05   15.80
   0  -4 -24  527.75   24.60
   1   4 -24  212.78   26.40
   1   4 -24  167.98   35.70
  -1  -4 -24  235.58   11.40
   1   4 -24  194.48   19.00
  -1  -4 -24  181.18   21.10
   1  -4 -24  221.28   11.40
   1  -4 -24  186.28   23.00
  -1   4 -24  227.38   20.50
  -1   4 -24  163.68   22.70
  -1   4 -24  206.98   35.40
   2   4 -24    4.00    6.90
   2   4 -24    5.20   23.30
   2   4 -24   16.80   17.80
   2   4 -24   -1.70   10.90
  -2   4 -24    7.50   11.40
   2  -4 -24    4.30    6.80
  -2  -4  24   11.40   13.50
   2  -4 -24    9.40   14.50
   3   4 -24   30.90   24.80
   3   4 -24   39.10   17.40
   3   4 -24   19.90    8.00
  -3  -4  24   23.50   12.70
   3  -4 -24   15.10   12.80
   3  -4 -24   20.30    7.70
  -3   4 -24   13.90   11.10
   4   4 -24    5.40    8.60
   4   4 -24    8.70   16.10
  -4  -4  24    9.20   12.70
   4  -4 -24    1.40    6.50
  -5   4  24  205.98   16.10
   5   4 -24  210.48   23.00
   5   4 -24  234.48   12.50
   5  -4 -24  205.58    9.40
  -5  -4  24  200.08   21.30
  -6   4  24  138.99   14.10
  -6   4  24  130.49   16.10
   6   4 -24  132.09   10.80
   6  -4 -24  102.99    6.90
  -6  -4  24  106.39   17.70
   0   5 -24   91.89   18.70
   0   5 -24   83.69   14.30
   0  -5 -24   56.59   15.00
   0  -5 -24   83.39   10.90
   0   5 -24   65.29   25.10
   1   5 -24   42.20   28.70
   1   5 -24   21.60   12.60
   1   5 -24   42.50   17.50
  -1  -5 -24   33.30    7.30
  -1   5 -24    8.40   22.90
   1  -5 -24   38.50   15.20
  -1   5 -24   68.39   15.60
   1  -5 -24   16.60    7.60
   2   5 -24   96.99   18.70
   2   5 -24  115.09   20.80
   2   5 -24  100.69   11.80
  -2  -5  24   97.99   13.30
   2  -5 -24   72.29   13.90
  -2   5 -24   62.89   12.70
   2  -5 -24   80.29   10.50
   3   5 -24   25.20   17.50
   3   5 -24   22.80    8.30
   3  -5 -24   29.70    7.70
  -3  -5  24   29.30   12.80
  -3   5 -24   10.00   11.60
   4   5 -24    4.70   15.80
   4   5 -24   27.70    7.80
  -4  -5  24   16.60   11.80
   4  -5 -24   12.50    5.80
  -5   5  24   91.59   16.20
   5   5 -24   88.99    9.70
   5   5 -24   62.79   14.00
  -5  -5  24   88.69   12.20
   5  -5 -24   95.89    7.20
   6   5 -24   12.70    5.50
  -6   5  24    3.90   10.10
  -6  -5  24  -11.10    8.30
   0   6 -24  456.35   24.90
   0  -6 -24  441.06   15.20
   0   6 -24  403.66   27.00
   1   6 -24  143.79   20.10
   1   6 -24  151.08   27.90
   1  -6 -24  117.39   10.70
  -1   6 -24  133.19   21.10
   2   6 -24   87.99   17.50
   2   6 -24  139.79   26.20
  -2   6 -24  109.79   19.10
   2  -6 -24  101.79   10.70
   3   6 -24   30.30    7.30
   3   6 -24   47.80   17.60
   3  -6 -24   44.50    6.60
  -3   6 -24   42.80   11.30
   4   6 -24   42.60   14.20
   4   6 -24   40.10    7.30
  -4  -6  24   43.30    9.60
   4  -6 -24   35.30    5.50
  -5   6  24  106.89   16.20
   5   6 -24   64.89   10.90
   5   6 -24  109.59    8.80
  -5  -6  24   79.89   11.10
   0   7 -24   24.40   12.60
   0   7 -24   -7.50   13.70
   1   7 -24  145.29   24.50
   1   7 -24  172.28   16.80
  -1   7 -24  207.08   19.40
   2   7 -24    8.40    9.60
   2   7 -24   21.30   15.80
  -2   7 -24   13.30   11.00
   3   7 -24   52.19   15.70
  -3   7 -24   23.10    8.50
   4   7 -24   23.90   10.40
   0   8 -24   46.70    9.70
   1   8 -24   12.20   12.20
   1   8 -24   19.30    7.50
  -1   8 -24   41.80    9.30
   2   8 -24    9.50   11.20
  -2   8 -24    1.50    7.20
   0   0 -25   13.40   13.50
   0   0 -25   -1.90    8.80
  -1   0 -25  231.68   20.20
  -1   0  25  243.88   26.40
   1   0 -25  250.27   19.30
  -1   0 -25  226.78   15.00
   1   0 -25  231.38   10.30
   1   0 -25  233.48   15.90
   2   0 -25  161.68    9.70
   2   0 -25  196.48   19.00
  -2   0 -25  166.18   15.60
   2   0 -25  181.38   12.80
   3   0 -25    7.50    6.40
   3   0 -25   -4.10   13.20
  -3   0 -25    2.90   10.10
  -4   0  25  599.34   25.10
   4   0 -25  586.24   18.50
   4   0 -25  579.24   26.40
   5   0 -25   12.70    7.70
  -5   0  25   17.10   12.40
  -5   0  25   23.90   11.20
   6   0 -25  149.29   10.90
  -6   0  25  149.39   17.90
  -6   0  25  124.79   17.50
  -7   0  25  341.77   15.70
   7   0 -25  301.97   10.70
   0   1 -25  134.09   15.00
   0  -1  25   96.29   18.40
   0   1 -25  145.19   20.60
   0  -1 -25  131.19   21.00
   0  -1 -25  133.79   13.20
   0   1 -25  164.48   27.40
  -1  -1 -25   37.50    9.50
   1   1 -25   43.00    6.70
   1   1 -25   36.30   14.60
   1   1 -25   55.79   11.20
  -1  -1 -25   53.19   13.30
   1   1 -25   60.09   22.80
  -1   1 -25   47.10   10.40
   1  -1 -25   60.59    8.20
   1  -1 -25   41.70   13.30
  -1   1 -25   46.60   14.40
  -1   1 -25   56.49   24.10
   1  -1 -25   47.40    9.40
   2   1 -25   57.79   22.20
   2   1 -25   45.90    6.70
  -2  -1 -25   63.09   10.90
   2   1 -25   53.29    9.80
   2   1 -25   42.60   14.90
  -2   1 -25  102.79   14.40
   2  -1 -25   96.39    9.00
   2  -1 -25   67.99   13.80
   2  -1 -25   88.69   12.70
   3   1 -25  509.55   36.50
   3   1 -25  465.15   26.10
  -3  -1 -25  422.16   19.20
   3   1 -25  431.86   14.90
  -3   1 -25  446.96   19.90
   3  -1 -25  495.15   25.90
   3  -1 -25  434.16   15.70
   4   1 -25  208.68   22.80
  -4   1  25  226.28   20.40
   4   1 -25  243.88   13.30
   4  -1 -25  215.78   11.50
   4  -1 -25  241.98   21.80
  -4  -1  25  185.78   18.00
  -4  -1  25  214.38   22.70
   5   1 -25   10.00    7.70
  -5   1  25   15.20   11.00
  -5  -1  25    7.60   12.50
   5  -1 -25   10.60    6.70
  -5  -1  25    8.30   10.80
  -6   1  25  138.99   24.10
   6   1 -25  179.98   11.60
  -6   1  25  186.18   17.90
   6  -1 -25  156.58   10.70
  -6  -1  25  167.68   16.80
  -6  -1  25  157.18   19.00
   7   1 -25   20.10    5.00
  -7   1  25   23.50    8.70
  -7  -1  25   33.10    8.60
  -7  -1  25   23.50    8.40
   7  -1 -25   26.30    4.20
   0  -2 -25  134.09   14.70
   0  -2 -25  119.39   16.50
   0   2 -25  143.39   27.80
   0  -2 -25  102.99    9.00
   0   2 -25  131.59   17.10
   0   2 -25  116.59   21.20
   1   2 -25  319.97   33.10
  -1  -2 -25  300.87   21.40
  -1  -2 -25  302.77   17.60
   1   2 -25  308.07   22.80
   1   2 -25  333.47   18.70
  -1   2 -25  309.67   35.10
  -1   2 -25  326.17   18.30
   1  -2 -25  315.87   22.70
   1  -2 -25  307.07   17.80
   1  -2 -25  317.17   13.10
  -1   2 -25  321.67   22.70
   2   2 -25   54.49   23.80
  -2  -2 -25   50.09   13.40
  -2  -2 -25   32.30    9.90
   2   2 -25   24.80    6.80
   2   2 -25   20.90    9.60
   2   2 -25   40.20   13.40
   2  -2 -25   47.20    9.40
  -2   2 -25   42.80   11.90
  -2   2 -25   58.59   21.90
   2  -2 -25   33.70   13.70
   2  -2 -25   41.00    7.70
   3   2 -25  271.97   34.60
   3   2 -25  241.78   24.60
  -3  -2 -25  230.68   15.80
   3   2 -25  231.18   12.80
   3  -2 -25  272.57   22.50
   3  -2 -25  279.77   13.50
  -3   2 -25  274.77   18.10
   4   2 -25  314.97   13.90
   4   2 -25  307.17   24.40
   4  -2 -25  298.27   22.70
  -4  -2  25  313.77   19.70
   4  -2 -25  324.07   13.60
  -4  -2  25  315.07   24.20
   5   2 -25   61.09   14.50
  -5   2  25   51.69   11.00
   5   2 -25   62.49    9.00
   5  -2 -25   48.30    7.20
  -5  -2  25   70.29   11.40
  -5  -2  25   52.99   13.30
  -6   2  25   62.09   11.10
   6   2 -25   74.89   10.50
  -6   2  25   75.59   16.30
  -6  -2  25   66.69   12.50
  -6  -2  25   55.39    9.50
   6  -2 -25   58.09    8.20
  -7   2  25  137.79   12.40
   7   2 -25  134.59    8.40
  -7   2  25  149.39   16.10
  -7  -2  25  139.69   13.70
  -7  -2  25  154.28   10.90
   0  -3 -25   27.90   10.50
   0   3 -25   33.70   12.10
   0   3 -25   46.60   15.50
   0   3 -25    4.20   22.40
   0  -3 -25   22.60   13.60
   0  -3 -25   17.60    5.70
  -1  -3 -25  400.96   25.20
   1   3 -25  368.76   18.80
  -1  -3 -25  397.06   20.10
   1   3 -25  397.76   27.10
   1   3 -25  437.16   41.50
  -1   3 -25  378.96   25.90
   1  -3 -25  368.76   22.80
  -1   3 -25  397.46   21.30
  -1   3 -25  358.96   33.90
   1  -3 -25  390.66   13.50
   1  -3 -25  385.46   18.20
   2   3 -25  798.52   26.30
   2   3 -25  799.12   31.30
  -2  -3 -25  807.82   25.20
   2   3 -25  752.92   45.70
   2   3 -25  781.72   21.00
  -2  -3 -25  799.12   29.80
   2  -3 -25  873.31   30.90
  -2   3 -25  872.31   27.60
   2  -3 -25  862.21   22.50
   3   3 -25   14.10    7.40
   3   3 -25    9.00   17.00
   3   3 -25   -3.00   23.20
   3  -3 -25   24.40    7.50
   3  -3 -25    4.70   13.90
  -3  -3  25   15.60   14.00
  -3   3 -25   12.20   11.20
   4   3 -25  294.97   14.10
   4   3 -25  236.58   26.40
   4  -3 -25  275.57   11.50
  -4  -3  25  233.98   24.10
   4  -3 -25  241.08   21.80
   5   3 -25   71.39   14.70
   5   3 -25   78.19   10.60
  -5   3  25   79.09   11.50
  -5  -3  25   84.79   15.90
   5  -3 -25   77.39    8.80
  -6   3  25  123.99   16.30
   6   3 -25  139.89   10.90
  -6   3  25  151.48   14.20
   6  -3 -25  133.79    7.40
  -6  -3  25  126.49   19.00
   7   3 -25   24.70    4.90
  -7  -3  25   15.90    8.30
   0  -4 -25   30.90   14.80
   0  -4 -25   32.70    7.30
   0   4 -25   49.50   14.00
   0   4 -25    8.70   25.20
   0   4 -25   40.90   16.50
   1   4 -25  654.23   31.00
   1   4 -25  609.34   25.60
  -1  -4 -25  598.54   17.70
  -1  -4 -25  666.93   28.40
   1   4 -25  562.34   41.60
   1  -4 -25  608.64   18.60
  -1   4 -25  598.54   29.20
  -1   4 -25  666.63   43.60
  -1   4 -25  631.24   25.40
   2   4 -25    0.40    7.30
   2   4 -25   11.80   17.00
   2   4 -25    7.50   25.50
   2   4 -25   16.80   11.20
  -2   4 -25    5.70   13.50
   2  -4 -25    1.40    6.40
  -2  -4  25    5.50   13.40
   2  -4 -25   11.20   12.40
   3   4 -25   55.99    8.50
   3   4 -25   88.69   19.70
  -3  -4  25   32.50   13.10
   3  -4 -25   82.49   15.30
  -3   4 -25   50.59   12.30
   3  -4 -25   60.39    7.70
   4   4 -25   94.79   11.00
   4   4 -25   82.39   17.20
  -4  -4  25   96.99   13.80
   4  -4 -25   95.59   10.30
  -5   4  25    2.10    9.10
   5   4 -25   21.50    7.50
   5   4 -25   11.20   13.20
   5  -4 -25    6.20    5.00
  -5  -4  25   11.00   11.90
  -6   4  25  197.18   13.40
  -6   4  25  185.98   20.50
   6   4 -25  214.38   10.20
  -6  -4  25  189.78   16.20
   6  -4 -25  173.48    7.40
   0   5 -25  198.98   20.60
   0  -5 -25  209.78   11.90
   0   5 -25  172.68   23.50
   1   5 -25  219.68   21.10
   1   5 -25  236.48   26.90
  -1  -5 -25  223.58   12.00
   1  -5 -25  219.88   12.40
  -1   5 -25  227.28   21.20
   1  -5 -25  221.78   22.00
   2   5 -25   59.09   11.80
   2   5 -25   60.19   18.70
   2  -5 -25   61.49   14.60
  -2  -5  25   58.29   12.50
   2  -5 -25   84.09   11.30
  -2   5 -25   98.89   19.10
   3   5 -25   58.29   19.10
   3   5 -25   71.19   10.60
  -3  -5  25   45.80   12.90
   3  -5 -25   66.99    9.30
  -3   5 -25   97.19   15.90
   4   5 -25  156.18   11.30
   4   5 -25  136.59   23.70
  -4  -5  25  127.29   19.20
   4  -5 -25  127.39    9.40
   5   5 -25   60.59   12.90
   5   5 -25   83.19   10.30
  -5   5  25   61.59   14.10
   5  -5 -25   75.79    6.90
  -5  -5  25   88.59   14.70
  -6   5  25   48.60   10.10
   6   5 -25   76.79    6.80
  -6  -5  25   67.29    9.40
   0   6 -25   29.30   13.10
   0  -6 -25   -0.90    6.90
   0   6 -25    9.20   15.50
   1   6 -25   48.60   16.90
   1   6 -25   46.40   13.60
  -1   6 -25   39.70   13.00
   1  -6 -25   20.00    7.30
   2   6 -25   53.99   18.30
   2   6 -25   22.80   10.50
  -2   6 -25   33.10   12.60
   2  -6 -25   31.80    7.10
   3   6 -25   83.49   17.90
   3   6 -25   98.69   10.40
   3  -6 -25  112.69    9.20
  -3   6 -25   88.59   15.30
   4   6 -25  115.59   19.60
  -4   6  25  114.59   14.80
   4   6 -25  113.29    8.60
  -4  -6  25  125.29   16.00
   4  -6 -25  126.29    7.80
  -5   6  25   16.30   10.20
   5   6 -25   10.50    4.60
   0   7 -25  107.49   17.50
   0   7 -25   65.19   14.90
   1   7 -25  292.47   17.40
   1   7 -25  231.98   24.70
  -1   7 -25  296.17   20.60
   2   7 -25   32.80   15.40
   2   7 -25   22.50    8.80
  -2   7 -25   38.90   10.30
   3   7 -25   27.20   12.80
  -3   7 -25   23.90    8.40
   0   8 -25   -4.70    7.50
   1   8 -25   87.99   14.50
   1   8 -25   98.89   19.90
  -1   8 -25   61.39   11.30
   0   0 -26  832.42   26.50
   0   0 -26  859.61   29.80
   1   0 -26   25.80    9.20
  -1   0 -26   34.40   12.60
   1   0 -26   31.70    5.80
   1   0 -26   27.80   12.90
  -1   0 -26   35.10   10.70
   2   0 -26    7.90    9.00
   2   0 -26    7.30    6.40
  -2   0 -26   14.60    9.00
   2   0 -26   -5.00   12.90
   3   0 -26  155.48   10.20
   3   0 -26  128.99   21.20
  -3   0 -26  147.09   15.90
   4   0 -26   35.70    7.80
   4   0 -26   30.40   13.80
  -4   0  26   26.90   12.30
   5   0 -26   -0.20    7.20
  -5   0  26   -7.00   11.30
  -5   0  26   -3.30   10.60
  -6   0  26  138.89   17.10
  -6   0  26  123.89   17.90
   6   0 -26  124.09    9.50
   7   0 -26   16.80    4.60
  -7   0  26   16.10    8.20
   0   1 -26   -1.30   10.20
   0  -1 -26    4.40    8.50
   0   1 -26    1.70   12.40
   0   1 -26    2.00   21.00
   0  -1 -26  -13.70   13.00
   1   1 -26    9.80    6.20
   1   1 -26    7.40    9.90
   1   1 -26   27.30   24.30
  -1  -1 -26   -1.50   13.80
  -1  -1 -26   13.30   10.00
   1   1 -26   14.40   13.90
  -1   1 -26   -5.50   10.30
   1  -1 -26    7.60    8.50
   1  -1 -26   15.30    6.30
   1  -1 -26    2.00   14.00
  -1   1 -26   13.90   13.40
  -1   1 -26   36.40   21.60
   2   1 -26   17.70    9.10
   2   1 -26   19.10    6.90
  -2  -1 -26    4.00    9.90
   2   1 -26   33.20   14.70
   2   1 -26   38.30   24.10
   2  -1 -26   17.10   13.80
   2  -1 -26   26.70    6.70
   2  -1 -26   20.90    9.20
  -2   1 -26   25.50    9.80
  -3  -1 -26  221.18   16.40
   3   1 -26  208.48   12.70
   3   1 -26  240.18   21.40
   3  -1 -26  200.98   12.20
   3  -1 -26  241.48   21.20
  -3   1 -26  212.98   17.00
  -4   1  26  109.29   13.50
   4   1 -26   73.59   14.90
   4   1 -26   82.19   11.10
   4  -1 -26   83.29   10.90
  -4  -1  26   92.79   11.70
   4  -1 -26   88.19   15.20
  -4  -1  26   87.99   14.50
  -5   1  26  198.18   18.90
   5   1 -26  235.88   13.20
  -5  -1  26  228.38   19.40
  -5  -1  26  234.58   21.80
   5  -1 -26  256.77   12.70
  -6   1  26   -4.20    9.60
   6   1 -26   -0.20    6.30
   6  -1 -26   12.80    6.30
  -6  -1  26    4.60   11.20
  -6  -1  26    0.90   10.00
   7   1 -26    6.10    4.50
  -7   1  26    8.70    7.60
  -7  -1  26   12.90    7.50
   7  -1 -26   13.00    3.90
   0  -2 -26  665.83   23.30
   0  -2 -26  696.83   29.10
   0  -2 -26  633.14   18.00
   0   2 -26  659.13   42.90
   0   2 -26  643.24   23.40
   0   2 -26  684.73   27.60
   1   2 -26  145.59   16.40
  -1  -2 -26  137.79   20.40
   1   2 -26  143.19   20.30
  -1  -2 -26  124.99   15.60
   1   2 -26  134.69   27.30
   1  -2 -26  126.29   10.20
   1  -2 -26  137.39   21.00
   1  -2 -26  123.79   15.30
  -1   2 -26  139.19   26.00
  -1   2 -26  132.09   20.40
  -1   2 -26  123.29   15.60
  -2  -2 -26   14.20    9.60
   2   2 -26   19.70   23.80
   2   2 -26    6.30    6.20
   2   2 -26    6.80   15.40
  -2  -2 -26   15.20   13.50
   2   2 -26    4.90    9.00
   2  -2 -26    4.70    8.70
  -2   2 -26    7.20   11.10
   2  -2 -26   -3.90    6.20
   2  -2 -26   11.50   13.40
  -3  -2 -26  331.77   17.80
   3   2 -26  371.16   34.10
   3   2 -26  334.77   14.40
   3   2 -26  327.97   26.50
   3  -2 -26  378.76   15.00
   3  -2 -26  362.16   24.20
  -3   2 -26  356.56   20.30
   4   2 -26   64.19    9.20
   4   2 -26   63.59   15.40
  -4  -2  26   49.00   14.40
  -4  -2  26   61.19   14.10
   4  -2 -26   55.39    8.10
   4  -2 -26   30.70   13.10
   5   2 -26  157.18   12.40
   5   2 -26  125.89   20.00
  -5   2  26  162.18   17.50
  -5  -2  26  148.99   21.00
   5  -2 -26  160.38   10.70
  -5  -2  26  154.48   16.80
  -6   2  26   17.70    9.60
   6   2 -26   15.50    6.80
  -6   2  26   40.10   14.60
  -6  -2  26   20.60    8.80
  -6  -2  26   24.30   11.20
   6  -2 -26   32.90    5.60
   7   2 -26   44.80    6.40
  -7   2  26   55.39    7.50
  -7  -2  26   56.29    9.30
   0   3 -26  187.08   37.10
   0  -3 -26  154.08   20.60
   0   3 -26  203.28   18.50
   0  -3 -26  209.98   10.40
   0   3 -26  169.88   22.50
   0  -3 -26  180.98   14.80
   1   3 -26  205.08   24.20
   1   3 -26  195.08   18.60
  -1  -3 -26  170.58   21.50
   1   3 -26  165.78   33.20
  -1  -3 -26  162.78   16.30
  -1   3 -26  154.48   16.40
   1  -3 -26  143.29   14.00
   1  -3 -26  165.78   20.00
   1  -3 -26  154.08   10.10
  -1   3 -26  158.08   33.00
  -1   3 -26  141.59   21.50
   2   3 -26   78.59   10.40
   2   3 -26   93.79   19.40
  -2  -3 -26  100.69   15.50
  -2  -3 -26   93.39   15.80
   2   3 -26  132.09   29.30
   2   3 -26   92.59   16.50
   2  -3 -26   78.39   10.40
   2  -3 -26   65.89   14.60
  -2   3 -26   79.39   14.10
   3   3 -26   94.59   24.90
   3   3 -26   85.29   11.30
   3   3 -26  115.39   23.40
  -3  -3  26   89.69   15.50
   3  -3 -26   72.99   10.50
   3  -3 -26   71.59   15.00
  -3   3 -26   70.39   12.00
   4   3 -26   21.10   16.00
   4   3 -26   19.30    7.30
   4  -3 -26   41.70    7.50
   4  -3 -26   33.60   12.40
  -4  -3  26   31.40   13.70
   5   3 -26  115.29   19.50
   5   3 -26  150.58   12.10
  -5   3  26  132.19   16.40
  -5  -3  26  100.19   14.30
   5  -3 -26  141.59    9.60
   6   3 -26   42.70    6.80
  -6   3  26   41.80    8.90
  -6   3  26   37.80   13.80
   6  -3 -26   29.30    4.80
  -6  -3  26   20.10   10.60
   0   4 -26  203.18   23.40
   0  -4 -26  228.48   12.30
   0   4 -26  218.98   36.50
   0   4 -26  258.67   22.40
   0  -4 -26  226.48   24.10
   1   4 -26  117.49   22.60
  -1  -4 -26  112.09   22.40
   1   4 -26  110.99   28.80
   1   4 -26  100.29   15.80
  -1  -4 -26  101.49    9.70
  -1   4 -26   87.19   22.70
  -1   4 -26  121.69   21.00
  -1   4 -26  114.29   25.70
   1  -4 -26   95.49   16.40
   1  -4 -26   77.99   10.50
   2   4 -26   37.30   19.00
   2   4 -26   44.10    7.20
   2   4 -26   31.70   11.40
  -2   4 -26   19.90   11.60
   2  -4 -26   38.40    7.00
  -2  -4  26   53.59   14.00
   2  -4 -26   38.30   13.70
   3   4 -26   92.09   18.20
   3   4 -26   84.49   11.10
  -3   4 -26   86.09   17.20
   3  -4 -26  101.69   10.30
  -3  -4  26   94.49   14.40
   3  -4 -26   83.39   14.50
   4   4 -26  178.38   12.70
   4   4 -26  183.58   24.80
  -4  -4  26  123.49   19.80
   4  -4 -26  151.58    9.60
  -5   4  26   98.29   10.40
   5   4 -26  100.09   10.70
   5   4 -26   59.49   13.40
   5  -4 -26   65.59    8.10
  -5  -4  26   55.89   12.00
  -6   4  26   68.29   11.00
   6   4 -26   58.09    7.70
  -6   4  26   57.59   12.10
   6  -4 -26   61.09    6.70
  -6  -4  26   60.39    9.80
   0  -5 -26   46.40    7.80
   0   5 -26   41.80   16.90
   0   5 -26   47.20   15.20
  -1  -5 -26   22.90    6.70
   1   5 -26   27.10   13.10
   1   5 -26   40.30   18.90
  -1   5 -26   30.90   13.70
   1  -5 -26    8.30   16.10
   1  -5 -26   23.60    7.70
   2   5 -26   75.09   15.30
   2   5 -26   99.89   19.40
   2  -5 -26  110.29   11.30
  -2   5 -26  108.39   17.80
  -2  -5  26   88.19   13.10
   3   5 -26   32.10    7.40
   3   5 -26   38.50   17.30
  -3   5 -26   42.90   10.80
  -3  -5  26   54.69   13.00
   3  -5 -26   52.29    7.70
   4   5 -26  179.68   10.90
   4   5 -26  153.08   21.50
  -4   5  26  156.88   14.50
   4  -5 -26  163.88    9.90
  -4  -5  26  179.18   18.40
   5   5 -26   31.70    6.40
   5   5 -26   37.20   10.80
  -5   5  26   40.70   13.10
   5  -5 -26   44.00    6.60
  -5  -5  26   42.30    9.60
   0   6 -26   12.80   13.80
   0  -6 -26    3.90    6.80
   0   6 -26    2.00   14.50
   1   6 -26   60.39   17.70
   1   6 -26   28.70   12.70
  -1   6 -26   27.30   12.90
   1  -6 -26   35.40    7.50
   2   6 -26  250.67   26.20
   2   6 -26  222.98   17.00
  -2   6 -26  251.47   18.10
   2  -6 -26  269.07   12.10
   3   6 -26   28.40    6.20
   3   6 -26   21.50   14.60
   3  -6 -26   27.50    6.10
  -3   6 -26   25.00    9.90
   4   6 -26  100.49    8.70
   4   6 -26  105.59   19.80
  -4   6  26  103.99   18.60
   4  -6 -26  100.99    7.60
   0   7 -26   54.59   14.10
   0   7 -26   95.29   16.60
   1   7 -26   99.19   20.70
   1   7 -26  100.39   13.90
  -1   7 -26  115.39   17.20
   2   7 -26   -6.20    7.40
   2   7 -26    6.80   13.20
  -2   7 -26    8.20    8.70
   3   7 -26   79.79   13.70
  -3   7 -26   89.39   14.10
   0   0 -27    5.20   12.30
   0   0 -27    5.10    8.60
   1   0 -27   62.99    9.20
   1   0 -27   76.39   12.80
   1   0 -27   57.19   15.30
  -1   0 -27   61.69   15.10
  -1   0 -27   64.89   12.80
  -2   0 -27  369.96   19.50
   2   0 -27  392.66   18.00
   2   0 -27  375.66   14.00
   2   0 -27  386.56   25.80
   3   0 -27  266.17   12.10
   3   0 -27  252.47   23.30
  -3   0 -27  252.17   17.70
  -4   0  27   20.60   12.50
   4   0 -27    8.00    7.40
   4   0 -27   -5.50   13.40
  -5   0  27   31.60   11.60
   5   0 -27   22.00    7.30
  -5   0  27   30.90   10.90
  -6   0  27   78.69   10.40
   6   0 -27   75.99    9.20
  -7   0  27   28.00    7.60
   7   0 -27   26.30    4.70
   0   1 -27  300.37   18.00
   0  -1 -27  244.98   21.30
   0   1 -27  314.17   35.60
   0   1 -27  276.47   22.90
   0  -1 -27  260.97   17.30
   1   1 -27   23.50   10.20
   1   1 -27    8.00   13.60
  -1  -1 -27   26.40   13.60
  -1  -1 -27   24.10   10.30
   1   1 -27    9.30   24.10
  -1   1 -27   19.50   11.00
   1  -1 -27   10.00   13.50
   1  -1 -27   12.30    6.30
   1  -1 -27   16.90   10.10
  -1   1 -27    8.90   13.80
   2   1 -27  231.88   16.20
   2   1 -27  217.38   11.10
  -2  -1 -27  232.18   15.90
   2   1 -27  253.27   33.40
   2   1 -27  253.17   22.10
   2  -1 -27  200.38   15.30
   2  -1 -27  206.58   12.20
   2  -1 -27  217.68   23.50
  -2   1 -27  216.88   16.20
  -3  -1 -27   68.69   14.30
   3   1 -27   86.99   16.30
   3   1 -27   81.69   10.80
  -3   1 -27   54.89   10.70
   3  -1 -27   61.39    9.00
   3  -1 -27   63.29   14.90
   4   1 -27   35.20   14.50
  -4   1  27   42.20   12.30
   4   1 -27   41.70    8.30
  -4  -1  27   43.30   13.80
  -4  -1  27   37.00   10.70
   4  -1 -27   45.50   14.10
   4  -1 -27   42.60    7.70
   5   1 -27   17.70   19.40
  -5   1  27    4.40   10.50
   5   1 -27    5.70    6.80
   5  -1 -27   14.00    6.70
  -5  -1  27    8.30   10.60
  -5  -1  27   12.20   11.70
  -6   1  27    3.80    9.00
   6   1 -27    8.70    6.10
  -6  -1  27   -8.40   10.60
  -6  -1  27   -8.10    9.40
   6  -1 -27    0.60    5.40
  -7   1  27   53.09    7.80
   7   1 -27   41.90    5.60
  -7  -1  27   64.69   10.30
   0  -2 -27  257.17   11.60
   0   2 -27  240.38   16.90
   0   2 -27  283.67   33.40
   0  -2 -27  297.07   23.30
   0   2 -27  260.97   23.70
   0  -2 -27  266.37   18.40
  -1  -2 -27   90.09   16.60
   1   2 -27  100.99   25.10
   1   2 -27   82.39   13.50
   1   2 -27  115.89   22.50
  -1  -2 -27  100.79   16.20
  -1   2 -27   79.39   22.70
  -1   2 -27   68.49   12.40
  -1   2 -27   68.49   13.90
   1  -2 -27   87.89   16.50
   1  -2 -27   61.29    9.20
   1  -2 -27   67.89   11.70
   2   2 -27  127.99   10.60
  -2  -2 -27  104.59   14.20
  -2  -2 -27  113.09   20.30
   2   2 -27  115.39   18.50
   2   2 -27  125.99   15.40
   2   2 -27  136.59   28.70
   2  -2 -27  136.19   21.90
  -2   2 -27  155.58   17.00
   2  -2 -27  129.39   14.20
   2  -2 -27  142.69   11.20
   3   2 -27   16.00   15.60
   3   2 -27   40.50   21.60
  -3  -2 -27    6.70    9.90
   3   2 -27   -0.20    7.40
  -3  -2  27  -15.90   15.40
   3  -2 -27    2.80   13.60
   3  -2 -27    4.90    6.80
  -3   2 -27   -3.60   10.50
   4   2 -27   33.60    7.40
   4   2 -27   39.70   13.70
   4  -2 -27   33.80    7.50
   4  -2 -27   32.70   13.50
  -4  -2  27   56.59   14.40
   5   2 -27   41.50   13.10
   5   2 -27   74.59   10.30
  -5   2  27   59.99   11.60
   5  -2 -27   49.60    7.00
  -5  -2  27   43.40   12.40
  -5  -2  27   72.69   10.40
   6   2 -27    9.50    6.10
  -6   2  27   14.70    8.70
  -6   2  27   21.00   12.70
   6  -2 -27   14.30    4.80
  -6  -2  27   21.90   10.40
  -6  -2  27   31.10    8.40
   0  -3 -27   16.10    9.50
   0  -3 -27   18.20    6.80
   0  -3 -27   17.10   14.80
   0   3 -27   19.20   22.00
   0   3 -27   -5.00   15.20
   0   3 -27   13.60   11.40
   1   3 -27   -6.50   24.40
  -1  -3 -27   -1.90    9.80
  -1  -3 -27   16.00   13.60
   1   3 -27   21.40   15.30
   1   3 -27    0.70    9.60
  -1   3 -27   30.80   21.20
   1  -3 -27    4.80   14.40
   1  -3 -27    8.60    7.30
  -1   3 -27   12.80   13.30
  -1   3 -27    9.90   14.70
   1  -3 -27    6.60    9.40
  -2  -3 -27  131.19   20.70
   2   3 -27  149.39   29.30
   2   3 -27  145.09   15.90
   2   3 -27  114.79   10.40
   2   3 -27  117.79   21.10
   2  -3 -27  121.59   21.60
   2  -3 -27  108.19   10.60
  -2   3 -27  129.59   17.70
   3   3 -27  109.99   18.30
   3   3 -27  127.39   10.70
  -3  -3  27   90.49   15.00
  -3   3 -27  121.89   15.70
   3  -3 -27  104.29   20.80
   3  -3 -27  136.39   10.80
   4   3 -27   12.60    8.10
   4   3 -27   22.60   15.50
   4  -3 -27   22.60   12.20
   4  -3 -27   21.30    6.60
  -4  -3  27   25.60   13.20
   5   3 -27    8.80   12.00
  -5   3  27   20.10    9.40
   5   3 -27   13.70    6.70
   5  -3 -27   19.30    5.90
  -5  -3  27   19.50   12.30
  -6   3  27   32.30   12.90
  -6   3  27   16.80    8.50
   6   3 -27   19.90    5.90
  -6  -3  27   14.80    9.90
   6  -3 -27    6.90    3.80
   0  -4 -27  146.69   22.00
   0   4 -27  169.18   35.90
   0  -4 -27  197.58   11.10
   0   4 -27  176.98   25.30
   0   4 -27  214.98   20.40
   1   4 -27  197.48   18.80
  -1  -4 -27  203.78   23.50
  -1  -4 -27  192.58   10.80
   1   4 -27  232.48   25.40
   1  -4 -27  176.38   11.40
  -1   4 -27  209.08   19.90
  -1  -4  27  171.18   22.30
   1  -4 -27  178.38   22.00
   2   4 -27    6.10   15.80
   2   4 -27    9.30    9.90
   2   4 -27    7.90   10.30
   2  -4 -27   -3.10   13.80
  -2   4 -27   -7.30   12.70
  -2  -4  27    0.80   13.50
   2  -4 -27    3.10    6.80
   3   4 -27   -1.50    7.30
   3   4 -27    1.80   16.00
   3  -4 -27   -7.00   12.40
   3  -4 -27    7.10    5.90
  -3   4 -27   -1.10   11.40
  -3  -4  27   -2.80   13.00
   4   4 -27   85.79   10.50
   4   4 -27   59.59   15.70
  -4  -4  27   60.69   12.90
   4  -4 -27   76.89    8.70
   4  -4 -27   98.59   17.90
   5   4 -27   19.20   11.10
   5   4 -27   43.80    7.10
  -5   4  27   44.70    9.10
   5  -4 -27   26.60    5.20
  -5  -4  27   26.60   10.80
  -6   4  27   36.30   11.20
   6   4 -27   27.20    5.00
  -6  -4  27   23.30    8.50
   0   5 -27  218.48   25.40
   0   5 -27  275.17   21.30
   0  -5 -27  274.07   12.50
  -1  -5 -27   23.30    6.80
   1   5 -27   23.40   11.90
   1   5 -27   23.40   16.00
  -1   5 -27   17.90   13.20
   1  -5 -27   18.30    7.50
   2   5 -27    7.00    9.80
   2   5 -27    6.60   16.60
  -2   5 -27   18.30   11.70
  -2  -5  27   29.60   11.10
   2  -5 -27   17.80    7.20
   3   5 -27   40.90   17.10
   3   5 -27   29.90    7.20
   3  -5 -27   41.30    7.30
  -3   5 -27   37.00   10.70
  -3  -5  27   25.20   11.60
  -4   5  27   29.90    8.20
   4   5 -27   37.70   14.30
   4   5 -27   44.60    6.70
   4  -5 -27   26.80    5.50
  -4  -5  27   46.40   10.30
   5   5 -27    5.10    5.40
  -5   5  27    5.30   11.50
   5   5 -27   -2.50    8.80
  -5  -5  27    7.70    8.40
   5  -5 -27    2.30    4.00
   0   6 -27   37.70   12.60
   0   6 -27   26.70   14.70
   0  -6 -27   39.00    6.60
   1   6 -27   36.30   11.00
   1   6 -27   39.50   15.30
  -1   6 -27   44.10   12.40
   1  -6 -27   34.30    6.80
   2   6 -27  188.48   24.20
   2   6 -27  161.58   14.80
   2  -6 -27  163.58   10.10
  -2   6 -27  182.48   16.70
   3   6 -27   48.90   15.00
   3  -6 -27   91.79    8.60
  -3   6 -27   66.89   14.10
   4   6 -27    4.40    5.00
   4   6 -27   -1.00   10.60
  -4   6  27   10.30   10.70
   4  -6 -27    2.10    4.30
   0   7 -27   75.99   12.30
   0   7 -27  121.19   13.80
   1   7 -27   -2.90    8.80
   1   7 -27   14.30   12.90
  -1   7 -27    1.30    8.90
   2   7 -27   18.20   12.30
  -2   7 -27    8.40    8.10
   3   7 -27   15.80   10.70
   0   0 -28  189.48   21.70
   0   0 -28  193.68   16.80
  -1   0 -28  310.77   22.50
  -1   0 -28  307.27   17.40
   1   0 -28  310.57   12.30
   1   0 -28  289.77   24.40
   1   0 -28  297.37   17.60
  -2   0 -28   51.49   11.50
   2   0 -28   45.40    7.30
   2   0 -28   50.19   15.70
   2   0 -28   32.30    9.30
   3   0 -28  357.56   24.20
  -3   0 -28  383.16   19.40
   3   0 -28  352.36   13.40
   4   0 -28  351.26   23.60
  -4   0  28  343.27   22.50
   4   0 -28  390.56   14.40
  -5   0  28   28.00   10.60
   5   0 -28   25.60    7.20
  -5   0  28   26.60   10.50
   6   0 -28    7.30    5.80
  -6   0  28   10.30    9.00
   0   1 -28   10.60   13.60
   0  -1 -28   -3.40   14.60
   0  -1 -28    6.30    9.30
   0   1 -28    3.30   10.60
  -1  -1 -28  144.89   15.20
   1   1 -28  175.48   34.50
   1   1 -28  140.59   15.80
   1   1 -28  165.98   22.20
  -1  -1 -28  179.98   20.90
  -1   1 -28  156.68   17.20
  -1   1 -28  150.38   20.90
   1  -1 -28  146.39   10.80
   1  -1 -28  140.99   13.90
   1  -1 -28  183.98   22.60
  -2  -1 -28   99.49   15.50
   2   1 -28  105.29   22.00
   2   1 -28  113.79   14.20
   2   1 -28   88.39   10.10
   2  -1 -28   84.69   10.10
   2  -1 -28   85.99   13.30
  -2   1 -28   97.49   14.50
   2  -1 -28   87.69   15.70
   3   1 -28   51.29    7.70
   3   1 -28   66.59   15.80
  -3  -1 -28   76.79   15.00
   3  -1 -28   66.59    9.50
   3  -1 -28   47.00   14.80
  -3   1 -28   57.79   11.40
   4   1 -28   73.19   14.90
  -4   1  28  106.49   13.80
   4   1 -28  102.59   10.60
   4  -1 -28   80.39   14.00
   4  -1 -28   98.69   10.90
  -4  -1  28   98.29   14.60
  -4  -1  28   79.89   11.70
  -5   1  28  123.39   15.50
   5   1 -28  107.79   10.80
   5   1 -28   64.49   14.20
   5  -1 -28  105.69    9.70
  -5  -1  28  106.09   12.90
  -5  -1  28   97.39   12.10
  -6   1  28   12.10    9.10
   6   1 -28    1.80    5.90
   6  -1 -28   -6.40    5.30
  -6  -1  28   -2.00    8.00
  -6  -1  28    5.10    9.50
   0  -2 -28   16.40    6.70
   0  -2 -28   13.40   13.30
   0   2 -28   18.80   10.70
   0  -2 -28   15.10   10.90
   0   2 -28   22.80   14.30
   0   2 -28   41.80   23.20
   1   2 -28   68.49   16.60
   1   2 -28  101.29   26.70
  -1  -2 -28   77.79   14.70
  -1  -2 -28   82.29   16.10
   1   2 -28   45.60   11.30
   1  -2 -28   94.99   15.10
   1  -2 -28   66.69   14.80
  -1   2 -28  163.38   32.80
  -1   2 -28   80.39   16.80
  -1   2 -28   78.09   12.20
   1  -2 -28   79.59    8.80
   2   2 -28   87.69   15.20
   2   2 -28   87.99   17.40
  -2  -2 -28   75.79   11.80
   2   2 -28   96.79   26.20
  -2  -2 -28   96.09   15.40
   2   2 -28   81.79   10.00
   2  -2 -28   90.09   16.00
   2  -2 -28   92.79   10.40
  -2   2 -28  108.79   15.50
   2  -2 -28   76.19   13.60
  -3  -2 -28  592.74   22.20
   3   2 -28  583.44   18.10
   3   2 -28  523.45   28.30
  -3  -2  28  571.84   27.70
  -3   2 -28  551.74   22.20
   3  -2 -28  545.75   17.30
   3  -2 -28  498.35   26.40
   4   2 -28  127.69   11.10
   4   2 -28  110.39   22.20
   4  -2 -28   95.69   10.10
   4  -2 -28  100.49   18.30
  -4  -2  28   75.69   13.40
   5   2 -28   50.69    7.60
  -5   2  28   55.69   10.30
   5   2 -28   63.19   12.30
   5  -2 -28   36.30    6.40
  -5  -2  28   52.79   12.20
  -6   2  28   15.90   12.20
  -6   2  28   39.60    8.90
   6   2 -28   56.99    8.30
  -6  -2  28   18.20    9.80
   6  -2 -28   29.50    4.90
   0  -3 -28   37.60   10.20
   0   3 -28   36.40   23.70
   0  -3 -28   51.99    7.10
   0  -3 -28   37.20   14.50
   0   3 -28   51.99   12.80
   0   3 -28   27.30   15.70
   1   3 -28   20.50   23.10
  -1  -3 -28    9.10   10.20
  -1  -3 -28    3.30   13.90
   1   3 -28   11.10   11.00
   1   3 -28   11.40   16.30
  -1   3 -28   11.10   11.10
  -1   3 -28   45.30   21.20
   1  -3 -28    9.20   15.20
  -1   3 -28    3.80   14.70
   1  -3 -28    7.90    6.40
  -2  -3 -28  139.79   21.00
   2   3 -28  141.99   11.40
   2   3 -28  156.68   24.90
   2   3 -28  142.39   16.20
   2  -3 -28  133.49   22.40
   2  -3 -28  139.19   11.20
  -2   3 -28  136.09   17.80
   3   3 -28   25.70    7.60
   3   3 -28   27.70   16.80
  -3  -3  28   23.70   13.50
  -3   3 -28   14.70   11.20
   3  -3 -28   24.90    7.20
   3  -3 -28   23.50   13.50
   4   3 -28    9.10    7.30
   4   3 -28   -8.20   14.00
  -4  -3  28   17.70   12.50
   4  -3 -28    3.40    6.20
   4  -3 -28   11.50   11.60
   5   3 -28   61.29   12.50
   5   3 -28   69.19    9.70
  -5   3  28   80.09    9.80
   5  -3 -28   94.19    8.90
  -5  -3  28  101.79   13.10
  -6   3  28   52.29   12.00
  -6   3  28   47.50    8.00
   6   3 -28   55.79    8.00
   6  -3 -28   38.10    4.30
  -6  -3  28   30.30    9.10
   0   4 -28   37.70   14.00
   0   4 -28   30.40   17.00
   0  -4 -28   37.20    6.90
   0  -4 -28   25.00   14.10
   1   4 -28   89.39   17.00
  -1  -4 -28   60.59   16.60
   1   4 -28   66.89   17.60
  -1   4 -28   84.19   15.00
   1  -4 -28   87.69   16.50
   1  -4 -28   72.09   10.20
  -1  -4  28   69.59   12.80
   2   4 -28   42.20   17.00
   2   4 -28   40.80   10.50
  -2   4 -28   40.70   11.70
   2  -4 -28   40.80    7.20
  -2  -4  28   22.50   13.00
   2  -4 -28   49.30   15.50
   3   4 -28  255.77   12.90
   3   4 -28  292.27   27.90
   3  -4 -28  279.77   21.10
   3  -4 -28  256.37   11.40
  -3   4 -28  273.27   18.00
  -3  -4  28  291.87   22.40
   4   4 -28   69.19   15.20
   4   4 -28   76.59   10.10
  -4  -4  28   51.29   12.80
   4  -4 -28   59.09    8.60
   5   4 -28  -15.10    5.70
   5   4 -28   -5.40    9.70
  -5   4  28    3.70    8.30
  -5  -4  28    5.10    9.80
   5  -4 -28    1.90    4.60
   0  -5 -28   30.50    6.70
   0   5 -28   17.90   15.10
   0   5 -28   43.90   12.90
   1   5 -28    5.80   11.40
   1   5 -28    0.80   16.90
  -1  -5 -28   10.10    6.20
  -1   5 -28   14.30   12.40
   1  -5 -28   -1.00    6.60
   2   5 -28   50.39   10.60
   2   5 -28   57.39   17.80
   2  -5 -28   61.29    9.60
  -2  -5  28   54.49   11.50
  -2   5 -28   58.79   13.10
   3   5 -28   87.29   16.60
   3   5 -28   72.49    9.70
  -3  -5  28   91.29   11.80
   3  -5 -28   74.49    9.20
  -3   5 -28   76.29   15.30
   4   5 -28  120.69   20.40
  -4   5  28  137.39   13.00
   4   5 -28  147.09    9.90
  -4  -5  28  127.59   15.30
   4  -5 -28  159.08    8.40
  -5   5  28   14.30   10.20
   5   5 -28   12.50    4.50
  -5  -5  28   -0.10    7.60
   0   6 -28   26.40   13.70
   0   6 -28   24.80   11.20
   1   6 -28   70.99   11.50
   1   6 -28   37.30   15.30
  -1   6 -28   90.49   16.70
   1  -6 -28   71.79    9.20
   2   6 -28  100.69   12.80
   2   6 -28  151.28   22.60
   2  -6 -28  148.59    9.70
  -2   6 -28  143.39   15.20
   3   6 -28   34.90   14.00
   3  -6 -28   48.80    7.40
  -3   6 -28   25.60    8.10
  -4   6  28   88.29   18.70
   4   6 -28   50.59   10.70
   4  -6 -28   66.69    7.70
   0   7 -28    1.50    8.00
   1   7 -28  103.39   12.20
   1   7 -28   89.19   16.70
  -1   7 -28   84.29   13.30
   2   7 -28   95.79   15.80
  -2   7 -28   82.89   10.80
   0   0 -29   -4.20    9.90
   0   0 -29   -5.50   14.70
   1   0 -29   69.59    9.80
   1   0 -29   74.89   15.40
  -1   0 -29   79.79   16.00
  -1   0 -29   67.49   11.50
   1   0 -29   73.79   16.00
   2   0 -29   20.70    9.40
   2   0 -29   35.80   14.60
   2   0 -29   19.40    6.80
  -2   0 -29   10.30    9.50
  -3   0 -29  383.96   19.00
   3   0 -29  366.36   14.20
   3   0 -29  376.66   25.40
  -4   0  29   51.09   13.10
   4   0 -29   61.49   14.50
   4   0 -29   67.09    9.80
  -4   0  29   53.09   11.50
   5   0 -29    6.60    6.20
  -5   0  29   -7.50    9.80
  -5   0  29    4.60    9.80
   6   0 -29    4.20    5.20
  -6   0  29   -2.60    8.30
   0  -1 -29  172.68   22.90
   0  -1 -29  146.59   16.60
   0   1 -29  162.48   16.80
   0   1 -29  155.98   21.90
   1   1 -29  494.85   26.80
  -1  -1 -29  547.55   22.30
   1   1 -29  533.75   21.70
  -1  -1 -29  482.95   25.90
  -1   1 -29  474.85   25.40
  -1   1 -29  493.65   21.80
   1  -1 -29  480.25   15.40
   1  -1 -29  487.95   20.60
   1  -1 -29  457.25   25.50
   2   1 -29    9.50    9.30
   2   1 -29    9.90    6.30
   2   1 -29   -0.30   14.70
  -2  -1 -29   16.10    9.60
   2  -1 -29   18.10    9.80
   2  -1 -29   10.20    6.80
  -2   1 -29   14.20    9.70
   2  -1 -29   21.20   14.70
   3   1 -29   17.40    7.20
  -3  -1 -29   25.40   10.80
   3   1 -29   37.00   15.50
   3  -1 -29   17.90    6.70
   3  -1 -29   23.60   14.20
  -3   1 -29   20.30   10.30
   4   1 -29   59.19   13.90
  -4   1  29   74.89   12.70
   4   1 -29   72.49    8.30
   4  -1 -29   62.59    8.10
   4  -1 -29   77.89   14.00
  -4  -1  29   78.99   13.80
  -4  -1  29   77.49   10.90
   5   1 -29   43.90    7.10
   5   1 -29   26.10   12.60
  -5   1  29   41.00   10.50
   5  -1 -29   48.00    6.90
  -5  -1  29   41.30   11.40
  -5  -1  29   40.30   10.00
  -6   1  29   28.00    8.40
   6   1 -29   15.30    5.40
   6  -1 -29    9.90    4.90
  -6  -1  29   -1.80    7.50
  -6  -1  29   26.10    9.10
   0   2 -29   29.70   12.00
   0  -2 -29   25.70   15.00
   0   2 -29   57.19   25.30
   0   2 -29   34.80   14.00
   0  -2 -29   21.10   10.20
   1   2 -29  220.38   17.80
  -1  -2 -29  233.08   18.00
  -1  -2 -29  237.28   22.30
   1   2 -29  266.07   36.50
   1   2 -29  233.78   21.90
  -1   2 -29  330.37   33.70
  -1   2 -29  222.18   23.50
  -1   2 -29  214.98   19.40
   1  -2 -29  235.18   24.20
   1  -2 -29  205.78   11.10
   1  -2 -29  204.38   16.00
   2   2 -29   17.40    7.00
  -2  -2 -29   36.60   19.10
   2   2 -29   50.59   22.00
  -2  -2 -29   19.40   10.90
   2   2 -29   25.60   15.10
   2   2 -29   18.40    9.70
  -2   2 -29   29.90   11.10
   2  -2 -29   13.50    6.70
   2  -2 -29   22.00    8.80
   2  -2 -29   27.40   14.70
   3   2 -29  120.39   21.20
  -3  -2 -29  134.89   14.70
   3   2 -29  161.58   11.30
   3  -2 -29  133.79   10.70
  -3  -2  29  115.69   15.20
  -3   2 -29  162.48   17.30
   3  -2 -29  126.19   19.70
   4   2 -29  203.18   11.70
   4   2 -29  160.38   21.50
   4  -2 -29  172.68   10.50
  -4  -2  29  154.58   19.80
   4  -2 -29  167.28   20.20
   5   2 -29   33.40    6.70
   5   2 -29   25.30   11.90
  -5   2  29   34.60    9.50
  -5  -2  29   20.00   11.70
   5  -2 -29   21.00    6.10
   6   2 -29   10.40    5.30
  -6   2  29   10.70    7.80
  -6   2  29   20.60   10.90
   6  -2 -29   16.00    4.50
  -6  -2  29    2.00    8.40
   0  -3 -29  183.88   10.50
   0   3 -29  190.98   18.20
   0  -3 -29  170.58   15.70
   0  -3 -29  157.88   22.80
   0   3 -29  136.69   24.50
   1   3 -29  115.49   23.70
   1   3 -29  106.79   15.50
  -1  -3 -29  121.59   20.40
   1  -3 -29   82.89   15.70
  -1   3 -29  110.19   18.00
   1  -3 -29   93.29    9.60
  -1   3 -29   68.29   15.10
   2   3 -29    1.60   15.40
   2   3 -29   11.50    9.80
  -2  -3 -29   13.40   14.40
   2   3 -29    7.70    6.70
  -2   3 -29   14.00   10.90
   2  -3 -29    4.60   13.30
   2  -3 -29    5.40    6.80
  -2  -3  29   15.40   14.50
   3   3 -29  150.68   11.40
   3   3 -29  159.98   23.50
   3  -3 -29  164.18   20.80
  -3  -3  29  174.58   21.50
   3  -3 -29  157.88   11.00
  -3   3 -29  156.08   16.40
   4   3 -29  252.87   12.30
   4   3 -29  228.98   20.80
   4  -3 -29  216.38   11.30
   4  -3 -29  210.88   18.20
  -4  -3  29  193.18   21.00
  -5   3  29   98.69   13.90
   5   3 -29  122.89    9.50
   5   3 -29  106.29   16.40
  -5  -3  29  101.99   17.50
   5  -3 -29  116.19    8.50
   6   3 -29   -1.50    4.50
  -6   3  29    5.70   13.30
  -6   3  29    5.40    6.60
  -6  -3  29    6.60    7.80
   0  -4 -29  641.54   17.70
   0   4 -29  621.94   24.70
   0  -4 -29  569.14   26.80
   0   4 -29  624.24   30.30
  -1  -4 -29  131.39   22.10
   1   4 -29  156.98   26.00
   1   4 -29  170.68   18.70
  -1  -4  29  151.08   19.50
   1  -4 -29  135.09   21.50
  -1   4 -29  148.89   18.60
   1  -4 -29  151.38   10.10
   2   4 -29   41.70   16.70
   2   4 -29   40.40   10.10
   2  -4 -29   36.70    7.00
  -2  -4  29   35.10   12.90
  -2   4 -29   41.20   11.80
   2  -4 -29   45.40   14.70
   3   4 -29   91.69   17.40
   3   4 -29   70.39    9.40
  -3   4 -29   83.69   16.20
   3  -4 -29   79.49    9.70
  -3  -4  29   77.99   12.30
   3  -4 -29   97.39   14.10
   4   4 -29   66.79   14.00
   4   4 -29   79.39    9.70
  -4  -4  29   64.69   12.60
   4  -4 -29   59.69    8.40
  -5   4  29    9.90    7.90
   5   4 -29    8.10    9.40
   5   4 -29    2.70    5.30
  -5  -4  29   -4.20    9.20
   5  -4 -29    1.80    3.90
   0  -5 -29   -3.70    6.20
   0   5 -29    5.10   14.50
   0   5 -29   -3.70   12.50
   1   5 -29  215.98   17.20
   1   5 -29  211.68   25.20
  -1   5 -29  267.67   20.90
   1  -5 -29  240.78   11.70
   2   5 -29   87.49   13.50
   2   5 -29  127.39   22.80
  -2  -5  29  104.49   16.10
   2  -5 -29   73.39    9.40
  -2   5 -29  103.89   16.90
   3   5 -29   12.80   13.90
   3   5 -29    4.90    5.60
  -3   5 -29   -1.20    9.20
   3  -5 -29    6.30    5.70
  -3  -5  29   -6.80    9.60
  -4   5  29   11.10    6.60
   4   5 -29   11.20    5.00
   4   5 -29   20.60   11.70
  -4  -5  29    5.40    8.80
   4  -5 -29   17.70    4.80
   0   6 -29   24.50   10.50
   0   6 -29    9.40   12.40
   1   6 -29   51.39    9.80
   1   6 -29   43.60   13.90
   1  -6 -29   61.09    8.50
  -1   6 -29   60.59   11.00
   2   6 -29  137.09   21.50
   2   6 -29  108.79   11.60
   2  -6 -29  148.39    9.00
  -2   6 -29  142.69   14.30
   3   6 -29   11.30   12.10
  -3   6 -29   17.70    7.30
   3  -6 -29   23.30    4.80
   0   7 -29   -2.10    7.40
   1   7 -29   31.20   10.60
  -1   7 -29   27.90    7.60
   0   0 -30  464.45   21.90
   0   0 -30  497.45   28.10
   1   0 -30   17.00   15.30
  -1   0 -30   -1.80   14.20
   1   0 -30    2.50    9.60
  -1   0 -30    2.80   10.60
   1   0 -30    6.50    6.60
   2   0 -30   53.69   16.00
   2   0 -30   63.89    9.80
  -2   0 -30   68.09   11.50
   2   0 -30   68.99   13.90
   3   0 -30  709.13   30.30
   3   0 -30  709.73   19.70
  -3   0 -30  730.93   24.00
  -4   0  30    5.90   11.40
   4   0 -30    5.60   13.00
  -4   0  30    3.40   10.50
   4   0 -30   -0.10    6.20
   5   0 -30    9.70    6.10
  -5   0  30   -6.50    9.80
  -5   0  30    4.00    9.20
  -6   0  30   37.10    7.90
   6   0 -30   35.70    5.00
   0   1 -30    2.60   10.50
   0   1 -30   10.00   13.80
   0  -1 -30    6.40    9.50
   0  -1 -30    9.80   13.80
  -1  -1 -30  110.59   21.40
   1   1 -30  108.19   15.00
   1   1 -30  122.19   22.20
  -1  -1 -30   99.99   16.00
   1  -1 -30  140.19   23.20
   1  -1 -30  107.79    9.60
   1  -1 -30  112.29   13.50
  -1   1 -30  135.29   16.70
  -1   1 -30  131.79   21.60
  -2  -1 -30  178.38   16.60
   2   1 -30  174.78   15.90
   2   1 -30  183.68   23.50
   2   1 -30  168.08   10.80
  -2   1 -30  205.48   17.10
   2  -1 -30  207.38   16.10
   2  -1 -30  211.78   11.80
   2  -1 -30  240.88   24.40
   3   1 -30   42.20    7.10
  -3  -1 -30   56.49   10.70
   3   1 -30   43.70   15.00
   3  -1 -30   66.19   15.20
   3  -1 -30   72.89    9.60
  -3   1 -30   66.79   11.40
   4   1 -30   11.50   13.50
   4   1 -30    9.80    6.40
  -4   1  30   10.00   11.00
   4  -1 -30   12.50   12.80
  -4  -1  30   11.60    9.70
   4  -1 -30   21.00    7.20
  -4  -1  30   23.20   12.10
   5   1 -30  173.78   10.60
  -5   1  30  165.18   15.20
   5   1 -30  141.59   20.90
   5  -1 -30  180.78    9.70
  -5  -1  30  138.39   18.00
  -5  -1  30  171.78   15.40
   6   1 -30   10.40    4.70
  -6   1  30    9.70    7.10
  -6  -1  30   10.10    6.80
  -6  -1  30    6.80    7.80
   6  -1 -30    8.70    4.40
   0  -2 -30   86.19   15.80
   0  -2 -30   92.39   16.20
   0   2 -30   84.59   16.90
   0   2 -30  100.99   15.00
   0   2 -30  159.58   27.20
   1   2 -30   32.50   14.80
  -1  -2 -30   43.30   15.70
   1   2 -30   26.60   10.20
  -1  -2 -30   38.10   11.60
   1  -2 -30   28.80   15.40
  -1   2 -30   37.70   14.70
   1  -2 -30   22.00    9.80
   1  -2 -30   31.80    6.60
  -1   2 -30   26.50   11.10
  -2  -2 -30   89.49   15.30
   2   2 -30   80.69   15.00
   2   2 -30   80.19   16.20
   2   2 -30   65.59    9.40
   2  -2 -30   87.19   13.60
  -2   2 -30  134.09   16.80
   2  -2 -30  114.19   21.60
   2  -2 -30  102.79   10.10
   3   2 -30  591.14   29.50
   3   2 -30  623.14   18.30
  -3   2 -30  630.64   22.20
   3  -2 -30  615.54   17.60
  -3  -2  30  609.54   27.10
   3  -2 -30  595.94   27.00
   4   2 -30   29.60    6.90
   4   2 -30   19.10   13.20
  -4  -2  30   19.30   11.70
   4  -2 -30   39.70    6.50
   4  -2 -30   20.60   12.20
   5   2 -30  140.79   10.20
  -5   2  30  123.99   15.10
   5   2 -30  104.29   17.10
   5  -2 -30  138.99    8.60
  -5  -2  30  139.09   18.90
  -6   2  30   13.90    7.20
   6   2 -30    3.10    4.40
  -6  -2  30   30.10    8.20
   6  -2 -30   16.50    3.80
   0   3 -30   90.19   17.20
   0  -3 -30  104.29   17.00
   0  -3 -30   79.29    8.80
   0   3 -30   75.09   12.70
  -1  -3 -30  107.69   20.50
   1   3 -30  114.09   16.90
   1   3 -30  102.09   18.00
  -1   3 -30  109.49   20.80
   1  -3 -30  118.39   17.50
  -1   3 -30  109.69   17.00
   1  -3 -30  103.49    9.10
   2   3 -30   33.20    9.90
  -2  -3 -30   44.70   15.00
   2   3 -30   37.70   17.10
   2  -3 -30   47.40    7.20
  -2   3 -30   54.99   12.20
   2  -3 -30   55.59   15.30
  -2  -3  30   56.69   14.20
   3   3 -30   31.00    7.10
   3   3 -30   10.60   14.90
  -3  -3  30   15.40   12.30
   3  -3 -30   11.90   12.20
  -3   3 -30    8.30    9.90
   3  -3 -30   19.90    6.60
   4   3 -30   65.69   13.70
   4   3 -30   71.29   10.10
   4  -3 -30   60.99    7.00
   4  -3 -30   58.59   12.00
  -4  -3  30   39.40   11.50
   5   3 -30   15.00    9.80
  -5   3  30    7.40    8.50
   5   3 -30    5.20    5.50
  -5  -3  30    3.40    9.80
   5  -3 -30   -0.40    4.30
   0   4 -30  139.59   18.10
   0   4 -30  120.69   23.40
   0  -4 -30  104.49   20.70
   0  -4 -30  122.59   10.10
  -1  -4 -30  195.88   20.30
   1   4 -30  224.18   25.40
   1   4 -30  218.88   17.00
   1  -4 -30  176.68   20.50
   1  -4 -30  204.38   11.20
  -1  -4  30  216.78   20.30
  -1   4 -30  209.88   19.30
   2   4 -30   63.99   16.40
   2   4 -30   86.29   14.90
   2  -4 -30   96.79   18.80
  -2  -4  30  104.49   12.90
  -2   4 -30  104.19   15.40
   2  -4 -30   85.99    9.50
   3   4 -30  108.69   21.40
   3   4 -30  124.49    9.50
   3  -4 -30  133.99   19.10
  -3   4 -30  135.79   14.50
   3  -4 -30  163.78    9.80
  -3  -4  30   86.89   12.40
   4   4 -30   38.40   12.00
  -4   4  30   40.10    8.60
   4   4 -30   26.90    6.10
   4  -4 -30   46.00    5.80
  -4  -4  30   21.50   10.80
  -5   4  30   22.80   11.70
  -5   4  30   18.90    7.20
   5   4 -30   19.40    4.80
   5  -4 -30   17.60    4.30
  -5  -4  30   19.50    8.20
   0  -5 -30   37.40    6.10
   0   5 -30   44.50   14.30
   0   5 -30   52.09   12.10
   1   5 -30   16.80   14.50
   1   5 -30   31.40   10.00
  -1   5 -30   13.90   11.10
   1  -5 -30    6.50    5.90
   2   5 -30  101.49   13.80
   2   5 -30  110.49   22.40
   2  -5 -30  132.69    9.20
  -2   5 -30  123.69   15.00
   3   5 -30   -0.30   12.80
  -3  -5  30    2.50    9.00
  -3   5 -30   21.60    8.50
   3  -5 -30   27.70    5.50
  -4   5  30   42.90   10.80
   4   5 -30   24.90   10.20
   4   5 -30   29.50    5.70
   4  -5 -30   46.10    4.90
  -4  -5  30   41.20    8.20
   0   6 -30   29.40    9.40
   0   6 -30   30.90   11.20
   1   6 -30   29.00   12.50
   1   6 -30   18.90    8.00
  -1   6 -30   25.30    9.60
   1  -6 -30   22.00    5.20
   2   6 -30  129.29   18.00
   2   6 -30   96.09   12.30
   2  -6 -30  113.89    7.40
  -2   6 -30  112.69   11.80
   3   6 -30   47.70   10.80
   3  -6 -30   56.39    5.80
   0   0 -31    0.40   14.50
   0   0 -31   -3.30   10.30
  -1   0 -31    5.40   11.00
  -1   0 -31   12.90   14.30
   1   0 -31   -2.20   15.00
   1   0 -31    7.70    9.60
   2   0 -31  138.79   14.70
  -2   0 -31  146.29   16.10
   2   0 -31  144.99   10.10
   2   0 -31  101.19   16.70
  -3   0 -31  187.18   15.70
   3   0 -31  194.68   21.20
   3   0 -31  185.38   11.60
  -4   0  31  216.58   17.70
   4   0 -31  230.78   11.40
  -4   0  31  198.98   19.50
   4   0 -31  215.28   20.80
  -5   0  31    3.40    8.80
   5   0 -31    7.70    5.60
  -5   0  31    6.50    9.30
   6   0 -31    0.10    4.10
  -6   0  31    8.50    6.30
   0  -1 -31   51.59   15.40
   0   1 -31   54.29   11.10
   0  -1 -31   54.19   11.60
   0   1 -31   59.49   15.20
   1   1 -31   45.90   10.70
  -1  -1 -31   25.80   13.60
  -1  -1 -31   44.10   11.00
   1   1 -31   52.39   14.80
  -1   1 -31   38.20   15.40
  -1   1 -31   37.70   10.70
   1  -1 -31   53.79   10.80
   1  -1 -31   54.89   15.80
   1  -1 -31   48.90    6.70
  -2  -1 -31   35.70   11.10
   2   1 -31   16.10    6.70
   2   1 -31   18.60   13.90
   2   1 -31   22.70    9.20
  -2   1 -31   30.50   10.50
   2  -1 -31   21.40    9.20
   2  -1 -31   22.60   14.90
   2  -1 -31   29.60    6.60
   3   1 -31    4.80   13.50
   3   1 -31    0.10    6.40
  -3  -1 -31   -1.90    9.40
   3  -1 -31    5.10    6.20
   3  -1 -31   23.10   13.60
  -3  -1  31    1.90   14.40
  -3   1 -31    6.30    9.80
   4   1 -31   68.89   13.90
   4   1 -31   63.99    9.30
  -4   1  31   47.20   10.90
   4  -1 -31   58.39    6.90
   4  -1 -31   57.99   12.70
  -4  -1  31   43.60   11.80
  -4  -1  31   70.59   10.50
  -5   1  31   24.00    9.00
   5   1 -31   19.60    6.00
   5  -1 -31   24.30    5.70
  -5  -1  31   28.00    8.20
  -5  -1  31   11.10   10.30
   6   1 -31   31.70    4.20
  -6   1  31   23.50    6.80
   6  -1 -31   31.00    4.10
   0  -2 -31  164.38   21.80
   0  -2 -31  148.19   16.20
   0   2 -31  148.59   21.90
   0   2 -31  145.29   17.20
   1   2 -31   17.10   14.20
  -1  -2 -31   18.90   13.90
  -1  -2 -31   11.80    9.90
   1   2 -31    8.80    9.80
   1  -2 -31   13.40    9.80
  -1   2 -31   14.90   11.40
  -1   2 -31    7.60   13.80
   1  -2 -31   11.40   14.70
   1  -2 -31   10.60    6.10
   2   2 -31   51.49   15.30
   2   2 -31   92.19    9.20
  -2  -2 -31   81.09   12.00
   2   2 -31   87.59   14.00
   2  -2 -31   78.69   15.20
  -2   2 -31   63.79   11.50
   2  -2 -31   87.09    9.30
   3   2 -31   41.40   14.60
   3   2 -31   53.79    7.40
  -3   2 -31   51.09   10.50
   3  -2 -31   72.89   14.50
   3  -2 -31   58.59    9.10
  -3  -2  31   57.59   13.90
   4   2 -31   27.80   12.40
   4   2 -31   45.70    7.00
  -4  -2  31   43.30   12.40
   4  -2 -31   47.50    6.50
   4  -2 -31   27.00   11.70
  -5   2  31  135.09   13.20
   5   2 -31  128.09   16.50
   5   2 -31  136.39    9.30
  -5  -2  31  118.79   17.60
   5  -2 -31  140.69    8.10
   0  -3 -31    8.80    6.20
   0   3 -31    2.20   13.90
   0  -3 -31    2.70   13.40
   0   3 -31    0.50   10.70
  -1  -3 -31   42.20   14.60
   1   3 -31   21.40   10.10
   1   3 -31   46.50   14.40
   1  -3 -31   43.80    6.70
  -1   3 -31   61.49   12.40
   1  -3 -31   46.90   15.50
   2   3 -31    8.90   13.90
   2   3 -31   -1.40    9.20
  -2  -3 -31    4.20   11.70
  -2  -3  31   -2.30   12.30
  -2   3 -31   -3.20   10.10
   2  -3 -31   -5.90   13.50
   2  -3 -31    6.70    6.10
   3   3 -31  208.18   20.90
   3   3 -31  223.38   11.10
   3  -3 -31  208.28   20.70
  -3   3 -31  227.38   16.20
  -3  -3  31  220.48   19.90
   3  -3 -31  232.68   10.90
   4   3 -31   38.20    6.30
   4   3 -31   41.20   12.90
  -4  -3  31   53.49   11.10
   4  -3 -31   55.09    8.20
   4  -3 -31   56.39   10.70
  -5   3  31    9.30    7.70
   5   3 -31    8.70    5.00
   5   3 -31    9.10    9.60
  -5  -3  31    3.90    9.30
   5  -3 -31   -3.40    4.10
   0  -4 -31   42.70    6.30
   0   4 -31   41.00   11.20
   0   4 -31   42.60   14.00
   0  -4 -31   23.40   15.00
   1   4 -31    8.30   15.30
   1   4 -31   28.90   10.90
   1  -4 -31    8.60    6.00
   1  -4 -31   -4.10   12.60
  -1  -4  31   15.70   11.90
  -1   4 -31   13.60   10.50
   2   4 -31   51.49    9.50
   2   4 -31   55.79   15.60
   2  -4 -31   51.79   13.50
   2  -4 -31   61.39    6.60
  -2   4 -31   59.19   11.60
  -2  -4  31   64.39   11.70
   3   4 -31   81.89    8.50
   3   4 -31   61.39   13.20
  -3  -4  31   96.79   11.60
  -3   4 -31   91.39   12.40
   3  -4 -31  102.69    8.70
   3  -4 -31   87.89   18.50
  -4   4  31    6.40    7.40
   4   4 -31    1.10   10.80
   4   4 -31    0.50    4.80
   4  -4 -31   14.40    4.70
  -4  -4  31    2.60    9.10
   0  -5 -31   60.69    8.20
   0   5 -31   65.09   10.80
   0   5 -31   24.90   12.00
   1   5 -31   31.10   13.90
   1   5 -31   37.40    9.70
  -1   5 -31   20.20    9.60
   1  -5 -31   29.00    5.90
   2   5 -31   39.90    8.10
   2   5 -31   54.79   14.30
   2  -5 -31   66.49    8.00
  -2   5 -31   61.99   10.70
   3   5 -31   39.50   12.60
   3  -5 -31   66.69    7.40
  -3   5 -31   49.80   10.50
  -3  -5  31   54.89    8.80
   4   5 -31   -3.80   12.80
   4  -5 -31    7.70    4.40
   0   6 -31   26.30    8.20
   1   6 -31    4.90    7.50
   1   6 -31    7.50   10.30
  -1   6 -31    1.90    7.60
   2   6 -31   54.49   11.20
  -2   6 -31   72.19   11.20
   2  -6 -31   88.49    6.80
   0   0 -32   77.49   16.40
   0   0 -32   54.09   11.20
   1   0 -32  254.87   23.20
   1   0 -32  257.57   17.00
  -1   0 -32  264.77   21.70
  -1   0 -32  254.67   18.20
   2   0 -32   -6.00    6.00
   2   0 -32    2.00    8.60
  -2   0 -32    8.80   10.10
   2   0 -32    4.00   13.40
  -3   0 -32  224.08   15.90
   3   0 -32  205.58   11.20
   3   0 -32  179.58   21.10
   4   0 -32   38.20    6.30
  -4   0  32   44.40    9.70
   4   0 -32   30.70   12.00
  -4   0  32   36.20   10.70
  -5   0  32    6.20    8.10
   5   0 -32    7.70    5.30
  -5   0  32    1.00    9.30
   0   1 -32   20.80   15.10
   0  -1 -32    3.20   14.40
   0   1 -32   -6.00    9.50
   0  -1 -32    3.60   10.40
   1   1 -32   51.69   15.00
  -1  -1 -32   51.39   11.20
   1   1 -32   75.29   15.00
  -1  -1 -32   60.79   14.90
   1  -1 -32   59.69   15.00
   1  -1 -32   67.89   11.60
   1  -1 -32   70.99    8.50
  -1   1 -32   75.89   15.30
  -1   1 -32   70.89   15.40
   2   1 -32   25.30    8.90
  -2  -1 -32   16.10   10.90
   2   1 -32   26.00    6.50
   2   1 -32   28.00   13.80
  -2   1 -32   34.70   11.50
   2  -1 -32   27.50   13.60
   2  -1 -32   20.10    6.40
   2  -1 -32   25.40    9.10
   3   1 -32   40.20   14.30
  -3  -1 -32   14.90    9.40
   3   1 -32   24.00    6.40
   3  -1 -32   17.70    6.80
  -3  -1  32   17.90    9.70
  -3   1 -32   18.10    9.70
   3  -1 -32   15.60   12.70
  -3  -1  32   10.20   12.70
  -4   1  32   35.80   10.10
   4   1 -32   32.70   12.80
  -4   1  32   48.20   10.10
   4   1 -32   40.40    6.30
   4  -1 -32   35.90    6.10
   4  -1 -32   40.50   12.20
  -4  -1  32   47.30    9.50
  -4  -1  32   30.60   10.80
  -5   1  32   81.59   13.20
   5   1 -32   95.39    7.70
  -5  -1  32   92.69   11.30
   5  -1 -32   96.09    7.80
  -5  -1  32   79.09   10.90
   0   2 -32    8.80   14.00
   0  -2 -32   10.10   10.40
   0  -2 -32   11.10   14.40
   0   2 -32    4.30   10.80
   1   2 -32  114.79   21.60
  -1  -2 -32  110.09   20.40
  -1  -2 -32   87.79   15.50
   1   2 -32   86.19   15.20
  -1   2 -32   67.99   15.10
   1  -2 -32   65.19   10.30
   1  -2 -32   59.69   14.40
  -1   2 -32   61.59   11.40
   1  -2 -32   69.09    9.30
   2   2 -32  201.68   16.10
  -2  -2 -32  222.28   16.80
   2   2 -32  209.78   22.20
  -2   2 -32  209.88   16.30
   2  -2 -32  221.08   11.20
   2  -2 -32  189.98   22.40
   3   2 -32  261.67   11.60
   3   2 -32  266.37   21.70
   3  -2 -32  265.07   11.10
  -3   2 -32  262.37   17.10
   3  -2 -32  274.97   22.70
  -3  -2  32  287.47   21.80
   4   2 -32    4.50    5.80
  -4   2  32    7.10    8.80
   4   2 -32  -11.30   12.00
  -4  -2  32    8.40   10.50
   4  -2 -32    1.40   10.50
   4  -2 -32    2.40    5.30
   5   2 -32  158.78    8.60
   5   2 -32  168.58   18.60
  -5   2  32  163.88   13.40
  -5  -2  32  167.28   14.80
   5  -2 -32  164.48    8.20
   0  -3 -32  111.99   19.20
   0   3 -32  116.19   16.20
   0   3 -32  119.19   21.20
   1   3 -32  132.39   20.90
   1   3 -32  123.69   15.30
  -1  -3 -32   97.29   18.10
   1  -3 -32  109.19   19.20
  -1   3 -32  144.49   17.50
   1  -3 -32  123.69    9.60
   2   3 -32   22.20    8.70
   2   3 -32    9.10   13.40
   2  -3 -32   17.70    5.60
  -2   3 -32    5.70   10.40
   2  -3 -32    7.60   12.60
  -2  -3  32   15.60   12.20
   3   3 -32   16.30    5.90
   3   3 -32   -0.40   12.40
  -3  -3  32   -4.00   10.30
  -3   3 -32   14.50    9.20
   3  -3 -32    8.70    5.20
   3  -3 -32    4.90   11.10
   4   3 -32   22.40    5.80
   4   3 -32    4.10   10.70
  -4   3  32   12.80    8.30
   4  -3 -32    8.60    9.70
   4  -3 -32   10.60    4.80
  -4  -3  32    9.50    9.90
  -5   3  32   26.80   11.30
   5   3 -32   26.60    4.50
  -5   3  32   35.60    6.90
   5  -3 -32   23.40    4.10
  -5  -3  32   18.50    7.90
   0   4 -32   81.29   15.80
   0   4 -32   45.30   13.70
   0  -4 -32   72.79    8.30
   0  -4 -32   46.50   12.30
   1   4 -32  151.38   14.80
   1   4 -32  145.69   18.70
   1  -4 -32  134.89   21.60
   1  -4 -32  142.59    9.70
  -1  -4  32  142.19   18.40
  -1   4 -32  146.49   17.00
   2   4 -32   89.99   13.00
   2   4 -32   90.39   13.80
  -2  -4  32   71.19   11.30
   2  -4 -32   88.19    9.00
   2  -4 -32   97.09   19.30
  -2   4 -32  100.69   15.40
   3   4 -32   32.60   12.70
   3  -4 -32   40.00    5.70
  -3  -4  32   22.00    9.80
  -3   4 -32   44.10    8.30
  -4   4  32   42.80    7.50
   4   4 -32   28.80   10.50
   4   4 -32   41.50    6.20
  -4  -4  32   36.80    8.70
   4  -4 -32   59.89    6.60
   0   5 -32  167.88   15.20
   0   5 -32  159.98   17.50
   0  -5 -32  184.28    8.80
   1   5 -32   30.50   11.20
   1   5 -32   37.00    8.50
  -1   5 -32   26.20    9.80
   1  -5 -32   42.40    5.70
   2   5 -32   20.40    7.10
   2   5 -32   29.70   11.00
  -2   5 -32   20.10    8.40
   2  -5 -32   31.10    5.30
   3   5 -32   11.50   10.60
   3  -5 -32    3.00    4.30
  -3   5 -32    1.10   10.70
   0   6 -32    4.70    7.10
   1   6 -32   -3.10    7.70
   1   6 -32   20.90   13.20
  -1   6 -32    7.10    6.80
   0   0 -33   -8.10   13.90
   0   0 -33    0.20   10.60
  -1   0 -33   91.39   15.40
   1   0 -33  119.99   14.80
   1   0 -33  125.19   21.50
  -1   0 -33   99.49   18.80
   2   0 -33   12.60    8.90
   2   0 -33    4.20   13.70
   2   0 -33   12.40    5.80
  -2   0 -33   10.70    9.80
  -3   0  33   19.70   11.40
   3   0 -33    9.50    6.20
  -3   0 -33   11.20    9.40
   3   0 -33    6.10   13.40
   4   0 -33   39.30    6.10
  -4   0  33   22.40    9.70
  -4   0  33   29.10    8.60
   4   0 -33   12.00   11.50
   5   0 -33   70.99    7.60
  -5   0  33   68.19    8.90
  -5   0  33   73.59   11.90
   0   1 -33   46.80   11.00
   0  -1 -33   40.70   11.00
   0   1 -33   45.90   14.70
   0  -1 -33   56.89   15.40
  -1  -1 -33   20.30   10.90
   1   1 -33    5.30    9.40
  -1  -1 -33   19.70   13.50
   1   1 -33    9.10   14.80
  -1   1 -33   22.30   14.00
  -1   1 -33   31.40   11.20
   1  -1 -33   23.00   13.50
   1  -1 -33    8.30    9.60
  -2  -1 -33  113.69   15.90
   2   1 -33   98.99   20.90
   2   1 -33  106.99   13.30
   2   1 -33  104.79    9.30
   2  -1 -33   92.29   13.50
  -2   1 -33  120.29   15.40
   2  -1 -33   99.79    9.30
   2  -1 -33   99.59   20.90
  -3  -1 -33   23.00    9.00
   3   1 -33   25.00    6.40
   3   1 -33   22.30   14.20
   3  -1 -33   27.20    5.90
   3  -1 -33   44.40   13.60
  -3   1 -33   27.30    9.20
  -3  -1  33   39.70   11.80
  -4   1  33   96.09   14.30
  -4   1  33  101.89   13.90
   4   1 -33  113.79    9.00
   4   1 -33   92.89   13.40
   4  -1 -33  109.79   16.90
  -4  -1  33  108.99   17.90
  -4  -1  33  106.69   13.60
   4  -1 -33  119.09    8.00
  -5   1  33   12.80    7.70
   5   1 -33   17.10    4.70
  -5  -1  33   12.60    8.10
   5  -1 -33   20.30    4.40
   0   2 -33  162.08   15.70
   0  -2 -33  163.58   22.50
   0   2 -33  193.38   20.40
   0  -2 -33  161.48   16.30
   1   2 -33  108.19   21.60
  -1  -2 -33  114.59   17.80
  -1  -2 -33   96.39   14.30
   1   2 -33  106.59   15.30
  -1   2 -33  104.09   14.90
   1  -2 -33   94.69   14.80
  -1   2 -33   95.19   20.60
   1  -2 -33  100.49    8.10
   1  -2 -33   98.39   20.30
   2   2 -33   11.20   13.10
   2   2 -33   21.30    8.50
   2  -2 -33   19.70    6.00
   2  -2 -33   11.70   13.10
  -2   2 -33   14.90    9.60
   3   2 -33   24.30   12.40
   3   2 -33   27.10    5.90
  -3  -2  33   48.60   11.80
   3  -2 -33   36.60    6.20
   3  -2 -33   25.20   11.90
  -3   2 -33   30.60    9.40
  -4   2  33   50.39    8.70
   4   2 -33   24.60   11.60
   4   2 -33   41.70    5.60
   4  -2 -33   53.09   10.70
  -4  -2  33   37.40   10.60
   4  -2 -33   71.29    7.50
   5   2 -33   20.90    4.10
  -5   2  33   37.80    7.10
  -5  -2  33   42.30    8.40
   5  -2 -33   44.60    5.70
   0   3 -33    9.20   10.00
   0   3 -33   10.20   13.10
   0  -3 -33    8.70   12.50
   1   3 -33  100.89   14.20
  -1  -3 -33   97.59   18.50
   1   3 -33  115.39   19.70
   1  -3 -33  105.19    7.90
  -1   3 -33  139.19   15.60
   1  -3 -33   84.69   13.90
   2   3 -33  361.66   16.50
   2   3 -33  352.76   22.50
   2  -3 -33  326.27   21.90
   2  -3 -33  367.26   12.00
  -2   3 -33  364.66   18.40
  -2  -3  33  323.77   21.50
   3   3 -33   28.40    5.50
   3   3 -33   29.80   12.70
   3  -3 -33   15.80   11.00
   3  -3 -33   25.60    5.20
  -3  -3  33   17.30   10.90
  -3   3 -33   29.60    8.90
   4   3 -33   47.80    7.30
  -4   3  33   41.40    7.90
   4   3 -33   48.10   11.10
   4  -3 -33   19.80    9.00
  -4  -3  33   17.90   10.00
   4  -3 -33   33.10    4.90
   0   4 -33    9.10   11.80
   0  -4 -33  -10.10   11.20
   0   4 -33    5.00    9.10
   1   4 -33   62.79   13.70
   1   4 -33   76.59   12.60
  -1  -4  33   80.99   11.00
   1  -4 -33   79.09    8.10
   1  -4 -33   61.59   13.30
  -1   4 -33   89.19   14.40
   2   4 -33   -4.40   12.40
   2   4 -33    5.50    7.30
  -2  -4  33   12.20   10.00
  -2   4 -33    6.80    8.90
   2  -4 -33    6.50   10.40
   2  -4 -33    4.30    5.10
   3   4 -33   -7.10   11.20
  -3   4 -33   -2.50    6.80
  -3  -4  33   -7.90    8.90
   3  -4 -33   -6.40    4.40
   4   4 -33   77.09   14.10
  -4   4  33   88.89   13.30
  -4  -4  33   91.79   13.60
   4  -4 -33   89.29    5.80
   0   5 -33   -2.50    9.30
   0   5 -33   -6.60    7.80
   1   5 -33    7.20   10.10
   1   5 -33   11.30    7.40
   1  -5 -33   21.50    4.60
  -1   5 -33   12.50    8.30
   2   5 -33  121.49   15.90
   2  -5 -33  152.38    7.80
  -2   5 -33  131.79   12.10
   0   0 -34  416.66   19.10
   0   0 -34  391.46   24.30
  -1   0 -34   49.80   10.90
   1   0 -34   43.60   14.70
   1   0 -34   34.60    9.70
  -1   0 -34   32.10   12.70
   2   0 -34   39.70    8.80
   2   0 -34   34.60    5.60
   2   0 -34   36.00   13.90
  -2   0 -34   41.50    9.90
   3   0 -34  163.28    9.60
  -3   0  34  167.88   17.00
  -3   0 -34  169.28   14.10
   3   0 -34  148.49   18.20
   4   0 -34   78.29    7.60
   4   0 -34   54.49   11.10
  -4   0  34   79.79   12.90
  -4   0  34   65.89   10.30
   5   0 -34    3.70    3.80
   0  -1 -34   57.69   14.70
   0   1 -34   64.99   11.50
   0   1 -34   66.29   15.00
   0  -1 -34   63.19   10.70
  -1  -1 -34   11.70   10.20
   1   1 -34   11.20   13.40
   1   1 -34   11.20    9.40
  -1  -1 -34    9.90   13.50
   1  -1 -34   13.70   13.30
  -1   1 -34    7.40   10.20
   1  -1 -34    3.00    8.90
  -1   1 -34   24.40   12.20
  -2  -1 -34   86.59   14.60
   2   1 -34   92.99   13.30
   2   1 -34   81.89   14.80
  -2   1 -34   98.39   15.30
   2  -1 -34  107.59   12.60
   2  -1 -34  100.59    8.00
   2  -1 -34   72.19   14.00
  -3   1  34   24.80   10.10
   3   1 -34   30.20    5.60
   3   1 -34   34.60   12.80
  -3  -1 -34   37.20    8.90
   3  -1 -34   35.70   12.30
   3  -1 -34   34.60    5.90
  -3   1 -34   37.40    8.90
  -3  -1  34   26.10   11.60
  -4   1  34   14.70   10.30
   4   1 -34   14.70    5.10
  -4   1  34   14.30    7.70
   4   1 -34   14.30   10.40
  -4  -1  34   20.10    9.40
   4  -1 -34   21.00    4.90
   4  -1 -34   17.30    9.90
[truncated: 11,646 more chars]
